# Supplementary material for: Proteomic profiling of the endogenous peptides of MRSA and MSSA
Source: PeerJ journal article supplement (doi:10.7717/peerj.12508), 2021-11-24
Supplement: Supplementary_Table_S1.xlsx [file Supplementary_Table_S1.xlsx]

## Sheet: sheet1
Supplementary Tables
Table S1. Information of the endogenous peptides identified by mass spectrometry in S. aureus
Sequence	Entry	Protein.names	Gene.names	GeneID	Length	Isoelectric point	Mass	Proteins	Unique..Groups.	Unique..Proteins.	Charges	PEP	Score	Intensity	Intensity.25923.1	Intensity.25923.2	Intensity.25923.3	Intensity.43300.1	Intensity.43300.2	Intensity.43300.3	Intensity.patient.1	Intensity.patient.2	Intensity.patient.3
SESNEISSKE	Q9F0R1	HTH-type transcriptional regulator SarR (Staphylococcal accessory regulator R)	sarR SAOUHSC_02566	3921563	10	3.9798	1108.49	Q9F0R1	yes	yes	2	0.0033279	133.07	193100	35548	0	0	0	0	0	124090	33465	0
SESNEISSKEIAK	Q9F0R1	HTH-type transcriptional regulator SarR (Staphylococcal accessory regulator R)	sarR SAOUHSC_02566	3921563	13	4.4788	1420.7	Q9F0R1	yes	yes	2,3	1.9636e-26	204.85	7801400	351210	280550	392150	163100	1341500	917190	2815300	905610	634710
SKINDIND	Q9F0R1	HTH-type transcriptional regulator SarR (Staphylococcal accessory regulator R)	sarR SAOUHSC_02566	3921563	8	4.109	917.445	Q9F0R1	yes	yes	2	5.1511e-06	179.37	1650400	268570	0	260610	186300	153550	107880	301560	206980	164980
SKINDINDLVN	Q9F0R1	HTH-type transcriptional regulator SarR (Staphylococcal accessory regulator R)	sarR SAOUHSC_02566	3921563	11	4.109	1243.64	Q9F0R1	yes	yes	2	0.0031702	126.19	189970	128170	0	22447	0	39359	0	0	0	0
VTDTQKANIQK	Q9F0R1	HTH-type transcriptional regulator SarR (Staphylococcal accessory regulator R)	sarR SAOUHSC_02566	3921563	11	8.9961	1244.67	Q9F0R1	yes	yes	3	0.030761	79.974	0	0	0	0	0	0	0	0	0	0
AIKDFLDED	Q7BHL7	Regulatory protein MsrR	msrR SAOUHSC_01361	3920066	9	3.6989	1064.5	Q7BHL7	yes	yes	2	1.1512e-06	195.7	309850	56952	20218	36280	52542	109110	19711	15038	0	0
IMVVQYDFINKKMKMM	Q7BHL7	Regulatory protein MsrR	msrR SAOUHSC_01361	3920066	16	10.1022	2018.02	Q7BHL7	yes	yes	2	0.0054331	75.669	0	0	0	0	0	0	0	0	0	0
MDKETNDNEYR	Q7BHL7	Regulatory protein MsrR	msrR SAOUHSC_01361	3920066	11	4.1051	1413.58	Q7BHL7	yes	yes	3	0.01018	17.809	0	0	0	0	0	0	0	0	0	0
TFDLSDAKKTS	Q2G2Y3	Uncharacterized protein	SAOUHSC_01919	3921061	11	5.9023	1211.6	Q2G2Y3	yes	yes	2	0.0038334	123.51	88334	0	0	0	0	0	0	19894	68440	0
TNPNQRLEPFDE	Q2G2W2	Uncharacterized protein	SAOUHSC_02628	3921405	12	3.9274	1458.67	Q2G2W2	yes	yes	2	0.0020086	115.57	380210	369060	0	11149	0	0	0	0	0	0
TAQKLDADNSINHE	Q2G2W1	Drug resistance transporter, EmrB/QacA subfamily, putative	SAOUHSC_02629	3921406	14	4.3656	1554.73	Q2G2W1	yes	yes	3	0.003714	97.273	700690	58219	133220	328600	0	0	0	180650	0	0
NNQSGELTYQ	Q2G2U3	Uncharacterized protein	SAOUHSC_00022	3919193	10	3.8497	1152.5	Q2G2U3	yes	yes	2	0.0071115	122.69	522450	0	0	104000	18770	0	0	0	0	399680
VFNTISVEKM	Q2G2U3	Uncharacterized protein	SAOUHSC_00022	3919193	10	5.8613	1166.6	Q2G2U3	yes	yes	2	0.043549	94.363	91681	22582	23642	45457	0	0	0	0	0	0
NFNIEDNKAT	Q2G2U2	Uncharacterized protein	SAOUHSC_00023	3919194	10	4.184	1164.54	Q2G2U2	yes	yes	2	0.0062679	123.51	142690	33910	40399	68383	0	0	0	0	0	0
ALQQQGLTADKYKE	Q2G2S6	Foldase protein PrsA (EC 5.2.1.8)	prsA SAOUHSC_01972	3920448	14	5.9475	1591.82	Q2G2S6	yes	yes	3	0.0032799	98.902	470780	470780	0	0	0	0	0	0	0	0
DKPTDFNSEKQ	Q2G2S6	Foldase protein PrsA (EC 5.2.1.8)	prsA SAOUHSC_01972	3920448	11	4.3699	1307.6	Q2G2S6	yes	yes	2	0.00053048	142.1	3246500	338940	965230	1723200	219180	0	0	0	0	0
DKPTDFNSEKQSL	Q2G2S6	Foldase protein PrsA (EC 5.2.1.8)	prsA SAOUHSC_01972	3920448	13	4.3699	1507.72	Q2G2S6	yes	yes	2,3	0.002343	107.53	721580	113300	76443	515470	0	0	16360	0	0	0
GLTADKYKE	Q2G2S6	Foldase protein PrsA (EC 5.2.1.8)	prsA SAOUHSC_01972	3920448	9	5.9475	1023.52	Q2G2S6	yes	yes	2	0.026208	114.84	3046400	1645900	84487	1279700	0	0	36267	0	0	0
KQGGAQGGQSGMSQ	Q2G2S6	Foldase protein PrsA (EC 5.2.1.8)	prsA SAOUHSC_01972	3920448	14	9.15	1319.59	Q2G2S6	yes	yes	2	1.429e-77	268.93	6009400	0	0	6009400	0	0	0	0	0	0
LKQGGAQGGQSGMSQ	Q2G2S6	Foldase protein PrsA (EC 5.2.1.8)	prsA SAOUHSC_01972	3920448	15	9.15	1432.67	Q2G2S6	yes	yes	2	6.0017e-31	128.71	0	0	0	0	0	0	0	0	0	0
LQQQGLTADKY	Q2G2S6	Foldase protein PrsA (EC 5.2.1.8)	prsA SAOUHSC_01972	3920448	11	5.7894	1263.65	Q2G2S6	yes	yes	2	0.00506	118.9	92658	76164	16494	0	0	0	0	0	0	0
LQQQGLTADKYKE	Q2G2S6	Foldase protein PrsA (EC 5.2.1.8)	prsA SAOUHSC_01972	3920448	13	5.9475	1520.78	Q2G2S6	yes	yes	3	0.00017873	124.12	981130	151660	119410	566740	90534	52787	0	0	0	0
NLRTAAYHKE	Q2G2S6	Foldase protein PrsA (EC 5.2.1.8)	prsA SAOUHSC_01972	3920448	10	8.7791	1201.62	Q2G2S6	yes	yes	3	0.025523	105.46	2159400	230850	1169000	0	602880	0	156630	0	0	0
NPEKLKQGGAQGGQSGMSQ	Q2G2S6	Foldase protein PrsA (EC 5.2.1.8)	prsA SAOUHSC_01972	3920448	19	8.9962	1900.91	Q2G2S6	yes	yes	3	0.0040343	103.04	368200	136860	107020	124330	0	0	0	0	0	0
PEKLKQGGAQGGQSGMSQ	Q2G2S6	Foldase protein PrsA (EC 5.2.1.8)	prsA SAOUHSC_01972	3920448	18	8.9962	1786.86	Q2G2S6	yes	yes	2,3	2.9082e-08	135.72	13087000	1644700	1730000	2548700	0	2611800	2428100	1059100	618200	446800
QGLTADKYKE	Q2G2S6	Foldase protein PrsA (EC 5.2.1.8)	prsA SAOUHSC_01972	3920448	10	5.9475	1151.58	Q2G2S6	yes	yes	3	0.034658	97.565	800540	248910	101240	394400	0	0	55979	0	0	0
SKAGDVTVA	Q2G2S6	Foldase protein PrsA (EC 5.2.1.8)	prsA SAOUHSC_01972	3920448	9	5.7899	846.445	Q2G2S6	yes	yes	2	0.031644	110.76	13535000	3474100	1829500	6332600	0	528790	601390	326650	260420	181260
SKAGDVTVADT	Q2G2S6	Foldase protein PrsA (EC 5.2.1.8)	prsA SAOUHSC_01972	3920448	11	4.109	1062.52	Q2G2S6	yes	yes	2	4.0944e-08	165.63	6929100	0	2405800	4378300	0	0	145000	0	0	0
SKAGDVTVADTM	Q2G2S6	Foldase protein PrsA (EC 5.2.1.8)	prsA SAOUHSC_01972	3920448	12	4.109	1193.56	Q2G2S6	yes	yes	2	0.0081721	103.88	171310	91329	0	79985	0	0	0	0	0	0
SLKEKLVDQ	Q2G2S6	Foldase protein PrsA (EC 5.2.1.8)	prsA SAOUHSC_01972	3920448	9	5.9481	1058.6	Q2G2S6	yes	yes	2	0.0079274	133.23	166800	0	0	166800	0	0	0	0	0	0
TDSKENTLIS	Q2G2S6	Foldase protein PrsA (EC 5.2.1.8)	prsA SAOUHSC_01972	3920448	10	4.184	1106.55	Q2G2S6	yes	yes	2	0.0034178	132.25	1659400	502950	1097200	0	59254	0	0	0	0	0
TLISSKAGDVTVA	Q2G2S6	Foldase protein PrsA (EC 5.2.1.8)	prsA SAOUHSC_01972	3920448	13	5.7899	1260.69	Q2G2S6	yes	yes	2	0.00019887	123.28	213070	156360	12737	43977	0	0	0	0	0	0
EYKPTEENKKL	Q2G2R0	Galactose-6-phosphate isomerase subunit LacB (EC 5.3.1.26)	lacB SAOUHSC_02454	3919017	11	6.065	1377.71	Q2G2R0	yes	yes	2	0.012188	106.4	70579	0	0	0	14326	56253	0	0	0	0
AISQERKNEIIKE	Q2G2Q1	30S ribosomal protein S15	rpsO SAOUHSC_01250	3919981	13	6.0657	1556.85	Q2G2Q1	yes	yes	3	0.00036595	116.24	1357100	665800	42503	0	47243	601590	0	0	0	0
HETDTGSPEVQ	Q2G2Q1	30S ribosomal protein S15	rpsO SAOUHSC_01250	3919981	11	3.9262	1198.51	Q2G2Q1	yes	yes	2	0.010006	108.43	4261000	387730	277950	508510	1208600	366380	472090	972490	0	67288
HETDTGSPEVQI	Q2G2Q1	30S ribosomal protein S15	rpsO SAOUHSC_01250	3919981	12	3.9262	1311.59	Q2G2Q1	yes	yes	2	4.7562e-17	122.69	2265400	138520	73248	227020	138960	271990	173960	1241700	0	0
RVHETDTGSPEVQ	Q2G2Q1	30S ribosomal protein S15	rpsO SAOUHSC_01250	3919981	13	4.421	1453.68	Q2G2Q1	yes	yes	2,3	5.3473e-11	168.31	2871600	913920	289510	0	801400	479630	155740	0	231440	0
AELPQSRIN	Q2G2Q0	DNA gyrase subunit A (EC 5.6.2.3)	gyrA SAOUHSC_00006	3919179	9	5.8614	1026.55	Q2G2Q0	yes	yes	2	0.0070239	134.68	588980	246460	46143	187910	0	26757	0	40835	24438	16442
IYDTDAKSDVNQTPV	Q2G2P5	Uncharacterized protein	SAOUHSC_00201	3920357	15	3.826	1664.79	Q2G2P5	yes	yes	2	0.011438	93.478	194550	59241	12243	89328	33737	0	0	0	0	0
IYDTDAKSDVNQTPVG	Q2G2P5	Uncharacterized protein	SAOUHSC_00201	3920357	16	3.826	1721.81	Q2G2P5	yes	yes	2	0.0006074	107.82	323210	205140	35269	82804	0	0	0	0	0	0
KSSLENSMKKS	Q2G2P5	Uncharacterized protein	SAOUHSC_00201	3920357	11	10.4996	1237.63	Q2G2P5	yes	yes	3	0.0030756	126.71	159560	112320	47242	0	0	0	0	0	0	0
LLAKDGYTKE	Q2G2P5	Uncharacterized protein	SAOUHSC_00201	3920357	10	5.9475	1136.61	Q2G2P5	yes	yes	2	0.01928	110.86	225050	147670	0	77372	0	0	0	0	0	0
GVAGVRKSDQ	Q2G2M0	Tautomerase (EC 5.3.2.-)	SAOUHSC_01362	3920067	10	9.1455	1015.54	Q2G2M0	yes	yes	2	0.044432	92.538	146730	0	0	146730	0	0	0	0	0	0
HYGVAGVRKSDQ	Q2G2M0	Tautomerase (EC 5.3.2.-)	SAOUHSC_01362	3920067	12	8.7791	1315.66	Q2G2M0	yes	yes	3	0.0016489	120.09	511950	481330	30620	0	0	0	0	0	0	0
VAGVRKSDQ	Q2G2M0	Tautomerase (EC 5.3.2.-)	SAOUHSC_01362	3920067	9	9.1455	958.52	Q2G2M0	yes	yes	2	0.00093565	158.76	957770	0	0	957770	0	0	0	0	0	0
MGVFSMISSDSQAMGR	Q2G2K5	Urease subunit alpha (EC 3.5.1.5) (Urea amidohydrolase subunit alpha)	ureC SAOUHSC_02561	3921558	16	5.79	1702.75	Q2G2K5	yes	yes	2	0.050148	33.147	40043	0	40043	0	0	0	0	0	0	0
VMITHHLNAAIPE	Q2G2K5	Urease subunit alpha (EC 3.5.1.5) (Urea amidohydrolase subunit alpha)	ureC SAOUHSC_02561	3921558	13	6.4361	1444.75	Q2G2K5	yes	yes	2	0.0075691	96.604	126860	0	0	126860	0	0	0	0	0	0
MTDMMTKKGK	Q2G2J9	Uncharacterized protein	SAOUHSC_01412	3920644	10	10.4996	1169.56	Q2G2J9	yes	yes	2	0.02889	53.327	0	0	0	0	0	0	0	0	0	0
ASQAAGYNFIH	Q2G2J2	Staphylococcal secretory antigen ssaA2	ssaA2 SAOUHSC_02571	3921568	11	6.9995	1177.55	Q2G2J2	yes	yes	2	0.00047137	143.5	2143300	493080	629190	745610	13027	0	0	105170	81560	75679
ASYSTSSNNVQVT	Q2G2J2	Staphylococcal secretory antigen ssaA2	ssaA2 SAOUHSC_02571	3921568	13	5.5494	1356.62	Q2G2J2	yes	yes	2	9.531e-05	130.56	377430	29744	130180	102880	0	0	0	0	78189	36448
ASYSTSSNNVQVTTT	Q2G2J2	Staphylococcal secretory antigen ssaA2	ssaA2 SAOUHSC_02571	3921568	15	5.5494	1558.71	Q2G2J2	yes	yes	2	0.0012581	105.14	552640	67608	157660	184040	0	0	0	58567	51989	32774
SASQAAGYNFIH	Q2G2J2	Staphylococcal secretory antigen ssaA2	ssaA2 SAOUHSC_02571	3921568	12	6.9995	1264.58	Q2G2J2	yes	yes	2	0.0016765	119.74	167500	57783	65911	34885	0	0	0	8920.1	0	0
SEQDNYGYNPN	Q2G2J2	Staphylococcal secretory antigen ssaA2	ssaA2 SAOUHSC_02571	3921568	11	3.55	1299.5	Q2G2J2	yes	yes	2	0.01699	101.93	275150	27000	53958	52022	0	36370	28833	14887	51757	10324
SEQDNYGYNPND	Q2G2J2	Staphylococcal secretory antigen ssaA2	ssaA2 SAOUHSC_02571	3921568	12	3.38	1414.53	Q2G2J2	yes	yes	2	2.4018e-05	151.7	669310	57035	60190	153800	104530	57624	51222	36978	113700	34228
SYNTNSYRTGGLG	Q2G2J2	Staphylococcal secretory antigen ssaA2	ssaA2 SAOUHSC_02571	3921568	13	8.6413	1388.63	Q2G2J2	yes	yes	2	1.6329e-35	133.15	0	0	0	0	0	0	0	0	0	0
TNSYRTGGLG	Q2G2J2	Staphylococcal secretory antigen ssaA2	ssaA2 SAOUHSC_02571	3921568	10	8.799	1024.49	Q2G2J2	yes	yes	2	3.1349e-05	160.53	2211700	213660	1001800	405520	25439	45854	0	143480	195830	180160
TSSNNVQVTTTM	Q2G2J2	Staphylococcal secretory antigen ssaA2	ssaA2 SAOUHSC_02571	3921568	12	5.55	1281.59	Q2G2J2	yes	yes	2	1.8836e-11	178.71	552580	57601	200430	199100	0	0	0	42576	21845	31035
YGPGVVTSRT	Q2G2J2	Staphylococcal secretory antigen ssaA2	ssaA2 SAOUHSC_02571	3921568	10	8.799	1035.53	Q2G2J2	yes	yes	2	0.04067	94.309	360740	76519	172680	111550	0	0	0	0	0	0
YGPGVVTSRTIS	Q2G2J2	Staphylococcal secretory antigen ssaA2	ssaA2 SAOUHSC_02571	3921568	12	8.799	1235.65	Q2G2J2	yes	yes	2	0.0048871	107.97	295510	142480	153040	0	0	0	0	0	0	0
YGPGVVTSRTISAS	Q2G2J2	Staphylococcal secretory antigen ssaA2	ssaA2 SAOUHSC_02571	3921568	14	8.799	1393.72	Q2G2J2	yes	yes	2	0.048204	69.345	35052	0	35052	0	0	0	0	0	0	0
SYIQTRSGQ	Q2G2I1	Membrane-associated protein TcaA	tcaA SAOUHSC_02635	3921412	9	8.799	1038.51	Q2G2I1	yes	yes	2	0.0026067	145.99	279710	213400	66308	0	0	0	0	0	0	0
VIAEANKVTPIGN	Q2G2I1	Membrane-associated protein TcaA	tcaA SAOUHSC_02635	3921412	13	5.8613	1324.74	Q2G2I1	yes	yes	2	1.284e-20	186.16	1518000	365220	110850	453550	55031	96121	62525	31214	215390	128080
YIQTRSGQ	Q2G2I1	Membrane-associated protein TcaA	tcaA SAOUHSC_02635	3921412	8	8.799	951.477	Q2G2I1	yes	yes	2	1.645e-45	161.79	0	0	0	0	0	0	0	0	0	0
LTNYKSSKGPD	Q2G2G0	Uncharacterized protein	SAOUHSC_00717	3919344	11	8.7213	1208.6	Q2G2G0	yes	yes	2	4.0812e-05	153.74	372020	283200	6720.2	82098	0	0	0	0	0	0
NYKSSKGPDLYV	Q2G2G0	Uncharacterized protein	SAOUHSC_00717	3919344	12	8.5992	1369.69	Q2G2G0	yes	yes	2	0.0014411	122.7	108170	58165	14449	35552	0	0	0	0	0	0
TVEGKAEIKNG	Q2G2G0	Uncharacterized protein	SAOUHSC_00717	3919344	11	5.9861	1144.61	Q2G2G0	yes	yes	2	0.00506	118.9	127180	127180	0	0	0	0	0	0	0	0
YLTKNGDIKNGKEIA	Q2G2G0	Uncharacterized protein	SAOUHSC_00717	3919344	15	8.6905	1662.89	Q2G2G0	yes	yes	3	0.0056943	95.631	351000	351000	0	0	0	0	0	0	0	0
NDAKQQIAEQIQ	Q2G2F0	Uncharacterized protein	SAOUHSC_01968	3920445	12	4.184	1384.69	Q2G2F0	yes	yes	2	0.00014147	139.78	255620	127560	42146	85914	0	0	0	0	0	0
VSVETNVEKESE	Q2G2D2	Transcription termination/antitermination protein NusA	nusA SAOUHSC_01243	3920268	12	3.8195	1348.64	Q2G2D2	yes	yes	2	4.4172e-07	155.86	519230	69464	246730	184410	0	0	0	0	18634	0
AQMTMVQAIN	Q2G2A5	Pyruvate dehydrogenase complex, E1 component, pyruvate dehydrogenase beta subunit, putative (EC 1.2.4.1)	SAOUHSC_01041	3919889	10	5.55	1105.53	Q2G2A5	yes	yes	2	0.003247	133.81	1931300	221540	375080	326630	345830	252840	162080	130230	51998	65061
AQMTMVQAIND	Q2G2A5	Pyruvate dehydrogenase complex, E1 component, pyruvate dehydrogenase beta subunit, putative (EC 1.2.4.1)	SAOUHSC_01041	3919889	11	3.7498	1220.55	Q2G2A5	yes	yes	2	4.5013e-10	186.17	2361100	373150	290950	248650	235900	356750	193940	239410	216400	205910
SGGTKTAPVTIR	Q2G2A5	Pyruvate dehydrogenase complex, E1 component, pyruvate dehydrogenase beta subunit, putative (EC 1.2.4.1)	SAOUHSC_01041	3919889	12	11.6501	1186.67	Q2G2A5	yes	yes	3	0.012971	97.911	278160	278160	0	0	0	0	0	0	0	0
NPELLLMEG	Q2G2A4	Dihydrolipoamide acetyltransferase component of pyruvate dehydrogenase complex (EC 2.3.1.-)	SAOUHSC_01042	3919890	9	3.6135	1014.51	Q2G2A4	yes	yes	2	0.011755	128.38	609450	100760	70608	157340	64630	79824	39948	37946	29033	29355
MSQYAEMSLVYDQ	Q2G2A0	Uncharacterized protein	SAOUHSC_01694	3921806	13	3.55	1563.66	Q2G2A0	yes	yes	3	0.01051	25.014	0	0	0	0	0	0	0	0	0	0
SQYAEMSLVYDQLT	Q2G2A0	Uncharacterized protein	SAOUHSC_01694	3921806	14	3.55	1646.75	Q2G2A0	yes	yes	2	0.044539	47.712	998310	369260	88372	161570	49304	210060	40366	35144	24960	19265
VTDDGHAIGLF	Q2G296	Formate--tetrahydrofolate ligase (EC 6.3.4.3) (Formyltetrahydrofolate synthetase) (FHS) (FTHFS)	fhs SAOUHSC_01845	3920524	11	4.1063	1143.56	Q2G296	yes	yes	2	0.0023481	130.66	1485600	611170	119450	189960	87760	272310	51105	71321	50666	31857
AGSFLIIHQGEQ	Q2G276	Uncharacterized protein	SAOUHSC_00003	3919176	12	5.3422	1298.66	Q2G276	yes	yes	2	6.1052e-05	147.24	398320	125440	0	88139	33358	108150	18186	18792	6257	0
SDVNNTDNYG	Q2G274	DNA gyrase subunit B (EC 5.99.1.3)	gyrB SAOUHSC_00005	3919178	10	3.4918	1097.43	Q2G274	yes	yes	2	0.0041066	125.97	472180	277660	28059	157280	0	0	0	9182.6	0	0
DTTSMNVSNKQSQNVQN	Q2G260	Uncharacterized protein SAOUHSC_00094	SAOUHSC_00094	3919805	17	5.7899	1893.85	Q2G260	yes	yes	2	6.3473e-10	134.25	477370	0	0	0	110390	250470	116510	0	0	0
MSKYSQDVL	Q2G258	Bifunctional ligase/repressor BirA (Biotin--[acetyl-CoA-carboxylase] ligase) (EC 6.3.4.15) (Biotin--protein ligase) (Biotin-[acetyl-CoA carboxylase] synthetase)	birA SAOUHSC_01473	3919915	9	5.7894	1069.51	Q2G258	yes	yes	2	0.033611	49.715	2593900	806250	621290	784220	77797	73860	37871	77514	89837	25252
ANNVATDANHSYT	Q2G247	UPF0478 protein SAOUHSC_01855	SAOUHSC_01855	3920533	13	5.2713	1376.6	Q2G247	yes	yes	2	1.4066e-33	219.43	1152600	1062200	0	0	0	0	0	90451	0	0
AVKGIGDSV	Q2G247	UPF0478 protein SAOUHSC_01855	SAOUHSC_01855	3920533	9	5.7899	844.465	Q2G247	yes	yes	2	0.025128	115.7	175930	96817	0	41196	0	0	22102	0	15811	0
AVKGIGDSVQTLN	Q2G247	UPF0478 protein SAOUHSC_01855	SAOUHSC_01855	3920533	13	5.7899	1300.7	Q2G247	yes	yes	2	0.00046458	112.08	1565300	1199400	225770	0	0	0	73322	0	66749	0
DAVKGIGDSVQTLN	Q2G247	UPF0478 protein SAOUHSC_01855	SAOUHSC_01855	3920533	14	4.109	1415.73	Q2G247	yes	yes	2	2.0734e-05	115.06	154430	54657	2984.9	56928	0	39858	0	0	0	0
NVATDANHSYT	Q2G247	UPF0478 protein SAOUHSC_01855	SAOUHSC_01855	3920533	11	5.2713	1191.52	Q2G247	yes	yes	2	7.9173e-08	174.4	3537100	3322300	0	214830	0	0	0	0	0	0
SSVDRVTNSI	Q2G247	UPF0478 protein SAOUHSC_01855	SAOUHSC_01855	3920533	10	5.79	1076.55	Q2G247	yes	yes	2	0.02626	104.82	71364	71364	0	0	0	0	0	0	0	0
LHNDLYQINMAESYWN	Q2G235	Nicotinate phosphoribosyltransferase (EC 6.3.4.21)	SAOUHSC_02133	3921203	16	4.1808	2009.89	Q2G235	yes	yes	2	0.037881	49.216	86353	0	0	0	0	0	0	0	86353	0
DFDDRLPEL	Q2G227	Phosphopentomutase (EC 5.4.2.7) (Phosphodeoxyribomutase)	deoB SAOUHSC_00101	3919810	9	3.6989	1118.52	Q2G227	yes	yes	2	0.0086843	104.2	0	0	0	0	0	0	0	0	0	0
NDPTAPGTDHT	Q2G227	Phosphopentomutase (EC 5.4.2.7) (Phosphodeoxyribomutase)	deoB SAOUHSC_00101	3919810	11	4.1063	1124.47	Q2G227	yes	yes	2	0.0066987	112.75	1362600	0	84896	67494	316330	380980	435900	77017	0	0
IMAEAEELK	Q2G218	L-lactate dehydrogenase 1 (L-LDH 1) (EC 1.1.1.27)	ldh1 SAOUHSC_00206	3920362	9	3.9798	1032.52	Q2G218	yes	yes	2	0.0019371	149.72	2264100	0	172740	581720	270270	619220	213330	110610	142520	153730
ASIIGEHGDTELA	Q2G1Y5	L-lactate dehydrogenase 2 (L-LDH 2) (EC 1.1.1.27)	ldh2 SAOUHSC_02922	3921373	13	3.9262	1311.63	Q2G1Y5	yes	yes	2	0.017097	93.345	198480	164850	0	33626	0	0	0	0	0	0
VAPSSVDASIIG	Q2G1Y5	L-lactate dehydrogenase 2 (L-LDH 2) (EC 1.1.1.27)	ldh2 SAOUHSC_02922	3921373	12	3.7498	1114.59	Q2G1Y5	yes	yes	2	0.010182	101.38	1300100	849620	164870	259740	0	0	0	25854	0	0
ADSDINIKT	Q2G1X0	Alpha-hemolysin (Alpha-HL) (Alpha-toxin)	hly hla SAOUHSC_01121	3920722	9	4.109	975.487	Q2G1X0	yes	yes	2	3.7955e-97	185.81	0	0	0	0	0	0	0	0	0	0
SILMNPVANA	Q2G1X0	Alpha-hemolysin (Alpha-HL) (Alpha-toxin)	hly hla SAOUHSC_01121	3920722	10	5.55	1028.53	Q2G1X0	yes	yes	2	0.0021506	142.43	322480	29390	0	17339	49188	124790	55075	46697	0	0
DAPSDTTIKEAA	Q2G1U1	Fibronectin-binding protein A-related	SAOUHSC_01175	3920926	12	3.8759	1217.58	Q2G1U1	yes	yes	2	0.0022591	112.43	159700	117360	0	42340	0	0	0	0	0	0
VISSDYYGKE	Q2G1T9	DNA-directed RNA polymerase subunit omega (RNAP omega subunit) (EC 2.7.7.6) (RNA polymerase omega subunit) (Transcriptase subunit omega)	rpoZ SAOUHSC_01177	3920928	10	4.184	1159.54	Q2G1T9	yes	yes	2	0.004082	126.19	280760	0	0	0	224730	0	0	33253	22778	0
ADGTAVKV	Q2G1K8	Capsular polysaccharide biosynthesis protein, putative	SAOUHSC_00114	3919823	8	5.7899	759.413	Q2G1K8	yes	yes	2	0.015723	150.05	3730900	376300	63973	0	234810	90492	103130	342880	2170200	349140
AQEVQSNIQLV	Q2G1K8	Capsular polysaccharide biosynthesis protein, putative	SAOUHSC_00114	3919823	11	3.8497	1227.65	Q2G1K8	yes	yes	2	0.0064489	113.69	172800	12768	74005	49108	26068	0	0	0	10851	0
AQEVQSNIQLVNT	Q2G1K8	Capsular polysaccharide biosynthesis protein, putative	SAOUHSC_00114	3919823	13	3.8497	1442.74	Q2G1K8	yes	yes	2	1.0833e-14	176.91	500370	47588	178490	125030	88648	18637	13093	0	28887	0
LTITNQENT	Q2G1K8	Capsular polysaccharide biosynthesis protein, putative	SAOUHSC_00114	3919823	9	3.8497	1032.51	Q2G1K8	yes	yes	2	0.00045249	172.59	173620	26902	0	20050	113710	0	0	0	12956	0
LTITNQENTQ	Q2G1K8	Capsular polysaccharide biosynthesis protein, putative	SAOUHSC_00114	3919823	10	3.8497	1160.57	Q2G1K8	yes	yes	2	4.8185e-07	176.95	333530	28369	33550	0	154840	0	62238	22798	15610	16124
MLTITNQENTQ	Q2G1K8	Capsular polysaccharide biosynthesis protein, putative	SAOUHSC_00114	3919823	11	3.8497	1291.61	Q2G1K8	yes	yes	2	0.0011872	136.96	100050	0	13860	14078	48990	0	23120	0	0	0
NIQLVNTYKE	Q2G1K8	Capsular polysaccharide biosynthesis protein, putative	SAOUHSC_00114	3919823	10	5.8607	1220.64	Q2G1K8	yes	yes	2	3.0119e-07	179.42	396530	24159	30385	0	204490	94463	22217	12795	8018.7	0
NQTKGDNPQFM	Q2G1K8	Capsular polysaccharide biosynthesis protein, putative	SAOUHSC_00114	3919823	11	5.7899	1278.57	Q2G1K8	yes	yes	2	0.0017517	133.89	946920	111860	140020	400460	149470	42580	26683	17836	58020	0
NQTKGDNPQFMA	Q2G1K8	Capsular polysaccharide biosynthesis protein, putative	SAOUHSC_00114	3919823	12	5.7899	1349.6	Q2G1K8	yes	yes	2	5.4594e-11	169.65	5409400	87652	802700	1345200	1660200	545690	521490	204700	241720	0
QEVQSNIQLV	Q2G1K8	Capsular polysaccharide biosynthesis protein, putative	SAOUHSC_00114	3919823	10	3.8497	1156.61	Q2G1K8	yes	yes	2	0.0027923	137.95	987060	90000	314770	173610	201300	60986	52511	13651	80232	0
QEVQSNIQLVNT	Q2G1K8	Capsular polysaccharide biosynthesis protein, putative	SAOUHSC_00114	3919823	12	3.8497	1371.7	Q2G1K8	yes	yes	2	5.2958e-26	215.08	1702500	129010	411520	315600	531060	121550	66041	13720	114010	0
QTKGDNPQFMA	Q2G1K8	Capsular polysaccharide biosynthesis protein, putative	SAOUHSC_00114	3919823	11	5.7899	1235.56	Q2G1K8	yes	yes	2	6.3581e-06	156.83	1212000	97312	119660	280580	344360	145400	115680	54787	54239	0
PNQPDTYFLEV	Q2G1K3	Capsular polysaccharide synthesis enzyme Cap8F	SAOUHSC_00119	3919828	11	3.55	1321.62	Q2G1K3	yes	yes	2	0.0020544	132.25	123500	7989.1	0	0	0	115510	0	0	0	0
MWVDGDKQMA	Q2G1E9	Maltodextrin-binding protein	SAOUHSC_00176	3919490	10	4.109	1179.51	Q2G1E9	yes	yes	2	0.0341	98.048	227580	128450	69540	29592	0	0	0	0	0	0
NIGQNDQLENI	Q2G1E9	Maltodextrin-binding protein	SAOUHSC_00176	3919490	11	3.55	1256.6	Q2G1E9	yes	yes	2	0.0060231	115.29	171410	47405	38594	70688	0	0	0	0	14721	0
DEETEKIFT	Q2G1D8	Formate acetyltransferase (EC 2.3.1.54) (Pyruvate formate-lyase)	pflB SAOUHSC_00187	3919501	9	3.7781	1110.51	Q2G1D8	yes	yes	2	5.5064e-07	196.88	1661600	140130	120600	337150	193510	290640	198740	53866	212100	114840
EETEKIFT	Q2G1D8	Formate acetyltransferase (EC 2.3.1.54) (Pyruvate formate-lyase)	pflB SAOUHSC_00187	3919501	8	3.9798	995.481	Q2G1D8	yes	yes	2	0.012514	168.23	1313000	147300	124630	334200	90043	123380	123100	0	226660	143720
GNNDDRVDDIAVD	Q2G1D8	Formate acetyltransferase (EC 2.3.1.54) (Pyruvate formate-lyase)	pflB SAOUHSC_00187	3919501	13	3.5449	1416.61	Q2G1D8	yes	yes	2	0.0071134	98.337	1846300	16002	84574	152010	618540	354420	214290	74271	276700	55449
GVGIDGRP	Q2G1D8	Formate acetyltransferase (EC 2.3.1.54) (Pyruvate formate-lyase)	pflB SAOUHSC_00187	3919501	8	5.79	769.408	Q2G1D8	yes	yes	2	0.041599	130.22	692890	0	0	0	0	0	0	0	516570	176320
MLETNKNHA	Q2G1D8	Formate acetyltransferase (EC 2.3.1.54) (Pyruvate formate-lyase)	pflB SAOUHSC_00187	3919501	9	7.0017	1056.5	Q2G1D8	yes	yes	2	0.00013132	180.45	1484100	449380	411840	445510	0	0	0	0	177350	0
MLETNKNHAT	Q2G1D8	Formate acetyltransferase (EC 2.3.1.54) (Pyruvate formate-lyase)	pflB SAOUHSC_00187	3919501	10	7.0017	1157.55	Q2G1D8	yes	yes	2	1.7695e-15	134.25	588780	311200	0	277580	0	0	0	0	0	0
PKYGNNDDRVDD	Q2G1D8	Formate acetyltransferase (EC 2.3.1.54) (Pyruvate formate-lyase)	pflB SAOUHSC_00187	3919501	12	4.0202	1406.61	Q2G1D8	yes	yes	3	0.008813	103.08	764730	31486	177530	170070	0	179490	109090	0	97060	0
REQQLDVISRT	Q2G1D8	Formate acetyltransferase (EC 2.3.1.54) (Pyruvate formate-lyase)	pflB SAOUHSC_00187	3919501	11	5.9483	1343.72	Q2G1D8	yes	yes	2,3	0.0097213	108.7	903710	0	0	0	0	246660	130340	292600	177790	56318
TREQQLDVISRT	Q2G1D8	Formate acetyltransferase (EC 2.3.1.54) (Pyruvate formate-lyase)	pflB SAOUHSC_00187	3919501	12	5.9483	1444.76	Q2G1D8	yes	yes	3	0.012572	98.407	214000	0	0	0	0	124640	23498	53679	0	12176
SKNNVITDEFN	Q2G1C9	Uncharacterized protein	SAOUHSC_00196	3920352	11	4.184	1279.6	Q2G1C9	yes	yes	2	0.0015519	134.98	47966	47966	0	0	0	0	0	0	0	0
TINKVTVLG	Q2G1C9	Uncharacterized protein	SAOUHSC_00196	3920352	9	9.15	943.57	Q2G1C9	yes	yes	2	0.015073	96.331	0	0	0	0	0	0	0	0	0	0
AIIRGGIADD	Q2G1C0	Ribitol-5-phosphate cytidylyltransferase 1 (EC 2.7.7.40)	tarI SAOUHSC_00225	3920300	10	4.109	999.535	Q2G1C0	yes	yes	2	3.1955e-05	160.36	1700900	150260	259200	437930	198530	273730	0	224180	116140	40935
ADAVQEQDQQLSNN	Q2G189	ESAT-6 secretion system extracellular protein A (Ess extracellular protein A)	esxA SAOUHSC_00257	3919199	14	3.38	1558.69	Q2G189	yes	yes	2	8.7057e-123	302.73	4408100	299060	408500	565070	760470	639520	521030	755000	199670	259800
ADAVQEQDQQLSNNFGLQ	Q2G189	ESAT-6 secretion system extracellular protein A (Ess extracellular protein A)	esxA SAOUHSC_00257	3919199	18	3.38	2003.92	Q2G189	yes	yes	2	2.4162e-50	200.67	107090	0	0	0	0	107090	0	0	0	0
AVQEQDQQLSNN	Q2G189	ESAT-6 secretion system extracellular protein A (Ess extracellular protein A)	esxA SAOUHSC_00257	3919199	12	3.55	1372.62	Q2G189	yes	yes	2	7.1901e-57	260.28	884650	0	0	0	152240	242490	204070	199600	0	86248
AVQEQDQQLSNNFGLQ	Q2G189	ESAT-6 secretion system extracellular protein A (Ess extracellular protein A)	esxA SAOUHSC_00257	3919199	16	3.55	1817.85	Q2G189	yes	yes	2,3	9.3132e-64	233.78	11855000	3056800	691740	2580000	1037100	3288800	780280	215980	94761	109350
DQQLSNNFGLQ	Q2G189	ESAT-6 secretion system extracellular protein A (Ess extracellular protein A)	esxA SAOUHSC_00257	3919199	11	3.7498	1262.59	Q2G189	yes	yes	2	2.28e-20	216.03	996960	242630	302280	327860	124200	0	0	0	0	0
EQDQQLSNNFGLQ	Q2G189	ESAT-6 secretion system extracellular protein A (Ess extracellular protein A)	esxA SAOUHSC_00257	3919199	13	3.55	1519.69	Q2G189	yes	yes	2	1.4646e-06	145.29	759110	169800	104370	261830	49975	69914	27791	50794	7922.5	16713
GEIAANWEGQA	Q2G189	ESAT-6 secretion system extracellular protein A (Ess extracellular protein A)	esxA SAOUHSC_00257	3919199	11	3.6135	1144.51	Q2G189	yes	yes	2	0.034154	92.19	135310	0	0	0	25518	98591	11201	0	0	0
KSQSYGQGSDQIRQ	Q2G189	ESAT-6 secretion system extracellular protein A (Ess extracellular protein A)	esxA SAOUHSC_00257	3919199	14	8.7564	1580.75	Q2G189	yes	yes	3	3.061e-10	151.99	448120	180360	68201	0	0	0	53351	90754	55462	0
LEEIKQQLN	Q2G189	ESAT-6 secretion system extracellular protein A (Ess extracellular protein A)	esxA SAOUHSC_00257	3919199	9	4.2577	1113.6	Q2G189	yes	yes	2	0.0030164	143.7	764650	72962	40824	135030	115290	150420	106220	105600	0	38308
QDQQLSNNFGLQ	Q2G189	ESAT-6 secretion system extracellular protein A (Ess extracellular protein A)	esxA SAOUHSC_00257	3919199	12	3.7498	1390.65	Q2G189	yes	yes	2	8.5222e-20	208.27	1449700	317060	288400	296880	82555	134920	118370	145420	35908	30220
QEQDQQLSNNFGLQ	Q2G189	ESAT-6 secretion system extracellular protein A (Ess extracellular protein A)	esxA SAOUHSC_00257	3919199	14	3.55	1647.75	Q2G189	yes	yes	2	3.2587e-52	232.37	1045700	218050	130690	231230	64185	173760	71389	102350	23855	30214
QLSNNFGLQ	Q2G189	ESAT-6 secretion system extracellular protein A (Ess extracellular protein A)	esxA SAOUHSC_00257	3919199	9	5.55	1019.5	Q2G189	yes	yes	2	0.0079226	133.23	507910	94487	119820	109380	42934	46875	32958	46771	0	14681
QQLSNNFGLQ	Q2G189	ESAT-6 secretion system extracellular protein A (Ess extracellular protein A)	esxA SAOUHSC_00257	3919199	10	5.55	1147.56	Q2G189	yes	yes	2	2.9297e-09	188.87	16239000	2587000	3548900	1404100	1966700	2792600	1794100	1291300	392370	462170
STADAVQEQDQQLSNN	Q2G189	ESAT-6 secretion system extracellular protein A (Ess extracellular protein A)	esxA SAOUHSC_00257	3919199	16	3.38	1746.77	Q2G189	yes	yes	2	1.6793e-63	227.67	962810	0	87191	127270	209760	159670	141440	137480	46625	53367
STADAVQEQDQQLSNNFGLQ	Q2G189	ESAT-6 secretion system extracellular protein A (Ess extracellular protein A)	esxA SAOUHSC_00257	3919199	20	3.38	2192	Q2G189	yes	yes	3	0.0092067	104.88	171770	0	0	0	0	171770	0	0	0	0
TADAVQEQDQQLSNN	Q2G189	ESAT-6 secretion system extracellular protein A (Ess extracellular protein A)	esxA SAOUHSC_00257	3919199	15	3.38	1659.73	Q2G189	yes	yes	2	2.6618e-20	178.14	653830	38836	48780	76953	0	164660	151550	88779	38516	45760
VQEQDQQLSNN	Q2G189	ESAT-6 secretion system extracellular protein A (Ess extracellular protein A)	esxA SAOUHSC_00257	3919199	11	3.55	1301.58	Q2G189	yes	yes	2	4.7549e-40	237.68	826630	0	0	0	74285	135180	339880	177040	100240	0
VQEQDQQLSNNFGLQ	Q2G189	ESAT-6 secretion system extracellular protein A (Ess extracellular protein A)	esxA SAOUHSC_00257	3919199	15	3.55	1746.82	Q2G189	yes	yes	2	3.6235e-10	145.86	453720	102040	35416	155080	27901	83218	20975	19093	0	9999
YGQGSDQIRQ	Q2G189	ESAT-6 secretion system extracellular protein A (Ess extracellular protein A)	esxA SAOUHSC_00257	3919199	10	5.7895	1150.54	Q2G189	yes	yes	2	0.033023	67.704	0	0	0	0	0	0	0	0	0	0
AIMTREHGVNS	Q2G188	ESAT-6 secretion accessory factor EsaA	esaA SAOUHSC_00258	3919200	11	7.0019	1213.59	Q2G188	yes	yes	2	0.01388	104.82	205130	144100	61030	0	0	0	0	0	0	0
DAKTPSKISL	Q2G188	ESAT-6 secretion accessory factor EsaA	esaA SAOUHSC_00258	3919200	10	8.9961	1058.6	Q2G188	yes	yes	2	0.0015129	146.11	284430	79010	71648	133770	0	0	0	0	0	0
DSQIDQQSSMQDT	Q2G188	ESAT-6 secretion accessory factor EsaA	esaA SAOUHSC_00258	3919200	13	3.3384	1481.59	Q2G188	yes	yes	2	9.803e-80	270.79	221050	0	221050	0	0	0	0	0	0	0
DTLVNSISANKDIT	Q2G188	ESAT-6 secretion accessory factor EsaA	esaA SAOUHSC_00258	3919200	14	4.109	1489.76	Q2G188	yes	yes	2	0.045696	70.889	34299	34299	0	0	0	0	0	0	0	0
DYDNQVAQDT	Q2G188	ESAT-6 secretion accessory factor EsaA	esaA SAOUHSC_00258	3919200	10	3.3384	1167.47	Q2G188	yes	yes	2	2.482e-05	162.36	1124100	247950	424020	344430	67390	17922	22350	0	0	0
ESGLKNGGYQVM	Q2G188	ESAT-6 secretion accessory factor EsaA	esaA SAOUHSC_00258	3919200	12	5.8607	1281.6	Q2G188	yes	yes	2	3.3323e-07	159.09	1093600	196190	580920	299090	17372	0	0	0	0	0
ETIKSNDINQL	Q2G188	ESAT-6 secretion accessory factor EsaA	esaA SAOUHSC_00258	3919200	11	4.184	1273.65	Q2G188	yes	yes	2	1.416e-14	206.97	434670	151170	102760	164820	15918	0	0	0	0	0
ETIKSNDINQLTV	Q2G188	ESAT-6 secretion accessory factor EsaA	esaA SAOUHSC_00258	3919200	13	4.184	1473.77	Q2G188	yes	yes	2	0.00011965	128.08	144290	89248	23272	31769	0	0	0	0	0	0
NLTDYDNQVAQDT	Q2G188	ESAT-6 secretion accessory factor EsaA	esaA SAOUHSC_00258	3919200	13	3.3384	1495.64	Q2G188	yes	yes	2	4.847e-111	303.04	680710	130910	138110	280890	74929	41452	14421	0	0	0
NSDTFRVNT	Q2G188	ESAT-6 secretion accessory factor EsaA	esaA SAOUHSC_00258	3919200	9	5.79	1052.49	Q2G188	yes	yes	2	0.0028466	144.65	509680	93127	97215	128330	92248	33985	27587	21256	15934	0
SANSDTFRVNT	Q2G188	ESAT-6 secretion accessory factor EsaA	esaA SAOUHSC_00258	3919200	11	5.79	1210.56	Q2G188	yes	yes	2	2.3444e-20	215.72	2604800	500360	517210	1010100	280480	99796	118460	78375	0	0
SISANKDIT	Q2G188	ESAT-6 secretion accessory factor EsaA	esaA SAOUHSC_00258	3919200	9	5.7899	947.492	Q2G188	yes	yes	2	0.0079853	133.13	2634200	787010	840530	1006700	0	0	0	0	0	0
SSLINDGVKV	Q2G188	ESAT-6 secretion accessory factor EsaA	esaA SAOUHSC_00258	3919200	10	5.7899	1030.57	Q2G188	yes	yes	2	0.0082266	121.6	319970	232460	23648	63861	0	0	0	0	0	0
ATYLDDNDITKL	Q2G185	ESAT-6 secretion machinery protein EssB	essB SAOUHSC_00261	3919203	12	3.826	1380.68	Q2G185	yes	yes	2	0.0005004	135.02	123960	83610	10371	29983	0	0	0	0	0	0
MVKNHNPKNEMQDMLTPLDAEEA	Q2G185	ESAT-6 secretion machinery protein EssB	essB SAOUHSC_00261	3919203	23	4.2625	2654.21	Q2G185	yes	yes	3	0.044537	16.716	1706400	303020	365970	1037400	0	0	0	0	0	0
AAKAKPVY	Q2G170	5'-nucleotidase, lipoprotein e(P4) family	SAOUHSC_00284	3918967	8	10.2325	846.496	Q2G170	yes	yes	2	0.040667	130.77	624240	159720	464530	0	0	0	0	0	0	0
AAKAKPVYGA	Q2G170	5'-nucleotidase, lipoprotein e(P4) family	SAOUHSC_00284	3918967	10	10.2325	974.555	Q2G170	yes	yes	2	0.0040581	126.41	204020	115610	88415	0	0	0	0	0	0	0
AAKAKPVYGAKE	Q2G170	5'-nucleotidase, lipoprotein e(P4) family	SAOUHSC_00284	3918967	12	10.1022	1231.69	Q2G170	yes	yes	3	0.013573	97.163	768870	661360	107500	0	0	0	0	0	0	0
AIKQFDPKT	Q2G170	5'-nucleotidase, lipoprotein e(P4) family	SAOUHSC_00284	3918967	9	8.9961	1046.58	Q2G170	yes	yes	2	0.0013407	153.05	4640700	3224200	462030	954410	0	0	0	0	0	0
APQTTNSTAFAKSSAEVQ	Q2G170	5'-nucleotidase, lipoprotein e(P4) family	SAOUHSC_00284	3918967	18	5.8613	1836.89	Q2G170	yes	yes	2	6.0337e-05	116.29	77314	0	0	77314	0	0	0	0	0	0
ASIPASQKA	Q2G170	5'-nucleotidase, lipoprotein e(P4) family	SAOUHSC_00284	3918967	9	9.15	871.476	Q2G170	yes	yes	2	0.00248	146.69	1327100	847210	216850	230540	0	0	0	0	32476	0
ASIPASQKANLG	Q2G170	5'-nucleotidase, lipoprotein e(P4) family	SAOUHSC_00284	3918967	12	9.15	1155.62	Q2G170	yes	yes	2	0.005643	107.03	847660	297720	309960	239980	0	0	0	0	0	0
ASIPASQKANLGNQ	Q2G170	5'-nucleotidase, lipoprotein e(P4) family	SAOUHSC_00284	3918967	14	9.15	1397.73	Q2G170	yes	yes	2	9.8624e-35	201.48	8261400	2589900	1499300	4053900	0	53364	48833	0	15998	0
ASIPASQKANLGNQN	Q2G170	5'-nucleotidase, lipoprotein e(P4) family	SAOUHSC_00284	3918967	15	9.15	1511.77	Q2G170	yes	yes	2	6.2049e-08	133.48	1272800	442930	407290	383570	0	0	21404	0	17629	0
ASIPASQKANLGNQNIM	Q2G170	5'-nucleotidase, lipoprotein e(P4) family	SAOUHSC_00284	3918967	17	9.15	1755.89	Q2G170	yes	yes	2	5.3009e-20	161.24	454910	82557	69629	302720	0	0	0	0	0	0
AVAWYQNSAEAKA	Q2G170	5'-nucleotidase, lipoprotein e(P4) family	SAOUHSC_00284	3918967	13	5.8607	1407.68	Q2G170	yes	yes	2	4.2153e-10	163.51	125470	76863	40936	7671	0	0	0	0	0	0
AWYQNSAEAKA	Q2G170	5'-nucleotidase, lipoprotein e(P4) family	SAOUHSC_00284	3918967	11	5.8607	1237.57	Q2G170	yes	yes	2	1.1721e-20	221.32	978180	557780	0	420400	0	0	0	0	0	0
AWYQNSAEAKAL	Q2G170	5'-nucleotidase, lipoprotein e(P4) family	SAOUHSC_00284	3918967	12	5.8607	1350.66	Q2G170	yes	yes	2	0.012572	98.407	124780	93335	0	31446	0	0	0	0	0	0
DNLLDFTDPKEAT	Q2G170	5'-nucleotidase, lipoprotein e(P4) family	SAOUHSC_00284	3918967	13	3.6989	1477.69	Q2G170	yes	yes	2	0.0013502	109.44	74194	30983	8272	34939	0	0	0	0	0	0
DPKEATAESRE	Q2G170	5'-nucleotidase, lipoprotein e(P4) family	SAOUHSC_00284	3918967	11	4.1473	1231.57	Q2G170	yes	yes	2	0.0012657	136.53	6709300	888570	986110	4834600	0	0	0	0	0	0
DPKEATAESREA	Q2G170	5'-nucleotidase, lipoprotein e(P4) family	SAOUHSC_00284	3918967	12	4.1473	1302.61	Q2G170	yes	yes	2,3	0.0017551	118.76	2233100	671610	967300	594160	0	0	0	0	0	0
DPKEATAESREALIE	Q2G170	5'-nucleotidase, lipoprotein e(P4) family	SAOUHSC_00284	3918967	15	3.9868	1657.82	Q2G170	yes	yes	2	0.00012869	110.55	209470	0	0	209470	0	0	0	0	0	0
FAKSSAEVQ	Q2G170	5'-nucleotidase, lipoprotein e(P4) family	SAOUHSC_00284	3918967	9	5.8613	965.482	Q2G170	yes	yes	2	0.0065548	135.43	259080	0	203750	0	0	0	0	55332	0	0
GYNSAKTQLD	Q2G170	5'-nucleotidase, lipoprotein e(P4) family	SAOUHSC_00284	3918967	10	5.7894	1095.52	Q2G170	yes	yes	2	0.010354	119.53	460720	224640	0	236080	0	0	0	0	0	0
KSSAEVQQTQ	Q2G170	5'-nucleotidase, lipoprotein e(P4) family	SAOUHSC_00284	3918967	10	5.8613	1104.54	Q2G170	yes	yes	2	0.01441	115.57	142270	0	0	142270	0	0	0	0	0	0
KSSAEVQQTQQ	Q2G170	5'-nucleotidase, lipoprotein e(P4) family	SAOUHSC_00284	3918967	11	5.8613	1232.6	Q2G170	yes	yes	2	1.5734e-14	206.36	10659000	0	0	10659000	0	0	0	0	0	0
KSSAEVQQTQQA	Q2G170	5'-nucleotidase, lipoprotein e(P4) family	SAOUHSC_00284	3918967	12	5.8613	1303.64	Q2G170	yes	yes	2	1.5581e-45	254.18	7646500	410370	1849500	5176400	0	0	0	0	0	210140
KSSAEVQQTQQAS	Q2G170	5'-nucleotidase, lipoprotein e(P4) family	SAOUHSC_00284	3918967	13	5.8613	1390.67	Q2G170	yes	yes	2	3.2714e-26	199.8	1127600	50977	114910	961690	0	0	0	0	0	0
KSSAEVQQTQQASIPA	Q2G170	5'-nucleotidase, lipoprotein e(P4) family	SAOUHSC_00284	3918967	16	5.8613	1671.84	Q2G170	yes	yes	2	1.5148e-06	120.66	2496400	304300	325530	1091800	453430	182440	103630	0	35320	0
KSSAEVQQTQQASIPAS	Q2G170	5'-nucleotidase, lipoprotein e(P4) family	SAOUHSC_00284	3918967	17	5.8613	1758.87	Q2G170	yes	yes	2	7.9211e-10	132.81	1805600	253510	169200	1268700	0	62718	51550	0	0	0
KSSAEVQQTQQASIPASQ	Q2G170	5'-nucleotidase, lipoprotein e(P4) family	SAOUHSC_00284	3918967	18	5.8613	1886.93	Q2G170	yes	yes	2	6.868e-13	148.06	733280	80826	253280	375590	0	23591	0	0	0	0
KSSAEVQQTQQASIPASQK	Q2G170	5'-nucleotidase, lipoprotein e(P4) family	SAOUHSC_00284	3918967	19	8.9962	2015.03	Q2G170	yes	yes	3	3.7405e-12	140.35	3254500	651680	1484900	1117900	0	0	0	0	0	0
KSSAEVQQTQQASIPASQKA	Q2G170	5'-nucleotidase, lipoprotein e(P4) family	SAOUHSC_00284	3918967	20	8.9962	2086.07	Q2G170	yes	yes	3	3.9511e-13	153.06	2293800	837830	0	1370300	85604	0	0	0	0	0
KSSAEVQQTQQASIPASQKAN	Q2G170	5'-nucleotidase, lipoprotein e(P4) family	SAOUHSC_00284	3918967	21	8.9962	2200.11	Q2G170	yes	yes	3	0.00031636	118.96	4309600	1028800	1207400	1038900	201910	781580	0	0	0	50980
KSSAEVQQTQQASIPASQKANLG	Q2G170	5'-nucleotidase, lipoprotein e(P4) family	SAOUHSC_00284	3918967	23	8.9962	2370.21	Q2G170	yes	yes	3	0.0004441	111.45	2564800	875560	72031	1557300	0	59881	0	0	0	0
KSSAEVQQTQQASIPASQKANLGNQ	Q2G170	5'-nucleotidase, lipoprotein e(P4) family	SAOUHSC_00284	3918967	25	8.9962	2612.32	Q2G170	yes	yes	3	2.8424e-09	133.65	16149000	8519300	289000	6283700	0	1056800	0	0	0	0
NSAEAKALYLQ	Q2G170	5'-nucleotidase, lipoprotein e(P4) family	SAOUHSC_00284	3918967	11	5.8607	1206.62	Q2G170	yes	yes	2	5.6042e-06	158.3	2068800	253400	337860	556310	289990	295140	146790	189300	0	0
NSPYQGYASIH	Q2G170	5'-nucleotidase, lipoprotein e(P4) family	SAOUHSC_00284	3918967	11	6.9985	1235.56	Q2G170	yes	yes	2	0.016483	102.4	576350	149660	176040	250660	0	0	0	0	0	0
NSPYQGYASIHN	Q2G170	5'-nucleotidase, lipoprotein e(P4) family	SAOUHSC_00284	3918967	12	6.9985	1349.6	Q2G170	yes	yes	2	6.9441e-06	153.75	1239300	731540	71855	435930	0	0	0	0	0	0
QAAKAKPVYG	Q2G170	5'-nucleotidase, lipoprotein e(P4) family	SAOUHSC_00284	3918967	10	10.2325	1031.58	Q2G170	yes	yes	2	0.038441	95.358	116080	43658	72421	0	0	0	0	0	0	0
QASIPASQKANLGNQ	Q2G170	5'-nucleotidase, lipoprotein e(P4) family	SAOUHSC_00284	3918967	15	9.15	1525.78	Q2G170	yes	yes	2	0.002307	100.11	571930	160400	73188	338340	0	0	0	0	0	0
QQASIPASQKANLG	Q2G170	5'-nucleotidase, lipoprotein e(P4) family	SAOUHSC_00284	3918967	14	9.15	1411.74	Q2G170	yes	yes	2	0.0073846	95.273	256610	49676	86543	120390	0	0	0	0	0	0
QQASIPASQKANLGNQ	Q2G170	5'-nucleotidase, lipoprotein e(P4) family	SAOUHSC_00284	3918967	16	9.15	1653.84	Q2G170	yes	yes	2	0.0011381	104.94	516130	210800	166930	138390	0	0	0	0	0	0
QTQQASIPASQKANLGNQ	Q2G170	5'-nucleotidase, lipoprotein e(P4) family	SAOUHSC_00284	3918967	18	9.15	1882.95	Q2G170	yes	yes	3	0.0048384	96.489	293620	110010	40127	143490	0	0	0	0	0	0
SAEAKALYLQ	Q2G170	5'-nucleotidase, lipoprotein e(P4) family	SAOUHSC_00284	3918967	10	5.8607	1092.58	Q2G170	yes	yes	2	0.0025583	140.07	889330	236890	165180	487260	0	0	0	0	0	0
SAEVQQTQQASIPASQKANLGNQ	Q2G170	5'-nucleotidase, lipoprotein e(P4) family	SAOUHSC_00284	3918967	23	5.8613	2397.19	Q2G170	yes	yes	3	1.89e-13	150.23	560390	232200	30208	297990	0	0	0	0	0	0
SIPASQKANLGNQ	Q2G170	5'-nucleotidase, lipoprotein e(P4) family	SAOUHSC_00284	3918967	13	9.15	1326.69	Q2G170	yes	yes	2	0.040731	82.543	104500	0	0	104500	0	0	0	0	0	0
SWEATIYNN	Q2G170	5'-nucleotidase, lipoprotein e(P4) family	SAOUHSC_00284	3918967	9	3.8497	1096.48	Q2G170	yes	yes	2	0.0058455	136.57	209960	114350	33004	62609	0	0	0	0	0	0
VQQTQQASIPASQKANLGNQ	Q2G170	5'-nucleotidase, lipoprotein e(P4) family	SAOUHSC_00284	3918967	20	9.15	2110.08	Q2G170	yes	yes	3	0.00031224	115.31	225560	215190	10377	0	0	0	0	0	0	0
YLQGYNSAKT	Q2G170	5'-nucleotidase, lipoprotein e(P4) family	SAOUHSC_00284	3918967	10	8.6195	1143.56	Q2G170	yes	yes	2	0.0034178	132.25	594690	306690	129000	159000	0	0	0	0	0	0
GDAAGGLGGVAA	Q2G165	Uncharacterized protein	SAOUHSC_00290	3918971	12	3.7498	914.446	Q2G165	yes	yes	2	0.019446	94.692	45954	0	0	0	0	0	0	0	23866	22088
NDATGTATPIAG	Q2G165	Uncharacterized protein	SAOUHSC_00290	3918971	12	3.7498	1087.51	Q2G165	yes	yes	2	0.011262	100.04	242480	42939	30195	21985	0	0	0	0	54169	93187
RAMGALANAAIA	Q2G165	Uncharacterized protein	SAOUHSC_00290	3918971	12	10	1128.61	Q2G165	yes	yes	3	0.009955	22.917	0	0	0	0	0	0	0	0	0	0
KAIENNDMA	Q2G131	Efem/EfeO family lipoprotein	SAOUHSC_00325	3919590	9	4.184	1004.46	Q2G131	yes	yes	2	0.00084947	163.16	288330	0	0	288330	0	0	0	0	0	0
AGQGQNPARIA	Q2G124	Probable acetyl-CoA acyltransferase (EC 2.3.1.9) (Acetoacetyl-CoA thiolase)	SAOUHSC_00336	3919601	11	10	1081.56	Q2G124	yes	yes	2	0.0056954	116.52	890160	639980	0	250180	0	0	0	0	0	0
AMMLVMSEDKAKEL	Q2G124	Probable acetyl-CoA acyltransferase (EC 2.3.1.9) (Acetoacetyl-CoA thiolase)	SAOUHSC_00336	3919601	14	4.4258	1594.78	Q2G124	yes	yes	2	0.041514	51.726	21057	0	0	21057	0	0	0	0	0	0
GEDEIGDDDNDKVKA	Q2G115	Ribosome-binding ATPase YchF	ychF SAOUHSC_00346	3921819	15	3.6855	1618.7	Q2G115	yes	yes	3	0.00051102	108.72	1371800	127380	70920	221660	341110	322320	164260	51051	33697	39369
VGEDEIGDDDNDKVKA	Q2G115	Ribosome-binding ATPase YchF	ychF SAOUHSC_00346	3921819	16	3.6855	1717.76	Q2G115	yes	yes	3	0.0018065	101.3	604080	18618	23381	0	194190	222980	99384	23526	21993	0
ALLPYVKEEQ	Q2G111	30S ribosomal protein S18	rpsR SAOUHSC_00350	3921823	10	4.2577	1188.64	Q2G111	yes	yes	2	0.0027923	137.95	3536300	2706800	153750	511010	50332	86036	14792	13593	0	0
ANGITHIDYKDT	Q2G111	30S ribosomal protein S18	rpsR SAOUHSC_00350	3921823	12	5.3867	1346.65	Q2G111	yes	yes	2	0.0022591	112.43	63313	63313	0	0	0	0	0	0	0	0
LLPYVKEEQ	Q2G111	30S ribosomal protein S18	rpsR SAOUHSC_00350	3921823	9	4.2577	1117.6	Q2G111	yes	yes	2	0.042133	105.78	16168000	1957200	4066000	4073800	2470200	1164300	458460	1517300	298950	162040
ESNTNQDTNTTKDV	Q2G105	Uncharacterized protein	SAOUHSC_00356	3921829	14	3.8759	1565.68	Q2G105	yes	yes	2	5.5136e-20	179.65	20608000	6714600	8275100	3957800	1644700	0	0	0	16164	0
ESNTNQDTNTTKDVI	Q2G105	Uncharacterized protein	SAOUHSC_00356	3921829	15	3.8759	1678.76	Q2G105	yes	yes	2	5.1906e-10	142.1	407270	55300	209440	142530	0	0	0	0	0	0
ESNTNQDTNTTKDVIA	Q2G105	Uncharacterized protein	SAOUHSC_00356	3921829	16	3.8759	1749.8	Q2G105	yes	yes	2,3	1.2508e-43	203.27	201430000	38499000	71165000	43250000	32819000	4430900	3209700	3102000	4000900	955600
ESNTNQDTNTTKDVIAL	Q2G105	Uncharacterized protein	SAOUHSC_00356	3921829	17	3.8759	1862.89	Q2G105	yes	yes	2	2.5223e-45	211.75	8495200	2992200	4723700	121240	228920	300460	90017	17428	21220	0
KDVKTSPEDA	Q2G105	Uncharacterized protein	SAOUHSC_00356	3921829	10	4.3699	1088.54	Q2G105	yes	yes	2	8.2322e-07	172.27	1413900	0	547940	776850	0	0	16453	0	72700	0
KGISFENSN	Q2G105	Uncharacterized protein	SAOUHSC_00356	3921829	9	5.8613	994.472	Q2G105	yes	yes	2	1.2975e-09	202.2	1028600	554840	234710	221890	0	0	9103.5	0	8081.9	0
KSTESNTNQDTNTTKDV	Q2G105	Uncharacterized protein	SAOUHSC_00356	3921829	17	4.3699	1881.86	Q2G105	yes	yes	2,3	1.6339e-26	171.26	707470	361040	293530	52906	0	0	0	0	0	0
KSTESNTNQDTNTTKDVIA	Q2G105	Uncharacterized protein	SAOUHSC_00356	3921829	19	4.3699	2065.98	Q2G105	yes	yes	3	0.021758	91.457	8163000	1572700	4706700	1616100	0	173490	0	94005	0	0
KTSPEDAVKK	Q2G105	Uncharacterized protein	SAOUHSC_00356	3921829	10	8.9059	1101.6	Q2G105	yes	yes	3	0.0029014	136.96	133680	100870	13536	19277	0	0	0	0	0	0
LEKDDGKLVYN	Q2G105	Uncharacterized protein	SAOUHSC_00356	3921829	11	4.3699	1292.66	Q2G105	yes	yes	2,3	7.3021e-05	152.97	1280100	0	67704	0	1028800	99421	23449	0	28156	32551
LKDVKTSPEDA	Q2G105	Uncharacterized protein	SAOUHSC_00356	3921829	11	4.3699	1201.62	Q2G105	yes	yes	2	0.00029804	147.62	5171100	1473000	1256000	1224100	876220	100290	107100	55196	79194	0
NQDTNTTKDVIA	Q2G105	Uncharacterized protein	SAOUHSC_00356	3921829	12	4.109	1318.64	Q2G105	yes	yes	2	0.0010625	127.56	1250500	308870	403080	427910	50269	47017	0	13378	0	0
NQDTNTTKDVIAL	Q2G105	Uncharacterized protein	SAOUHSC_00356	3921829	13	4.109	1431.72	Q2G105	yes	yes	2	4.0438e-21	194.24	1241800	411580	369270	395740	20877	27788	16578	0	0	0
NSNGEWAYKV	Q2G105	Uncharacterized protein	SAOUHSC_00356	3921829	10	5.8607	1166.54	Q2G105	yes	yes	2	0.0079942	121.83	295990	156020	51470	88494	0	0	0	0	0	0
NTNQDTNTTKDV	Q2G105	Uncharacterized protein	SAOUHSC_00356	3921829	12	4.109	1349.61	Q2G105	yes	yes	2	2.2508e-07	162.31	1909400	0	702050	1207400	0	0	0	0	0	0
NTNQDTNTTKDVIA	Q2G105	Uncharacterized protein	SAOUHSC_00356	3921829	14	4.109	1533.73	Q2G105	yes	yes	2	2.0785e-19	169.04	26152000	8893600	8441600	5183700	1619400	776670	496650	427650	220280	92549
NTNQDTNTTKDVIAL	Q2G105	Uncharacterized protein	SAOUHSC_00356	3921829	15	4.109	1646.81	Q2G105	yes	yes	2	2.3504e-14	161.04	2517300	719830	563520	982920	100440	124520	26051	0	0	0
PKDETKSTESNTNQDTNTTKD	Q2G105	Uncharacterized protein	SAOUHSC_00356	3921829	21	4.2289	2353.05	Q2G105	yes	yes	3	4.1851e-39	194.27	1337200	370960	322770	150590	0	0	492900	0	0	0
QDTNTTKDVIA	Q2G105	Uncharacterized protein	SAOUHSC_00356	3921829	11	4.109	1204.59	Q2G105	yes	yes	2	0.006676	112.83	891170	169800	358150	194990	54443	36297	30864	22117	24503	0
QDTNTTKDVIAL	Q2G105	Uncharacterized protein	SAOUHSC_00356	3921829	12	4.109	1317.68	Q2G105	yes	yes	2	0.0020315	115.29	240970	28271	69986	131960	10749	0	0	0	0	0
QQKSGEESEVLVA	Q2G105	Uncharacterized protein	SAOUHSC_00356	3921829	13	3.9798	1402.69	Q2G105	yes	yes	2	0.00038759	115.33	230240	0	0	0	0	0	0	0	156490	73745
SFENSNGEWAYKV	Q2G105	Uncharacterized protein	SAOUHSC_00356	3921829	13	4.2577	1529.68	Q2G105	yes	yes	2	0.0003817	115.57	78341	0	0	9798.4	0	68543	0	0	0	0
TNQDTNTTKDVIA	Q2G105	Uncharacterized protein	SAOUHSC_00356	3921829	13	4.109	1419.68	Q2G105	yes	yes	2	2.4041e-05	137.84	1024400	216670	316300	246680	87976	66256	35748	30882	23845	0
TPKDETKSTESNTNQDTNTTKD	Q2G105	Uncharacterized protein	SAOUHSC_00356	3921829	22	4.2289	2454.1	Q2G105	yes	yes	3	7.1523e-13	145.52	763920	304540	99514	87583	0	0	195680	0	76593	0
TQQKSGEESEVLV	Q2G105	Uncharacterized protein	SAOUHSC_00356	3921829	13	3.9798	1432.7	Q2G105	yes	yes	2	5.1663e-05	135.02	1423800	176200	264050	494830	210890	35912	30147	0	173740	37996
EKQAETLS	Q2G0Z9	Uncharacterized protein	SAOUHSC_00362	3919781	8	4.2577	904.45	Q2G0Z9	yes	yes	2	0.041599	130.22	283750	0	0	283750	0	0	0	0	0	0
EKQAETLSHL	Q2G0Z9	Uncharacterized protein	SAOUHSC_00362	3919781	10	5.4712	1154.59	Q2G0Z9	yes	yes	2	0.026981	104.2	84284	0	0	84284	0	0	0	0	0	0
EKQAETLSHLS	Q2G0Z9	Uncharacterized protein	SAOUHSC_00362	3919781	11	5.4712	1241.63	Q2G0Z9	yes	yes	2	2.7449e-14	201.84	1869000	465190	1019700	384140	0	0	0	0	0	0
MQHKLDKQIDSQ	Q2G0Z9	Uncharacterized protein	SAOUHSC_00362	3919781	12	7.0019	1469.73	Q2G0Z9	yes	yes	3	5.5981e-09	106.29	26190000	243390	0	0	982930	207960	2681500	5146400	16928000	0
STGIHAPKSA	Q2G0Z9	Uncharacterized protein	SAOUHSC_00362	3919781	10	9.1715	967.509	Q2G0Z9	yes	yes	2	0.003022	135.86	11425000	1846000	2530600	5300200	1199300	0	400670	40900	107720	0
SYQPQNKINV	Q2G0Z9	Uncharacterized protein	SAOUHSC_00362	3919781	10	8.7571	1189.61	Q2G0Z9	yes	yes	2	0.0037898	128.86	2291100	217080	627020	1231600	0	90382	50590	13502	47200	13654
TEKQAETL	Q2G0Z9	Uncharacterized protein	SAOUHSC_00362	3919781	8	4.2577	918.466	Q2G0Z9	yes	yes	2	0.012981	153.08	926030	0	165760	760270	0	0	0	0	0	0
TEKQAETLSHL	Q2G0Z9	Uncharacterized protein	SAOUHSC_00362	3919781	11	5.4712	1255.64	Q2G0Z9	yes	yes	2,3	0.0049617	119.27	293710	0	0	293710	0	0	0	0	0	0
VNSDILDNK	Q2G0Z9	Uncharacterized protein	SAOUHSC_00362	3919781	9	4.109	1016.51	Q2G0Z9	yes	yes	2	0.0035309	140.83	361900	136870	11900	213130	0	0	0	0	0	0
VNSDILDNKYI	Q2G0Z9	Uncharacterized protein	SAOUHSC_00362	3919781	11	4.109	1292.66	Q2G0Z9	yes	yes	2	4.7664e-06	159.94	774180	439970	42138	86145	0	205930	0	0	0	0
VNSDILDNKYIM	Q2G0Z9	Uncharacterized protein	SAOUHSC_00362	3919781	12	4.109	1423.7	Q2G0Z9	yes	yes	2	0.037157	89.301	80057	43722	0	16592	0	19743	0	0	0	0
YQPQNKINVV	Q2G0Z9	Uncharacterized protein	SAOUHSC_00362	3919781	10	8.7571	1201.65	Q2G0Z9	yes	yes	2	0.036374	96.331	1874400	354040	193480	1043800	32337	80888	0	37488	74119	58302
YQPQNKINVVDVPT	Q2G0Z9	Uncharacterized protein	SAOUHSC_00362	3919781	14	5.7894	1613.84	Q2G0Z9	yes	yes	2	0.0014819	105.65	291480	246040	0	45440	0	0	0	0	0	0
SNDNAALTSH	Q2G0Z4	Uncharacterized protein	SAOUHSC_00367	3919786	10	5.2714	1028.45	Q2G0Z4	yes	yes	2	0.00039782	152.54	412380	0	0	412380	0	0	0	0	0	0
AENDSTASQSEMSEPKPQEEKKG	Q2G0Z2	Uncharacterized protein	SAOUHSC_00369	3919788	23	4.1331	2506.11	Q2G0Z2	yes	yes	4	0.00031461	115.57	2900300	1033000	138340	871370	0	734190	0	0	123330	0
GNKVTLVGEE	Q2G0Y9	Xanthine phosphoribosyltransferase (XPRTase) (EC 2.4.2.22)	xpt SAOUHSC_00372	3919791	10	4.2577	1044.55	Q2G0Y9	yes	yes	2	0.0035568	130.98	175800	130090	14736	0	30977	0	0	0	0	0
AMEKGSNDRYFQ	Q2G0Y7	Inosine-5'-monophosphate dehydrogenase (IMP dehydrogenase) (IMPD) (IMPDH) (EC 1.1.1.205)	guaB SAOUHSC_00374	3919793	12	5.9476	1444.64	Q2G0Y7	yes	yes	3	0.0064881	105.98	102090	102090	0	0	0	0	0	0	0	0
WEMTYESQLK	Q2G0W1	UPF0753 protein SAOUHSC_00413	SAOUHSC_00413	3920571	10	4.2577	1313.6	Q2G0W1	yes	yes	2	0.031835	101.9	3373000	197620	228200	516320	0	1142000	672020	411730	205060	0
MRGGGNMQQ	Q2G0T4	Nucleoid-associated protein SAOUHSC_00444	SAOUHSC_00444	24247503	9	10	977.417	Q2G0T4	yes	yes	2	0.019533	101.43	332600	102370	48154	92643	0	33430	22209	0	0	33797
MRGGGNMQQMMKQMQK	Q2G0T4	Nucleoid-associated protein SAOUHSC_00444	SAOUHSC_00444	24247503	16	11.8223	1882.85	Q2G0T4	yes	yes	2	0.045914	41.621	16016	0	0	0	0	0	0	0	0	16016
RGGGNMQQMMKQ	Q2G0T4	Nucleoid-associated protein SAOUHSC_00444	SAOUHSC_00444	24247503	12	11.6501	1364.61	Q2G0T4	yes	yes	3	0.041719	22.329	0	0	0	0	0	0	0	0	0	0
RGGGNMQQMMKQMQKM	Q2G0T4	Nucleoid-associated protein SAOUHSC_00444	SAOUHSC_00444	24247503	16	11.8223	1882.85	Q2G0T4	yes	yes	2	0.043443	52.265	47572	0	0	0	0	0	0	0	47572	0
FMRAGGSINGVMNL	Q2G0S7	Pur operon repressor	SAOUHSC_00467	3920327	14	10	1465.72	Q2G0S7	yes	yes	2	0.035466	71.176	52017	0	52017	0	0	0	0	0	0	0
ETDEVVPDKNATSEDSEEA	Q2G0S5	Putative septation protein SpoVG	spoVG SAOUHSC_00469	3920329	19	3.4176	2063.87	Q2G0S5	yes	yes	2	3.571e-64	216.26	11779000	0	0	0	0	0	0	3705100	4462900	3611400
EVVPDKNATSEDSEEA	Q2G0S5	Putative septation protein SpoVG	spoVG SAOUHSC_00469	3920329	16	3.56	1718.75	Q2G0S5	yes	yes	2	1.258e-53	216.27	60020000	4514100	3363400	3745700	15412000	8265900	4668100	9390200	6529100	4132100
KNATSEDSEEA	Q2G0S5	Putative septation protein SpoVG	spoVG SAOUHSC_00469	3920329	11	3.7781	1179.49	Q2G0S5	yes	yes	2	5.2017e-06	159.09	1879900	0	0	1879900	0	0	0	0	0	0
TDEVVPDKNATSEDSEEA	Q2G0S5	Putative septation protein SpoVG	spoVG SAOUHSC_00469	3920329	18	3.4705	1934.82	Q2G0S5	yes	yes	2	3.3226e-38	185.14	600850	0	0	0	0	0	0	226050	180320	194470
MLNNEYKN	Q2G0S2	Ribose-phosphate pyrophosphokinase (RPPK) (EC 2.7.6.1) (5-phospho-D-ribosyl alpha-1-diphosphate) (Phosphoribosyl diphosphate synthase) (Phosphoribosyl pyrophosphate synthase) (P-Rib-PP synthase) (PRPP synthase) (PRPPase)	prs SAOUHSC_00472	3920332	8	5.8607	1024.46	Q2G0S2	yes	yes	2	0.011709	162.97	3970800	271840	459060	1265000	255160	379520	383730	333680	444070	178750
AMEGEQQTEEPEVVG	Q2G0S0	50S ribosomal protein L25 (General stress protein CTC)	rplY ctc SAOUHSC_00474	3920334	15	3.2903	1631.7	Q2G0S0	yes	yes	2	3.767e-14	156.24	3831700	2030000	359930	1381100	0	0	0	60658	0	0
EAVGAKEGGVVE	Q2G0S0	50S ribosomal protein L25 (General stress protein CTC)	rplY ctc SAOUHSC_00474	3920334	12	3.9798	1143.58	Q2G0S0	yes	yes	2	0.0023048	111.86	159950	159950	0	0	0	0	0	0	0	0
EGEQQTEEPEVVG	Q2G0S0	50S ribosomal protein L25 (General stress protein CTC)	rplY ctc SAOUHSC_00474	3920334	13	3.2903	1429.62	Q2G0S0	yes	yes	2	0.0038668	104.59	387790	196160	41980	143080	0	0	0	6576.6	0	0
ESKEDEEKTEE	Q2G0S0	50S ribosomal protein L25 (General stress protein CTC)	rplY ctc SAOUHSC_00474	3920334	11	3.7857	1351.56	Q2G0S0	yes	yes	2	2.3746e-28	231.05	2522300	0	0	2522300	0	0	0	0	0	0
ITELNIND	Q2G0S0	50S ribosomal protein L25 (General stress protein CTC)	rplY ctc SAOUHSC_00474	3920334	8	3.55	930.466	Q2G0S0	yes	yes	2	0.013069	159.58	495060	90520	73908	269140	30411	0	19581	0	11502	0
MEGEQQTEEPEVVG	Q2G0S0	50S ribosomal protein L25 (General stress protein CTC)	rplY ctc SAOUHSC_00474	3920334	14	3.2903	1560.66	Q2G0S0	yes	yes	2	1.1417e-05	119.88	331740	124020	25939	161660	9904.1	10208	0	0	0	0
PEVVGESKEDEEKTEE	Q2G0S0	50S ribosomal protein L25 (General stress protein CTC)	rplY ctc SAOUHSC_00474	3920334	16	3.7141	1832.82	Q2G0S0	yes	yes	2,3	0	235.35	9106700	0	0	3873700	989550	0	2459700	0	0	1783700
SKEDEEKTEE	Q2G0S0	50S ribosomal protein L25 (General stress protein CTC)	rplY ctc SAOUHSC_00474	3920334	10	3.8735	1222.52	Q2G0S0	yes	yes	2	2.7934e-13	199.68	1563500	0	0	1563500	0	0	0	0	0	0
VTVVAPTEEPTEEE	Q2G0S0	50S ribosomal protein L25 (General stress protein CTC)	rplY ctc SAOUHSC_00474	3920334	14	3.2903	1528.71	Q2G0S0	yes	yes	2	1.7887e-19	171.05	461540	15811	73547	340430	0	18205	13551	0	0	0
VVAPTEEPTEEE	Q2G0S0	50S ribosomal protein L25 (General stress protein CTC)	rplY ctc SAOUHSC_00474	3920334	12	3.2903	1328.6	Q2G0S0	yes	yes	2	0.036584	88.596	212130	0	45164	138230	28738	0	0	0	0	0
VVTVVAPTEEPTEEE	Q2G0S0	50S ribosomal protein L25 (General stress protein CTC)	rplY ctc SAOUHSC_00474	3920334	15	3.2903	1627.78	Q2G0S0	yes	yes	2	0.02458	88.552	31574	0	0	31574	0	0	0	0	0	0
QFQKQQNEEIA	Q2G0R4	Uncharacterized protein	SAOUHSC_00482	3920340	11	4.2577	1361.66	Q2G0R4	yes	yes	2	0.0063852	113.93	1359900	593950	290300	0	77893	62813	65671	84535	113440	71301
FSDVAGADEEKQEL	Q2G0R0	ATP-dependent zinc metalloprotease FtsH (EC 3.4.24.-)	ftsH SAOUHSC_00486	3920344	14	3.6383	1536.69	Q2G0R0	yes	yes	2	0.013424	92.935	31710	31710	0	0	0	0	0	0	0	0
GPPGTGKTLLA	Q2G0R0	ATP-dependent zinc metalloprotease FtsH (EC 3.4.24.-)	ftsH SAOUHSC_00486	3920344	11	9.15	1010.58	Q2G0R0	yes	yes	2	0.0030756	126.71	699800	61228	52179	149510	0	53733	84544	205010	55436	38164
SQRTPGFSGADLEN	Q2G0R0	ATP-dependent zinc metalloprotease FtsH (EC 3.4.24.-)	ftsH SAOUHSC_00486	3920344	14	4.184	1477.68	Q2G0R0	yes	yes	2	9.7754e-05	110.84	174790	118070	0	56712	0	0	0	0	0	0
NPANPEVHELT	Q2G0Q8	Cysteine synthase (EC 2.5.1.47)	SAOUHSC_00488	3920346	11	4.2539	1219.58	Q2G0Q8	yes	yes	2	5.7107e-08	176.95	727070	209250	23415	463770	0	0	0	30628	0	0
IAEQTSETKTPSQA	Q2G0P5	ATP-dependent Clp protease ATP-binding subunit ClpC	clpC SAOUHSC_00505	3920417	14	4.2577	1489.73	Q2G0P5	yes	yes	2	1.1791e-26	186.05	5200900	654540	416750	504500	903450	982580	284520	368240	411810	674470
MGPGVKIDTA	Q2G0P0	50S ribosomal protein L1	rplA SAOUHSC_00519	3920373	10	5.7899	987.506	Q2G0P0	yes	yes	2	2.0974e-07	180.67	862280	560540	21926	279820	0	0	0	0	0	0
SIGKVSFTDE	Q2G0P0	50S ribosomal protein L1	rplA SAOUHSC_00519	3920373	10	4.184	1081.53	Q2G0P0	yes	yes	2	0.011636	118.28	1094800	618750	77369	354190	0	32758	11710	0	0	0
AAKVISGFAKD	Q2G0N9	50S ribosomal protein L10	rplJ SAOUHSC_00520	3920374	11	8.9961	1105.61	Q2G0N9	yes	yes	2	0.016343	102.53	54156	54156	0	0	0	0	0	0	0	0
AIGEQKEENAE	Q2G0N9	50S ribosomal protein L10	rplJ SAOUHSC_00520	3920374	11	3.8195	1216.56	Q2G0N9	yes	yes	2	0.00506	118.9	150160	94936	0	35511	0	0	0	19713	0	0
AKVISGFAKDH	Q2G0N9	50S ribosomal protein L10	rplJ SAOUHSC_00520	3920374	11	9.0178	1171.63	Q2G0N9	yes	yes	2	0.0068635	112.13	12574000	0	0	0	56432	6097300	5775500	0	644600	0
SAIIEAKKQLVD	Q2G0N9	50S ribosomal protein L10	rplJ SAOUHSC_00520	3920374	12	5.9481	1313.76	Q2G0N9	yes	yes	2	0.013573	97.163	537780	116760	37104	109250	0	241580	33074	0	0	0
DSGARGNASNFTQL	Q2G0N5	DNA-directed RNA polymerase subunit beta' (RNAP subunit beta') (EC 2.7.7.6) (RNA polymerase subunit beta') (Transcriptase subunit beta')	rpoC SAOUHSC_00525	3920378	14	5.79	1436.66	Q2G0N5	yes	yes	2	0.0055567	95.981	98874	89500	0	9373.5	0	0	0	0	0	0
EAVGTIAAQSIG	Q2G0N5	DNA-directed RNA polymerase subunit beta' (RNAP subunit beta') (EC 2.7.7.6) (RNA polymerase subunit beta') (Transcriptase subunit beta')	rpoC SAOUHSC_00525	3920378	12	3.8497	1115.58	Q2G0N5	yes	yes	2	0.008813	103.08	177390	122370	15534	39479	0	0	0	0	0	0
SDSGARGNASNFTQLA	Q2G0N5	DNA-directed RNA polymerase subunit beta' (RNAP subunit beta') (EC 2.7.7.6) (RNA polymerase subunit beta') (Transcriptase subunit beta')	rpoC SAOUHSC_00525	3920378	16	5.79	1594.73	Q2G0N5	yes	yes	2	0.014441	92.773	47438	47438	0	0	0	0	0	0	0	0
GEKNDIILE	Q2G0N1	Elongation factor G (EF-G)	fusA SAOUHSC_00529	3920382	9	3.9274	1029.53	Q2G0N1	yes	yes	2	0.00031681	175.91	8143000	4670800	660190	2766000	0	0	0	45915	0	0
AADGPMPQTRE	Q2G0N0	Elongation factor Tu (EF-Tu)	tuf SAOUHSC_00530	3920383	11	4.184	1171.53	Q2G0N0	yes	yes	2	0.0044064	121.36	415310	101680	91332	92044	14809	47315	35949	0	0	32174
AAIATVLAKN	Q2G0N0	Elongation factor Tu (EF-Tu)	tuf SAOUHSC_00530	3920383	10	9.15	970.581	Q2G0N0	yes	yes	2	0.00077719	150.35	289870	162910	21564	105390	0	0	0	0	0	0
AAIATVLAKNGD	Q2G0N0	Elongation factor Tu (EF-Tu)	tuf SAOUHSC_00530	3920383	12	5.7899	1142.63	Q2G0N0	yes	yes	2	6.0934e-05	147.26	63049	42437	0	20612	0	0	0	0	0	0
AAIATVLAKNGDSVA	Q2G0N0	Elongation factor Tu (EF-Tu)	tuf SAOUHSC_00530	3920383	15	5.7899	1399.77	Q2G0N0	yes	yes	2	3.4844e-14	157.2	3115900	2118900	77885	905410	0	0	0	13774	0	0
AAIATVLAKNGDSVAQ	Q2G0N0	Elongation factor Tu (EF-Tu)	tuf SAOUHSC_00530	3920383	16	5.7899	1527.83	Q2G0N0	yes	yes	2	3.0122e-06	115.8	149640	99904	0	34051	0	15683	0	0	0	0
ADGPMPQTRE	Q2G0N0	Elongation factor Tu (EF-Tu)	tuf SAOUHSC_00530	3920383	10	4.184	1100.49	Q2G0N0	yes	yes	2	3.5484e-05	123.51	914940	390940	233720	0	32230	0	0	0	258050	0
AIATVLAKNGDSVA	Q2G0N0	Elongation factor Tu (EF-Tu)	tuf SAOUHSC_00530	3920383	14	5.7899	1328.73	Q2G0N0	yes	yes	2	0.00085704	107.99	1115100	808820	103030	155090	0	0	0	28586	8725.8	10895
AKEKFDRS	Q2G0N0	Elongation factor Tu (EF-Tu)	tuf SAOUHSC_00530	3920383	8	8.994	979.509	Q2G0N0	yes	yes	2	0.01703	128.38	287020	240840	19498	8608	0	0	0	0	0	18071
AKEKFDRSKE	Q2G0N0	Elongation factor Tu (EF-Tu)	tuf SAOUHSC_00530	3920383	10	8.9045	1236.65	Q2G0N0	yes	yes	3	0.013192	97.565	673960	510970	52471	0	0	0	0	97758	12756	0
APIAIEDGTRFS	Q2G0N0	Elongation factor Tu (EF-Tu)	tuf SAOUHSC_00530	3920383	12	4.184	1275.65	Q2G0N0	yes	yes	2	0.0014709	122.33	64643	49036	0	15607	0	0	0	0	0	0
EDVQRGQVLA	Q2G0N0	Elongation factor Tu (EF-Tu)	tuf SAOUHSC_00530	3920383	10	4.184	1113.58	Q2G0N0	yes	yes	2	0.029937	101.65	99978	99978	0	0	0	0	0	0	0	0
EGGRTVGSGVVT	Q2G0N0	Elongation factor Tu (EF-Tu)	tuf SAOUHSC_00530	3920383	12	5.8614	1117.57	Q2G0N0	yes	yes	2	0.00070349	132.32	575690	575690	0	0	0	0	0	0	0	0
EMFRKLLDYAE	Q2G0N0	Elongation factor Tu (EF-Tu)	tuf SAOUHSC_00530	3920383	11	4.4258	1413.7	Q2G0N0	yes	yes	3	0.043795	37.556	163290	0	0	0	0	0	0	0	163290	0
GSALKALEGD	Q2G0N0	Elongation factor Tu (EF-Tu)	tuf SAOUHSC_00530	3920383	10	4.184	959.492	Q2G0N0	yes	yes	2	0.016404	113.63	172760	144620	0	28136	0	0	0	0	0	0
IDNAPEEKE	Q2G0N0	Elongation factor Tu (EF-Tu)	tuf SAOUHSC_00530	3920383	9	3.7781	1043.48	Q2G0N0	yes	yes	2	0.00035491	174.98	679600	311040	275620	0	0	0	0	92938	0	0
KNGDSVAQSYDMID	Q2G0N0	Elongation factor Tu (EF-Tu)	tuf SAOUHSC_00530	3920383	14	3.826	1541.67	Q2G0N0	yes	yes	2	0.00018667	110.51	107120	93384	0	13740	0	0	0	0	0	0
SALKALEGD	Q2G0N0	Elongation factor Tu (EF-Tu)	tuf SAOUHSC_00530	3920383	9	4.184	902.471	Q2G0N0	yes	yes	2	0.011332	127.76	162410	162410	0	0	0	0	0	0	0	0
SGVVTEIIK	Q2G0N0	Elongation factor Tu (EF-Tu)	tuf SAOUHSC_00530	3920383	9	5.8613	944.554	Q2G0N0	yes	yes	2	0.011018	128.27	26391000	13092000	2722400	5508800	1432200	958190	547280	982170	717660	430430
TVGSGVVTEIIK	Q2G0N0	Elongation factor Tu (EF-Tu)	tuf SAOUHSC_00530	3920383	12	5.8613	1201.69	Q2G0N0	yes	yes	2	0.011491	99.752	244640	102680	18290	52611	0	71058	0	0	0	0
TVLAKNGDSVA	Q2G0N0	Elongation factor Tu (EF-Tu)	tuf SAOUHSC_00530	3920383	11	5.7899	1073.57	Q2G0N0	yes	yes	2	0.028538	94.363	737340	426300	0	278000	0	0	0	33043	0	0
EMLNAIQNK	Q2G0M7	Protein/nucleic acid deglycase HchA (EC 3.1.2.-) (EC 3.5.1.-) (EC 3.5.1.124) (Maillard deglycase)	hchA SAOUHSC_00533	3920386	9	5.8613	1059.54	Q2G0M7	yes	yes	2	0.0013339	153.08	640280	0	58434	0	0	130130	92123	250970	61103	47532
SQDVNELSKQPTPD	Q2G0M7	Protein/nucleic acid deglycase HchA (EC 3.1.2.-) (EC 3.5.1.-) (EC 3.5.1.124) (Maillard deglycase)	hchA SAOUHSC_00533	3920386	14	3.8759	1556.73	Q2G0M7	yes	yes	2	4.9977e-43	223.39	514530	0	0	0	0	0	0	355600	77630	81298
GTYMDMMYM	Q2G0M5	Uncharacterized epimerase/dehydratase SAOUHSC_00535	SAOUHSC_00535	3920815	9	3.7498	1141.4	Q2G0M5	yes	yes	2	0.045192	11.49	3464500	0	243490	46134	1280600	584740	462530	846970	0	0
TDIREPEADSPVQ	Q2G0M5	Uncharacterized epimerase/dehydratase SAOUHSC_00535	SAOUHSC_00535	3920815	13	3.7378	1455.68	Q2G0M5	yes	yes	2	0.0074495	97.69	198140	102540	17907	77693	0	0	0	0	0	0
MDFNKENINMV	Q2G0K4	Proline/betaine transporter, putative	SAOUHSC_00556	3920601	11	4.184	1353.61	Q2G0K4	yes	yes	3	0.0096994	33.875	0	0	0	0	0	0	0	0	0	0
DNKGLDATVVT	Q2G0G1	Alcohol dehydrogenase (ADH) (EC 1.1.1.1)	adh SAOUHSC_00608	3918927	11	4.109	1131.58	Q2G0G1	yes	yes	2	0.00038915	145.46	847930	274820	129640	443480	0	0	0	0	0	0
ALAEIKQSF	Q2G0E8	Uncharacterized protein	SAOUHSC_00658	3919948	9	5.8613	1005.55	Q2G0E8	yes	yes	2	2.0581e-11	131.5	253840	0	0	92279	0	119270	42292	0	0	0
DMSSNAKLPV	Q2G0E5	Uncharacterized protein	SAOUHSC_00661	3919951	10	5.7899	1060.52	Q2G0E5	yes	yes	2	0.029557	101.97	170740	28481	43133	36092	23886	27333	0	0	11811	0
MNLPIDFNQ	Q2G0E5	Uncharacterized protein	SAOUHSC_00661	3919951	9	3.7498	1090.51	Q2G0E5	yes	yes	2	0.043396	106.6	1029000	143690	93727	0	0	313450	204540	273610	0	0
DATSKVASKTSA	Q2G0B5	Uncharacterized protein	SAOUHSC_00690	3920994	12	8.9961	1164.6	Q2G0B5	yes	yes	2	6.6253e-07	140.91	195320	195320	0	0	0	0	0	0	0	0
KSASQQNKENNTEA	Q2G0B5	Uncharacterized protein	SAOUHSC_00690	3920994	14	5.9861	1547.72	Q2G0B5	yes	yes	2,3	7.6121e-27	190.27	3211100	0	0	3211100	0	0	0	0	0	0
TDATSKVASKTSA	Q2G0B5	Uncharacterized protein	SAOUHSC_00690	3920994	13	8.9961	1265.65	Q2G0B5	yes	yes	2	0.054873	67.997	71512	71512	0	0	0	0	0	0	0	0
YVAKSASQQNKENNTEA	Q2G0B5	Uncharacterized protein	SAOUHSC_00690	3920994	17	5.9856	1880.89	Q2G0B5	yes	yes	2,3	3.9372e-20	162.81	4256300	1121100	480930	575230	0	0	0	1022600	745280	311170
SEDDLTKVLN	Q2G093	Lipoteichoic acid synthase [Cleaved into: Glycerol phosphate lipoteichoic acid synthase (LTA synthase) (EC 2.7.8.-) (Polyglycerol phosphate synthase); Processed glycerol phosphate lipoteichoic acid synthase]	ltaS yfnI SAOUHSC_00728	3920973	10	3.8759	1132.56	Q2G093	yes	yes	2	0.044277	92.611	184070	22263	18688	25304	34237	0	0	0	16048	67528
VYDGVKTIENN	Q2G093	Lipoteichoic acid synthase [Cleaved into: Glycerol phosphate lipoteichoic acid synthase (LTA synthase) (EC 2.7.8.-) (Polyglycerol phosphate synthase); Processed glycerol phosphate lipoteichoic acid synthase]	ltaS yfnI SAOUHSC_00728	3920973	11	4.184	1250.61	Q2G093	yes	yes	2	0.0028225	128.08	101250	28536	0	72717	0	0	0	0	0	0
IDRNNASL	Q2G088	Amino acid ABC transporter, permease protein, putative	SAOUHSC_00732	3920977	8	5.79	901.462	Q2G088	yes	yes	2	0.012413	153.71	602670	0	0	0	0	602670	0	0	0	0
TQQNSHGNQIQD	Q2G082	Uncharacterized protein	SAOUHSC_00738	3920983	12	5.2714	1368.6	Q2G082	yes	yes	2	0.0001201	140.14	304090	0	0	259280	0	0	0	44808	0	0
TSGEIIRKILLDES	Q2G077	Ribonucleotide-disphosphate reductase beta chain, putative (EC 1.17.4.1)	SAOUHSC_00743	3920988	14	4.4258	1572.87	Q2G077	yes	yes	2	0.0038547	96.745	197210	0	0	0	0	197210	0	0	0	0
ALNNPVLKN	Q2G071	Uncharacterized protein	SAOUHSC_00749	3919511	9	9.15	981.561	Q2G071	yes	yes	2	0.0014151	152.63	1012700	201200	238970	320880	128750	45462	41617	35852	0	0
ALNNPVLKNV	Q2G071	Uncharacterized protein	SAOUHSC_00749	3919511	10	9.15	1080.63	Q2G071	yes	yes	2	0.016325	113.71	355280	138440	56287	135870	24674	0	0	0	0	0
LNNPVLKN	Q2G071	Uncharacterized protein	SAOUHSC_00749	3919511	8	9.15	910.524	Q2G071	yes	yes	2	0.018016	147.52	344040	0	49145	0	141660	0	0	0	101190	52047
NFDKIAATKPE	Q2G071	Uncharacterized protein	SAOUHSC_00749	3919511	11	5.9481	1232.64	Q2G071	yes	yes	2,3	0.00011495	151.98	605540	531830	0	73710	0	0	0	0	0	0
NKENPDVILA	Q2G071	Uncharacterized protein	SAOUHSC_00749	3919511	10	4.184	1111.59	Q2G071	yes	yes	2	0.030825	100.88	724140	0	0	0	0	0	0	210810	308940	204390
TVEVPKNPKNA	Q2G071	Uncharacterized protein	SAOUHSC_00749	3919511	11	8.9962	1195.66	Q2G071	yes	yes	2	0.00073087	139.43	1301400	905990	49735	208010	0	51131	19354	0	67134	0
DNKSEATNLTT	Q2G067	Uncharacterized protein	SAOUHSC_00754	3919515	11	4.184	1192.56	Q2G067	yes	yes	2	0.00039678	145.28	412210	0	225890	169860	0	0	0	0	0	16470
IEKQITDINQT	Q2G067	Uncharacterized protein	SAOUHSC_00754	3919515	11	4.184	1301.68	Q2G067	yes	yes	2	3.2687e-14	199.82	417680	74144	89837	171660	37581	26391	0	0	18068	0
IEKQITDINQTNI	Q2G067	Uncharacterized protein	SAOUHSC_00754	3919515	13	4.184	1528.81	Q2G067	yes	yes	2	0.040903	84.753	93144	69757	6839.8	16548	0	0	0	0	0	0
GKYGLIQTSEQ	Q2G055	Ribosome hibernation promotion factor (HPF) (Hibernation promoting factor SaHPF)	hpf SAOUHSC_00767	3919059	11	5.8607	1222.62	Q2G055	yes	yes	2	2.6509e-20	214.26	26709000	6306700	2467800	7199900	2283400	3769200	999540	1915900	819700	946380
GAQGQATEIEIA	Q2G036	ATP-dependent Clp protease proteolytic subunit (EC 3.4.21.92) (Endopeptidase Clp)	clpP SAOUHSC_00790	3919354	12	3.6135	1186.58	Q2G036	yes	yes	2	0.00010385	142.1	331060	235410	34445	42359	0	0	0	18840	0	0
DGDKSRYLG	Q2G028	Enolase (EC 4.2.1.11) (2-phospho-D-glycerate hydro-lyase) (2-phosphoglycerate dehydratase)	eno SAOUHSC_00799	3919362	9	5.9018	1009.48	Q2G028	yes	yes	2	0.025128	115.7	2141600	1325200	36121	780320	0	0	0	0	0	0
GIKSFYNLDK	Q2G028	Enolase (EC 4.2.1.11) (2-phospho-D-glycerate hydro-lyase) (2-phosphoglycerate dehydratase)	eno SAOUHSC_00799	3919362	10	8.7213	1183.62	Q2G028	yes	yes	2,3	0.028913	102.53	684670	237550	0	0	0	447120	0	0	0	0
TAKYDGIKS	Q2G028	Enolase (EC 4.2.1.11) (2-phospho-D-glycerate hydro-lyase) (2-phosphoglycerate dehydratase)	eno SAOUHSC_00799	3919362	9	8.7213	981.513	Q2G028	yes	yes	2	0.012597	125.74	411940	281600	25258	105090	0	0	0	0	0	0
TAKYDGIKSFY	Q2G028	Enolase (EC 4.2.1.11) (2-phospho-D-glycerate hydro-lyase) (2-phosphoglycerate dehydratase)	eno SAOUHSC_00799	3919362	11	8.5992	1291.64	Q2G028	yes	yes	3	0.028538	94.363	123300	123300	0	0	0	0	0	0	0	0
TNAGQIKTGSL	Q2G028	Enolase (EC 4.2.1.11) (2-phospho-D-glycerate hydro-lyase) (2-phosphoglycerate dehydratase)	eno SAOUHSC_00799	3919362	11	9.15	1088.58	Q2G028	yes	yes	2	0.00058057	140.91	265620	166790	23514	24183	0	0	0	0	51133	0
SQTDNGVNRSGSEDPTVYS	Q2G010	Thermonuclease (EC 3.1.31.1)	SAOUHSC_00818	3919380	19	3.8759	2011.87	Q2G010	yes	yes	2	1.1106e-07	133.52	251890	0	60471	168610	0	0	0	22805	0	0
IEREDGSDVFVH	Q2G009	Uncharacterized protein	SAOUHSC_00819	3919381	12	4.1035	1401.65	Q2G009	yes	yes	3	0.0022833	112.13	419060	34961	15658	49192	33732	185890	0	76429	23201	0
IVEGDRGEQAANVVKM	Q2G009	Uncharacterized protein	SAOUHSC_00819	3919381	16	4.4258	1714.87	Q2G009	yes	yes	3	5.329e-10	128.96	586930	36194	12699	190420	0	347620	0	0	0	0
RGEQAANVVKM	Q2G009	Uncharacterized protein	SAOUHSC_00819	3919381	11	9.1456	1201.62	Q2G009	yes	yes	3	0.01699	101.93	64519	0	0	64519	0	0	0	0	0	0
VEGDRGEQAANVVKM	Q2G009	Uncharacterized protein	SAOUHSC_00819	3919381	15	4.4258	1601.78	Q2G009	yes	yes	3	4.4241e-10	143.94	889660	76925	13967	71548	0	660590	66628	0	0	0
AEKYSEMIGE	Q2FZZ8	Glycine cleavage system H protein (Octanoyl/lipoyl carrier protein)	gcvH SAOUHSC_00836	3918948	10	3.9798	1155.51	Q2FZZ8	yes	yes	2	0.0027632	138.22	4309000	2539800	517840	1176800	21337	0	0	34977	0	18195
ADESKFEQ	Q2FZY9	UPF0337 protein SAOUHSC_00845	SAOUHSC_00845	3918957	8	3.9274	952.414	Q2FZY9	yes	yes	2	2.0875e-51	279.87	5719900	469290	1032700	1292500	0	0	0	1050500	848760	1026200
ADESKFEQA	Q2FZY9	UPF0337 protein SAOUHSC_00845	SAOUHSC_00845	3918957	9	3.9274	1023.45	Q2FZY9	yes	yes	2	8.972e-10	209.6	6833300	388320	1751900	911000	0	0	0	1748600	1065900	967630
ADESKFEQAK	Q2FZY9	UPF0337 protein SAOUHSC_00845	SAOUHSC_00845	3918957	10	4.4258	1151.55	Q2FZY9	yes	yes	2	4.1248e-20	224.58	2053600	505080	22511	583340	0	0	0	622000	0	320700
ADESKFEQAKG	Q2FZY9	UPF0337 protein SAOUHSC_00845	SAOUHSC_00845	3918957	11	4.4258	1208.57	Q2FZY9	yes	yes	2,3	4.3879e-10	186.46	7283500	992760	1234400	1437400	0	0	0	1638000	1187400	793500
ADESKFEQAKGN	Q2FZY9	UPF0337 protein SAOUHSC_00845	SAOUHSC_00845	3918957	12	4.4258	1322.61	Q2FZY9	yes	yes	2,3	5.0072e-26	215.72	33833000	6323500	2402100	4804800	0	46472	0	11457000	7513700	1284900
DESKFEQAKGN	Q2FZY9	UPF0337 protein SAOUHSC_00845	SAOUHSC_00845	3918957	11	4.4258	1251.57	Q2FZY9	yes	yes	2	0.00048246	143.24	1388500	342040	0	334170	0	0	0	712320	0	0
FIDKVKGNKGE	Q2FZY9	UPF0337 protein SAOUHSC_00845	SAOUHSC_00845	3918957	11	8.9059	1233.67	Q2FZY9	yes	yes	2	0.041622	89.301	231280	109910	55014	0	0	0	0	10862	55496	0
IDKVKGNKGE	Q2FZY9	UPF0337 protein SAOUHSC_00845	SAOUHSC_00845	3918957	10	8.9059	1086.6	Q2FZY9	yes	yes	2	0.034371	97.813	78059	0	0	78059	0	0	0	0	0	0
KNLENEGKE	Q2FZY9	UPF0337 protein SAOUHSC_00845	SAOUHSC_00845	3918957	9	4.4788	1059.52	Q2FZY9	yes	yes	2	0.031009	111.06	147170	0	0	147170	0	0	0	0	0	0
NKNLENEGKE	Q2FZY9	UPF0337 protein SAOUHSC_00845	SAOUHSC_00845	3918957	10	4.4788	1173.56	Q2FZY9	yes	yes	2,3	0.016345	113.69	3889300	7246.8	82117	356100	2496300	0	0	160560	787060	0
NKNLENEGKEDK	Q2FZY9	UPF0337 protein SAOUHSC_00845	SAOUHSC_00845	3918957	12	4.5869	1416.68	Q2FZY9	yes	yes	3	0.0023228	111.63	161570	56914	40918	63741	0	0	0	0	0	0
TDNKNLENEGKE	Q2FZY9	UPF0337 protein SAOUHSC_00845	SAOUHSC_00845	3918957	12	4.1473	1389.64	Q2FZY9	yes	yes	3	0.0011223	126.76	997020	49280	94663	0	0	0	0	356470	496610	0
MTQAVKGHSLGEAMQM	Q2FZY4	Uncharacterized protein	SAOUHSC_00850	3918981	16	7.0017	1717.8	Q2FZY4	yes	yes	3	0.043506	51.546	1858800	1858800	0	0	0	0	0	0	0	0
AKKAPDVGD	Q2FZY3	UPF0051 protein SAOUHSC_00851	SAOUHSC_00851	3918982	9	5.9023	899.471	Q2FZY3	yes	yes	2	0.0017283	138.66	1122700	62528	84969	169800	257710	0	140860	249220	157620	0
INNIEAVMTNQ	Q2FZW9	D-isomer specific 2-hydroxyacid dehydrogenase, NAD binding domain protein	SAOUHSC_00866	3918996	11	3.8497	1245.6	Q2FZW9	yes	yes	2	0.0049752	119.22	3352300	0	0	0	1023800	1597200	581280	60339	47586	42085
INNIEAVMTNQV	Q2FZW9	D-isomer specific 2-hydroxyacid dehydrogenase, NAD binding domain protein	SAOUHSC_00866	3918996	12	3.8497	1344.67	Q2FZW9	yes	yes	2	0.025211	93.258	86396	0	0	8911.5	35831	41654	0	0	0	0
GAGGSTDLINA	Q2FZW3	Protein DltD	dltD SAOUHSC_00872	3919219	11	3.7498	974.467	Q2FZW3	yes	yes	2	0.0049752	119.22	326960	46758	87595	115730	22417	0	0	0	54462	0
KGEPQPEVDKPKN	Q2FZW3	Protein DltD	dltD SAOUHSC_00872	3919219	13	6.0396	1464.76	Q2FZW3	yes	yes	3	0.00025593	120.87	373180	211850	161330	0	0	0	0	0	0	0
NFDARMSQT	Q2FZW3	Protein DltD	dltD SAOUHSC_00872	3919219	9	5.79	1068.47	Q2FZW3	yes	yes	2	0.00053929	170.47	3443400	477190	228380	434480	1029100	399850	202640	117500	385940	168280
NFDARMSQTQINQ	Q2FZW3	Protein DltD	dltD SAOUHSC_00872	3919219	13	5.79	1551.71	Q2FZW3	yes	yes	2	2.0862e-06	141.37	633120	214990	41298	180600	104860	38697	11141	0	19801	21728
PQPEVDKPKN	Q2FZW3	Protein DltD	dltD SAOUHSC_00872	3919219	10	5.9481	1150.6	Q2FZW3	yes	yes	3	0.036774	96.143	384960	17396	32054	65648	0	0	70988	0	117590	81281
VLKGTLIQD	Q2FZW3	Protein DltD	dltD SAOUHSC_00872	3919219	9	5.7899	985.581	Q2FZW3	yes	yes	2	0.020035	119.75	1224600	242360	180850	255460	181080	83502	55278	43756	107400	74926
MPTEDTTMFDQV	Q2FZW2	Uncharacterized protein	SAOUHSC_00873	3919220	12	3.38	1413.58	Q2FZW2	yes	yes	3	0.0098222	27.428	0	0	0	0	0	0	0	0	0	0
AMLHGGYSNEQ	Q2FZU1	Argininosuccinate synthase (EC 6.3.4.5) (Citrulline--aspartate ligase)	argG SAOUHSC_00899	3921745	11	5.3422	1205.51	Q2FZU1	yes	yes	2	3.9807e-21	225.01	3995000	749690	417860	1367300	354490	409480	300790	0	100030	295430
QMAIMMITHDLSV	Q2FZR1	Oligopeptide ABC transporter, ATP-binding protein, putative	SAOUHSC_00929	3920758	13	5.2714	1488.71	Q2FZR1	yes	yes	2	0.043291	50.95	59900	0	0	0	0	0	0	59900	0	0
MKFISNNNITD	Q2FZN7	Lipoate--protein ligase (EC 6.3.1.20)	SAOUHSC_00963	3920674	11	5.7899	1295.62	Q2FZN7	yes	yes	2	0.0053279	119.27	620150	218890	44041	164300	0	174040	18879	0	0	0
MTHYKFYEANV	Q2FZL6	Putative 2-succinyl-6-hydroxy-2,4-cyclohexadiene-1-carboxylate synthase (SHCHC synthase) (EC 4.2.99.20)	menH SAOUHSC_00984	3920129	11	6.9998	1401.64	Q2FZL6	yes	yes	3	0.0099732	24.855	0	0	0	0	0	0	0	0	0	0
AGAVSGTGNQTFK	Q2FZK7	Bifunctional autolysin [Includes: N-acetylmuramoyl-L-alanine amidase (EC 3.5.1.28); Mannosyl-glycoprotein endo-beta-N-acetylglucosaminidase (EC 3.2.1.96)]	atl nag SAOUHSC_00994	3920394	13	9.15	1236.61	Q2FZK7	yes	yes	2	0.015756	89.301	123150	0	0	0	0	0	0	123150	0	0
ANNGVAQIKPTNS	Q2FZK7	Bifunctional autolysin [Includes: N-acetylmuramoyl-L-alanine amidase (EC 3.5.1.28); Mannosyl-glycoprotein endo-beta-N-acetylglucosaminidase (EC 3.2.1.96)]	atl nag SAOUHSC_00994	3920394	13	9.15	1312.67	Q2FZK7	yes	yes	2	0.042166	84.297	205770	88981	0	116790	0	0	0	0	0	0
ANNGVAQIKPTNSGLYT	Q2FZK7	Bifunctional autolysin [Includes: N-acetylmuramoyl-L-alanine amidase (EC 3.5.1.28); Mannosyl-glycoprotein endo-beta-N-acetylglucosaminidase (EC 3.2.1.96)]	atl nag SAOUHSC_00994	3920394	17	8.7571	1746.89	Q2FZK7	yes	yes	2	1.8096e-34	183.6	490180	224140	42847	223200	0	0	0	0	0	0
APKIEEDYT	Q2FZK7	Bifunctional autolysin [Includes: N-acetylmuramoyl-L-alanine amidase (EC 3.5.1.28); Mannosyl-glycoprotein endo-beta-N-acetylglucosaminidase (EC 3.2.1.96)]	atl nag SAOUHSC_00994	3920394	9	3.9274	1064.5	Q2FZK7	yes	yes	2	0.00058151	169.44	649500	57305	209610	382580	0	0	0	0	0	0
APTAVKPTT	Q2FZK7	Bifunctional autolysin [Includes: N-acetylmuramoyl-L-alanine amidase (EC 3.5.1.28); Mannosyl-glycoprotein endo-beta-N-acetylglucosaminidase (EC 3.2.1.96)]	atl nag SAOUHSC_00994	3920394	9	9.15	884.497	Q2FZK7	yes	yes	2	0.045481	104.2	1099800	0	444910	232610	0	0	0	78362	47336	296600
APTAVKPTTS	Q2FZK7	Bifunctional autolysin [Includes: N-acetylmuramoyl-L-alanine amidase (EC 3.5.1.28); Mannosyl-glycoprotein endo-beta-N-acetylglucosaminidase (EC 3.2.1.96)]	atl nag SAOUHSC_00994	3920394	10	9.15	971.529	Q2FZK7	yes	yes	2	0.0062679	123.51	615260	141670	189540	232360	0	0	0	0	0	51699
ASKQQQIDKSIY	Q2FZK7	Bifunctional autolysin [Includes: N-acetylmuramoyl-L-alanine amidase (EC 3.5.1.28); Mannosyl-glycoprotein endo-beta-N-acetylglucosaminidase (EC 3.2.1.96)]	atl nag SAOUHSC_00994	3920394	12	8.7213	1407.74	Q2FZK7	yes	yes	3	0.0029454	110.38	328100	0	0	328100	0	0	0	0	0	0
AVSGTGNQTFK	Q2FZK7	Bifunctional autolysin [Includes: N-acetylmuramoyl-L-alanine amidase (EC 3.5.1.28); Mannosyl-glycoprotein endo-beta-N-acetylglucosaminidase (EC 3.2.1.96)]	atl nag SAOUHSC_00994	3920394	11	9.15	1108.55	Q2FZK7	yes	yes	2	0.028272	94.465	153930	0	153930	0	0	0	0	0	0	0
FAVSKTATLG	Q2FZK7	Bifunctional autolysin [Includes: N-acetylmuramoyl-L-alanine amidase (EC 3.5.1.28); Mannosyl-glycoprotein endo-beta-N-acetylglucosaminidase (EC 3.2.1.96)]	atl nag SAOUHSC_00994	3920394	10	9.15	993.549	Q2FZK7	yes	yes	2	0.036351	96.342	281530	0	101600	179930	0	0	0	0	0	0
FAVSKTATLGNQ	Q2FZK7	Bifunctional autolysin [Includes: N-acetylmuramoyl-L-alanine amidase (EC 3.5.1.28); Mannosyl-glycoprotein endo-beta-N-acetylglucosaminidase (EC 3.2.1.96)]	atl nag SAOUHSC_00994	3920394	12	9.15	1235.65	Q2FZK7	yes	yes	2	0.0002579	138.24	101970	0	0	80214	0	0	0	21752	0	0
FSASAQPR	Q2FZK7	Bifunctional autolysin [Includes: N-acetylmuramoyl-L-alanine amidase (EC 3.5.1.28); Mannosyl-glycoprotein endo-beta-N-acetylglucosaminidase (EC 3.2.1.96)]	atl nag SAOUHSC_00994	3920394	8	10	862.43	Q2FZK7	yes	yes	2	0.012218	156.51	1004300	0	0	798190	0	0	0	206080	0	0
FSASAQPRSVA	Q2FZK7	Bifunctional autolysin [Includes: N-acetylmuramoyl-L-alanine amidase (EC 3.5.1.28); Mannosyl-glycoprotein endo-beta-N-acetylglucosaminidase (EC 3.2.1.96)]	atl nag SAOUHSC_00994	3920394	11	10	1119.57	Q2FZK7	yes	yes	2	2.1409e-14	204.17	978210	0	0	0	0	0	0	494370	166320	317520
GNNIAQGTFN	Q2FZK7	Bifunctional autolysin [Includes: N-acetylmuramoyl-L-alanine amidase (EC 3.5.1.28); Mannosyl-glycoprotein endo-beta-N-acetylglucosaminidase (EC 3.2.1.96)]	atl nag SAOUHSC_00994	3920394	10	5.55	1034.48	Q2FZK7	yes	yes	2	3.0119e-07	179.42	4237800	642420	1493400	1367100	0	0	0	384930	65570	284350
LSMVPWGTKNQ	Q2FZK7	Bifunctional autolysin [Includes: N-acetylmuramoyl-L-alanine amidase (EC 3.5.1.28); Mannosyl-glycoprotein endo-beta-N-acetylglucosaminidase (EC 3.2.1.96)]	atl nag SAOUHSC_00994	3920394	11	9.15	1259.63	Q2FZK7	yes	yes	2	0.0059466	115.57	79001	74212	0	4789.2	0	0	0	0	0	0
LVQDYNSGNKFG	Q2FZK7	Bifunctional autolysin [Includes: N-acetylmuramoyl-L-alanine amidase (EC 3.5.1.28); Mannosyl-glycoprotein endo-beta-N-acetylglucosaminidase (EC 3.2.1.96)]	atl nag SAOUHSC_00994	3920394	12	5.7894	1340.64	Q2FZK7	yes	yes	2	0.0017769	118.48	115650	36668	78983	0	0	0	0	0	0	0
NAKSPVNVM	Q2FZK7	Bifunctional autolysin [Includes: N-acetylmuramoyl-L-alanine amidase (EC 3.5.1.28); Mannosyl-glycoprotein endo-beta-N-acetylglucosaminidase (EC 3.2.1.96)]	atl nag SAOUHSC_00994	3920394	9	9.15	958.491	Q2FZK7	yes	yes	2	0.030468	111.46	262790	71882	52754	120860	0	0	0	17302	0	0
NAKSPVNVMQ	Q2FZK7	Bifunctional autolysin [Includes: N-acetylmuramoyl-L-alanine amidase (EC 3.5.1.28); Mannosyl-glycoprotein endo-beta-N-acetylglucosaminidase (EC 3.2.1.96)]	atl nag SAOUHSC_00994	3920394	10	9.15	1086.55	Q2FZK7	yes	yes	2	0.0029014	136.96	429840	63560	158500	190150	0	0	0	17629	0	0
NSYVKAGQNTL	Q2FZK7	Bifunctional autolysin [Includes: N-acetylmuramoyl-L-alanine amidase (EC 3.5.1.28); Mannosyl-glycoprotein endo-beta-N-acetylglucosaminidase (EC 3.2.1.96)]	atl nag SAOUHSC_00994	3920394	11	8.7571	1193.6	Q2FZK7	yes	yes	2	4.2474e-09	158.3	269160	0	38267	230890	0	0	0	0	0	0
QIKPTNSGLYT	Q2FZK7	Bifunctional autolysin [Includes: N-acetylmuramoyl-L-alanine amidase (EC 3.5.1.28); Mannosyl-glycoprotein endo-beta-N-acetylglucosaminidase (EC 3.2.1.96)]	atl nag SAOUHSC_00994	3920394	11	8.7571	1220.64	Q2FZK7	yes	yes	2	0.006676	112.83	489620	77094	125170	237540	0	0	0	49820	0	0
QPQNISIDKINQ	Q2FZK7	Bifunctional autolysin [Includes: N-acetylmuramoyl-L-alanine amidase (EC 3.5.1.28); Mannosyl-glycoprotein endo-beta-N-acetylglucosaminidase (EC 3.2.1.96)]	atl nag SAOUHSC_00994	3920394	12	5.7899	1396.73	Q2FZK7	yes	yes	2	0.0014709	122.33	145670	44604	31472	69598	0	0	0	0	0	0
SLNGVAQINAKNN	Q2FZK7	Bifunctional autolysin [Includes: N-acetylmuramoyl-L-alanine amidase (EC 3.5.1.28); Mannosyl-glycoprotein endo-beta-N-acetylglucosaminidase (EC 3.2.1.96)]	atl nag SAOUHSC_00994	3920394	13	9.15	1341.7	Q2FZK7	yes	yes	2	0.020141	92.247	124920	32156	40161	52599	0	0	0	0	0	0
SVSGSGNQTFK	Q2FZK7	Bifunctional autolysin [Includes: N-acetylmuramoyl-L-alanine amidase (EC 3.5.1.28); Mannosyl-glycoprotein endo-beta-N-acetylglucosaminidase (EC 3.2.1.96)]	atl nag SAOUHSC_00994	3920394	11	9.15	1110.53	Q2FZK7	yes	yes	2	0.0028618	127.87	823440	222260	299800	215850	0	0	0	85529	0	0
TAKSPVNVN	Q2FZK7	Bifunctional autolysin [Includes: N-acetylmuramoyl-L-alanine amidase (EC 3.5.1.28); Mannosyl-glycoprotein endo-beta-N-acetylglucosaminidase (EC 3.2.1.96)]	atl nag SAOUHSC_00994	3920394	9	9.15	928.498	Q2FZK7	yes	yes	2	6.9914e-07	133.13	348390	156810	146180	0	0	0	0	22134	0	23269
TAKSPVNVNQSYS	Q2FZK7	Bifunctional autolysin [Includes: N-acetylmuramoyl-L-alanine amidase (EC 3.5.1.28); Mannosyl-glycoprotein endo-beta-N-acetylglucosaminidase (EC 3.2.1.96)]	atl nag SAOUHSC_00994	3920394	13	8.7571	1393.68	Q2FZK7	yes	yes	2	9.9051e-10	156.08	595490	59584	214060	321850	0	0	0	0	0	0
TGNNIAQGTFN	Q2FZK7	Bifunctional autolysin [Includes: N-acetylmuramoyl-L-alanine amidase (EC 3.5.1.28); Mannosyl-glycoprotein endo-beta-N-acetylglucosaminidase (EC 3.2.1.96)]	atl nag SAOUHSC_00994	3920394	11	5.55	1135.53	Q2FZK7	yes	yes	2	0.0042631	121.9	315690	39994	120640	115590	0	0	0	17738	0	21732
VAGSVSGSGNQTFK	Q2FZK7	Bifunctional autolysin [Includes: N-acetylmuramoyl-L-alanine amidase (EC 3.5.1.28); Mannosyl-glycoprotein endo-beta-N-acetylglucosaminidase (EC 3.2.1.96)]	atl nag SAOUHSC_00994	3920394	14	9.15	1337.66	Q2FZK7	yes	yes	2	9.7298e-27	188.13	339670	235750	0	103920	0	0	0	0	0	0
VPAAPKKAVA	Q2FZK7	Bifunctional autolysin [Includes: N-acetylmuramoyl-L-alanine amidase (EC 3.5.1.28); Mannosyl-glycoprotein endo-beta-N-acetylglucosaminidase (EC 3.2.1.96)]	atl nag SAOUHSC_00994	3920394	10	10.8004	950.591	Q2FZK7	yes	yes	2	0.0029191	136.8	854930	66773	241460	466390	0	0	0	0	0	80310
VSKTATLGNQ	Q2FZK7	Bifunctional autolysin [Includes: N-acetylmuramoyl-L-alanine amidase (EC 3.5.1.28); Mannosyl-glycoprotein endo-beta-N-acetylglucosaminidase (EC 3.2.1.96)]	atl nag SAOUHSC_00994	3920394	10	9.15	1017.55	Q2FZK7	yes	yes	2	6.8791e-28	237.84	1464000	739780	632700	91548	0	0	0	0	0	0
VSSLNGVAQIN	Q2FZK7	Bifunctional autolysin [Includes: N-acetylmuramoyl-L-alanine amidase (EC 3.5.1.28); Mannosyl-glycoprotein endo-beta-N-acetylglucosaminidase (EC 3.2.1.96)]	atl nag SAOUHSC_00994	3920394	11	5.55	1100.58	Q2FZK7	yes	yes	2	0.010651	107.83	906950	162900	296260	372790	0	0	0	54876	0	20130
VTKEASLGGNKF	Q2FZK7	Bifunctional autolysin [Includes: N-acetylmuramoyl-L-alanine amidase (EC 3.5.1.28); Mannosyl-glycoprotein endo-beta-N-acetylglucosaminidase (EC 3.2.1.96)]	atl nag SAOUHSC_00994	3920394	12	8.9962	1249.67	Q2FZK7	yes	yes	3	0.040553	87.184	134610	134610	0	0	0	0	0	0	0	0
VTKPQTTQTVSKIA	Q2FZK7	Bifunctional autolysin [Includes: N-acetylmuramoyl-L-alanine amidase (EC 3.5.1.28); Mannosyl-glycoprotein endo-beta-N-acetylglucosaminidase (EC 3.2.1.96)]	atl nag SAOUHSC_00994	3920394	14	10.8004	1500.85	Q2FZK7	yes	yes	3	0.025906	88.101	525900	102360	166920	205870	0	0	0	50762	0	0
WVKQGDVIYN	Q2FZK7	Bifunctional autolysin [Includes: N-acetylmuramoyl-L-alanine amidase (EC 3.5.1.28); Mannosyl-glycoprotein endo-beta-N-acetylglucosaminidase (EC 3.2.1.96)]	atl nag SAOUHSC_00994	3920394	10	5.7894	1220.62	Q2FZK7	yes	yes	2	0.02583	105.2	571830	126550	157540	280360	0	0	0	7371.7	0	0
AFVDPAADPEYI	Q2FZJ9	Probable quinol oxidase subunit 2 (EC 1.10.3.-) (Quinol oxidase polypeptide II)	qoxA SAOUHSC_01002	3920402	12	3.38	1306.61	Q2FZJ9	yes	yes	2	0.01545	96.113	305600	131690	20510	58622	20299	74472	0	0	0	0
ISKDAQDQDNDDHGGGH	Q2FZJ9	Probable quinol oxidase subunit 2 (EC 1.10.3.-) (Quinol oxidase polypeptide II)	qoxA SAOUHSC_01002	3920402	17	4.1533	1807.74	Q2FZJ9	yes	yes	2,3	1.0184e-103	278.39	4489200	52585	1600100	939520	0	0	966420	0	930570	0
LDQDTFDKQ	Q2FZJ9	Probable quinol oxidase subunit 2 (EC 1.10.3.-) (Quinol oxidase polypeptide II)	qoxA SAOUHSC_01002	3920402	9	3.826	1108.5	Q2FZJ9	yes	yes	2	0.041731	105.98	403440	105130	124060	57875	0	0	23727	0	28603	64048
NFNGEGFSRQ	Q2FZJ9	Probable quinol oxidase subunit 2 (EC 1.10.3.-) (Quinol oxidase polypeptide II)	qoxA SAOUHSC_01002	3920402	10	5.8614	1154.51	Q2FZJ9	yes	yes	2	0.019829	110.38	596800	170180	99598	231970	0	38261	0	0	0	56793
SKDAQDQDNDDHGGGH	Q2FZJ9	Probable quinol oxidase subunit 2 (EC 1.10.3.-) (Quinol oxidase polypeptide II)	qoxA SAOUHSC_01002	3920402	16	4.1533	1694.65	Q2FZJ9	yes	yes	3	2.6366e-14	143.46	940180	0	114390	825790	0	0	0	0	0	0
INQTKQDIQDTLN	Q2FZI0	Uncharacterized protein	SAOUHSC_01024	3920284	13	4.109	1529.77	Q2FZI0	yes	yes	2	1.4992e-14	174.39	1207300	174610	72803	165220	97888	430170	97196	87394	53572	28410
NQTKQDIQDTLN	Q2FZI0	Uncharacterized protein	SAOUHSC_01024	3920284	12	4.109	1416.68	Q2FZI0	yes	yes	2	0.001614	120.53	351630	0	0	0	127570	154870	0	48417	0	20771
QTKQDIQDTLN	Q2FZI0	Uncharacterized protein	SAOUHSC_01024	3920284	11	4.109	1302.64	Q2FZI0	yes	yes	2	1.7847e-10	193.28	10861000	497440	700630	773290	2902200	2279500	1325800	1042000	1142200	198160
TKQDIQDTLN	Q2FZI0	Uncharacterized protein	SAOUHSC_01024	3920284	10	4.109	1174.58	Q2FZI0	yes	yes	2	0.0016569	145.28	1553400	119380	48310	0	676070	304350	284900	35442	84973	0
KDIIEDVNK	Q2FZH7	Uncharacterized protein	SAOUHSC_01027	3920287	9	4.3699	1072.58	Q2FZH7	yes	yes	2	0.0021458	148.56	369820	13819	0	0	118100	44304	106390	75937	0	11271
GSDESDAIQA	Q2FZH6	Phosphocarrier protein hpr, putative	SAOUHSC_01028	3920288	10	3.38	991.409	Q2FZH6	yes	yes	2	0.018478	111.61	436370	0	24256	27039	104610	47973	58525	64431	67273	42259
MEQNSYVIID	Q2FZH6	Phosphocarrier protein hpr, putative	SAOUHSC_01028	3920288	10	3.55	1210.55	Q2FZH6	yes	yes	2	0.022649	109.29	1216700	116250	170850	269410	84970	154580	97419	161590	88025	73608
SDESDAIQAISD	Q2FZH6	Phosphocarrier protein hpr, putative	SAOUHSC_01028	3920288	12	3.2604	1249.53	Q2FZH6	yes	yes	2	0.026481	92.19	350760	39919	72165	64645	21616	36741	27751	52073	18155	17694
VLSKEGLTK	Q2FZH6	Phosphocarrier protein hpr, putative	SAOUHSC_01028	3920288	9	8.9962	973.581	Q2FZH6	yes	yes	2	0.00058285	169.41	10436000	2073400	1553500	2276000	1582300	459640	480980	372130	758880	878900
MNDMMNLVINQ	Q2FZG7	Uncharacterized protein	SAOUHSC_01037	3919885	11	3.7498	1321.58	Q2FZG7	yes	yes	2	0.037428	38.238	67418	23266	44153	0	0	0	0	0	0	0
HPLQPHTDAVEV	Q2FZG6	Peptide deformylase (PDF) (EC 3.5.1.88) (Polypeptide deformylase)	def SAOUHSC_01038	3919886	12	5.2853	1341.67	Q2FZG6	yes	yes	2	0.01074	100.69	111950	66037	0	0	0	45916	0	0	0	0
APKLQAQFD	Q2FZG4	Pyruvate dehydrogenase E1 component subunit alpha (EC 1.2.4.1)	pdhA SAOUHSC_01040	3919888	9	5.7899	1016.53	Q2FZG4	yes	yes	2	6.0067e-06	186.16	6458100	1844800	603810	2254100	280350	454410	246600	304680	257620	211720
AQFDAVKVLN	Q2FZG4	Pyruvate dehydrogenase E1 component subunit alpha (EC 1.2.4.1)	pdhA SAOUHSC_01040	3919888	10	5.7899	1103.6	Q2FZG4	yes	yes	2	0.017942	112.13	645890	439220	74422	132240	0	0	0	0	0	0
FYAPTAGQEASQLA	Q2FZG4	Pyruvate dehydrogenase E1 component subunit alpha (EC 1.2.4.1)	pdhA SAOUHSC_01040	3919888	14	3.8497	1452.69	Q2FZG4	yes	yes	2	0.03455	84.753	75541	64703	0	10838	0	0	0	0	0	0
GQHSAEIFNHT	Q2FZG1	Uncharacterized protein	SAOUHSC_01069	3921731	11	6.4361	1239.56	Q2FZG1	yes	yes	2,3	6.4837e-06	156.58	487040	0	0	487040	0	0	0	0	0	0
NSDLAHIASN	Q2FZG1	Uncharacterized protein	SAOUHSC_01069	3921731	10	5.2714	1040.49	Q2FZG1	yes	yes	2	0.00039799	152.54	557940	68382	54238	86584	181100	46681	45248	47293	28420	0
GSYNGEEVAAK	Q2FZF1	50S ribosomal protein L32	rpmF SAOUHSC_01078		11	4.2577	1123.51	Q2FZF1	yes	yes	2	0.040319	89.805	459940	0	74714	0	0	168280	89850	0	0	127100
SYNGEEVAAK	Q2FZF1	50S ribosomal protein L32	rpmF SAOUHSC_01078		10	4.2577	1066.49	Q2FZF1	yes	yes	2	2.9051e-05	161.17	2113600	0	0	0	820320	465780	827480	0	0	0
SEQQTMSELK	Q2FZD9	Phenylalanine--tRNA ligase alpha subunit (EC 6.1.1.20) (Phenylalanyl-tRNA synthetase alpha subunit) (PheRS)	pheS SAOUHSC_01092	3919253	10	4.2577	1179.54	Q2FZD9	yes	yes	2	0.0030041	136.02	150860	82032	27844	0	40988	0	0	0	0	0
AIVKVTDAD	Q2FZD2	Thioredoxin (Trx)	trxA SAOUHSC_01100	3920742	9	4.109	930.502	Q2FZD2	yes	yes	2	1.1602e-09	203.29	5382500	548300	649150	818700	1160800	479950	388070	366670	508040	462790
AIVKVTDADFD	Q2FZD2	Thioredoxin (Trx)	trxA SAOUHSC_01100	3920742	11	3.826	1192.6	Q2FZD2	yes	yes	2	0.0001998	149.96	3545800	896890	380610	881200	184650	578690	85215	272180	133700	132620
AINNDGAKLGT	Q2FZA4	Uncharacterized protein	SAOUHSC_01135	3920734	11	5.7899	1072.55	Q2FZA4	yes	yes	2	0.0002704	148.28	774730	43232	51263	299900	55332	221870	103130	0	0	0
AAPNGGGYVKGPNP	Q2FZ94	Penicillin-binding protein 1	SAOUHSC_01145	3920705	14	8.7571	1297.64	Q2FZ94	yes	yes	2	1.2014e-09	144.57	762550	228610	116470	417470	0	0	0	0	0	0
APNGGGYVKGPNP	Q2FZ94	Penicillin-binding protein 1	SAOUHSC_01145	3920705	13	8.7571	1226.6	Q2FZ94	yes	yes	2	0.0010209	110.08	524520	176240	156900	191380	0	0	0	0	0	0
AVVMDAKTG	Q2FZ94	Penicillin-binding protein 1	SAOUHSC_01145	3920705	9	5.7899	890.453	Q2FZ94	yes	yes	2	0.0065548	135.43	236080	0	0	0	225710	0	10365	0	0	0
EILAYSQRPT	Q2FZ94	Penicillin-binding protein 1	SAOUHSC_01145	3920705	10	5.8608	1176.61	Q2FZ94	yes	yes	2	0.017708	112.36	355310	30818	213220	111270	0	0	0	0	0	0
MKANEKYLV	Q2FZ94	Penicillin-binding protein 1	SAOUHSC_01145	3920705	9	8.7213	1094.58	Q2FZ94	yes	yes	2	0.011018	128.27	404400	0	0	404400	0	0	0	0	0	0
SLAQKNDQEAYELG	Q2FZ94	Penicillin-binding protein 1	SAOUHSC_01145	3920705	14	3.9274	1564.74	Q2FZ94	yes	yes	2	0.013412	92.939	131820	53816	36164	41842	0	0	0	0	0	0
SSFGQSTTVTPV	Q2FZ94	Penicillin-binding protein 1	SAOUHSC_01145	3920705	12	5.55	1209.59	Q2FZ94	yes	yes	2	0.0018751	117.25	3311700	363410	921010	1053700	409970	195370	172280	60551	112600	22795
SSFGQSTTVTPVQM	Q2FZ94	Penicillin-binding protein 1	SAOUHSC_01145	3920705	14	5.55	1468.69	Q2FZ94	yes	yes	2	3.3251e-07	127.79	1169800	117380	315830	312880	122280	173390	68868	25855	33289	0
SSFGQSTTVTPVQML	Q2FZ94	Penicillin-binding protein 1	SAOUHSC_01145	3920705	15	5.55	1581.77	Q2FZ94	yes	yes	2	0.014656	92.65	205490	47824	32764	69238	22329	33333	0	0	0	0
TIGSGTQIKAQSI	Q2FZ94	Penicillin-binding protein 1	SAOUHSC_01145	3920705	13	9.15	1302.71	Q2FZ94	yes	yes	2	1.7195e-14	173.06	951670	59264	291530	279630	136500	40239	50594	0	93916	0
VVMDAKTGEILA	Q2FZ94	Penicillin-binding protein 1	SAOUHSC_01145	3920705	12	4.184	1245.66	Q2FZ94	yes	yes	2	1.885e-07	163.78	3159600	1052400	583100	995680	122140	244960	84367	37515	31160	8272.6
WSNELQQKT	Q2FZ94	Penicillin-binding protein 1	SAOUHSC_01145	3920705	9	5.8613	1132.55	Q2FZ94	yes	yes	2	0.022613	117.7	72329	0	0	72329	0	0	0	0	0	0
IGVSSGENRAVE	Q2FZ89	Cell division protein FtsZ	ftsZ SAOUHSC_01150	3920710	12	4.2577	1216.6	Q2FZ89	yes	yes	2	0.0044068	108.56	2015600	1044700	0	859330	62914	0	0	48650	0	0
MLEFEQGFN	Q2FZ89	Cell division protein FtsZ	ftsZ SAOUHSC_01150	3920710	9	3.6135	1113.48	Q2FZ89	yes	yes	2	0.011018	128.27	96179	27048	6442.9	0	11071	51617	0	0	0	0
SNATSKDESFT	Q2FZ89	Cell division protein FtsZ	ftsZ SAOUHSC_01150	3920710	11	4.184	1185.52	Q2FZ89	yes	yes	2	0.00012388	98.407	0	0	0	0	0	0	0	0	0	0
SNSSNAQATDSVSERT	Q2FZ89	Cell division protein FtsZ	ftsZ SAOUHSC_01150	3920710	16	4.184	1652.72	Q2FZ89	yes	yes	2	1.7489e-16	154.46	1981700	1981700	0	0	0	0	0	0	0	0
SSNATSKDESFT	Q2FZ89	Cell division protein FtsZ	ftsZ SAOUHSC_01150	3920710	12	4.184	1272.55	Q2FZ89	yes	yes	2	5.0072e-26	215.72	2335400	559980	83014	1623600	0	0	0	54830	13974	0
TLKVIGVGGGGNN	Q2FZ89	Cell division protein FtsZ	ftsZ SAOUHSC_01150	3920710	13	9.15	1184.65	Q2FZ89	yes	yes	2	0.002343	107.53	218300	155030	0	63269	0	0	0	0	0	0
TSSNATSKDESFT	Q2FZ89	Cell division protein FtsZ	ftsZ SAOUHSC_01150	3920710	13	4.184	1373.59	Q2FZ89	yes	yes	2	1.0235e-42	235.31	2736100	803930	323840	1608300	0	0	0	0	0	0
TSVNTSSNATSKDESFT	Q2FZ89	Cell division protein FtsZ	ftsZ SAOUHSC_01150	3920710	17	4.184	1774.79	Q2FZ89	yes	yes	2	1.7914e-26	170.09	2297900	1138300	239530	858190	0	0	0	61881	0	0
DEEEVEVPDKQ	Q2FZ86	Cell division protein SepF	sepF SAOUHSC_01154	3920713	11	3.56	1315.58	Q2FZ86	yes	yes	2	0.0086211	109.72	363390	16906	0	111090	0	74833	66454	26474	16092	51541
DEEEVEVPDKQQQVNEAPAKEQS	Q2FZ86	Cell division protein SepF	sepF SAOUHSC_01154	3920713	23	3.691	2625.2	Q2FZ86	yes	yes	3	7.358e-29	176.42	954820	282870	0	671950	0	0	0	0	0	0
VIDDEEEVEVPDKQ	Q2FZ86	Cell division protein SepF	sepF SAOUHSC_01154	3920713	14	3.4705	1642.76	Q2FZ86	yes	yes	2	0.0038225	96.866	188860	0	0	21057	84829	60633	14397	0	0	7946.7
ANAQNNASNTPDNNQQSNDSETTKK	Q2FZ83	Uncharacterized protein	SAOUHSC_01158	3920716	25	4.3699	2690.18	Q2FZ83	yes	yes	3	0.045564	74.048	182340	0	0	0	0	0	0	0	103860	78481
AQNNASNTPDNNQQSNDSETTKK	Q2FZ83	Uncharacterized protein	SAOUHSC_01158	3920716	23	4.3699	2505.1	Q2FZ83	yes	yes	3	1.1472e-07	133.95	1742600	0	0	0	0	0	0	0	1314500	428180
PFTPNEIKN	Q2FZ83	Uncharacterized protein	SAOUHSC_01158	3920716	9	5.8613	1058.54	Q2FZ83	yes	yes	2	0.00053929	170.47	1292900	119080	145820	231120	205890	97186	103190	180420	117860	92332
AVKFINSLEK	Q2FZ51	Acyl carrier protein (ACP)	acpP hmrB SAOUHSC_01201	3919468	10	8.9962	1147.66	Q2FZ51	yes	yes	2,3	0.0036193	130.41	3859500	1700500	105070	528380	255560	1154100	115930	0	0	0
GVDADKVTEDA	Q2FZ51	Acyl carrier protein (ACP)	acpP hmrB SAOUHSC_01201	3919468	11	3.6989	1118.51	Q2FZ51	yes	yes	2	5.7547e-05	153.34	11153000	335450	293300	753810	3953600	1908200	3648800	80846	179220	0
INTVGDAVKF	Q2FZ51	Acyl carrier protein (ACP)	acpP hmrB SAOUHSC_01201	3919468	10	5.7899	1062.57	Q2FZ51	yes	yes	2	0.0015335	145.99	163390	0	12640	0	95551	55195	0	0	0	0
LGVDADKVTEDA	Q2FZ51	Acyl carrier protein (ACP)	acpP hmrB SAOUHSC_01201	3919468	12	3.6989	1231.59	Q2FZ51	yes	yes	2	0.0029472	110.38	112380	0	8218.7	0	104160	0	0	0	0	0
MENFDKVKD	Q2FZ51	Acyl carrier protein (ACP)	acpP hmrB SAOUHSC_01201	3919468	9	4.3699	1124.52	Q2FZ51	yes	yes	2	6.2864e-06	185.61	1017400	326600	54061	85140	265690	132590	44312	31441	63318	14239
VDADKVTEDA	Q2FZ51	Acyl carrier protein (ACP)	acpP hmrB SAOUHSC_01201	3919468	10	3.6989	1061.49	Q2FZ51	yes	yes	2	0.00047944	152.07	140230	0	0	0	140230	0	0	0	0	0
ASEEGGTEIEEVA	Q2FZ37	Succinate--CoA ligase [ADP-forming] subunit beta (EC 6.2.1.5) (Succinyl-CoA synthetase subunit beta) (SCS-beta)	sucC SAOUHSC_01216	3919482	13	3.2903	1319.57	Q2FZ37	yes	yes	2	0.024556	90.653	123300	85586	18218	19496	0	0	0	0	0	0
DLEEEDPKEIE	Q2FZ37	Succinate--CoA ligase [ADP-forming] subunit beta (EC 6.2.1.5) (Succinyl-CoA synthetase subunit beta) (SCS-beta)	sucC SAOUHSC_01216	3919482	11	3.4951	1344.59	Q2FZ37	yes	yes	2	0.0021325	131.83	243310	130900	40642	71764	0	0	0	0	0	0
DSGLAIEPAATMA	Q2FZ37	Succinate--CoA ligase [ADP-forming] subunit beta (EC 6.2.1.5) (Succinyl-CoA synthetase subunit beta) (SCS-beta)	sucC SAOUHSC_01216	3919482	13	3.55	1245.59	Q2FZ37	yes	yes	2	2.1797e-06	140.78	143520	110820	16289	16412	0	0	0	0	0	0
EGAQKIVKLV	Q2FZ37	Succinate--CoA ligase [ADP-forming] subunit beta (EC 6.2.1.5) (Succinyl-CoA synthetase subunit beta) (SCS-beta)	sucC SAOUHSC_01216	3919482	10	8.9962	1083.67	Q2FZ37	yes	yes	2	0.0088569	120.99	385390	385390	0	0	0	0	0	0	0	0
EKEKSEETEATEE	Q2FZ25	30S ribosomal protein S2	rpsB SAOUHSC_01232		13	3.8119	1537.66	Q2FZ25	yes	yes	2,3	6.4186e-149	336.5	62397000	5442600	3900000	6106800	10144000	8996100	4995900	11066000	7569500	4175200
KEKSEETEATEE	Q2FZ25	30S ribosomal protein S2	rpsB SAOUHSC_01232		12	3.9033	1408.62	Q2FZ25	yes	yes	2	9.6144e-35	138.63	0	0	0	0	0	0	0	0	0	0
KSEETEATEE	Q2FZ25	30S ribosomal protein S2	rpsB SAOUHSC_01232		10	3.7064	1151.48	Q2FZ25	yes	yes	2	0.0083303	121.5	148450	0	0	148450	0	0	0	0	0	0
LDEKEKSEETEATEE	Q2FZ25	30S ribosomal protein S2	rpsB SAOUHSC_01232		15	3.7141	1765.77	Q2FZ25	yes	yes	2,3	6.0833e-294	241.42	8793300	1109100	0	868330	1252800	3762800	804450	0	845340	150510
FADEVKGQMK	Q2FZ23	Elongation factor Ts (EF-Ts)	tsf SAOUHSC_01234	3920259	10	5.9481	1151.56	Q2FZ23	yes	yes	2,3	8.3176e-31	182.46	9698800	3018100	1070200	1851200	778580	844820	1283200	443860	309410	99375
GVNPTSDGE	Q2FZ21	Ribosome-recycling factor (RRF) (Ribosome-releasing factor)	frr SAOUHSC_01236	3920261	9	3.55	874.367	Q2FZ21	yes	yes	2	0.024686	116.05	154810	0	0	0	0	0	22912	0	105450	26450
KKDEKNGDITED	Q2FZ21	Ribosome-recycling factor (RRF) (Ribosome-releasing factor)	frr SAOUHSC_01236	3920261	12	4.2289	1390.66	Q2FZ21	yes	yes	2	0.034918	89.189	42272	28744	13528	0	0	0	0	0	0	0
SDIINETK	Q2FZ21	Ribosome-recycling factor (RRF) (Ribosome-releasing factor)	frr SAOUHSC_01236	3920261	8	4.184	918.466	Q2FZ21	yes	yes	2	0.016024	149.72	1215000	98193	267060	0	69914	179580	162200	163220	180600	94274
SDIINETKS	Q2FZ21	Ribosome-recycling factor (RRF) (Ribosome-releasing factor)	frr SAOUHSC_01236	3920261	9	4.184	1005.5	Q2FZ21	yes	yes	2	0.00024053	177.78	1580900	91397	126120	85664	210680	140040	285420	103310	307840	230460
TDNSIKEID	Q2FZ21	Ribosome-recycling factor (RRF) (Ribosome-releasing factor)	frr SAOUHSC_01236	3920261	9	3.8759	1033.49	Q2FZ21	yes	yes	2	0.0079853	133.13	1837600	61236	101850	108410	0	224830	207770	92182	697580	343720
APKSLFDEE	Q2FZ09	Protein RecA (Recombinase A)	recA SAOUHSC_01262	3919993	9	3.9274	1034.49	Q2FZ09	yes	yes	2	4.367e-06	189.38	9192900	1022000	1076500	1012500	1655300	1685700	685930	1305300	377130	372530
GDVEETEDAPKSLFDEE	Q2FZ09	Protein RecA (Recombinase A)	recA SAOUHSC_01262	3919993	17	3.4176	1908.81	Q2FZ09	yes	yes	2	1.8882e-20	166.04	186070	0	0	0	0	186070	0	0	0	0
VEETEDAPKSLFDEE	Q2FZ09	Protein RecA (Recombinase A)	recA SAOUHSC_01262	3919993	15	3.4951	1736.76	Q2FZ09	yes	yes	2	0.0013808	104.55	230950	97284	0	17688	0	115980	0	0	0	0
EAQHGNNQPAVKE	Q2FYZ4	Aerobic glycerol-3-phosphate dehydrogenase (EC 1.1.5.3)	glpD SAOUHSC_01278	3919930	13	5.4712	1420.67	Q2FYZ4	yes	yes	2,3	5.1356e-10	162.31	997080	707610	199710	89757	0	0	0	0	0	0
DETYENFEK	Q2FYU7	Catalase (EC 1.11.1.6)	katA SAOUHSC_01327	3920192	9	3.7781	1173.48	Q2FYU7	yes	yes	2	1.0607e-09	204.07	2905000	371660	401860	445690	436130	330060	222370	467530	117370	112340
LETENDETYENFEK	Q2FYU7	Catalase (EC 1.11.1.6)	katA SAOUHSC_01327	3920192	14	3.5889	1759.74	Q2FYU7	yes	yes	2	1.1763e-90	271.64	2289400	639900	91287	246970	141730	795710	111590	167440	41852	52934
TENDETYENFEK	Q2FYU7	Catalase (EC 1.11.1.6)	katA SAOUHSC_01327	3920192	12	3.6718	1517.62	Q2FYU7	yes	yes	2	1.8475e-07	163.51	259890	84294	30404	62993	0	24449	0	57746	0	0
EEMLRMMMMQMGQKPSQ	Q2FYT7	UPF0154 protein SAOUHSC_01338	SAOUHSC_01338	3920202	17	5.9863	2084.9	Q2FYT7	yes	yes	2	0.03002	59.862	180300	0	52160	128140	0	0	0	0	0	0
EMLRMMMMQMGQ	Q2FYT7	UPF0154 protein SAOUHSC_01338	SAOUHSC_01338	3920202	12	5.8614	1515.62	Q2FYT7	yes	yes	3	0.042714	23.468	0	0	0	0	0	0	0	0	0	0
MMMQMGQKPSQ	Q2FYT7	UPF0154 protein SAOUHSC_01338	SAOUHSC_01338	3920202	11	9.15	1295.55	Q2FYT7	yes	yes	2	0.0049617	119.27	74815	74815	0	0	0	0	0	0	0	0
MMNKNMDQN	Q2FYT7	UPF0154 protein SAOUHSC_01338	SAOUHSC_01338	3920202	9	5.7899	1124.44	Q2FYT7	yes	yes	2	4.8327e-15	218.55	617540	617540	0	0	0	0	0	0	0	0
MTMMNKNMDQN	Q2FYT7	UPF0154 protein SAOUHSC_01338	SAOUHSC_01338	3920202	11	5.7899	1356.53	Q2FYT7	yes	yes	2	3.1389e-06	163.12	96277	96277	0	0	0	0	0	0	0	0
QMMTMMNKNMDQNMK	Q2FYT7	UPF0154 protein SAOUHSC_01338	SAOUHSC_01338	3920202	15	8.9961	1874.76	Q2FYT7	yes	yes	2,3	0.036339	24.935	52102	0	0	0	0	52102	0	0	0	0
DFDPNSTYIQ	Q2FYS9	Aconitate hydratase (Aconitase) (EC 4.2.1.3)	SAOUHSC_01347	3920053	10	3.4918	1198.51	Q2FYS9	yes	yes	2	0.004131	125.75	159480	119760	0	39713	0	0	0	0	0	0
DMKSSFENSVT	Q2FYS9	Aconitate hydratase (Aconitase) (EC 4.2.1.3)	SAOUHSC_01347	3920053	11	4.184	1243.54	Q2FYS9	yes	yes	2	0.0006084	140.24	633860	544580	37684	51601	0	0	0	0	0	0
AINQDGYKSLEEGQAVE	Q2FYN2	Cold shock protein CspA	cspA SAOUHSC_01403	3920693	17	3.7781	1849.87	Q2FYN2	yes	yes	2	0.00082421	106.93	204190	91453	0	0	0	112740	0	0	0	0
DRGPQAANVVKL	Q2FYN2	Cold shock protein CspA	cspA SAOUHSC_01403	3920693	12	9.1455	1266.7	Q2FYN2	yes	yes	2,3	1.9687e-14	184.24	1514300	490570	99273	600610	0	224220	34967	22169	33502	8984.2
EGENDVFVH	Q2FYN2	Cold shock protein CspA	cspA SAOUHSC_01403	3920693	9	3.9262	1044.45	Q2FYN2	yes	yes	2	0.0057019	136.8	5159900	500170	570960	782490	535710	291700	276020	631310	778910	792590
GDRGPQAANVVKL	Q2FYN2	Cold shock protein CspA	cspA SAOUHSC_01403	3920693	13	9.1455	1323.73	Q2FYN2	yes	yes	3	1.1555e-06	147.24	1199500	401190	0	168610	0	493480	119820	0	16404	0
GENDVFVH	Q2FYN2	Cold shock protein CspA	cspA SAOUHSC_01403	3920693	8	4.1808	915.409	Q2FYN2	yes	yes	2	0.00020912	193.28	7349700	146210	324090	469720	433400	678140	809970	1839900	1546600	1101700
GPQAANVVKL	Q2FYN2	Cold shock protein CspA	cspA SAOUHSC_01403	3920693	10	9.15	995.576	Q2FYN2	yes	yes	2	0.0030382	135.71	1044600	138740	125590	230030	124700	142580	88244	97957	56379	40416
INQDGYKSLEEGQAVE	Q2FYN2	Cold shock protein CspA	cspA SAOUHSC_01403	3920693	16	3.7781	1778.83	Q2FYN2	yes	yes	2	0.0018251	101.2	51629	51629	0	0	0	0	0	0	0	0
NQDGYKSLEEG	Q2FYN2	Cold shock protein CspA	cspA SAOUHSC_01403	3920693	11	3.9274	1238.54	Q2FYN2	yes	yes	2	0.0056878	116.55	351120	52988	42014	63812	0	41330	0	62837	49278	38862
NQDGYKSLEEGQAVE	Q2FYN2	Cold shock protein CspA	cspA SAOUHSC_01403	3920693	15	3.7781	1665.75	Q2FYN2	yes	yes	2	4.3987e-06	120.66	547390	144490	23373	99234	87085	114730	0	21966	30946	25566
PQAANVVKL	Q2FYN2	Cold shock protein CspA	cspA SAOUHSC_01403	3920693	9	9.15	938.555	Q2FYN2	yes	yes	2	0.00046807	172.21	7560700	896090	829600	1578700	326990	1252200	880960	765610	621790	408820
RGPQAANVVKL	Q2FYN2	Cold shock protein CspA	cspA SAOUHSC_01403	3920693	11	11.6501	1151.68	Q2FYN2	yes	yes	2,3	2.1743e-10	192.26	6210600	2454200	184940	599890	1170600	1050400	295360	199480	223490	32327
VEGDRGPQAAN	Q2FYN2	Cold shock protein CspA	cspA SAOUHSC_01403	3920693	11	4.184	1112.52	Q2FYN2	yes	yes	2	0.0097213	108.7	1355600	0	0	1355600	0	0	0	0	0	0
VEGDRGPQAANVVKL	Q2FYN2	Cold shock protein CspA	cspA SAOUHSC_01403	3920693	15	5.9482	1551.84	Q2FYN2	yes	yes	3	5.621e-06	119.25	933840	345220	73705	68376	89300	319940	37300	0	0	0
VEGENDVFVH	Q2FYN2	Cold shock protein CspA	cspA SAOUHSC_01403	3920693	10	3.9262	1143.52	Q2FYN2	yes	yes	2	1.2872e-48	259.58	10000000	1171900	442400	1210600	1758800	872020	582150	1154300	1467900	1340100
VVEGDRGPQAAN	Q2FYN2	Cold shock protein CspA	cspA SAOUHSC_01403	3920693	12	4.184	1211.59	Q2FYN2	yes	yes	2	1.6305e-11	179.35	10332000	673740	335340	0	1333900	1030400	1930000	829470	2336900	1862400
TKQIIVTD	Q2FYK7	Uncharacterized protein	SAOUHSC_01433	3920214	8	5.7899	916.523	Q2FYK7	yes	yes	2	0.014553	164.96	1559700	261030	229470	206730	260240	241910	127540	162860	36263	33619
TKQIIVTDST	Q2FYK7	Uncharacterized protein	SAOUHSC_01433	3920214	10	5.7899	1104.6	Q2FYK7	yes	yes	2	0.011636	118.28	206770	33923	49957	43425	0	31750	24537	23176	0	0
VKEGVSTSE	Q2FYK7	Uncharacterized protein	SAOUHSC_01433	3920214	9	4.2577	934.461	Q2FYK7	yes	yes	2	0.037907	107.79	264340	0	0	264340	0	0	0	0	0	0
REGMTSDTYT	Q2FYK2	Uncharacterized protein	SAOUHSC_01438	3920219	10	4.184	1159.48	Q2FYK2	yes	yes	2	0.039856	94.692	181480	0	0	0	0	0	0	62789	59459	59227
SESREGMTSDT	Q2FYK2	Uncharacterized protein	SAOUHSC_01438	3920219	11	3.9274	1198.48	Q2FYK2	yes	yes	2	4.8604e-07	168.3	569060	0	20983	0	0	0	0	0	410530	137540
VDKENDANWE	Q2FYK2	Uncharacterized protein	SAOUHSC_01438	3920219	10	3.7378	1218.52	Q2FYK2	yes	yes	2	0.024563	106.29	154200	0	0	0	0	59013	6986.1	30805	14212	43182
EAKALNRAMDQ	Q2FYJ6	Extracellular matrix-binding protein ebh (ECM-binding protein homolog)	ebh SAOUHSC_01447	3920225	11	5.9482	1245.61	Q2FYJ6	yes	yes	2	0.0030945	92.611	0	0	0	0	0	0	0	0	0	0
IADTSKGVVG	Q2FYJ3	L-threonine dehydratase catabolic TdcB (EC 4.3.1.19) (Threonine deaminase)	tdcB SAOUHSC_01451	3920228	10	5.7899	945.513	Q2FYJ3	yes	yes	2	9.3829e-05	142	3939400	176280	0	1998900	300740	792460	360760	0	0	310260
YMNSNTNAEKVV	Q2FYI7	Uncharacterized protein	SAOUHSC_01459	3919902	12	5.8607	1368.63	Q2FYI7	yes	yes	2	1.1499e-07	165.58	2969800	0	0	0	809720	504540	410980	1244600	0	0
YMNSNTNAEKVVS	Q2FYI7	Uncharacterized protein	SAOUHSC_01459	3919902	13	5.8607	1455.67	Q2FYI7	yes	yes	2	1.0672e-09	155.08	3777900	0	0	0	1088600	924180	474730	1290300	0	0
AIGKNLTGGFG	Q2FYI0	Penicillin-binding protein 2	SAOUHSC_01467	3919909	11	9.15	1033.56	Q2FYI0	yes	yes	2	0.021165	98.04	363630	203120	50479	110030	0	0	0	0	0	0
AIGKNLTGGFGSE	Q2FYI0	Penicillin-binding protein 2	SAOUHSC_01467	3919909	13	5.8613	1249.63	Q2FYI0	yes	yes	2	1.9243e-33	216.68	584930	460340	29114	95473	0	0	0	0	0	0
AIGKNLTGGFGSEGAS	Q2FYI0	Penicillin-binding protein 2	SAOUHSC_01467	3919909	16	5.8613	1464.72	Q2FYI0	yes	yes	2	0.020693	90.725	73103	73103	0	0	0	0	0	0	0	0
AIGKNLTGGFGSEGASTLT	Q2FYI0	Penicillin-binding protein 2	SAOUHSC_01467	3919909	19	5.8613	1779.9	Q2FYI0	yes	yes	2	0.024799	90.422	64069	14934	0	0	0	49135	0	0	0	0
AKTGTGTYGAETYS	Q2FYI0	Penicillin-binding protein 2	SAOUHSC_01467	3919909	14	5.8602	1405.64	Q2FYI0	yes	yes	2	0.0013907	105.99	140910	0	0	130390	0	0	0	10522	0	0
ASAFAAIANGGTYN	Q2FYI0	Penicillin-binding protein 2	SAOUHSC_01467	3919909	14	5.5494	1326.62	Q2FYI0	yes	yes	2	7.0569e-10	148.68	390570	181640	36754	119430	16380	36360	0	0	0	0
ATILDSKTGGLVA	Q2FYI0	Penicillin-binding protein 2	SAOUHSC_01467	3919909	13	5.7899	1244.7	Q2FYI0	yes	yes	2	0.00064493	110.8	286700	80890	110410	95402	0	0	0	0	0	0
DGVTGIKAA	Q2FYI0	Penicillin-binding protein 2	SAOUHSC_01467	3919909	9	5.7899	830.45	Q2FYI0	yes	yes	2	0.027635	113.71	222960	78435	144520	0	0	0	0	0	0	0
DSKTGGLVAI	Q2FYI0	Penicillin-binding protein 2	SAOUHSC_01467	3919909	10	5.7899	959.529	Q2FYI0	yes	yes	2	0.0088569	120.99	1914900	269660	447080	798900	110180	148730	87685	28283	24405	0
FAAIANGGTYN	Q2FYI0	Penicillin-binding protein 2	SAOUHSC_01467	3919909	11	5.5494	1097.51	Q2FYI0	yes	yes	2	0.0023929	130.41	330030	88944	46269	102090	17722	33988	16406	24614	0	0
FAAIANGGTYNNAH	Q2FYI0	Penicillin-binding protein 2	SAOUHSC_01467	3919909	14	6.9995	1419.65	Q2FYI0	yes	yes	2	0.002887	100.38	219200	0	39643	179560	0	0	0	0	0	0
GAKTGTGTYGAET	Q2FYI0	Penicillin-binding protein 2	SAOUHSC_01467	3919909	13	5.8607	1212.56	Q2FYI0	yes	yes	2	6.4196e-07	150.49	905230	41520	0	627280	236440	0	0	0	0	0
GGSASEFSPTQL	Q2FYI0	Penicillin-binding protein 2	SAOUHSC_01467	3919909	12	3.8497	1179.54	Q2FYI0	yes	yes	2	0.011262	100.04	418320	51875	83870	222140	14723	31061	14651	0	0	0
GSASEFSPTQLASA	Q2FYI0	Penicillin-binding protein 2	SAOUHSC_01467	3919909	14	3.8497	1351.63	Q2FYI0	yes	yes	2	1.0306e-07	136.3	466840	188570	118440	159830	0	0	0	0	0	0
IANGGTYNNAH	Q2FYI0	Penicillin-binding protein 2	SAOUHSC_01467	3919909	11	6.9995	1130.51	Q2FYI0	yes	yes	2	0.0079121	110.38	349680	81222	33141	155600	79722	0	0	0	0	0
LGGSASEFSPTQL	Q2FYI0	Penicillin-binding protein 2	SAOUHSC_01467	3919909	13	3.8497	1292.62	Q2FYI0	yes	yes	2	1.8549e-06	142.83	401660	81459	27364	133790	63431	84572	11042	0	0	0
LTGGFGSEGAST	Q2FYI0	Penicillin-binding protein 2	SAOUHSC_01467	3919909	12	3.8497	1082.49	Q2FYI0	yes	yes	2	0.015287	96.171	186570	36051	30195	0	70642	28289	0	21398	0	0
NAGNDAPKKFA	Q2FYI0	Penicillin-binding protein 2	SAOUHSC_01467	3919909	11	8.9961	1131.57	Q2FYI0	yes	yes	2	0.0063852	113.93	409250	107420	49883	251950	0	0	0	0	0	0
NMDKDVQKT	Q2FYI0	Penicillin-binding protein 2	SAOUHSC_01467	3919909	9	5.9023	1077.51	Q2FYI0	yes	yes	2	0.00044076	172.88	180670	0	180670	0	0	0	0	0	0	0
QQVVKDAFLS	Q2FYI0	Penicillin-binding protein 2	SAOUHSC_01467	3919909	10	5.7899	1133.61	Q2FYI0	yes	yes	2	0.036351	96.342	254790	81667	86439	86685	0	0	0	0	0	0
QYNLPDNAAKD	Q2FYI0	Penicillin-binding protein 2	SAOUHSC_01467	3919909	11	4.109	1247.58	Q2FYI0	yes	yes	2	0.013197	105.46	138460	0	52554	85908	0	0	0	0	0	0
SAFAAIANGGTYN	Q2FYI0	Penicillin-binding protein 2	SAOUHSC_01467	3919909	13	5.5494	1255.58	Q2FYI0	yes	yes	2	0.012252	95.094	362500	130260	97175	135060	0	0	0	0	0	0
TGGFGSEGASTLTQQ	Q2FYI0	Penicillin-binding protein 2	SAOUHSC_01467	3919909	15	3.8497	1439.65	Q2FYI0	yes	yes	2	1.8462e-10	150.11	213540	39493	58773	103230	12042	0	0	0	0	0
VNRNQATDPHPT	Q2FYI0	Penicillin-binding protein 2	SAOUHSC_01467	3919909	12	7.0013	1348.65	Q2FYI0	yes	yes	3	0.013114	97.734	856240	187130	194800	225900	77882	95848	74681	0	0	0
VTRDGETIEYDHT	Q2FYI0	Penicillin-binding protein 2	SAOUHSC_01467	3919909	13	4.1035	1534.69	Q2FYI0	yes	yes	2,3	1.7369e-80	160.67	2904700	710060	225040	1440700	0	376160	152690	0	0	0
YYSDGVTGIKA	Q2FYI0	Penicillin-binding protein 2	SAOUHSC_01467	3919909	11	5.7888	1172.57	Q2FYI0	yes	yes	2	9.1296e-05	152.54	2088800	465950	463570	562290	244520	305930	35973	0	10535	0
YYSDGVTGIKAA	Q2FYI0	Penicillin-binding protein 2	SAOUHSC_01467	3919909	12	5.7888	1243.61	Q2FYI0	yes	yes	2	0.0099158	101.71	175340	54140	46697	74501	0	0	0	0	0	0
DYALNQVTNELS	Q2FYH5	3'-5' exonuclease DinG (EC 3.1.-.-)	dinG SAOUHSC_01472	3919914	12	3.55	1365.64	Q2FYH5	yes	yes	2	0.011491	99.752	157210	0	157210	0	0	0	0	0	0	0
AGKALKDAVK	Q2FYG2	DNA-binding protein HU, putative	SAOUHSC_01490	14478799	10	10.4996	999.608	Q2FYG2	yes	yes	2	0.00062724	151.22	226410	199450	26961	0	0	0	0	0	0	0
MNKTDLIN	Q2FYG2	DNA-binding protein HU, putative	SAOUHSC_01490	14478799	8	5.7899	947.475	Q2FYG2	yes	yes	2	0.04016	131.06	17075000	517040	2554800	2117500	5921100	2745500	1130000	1253200	261600	573990
MNKTDLINA	Q2FYG2	DNA-binding protein HU, putative	SAOUHSC_01490	14478799	9	5.7899	1018.51	Q2FYG2	yes	yes	2	2.3317e-06	193.38	11145000	603700	774570	867380	3316100	1863400	1503800	965110	679220	572070
MNKTDLINAVAE	Q2FYG2	DNA-binding protein HU, putative	SAOUHSC_01490	14478799	12	4.184	1317.66	Q2FYG2	yes	yes	2	0.0029472	110.38	359360	255760	90274	0	0	13327	0	0	0	0
MNKTDLINAVAEQA	Q2FYG2	DNA-binding protein HU, putative	SAOUHSC_01490	14478799	14	4.184	1516.76	Q2FYG2	yes	yes	2	0.0088219	94.717	33124	0	0	0	0	33124	0	0	0	0
MNKTDLINAVAEQAD	Q2FYG2	DNA-binding protein HU, putative	SAOUHSC_01490	14478799	15	3.8759	1631.78	Q2FYG2	yes	yes	2	2.2917e-14	161.24	591270	48311	0	0	0	542960	0	0	0	0
VAEQADLTKKEAGSAVD	Q2FYG2	DNA-binding protein HU, putative	SAOUHSC_01490	14478799	17	4.1051	1730.87	Q2FYG2	yes	yes	3	0.0048733	77.42	0	0	0	0	0	0	0	0	0	0
PNEDVVESDPSTTKA	Q2FYF9	30S ribosomal protein S1, putative	SAOUHSC_01493	3920248	15	3.7378	1587.73	Q2FYF9	yes	yes	2	8.818e-36	209.6	1979800	73425	175970	415170	560510	514490	220440	9742.9	0	10089
SPSEVVKEGDEVE	Q2FYF9	30S ribosomal protein S1, putative	SAOUHSC_01493	3920248	13	3.6718	1402.65	Q2FYF9	yes	yes	2	3.9107e-05	136.3	368520	170040	53837	118330	0	26315	0	0	0	0
TEEFNESMIN	Q2FYF9	30S ribosomal protein S1, putative	SAOUHSC_01493	3920248	10	3.4727	1212.5	Q2FYF9	yes	yes	2	0.0030041	136.02	981540	363950	190740	138970	78683	78548	0	110080	20569	0
TEEFNESMIND	Q2FYF9	30S ribosomal protein S1, putative	SAOUHSC_01493	3920248	11	3.3316	1327.52	Q2FYF9	yes	yes	2	6.7755e-38	241.92	2402700	440830	294790	693920	87951	239920	97889	291630	126090	129660
AIFGGMALNNHN	Q2FYF1	Elastin-binding protein EbpS	ebpS SAOUHSC_01501	3919044	12	7.0004	1257.59	Q2FYF1	yes	yes	2	0.0078978	104.22	203610	90058	36381	77176	0	0	0	0	0	0
AIFGGMALNNHNN	Q2FYF1	Elastin-binding protein EbpS	ebpS SAOUHSC_01501	3919044	13	7.0004	1371.64	Q2FYF1	yes	yes	2	5.83e-05	134.75	552040	245930	72430	203510	0	16681	0	13500	0	0
LSGNNIRNGQQ	Q2FYF1	Elastin-binding protein EbpS	ebpS SAOUHSC_01501	3919044	11	10	1199.6	Q2FYF1	yes	yes	2	2.5595e-14	202.56	3657000	980360	1143100	863220	597440	0	0	0	0	72849
NGLSGNNIRN	Q2FYF1	Elastin-binding protein EbpS	ebpS SAOUHSC_01501	3919044	10	10	1057.53	Q2FYF1	yes	yes	2	3.1955e-05	160.36	294620	294620	0	0	0	0	0	0	0	0
NIRNGQQIVIP	Q2FYF1	Elastin-binding protein EbpS	ebpS SAOUHSC_01501	3919044	11	10	1250.71	Q2FYF1	yes	yes	2	0.0028808	127.76	2492700	774970	82391	581750	61044	823750	116830	35315	16650	0
QYYGSGSPENVEKI	Q2FYF1	Elastin-binding protein EbpS	ebpS SAOUHSC_01501	3919044	14	4.2577	1569.73	Q2FYF1	yes	yes	2	1.3611e-09	143.25	252540	132580	16146	103810	0	0	0	0	0	0
VNGQENLYR	Q2FYF1	Elastin-binding protein EbpS	ebpS SAOUHSC_01501	3919044	9	5.8608	1091.54	Q2FYF1	yes	yes	2	0.00080038	162.88	2821200	209840	543340	1306800	482970	188130	0	0	51579	38574
VNGQENLYRI	Q2FYF1	Elastin-binding protein EbpS	ebpS SAOUHSC_01501	3919044	10	5.8608	1204.62	Q2FYF1	yes	yes	2	0.0082266	121.6	298370	110040	54105	121360	12868	0	0	0	0	0
VNGQENLYRIA	Q2FYF1	Elastin-binding protein EbpS	ebpS SAOUHSC_01501	3919044	11	5.8608	1275.66	Q2FYF1	yes	yes	2	0.006676	112.83	259880	91298	31565	117480	0	19541	0	0	0	0
QGFQPPAEKD	Q2FYE2	Uncharacterized protein	SAOUHSC_01512	3919053	10	4.184	1115.52	Q2FYE2;Q2FYE5;Q2FYE3	yes	no	2	3.1955e-05	160.36	278250	44166	19976	48280	153810	0	12014	0	0	0
MYEDYKVVNTEVSD	Q2FYC7	Phage portal protein, HK97 family	SAOUHSC_01537	3920580	14	3.7378	1690.74	Q2FYC7	yes	yes	2	0.017114	91.961	3422900	683090	777000	1690100	0	81145	0	0	191530	0
MGVSGGEIGALT	Q2FY60	6-phosphogluconate dehydrogenase, decarboxylating (EC 1.1.1.44)	SAOUHSC_01605	3920021	12	3.8497	1090.53	Q2FY60	yes	yes	2	0.0008045	130.98	165330	143870	7419.8	14044	0	0	0	0	0	0
DMNFDLYMNGVVEQAR	Q2FY55	UPF0403 protein SAOUHSC_01610	SAOUHSC_01610	3920026	16	3.8759	1900.84	Q2FY55	yes	yes	2	0.041394	44.925	492800	0	0	0	43022	113250	113960	67913	17724	136930
VKVTDYSN	Q2FY44	Uncharacterized protein	SAOUHSC_01622	3919960	8	5.7894	924.455	Q2FY44	yes	yes	2	0.011918	163.94	2086100	173800	475660	349270	148800	145890	168910	301510	154390	167890
GDGSYISRG	Q2FY41	Elongation factor P (EF-P)	efp SAOUHSC_01625	3919963	9	5.7895	910.414	Q2FY41	yes	yes	2	6.9914e-07	128.86	257100	0	0	0	36625	121560	98916	0	0	0
INTGDGSYISRG	Q2FY41	Elongation factor P (EF-P)	efp SAOUHSC_01625	3919963	12	5.7895	1238.59	Q2FY41	yes	yes	2	5.9416e-12	181.98	707000	52322	20143	132300	108310	217830	122100	53997	0	0
NTGDGSYISRG	Q2FY41	Elongation factor P (EF-P)	efp SAOUHSC_01625	3919963	11	5.7895	1125.51	Q2FY41	yes	yes	2	1.2028e-07	169.65	2598400	229050	472100	298690	238220	336820	412470	244160	239930	126940
TGDGSYISRG	Q2FY41	Elongation factor P (EF-P)	efp SAOUHSC_01625	3919963	10	5.7895	1011.46	Q2FY41	yes	yes	2	6.6255e-31	185.08	5116000	29679	1004700	856610	305760	558370	905150	711630	292460	451650
VLIINTGDGSYISRG	Q2FY41	Elongation factor P (EF-P)	efp SAOUHSC_01625	3919963	15	5.7895	1563.83	Q2FY41	yes	yes	2	3.8997e-20	175.66	195360	21932	0	0	0	173430	0	0	0	0
YEGETIGVELPK	Q2FY41	Elongation factor P (EF-P)	efp SAOUHSC_01625	3919963	12	3.9798	1333.68	Q2FY41	yes	yes	2	0.026481	92.19	61847	0	0	0	0	61847	0	0	0	0
ANGIASYRA	Q2FY36	Uncharacterized protein	SAOUHSC_01630	3919968	9	8.799	921.467	Q2FY36	yes	yes	2	0.012391	126.07	1143200	0	0	0	227380	171970	141510	189820	311620	100860
AQVIDVREK	Q2FY36	Uncharacterized protein	SAOUHSC_01630	3919968	9	5.9482	1056.59	Q2FY36	yes	yes	2	0.027635	113.71	605170	0	0	0	34333	186170	245030	0	112120	27519
DANGIASYR	Q2FY36	Uncharacterized protein	SAOUHSC_01630	3919968	9	5.7895	965.457	Q2FY36	yes	yes	2	0.00097151	157.66	1728400	0	57611	138770	336910	383100	294140	233430	168890	115600
DANGIASYRA	Q2FY36	Uncharacterized protein	SAOUHSC_01630	3919968	10	5.7895	1036.49	Q2FY36	yes	yes	2	8.3313e-06	166.97	864180	72368	0	49256	47587	117940	157450	190800	145990	82777
DANGIASYRAA	Q2FY36	Uncharacterized protein	SAOUHSC_01630	3919968	11	5.7895	1107.53	Q2FY36	yes	yes	2	0.00012287	151.79	2285500	1368600	137760	735180	15153	28813	0	0	0	0
FQGLRKDQP	Q2FY36	Uncharacterized protein	SAOUHSC_01630	3919968	9	9.1455	1087.58	Q2FY36	yes	yes	2	0.0156	96.143	0	0	0	0	0	0	0	0	0	0
IVQQILNK	Q2FY36	Uncharacterized protein	SAOUHSC_01630	3919968	8	9.15	954.586	Q2FY36	yes	yes	2	0.0077248	176.66	1237300	0	0	0	233550	422470	225100	186120	109070	61009
TSKSSPLIFE	Q2FY35	Probable glycine dehydrogenase (decarboxylating) subunit 2 (EC 1.4.4.2) (Glycine cleavage system P-protein subunit 2) (Glycine decarboxylase subunit 2) (Glycine dehydrogenase (aminomethyl-transferring) subunit 2)	gcvPB SAOUHSC_01632	3919969	10	5.8613	1107.58	Q2FY35	yes	yes	2	0.0038801	128.03	1585500	951120	121290	492100	0	0	0	20967	0	0
EIDTFVEKAGELND	Q2FY34	Probable glycine dehydrogenase (decarboxylating) subunit 1 (EC 1.4.4.2) (Glycine cleavage system P-protein subunit 1) (Glycine decarboxylase subunit 1) (Glycine dehydrogenase (aminomethyl-transferring) subunit 1)	gcvPA SAOUHSC_01633	3919970	14	3.6383	1578.74	Q2FY34	yes	yes	2	1.0745e-42	219.35	116730	20032	0	0	0	96694	0	0	0	0
TFVEKAGELND	Q2FY34	Probable glycine dehydrogenase (decarboxylating) subunit 1 (EC 1.4.4.2) (Glycine cleavage system P-protein subunit 1) (Glycine decarboxylase subunit 1) (Glycine dehydrogenase (aminomethyl-transferring) subunit 1)	gcvPA SAOUHSC_01633	3919970	11	3.9274	1221.59	Q2FY34	yes	yes	2	2.2722e-06	164.81	1898700	397850	345400	262540	290250	171060	96886	130540	135640	68506
SSDLKQTPLYQN	Q2FY33	Aminomethyltransferase (EC 2.1.2.10) (Glycine cleavage system T protein)	gcvT SAOUHSC_01634	3919971	12	5.7894	1392.69	Q2FY33	yes	yes	2	0.00068998	132.5	519140	158650	65355	121340	42636	47806	17242	34489	19146	12477
DNASKMAI	Q2FY21	Penicillin-binding protein 3	SAOUHSC_01652	3920104	8	5.7899	848.406	Q2FY21	yes	yes	2	0.016085	149.65	1467000	215060	340040	219050	325350	109090	142590	22748	93028	0
SQQLSKLPGVNT	Q2FY21	Penicillin-binding protein 3	SAOUHSC_01652	3920104	12	9.15	1270.69	Q2FY21	yes	yes	2	0.0090961	102.73	212320	75813	45408	18692	52355	20050	0	0	0	0
TNNPGNYLDL	Q2FY21	Penicillin-binding protein 3	SAOUHSC_01652	3920104	10	3.7498	1119.52	Q2FY21	yes	yes	2	0.003247	133.81	347390	117480	66060	67058	45322	43797	0	7675.7	0	0
PELKNKVMQQ	Q2FY16	Probable endonuclease 4 (EC 3.1.21.2) (Endodeoxyribonuclease IV) (Endonuclease IV)	nfo SAOUHSC_01658	3920109	10	8.9962	1213.65	Q2FY16	yes	yes	2,3	8.2322e-07	172.27	4030600	723600	55530	638490	149250	1350700	480740	143470	138020	350870
AKDMDTIVS	Q2FY08	Glycine--tRNA ligase (EC 6.1.1.14) (Glycyl-tRNA synthetase) (GlyRS)	glyQS SAOUHSC_01666	3920078	9	4.109	978.469	Q2FY08	yes	yes	2	0.010961	128.36	1148700	813440	68238	249250	17791	0	0	0	0	0
AINKRTDQSDDESPEH	Q2FXZ9	UPF0365 protein SAOUHSC_01676	SAOUHSC_01676	3920087	16	4.2271	1840.82	Q2FXZ9	yes	yes	3	1.4943e-19	159.5	1858600	635740	207690	268700	332140	0	227920	119710	66707	0
GGNVDRVVDANIA	Q2FXZ9	UPF0365 protein SAOUHSC_01676	SAOUHSC_01676	3920087	13	4.109	1298.66	Q2FXZ9	yes	yes	2	0.03185	88.021	539530	391200	25744	122580	0	0	0	0	0	0
KRTDQSDDESPEH	Q2FXZ9	UPF0365 protein SAOUHSC_01676	SAOUHSC_01676	3920087	13	4.2271	1542.65	Q2FXZ9	yes	yes	3	7.994e-07	149.49	432850	79373	71409	196640	0	0	0	85426	0	0
NPDNISKTVLS	Q2FXZ9	UPF0365 protein SAOUHSC_01676	SAOUHSC_01676	3920087	11	5.7899	1186.62	Q2FXZ9	yes	yes	2	0.013657	105.03	314630	261990	38406	0	14234	0	0	0	0	0
AEFKEVKDDDKK	Q2FXZ2	Chaperone protein DnaK (HSP70) (Heat shock 70 kDa protein) (Heat shock protein 70)	dnaK SAOUHSC_01683	3921795	12	4.6356	1450.73	Q2FXZ2	yes	yes	3	0.00064724	133.07	1213800	962130	52202	0	59385	74592	43923	0	21573	0
ANAGQNNDSTVEDAEFK	Q2FXZ2	Chaperone protein DnaK (HSP70) (Heat shock 70 kDa protein) (Heat shock protein 70)	dnaK SAOUHSC_01683	3921795	17	3.7378	1808.78	Q2FXZ2	yes	yes	2	0.0018005	101.96	138540	42054	42950	53533	0	0	0	0	0	0
DNKLGGDDFD	Q2FXZ2	Chaperone protein DnaK (HSP70) (Heat shock 70 kDa protein) (Heat shock protein 70)	dnaK SAOUHSC_01683	3921795	10	3.6616	1094.45	Q2FXZ2	yes	yes	2	0.0079238	121.9	220750	64421	77596	78729	0	0	0	0	0	0
GDNKLGGDDFD	Q2FXZ2	Chaperone protein DnaK (HSP70) (Heat shock 70 kDa protein) (Heat shock protein 70)	dnaK SAOUHSC_01683	3921795	11	3.6616	1151.47	Q2FXZ2	yes	yes	2	0.0028618	127.87	1063200	175480	286210	263620	116620	98134	32384	12850	77889	0
NPEGSRTTPSVVA	Q2FXZ2	Chaperone protein DnaK (HSP70) (Heat shock 70 kDa protein) (Heat shock protein 70)	dnaK SAOUHSC_01683	3921795	13	5.8614	1313.66	Q2FXZ2	yes	yes	2	0.048361	71.176	137140	137140	0	0	0	0	0	0	0	0
ADNKNELVSL	Q2FXY6	30S ribosomal protein S20	rpsT SAOUHSC_01689	3921801	10	4.184	1101.57	Q2FXY6	yes	yes	2	0.032341	99.568	3360600	502560	328810	1071500	192860	354960	253000	324650	187280	144930
AVKLVDKAAQ	Q2FXY6	30S ribosomal protein S20	rpsT SAOUHSC_01689	3921801	10	8.9961	1041.62	Q2FXY6	yes	yes	2	0.0079238	121.9	522600	321610	44713	81069	0	0	39826	0	35382	0
AVKNAKTAVSNNADNKN	Q2FXY6	30S ribosomal protein S20	rpsT SAOUHSC_01689	3921801	17	10.4996	1757.9	Q2FXY6	yes	yes	3	0.041067	86.548	279790	223570	18511	37706	0	0	0	0	0	0
SNLIHSNKA	Q2FXY6	30S ribosomal protein S20	rpsT SAOUHSC_01689	3921801	9	9.1715	982.52	Q2FXY6	yes	yes	2	0.015295	123.51	601310	288780	0	0	0	0	0	0	66495	246040
SNNADNKNELVSL	Q2FXY6	30S ribosomal protein S20	rpsT SAOUHSC_01689	3921801	13	4.184	1416.68	Q2FXY6	yes	yes	2	0.0038668	104.59	637570	96546	31415	178460	92408	71076	65381	50170	28507	23609
TAVSNNADNKNELVSL	Q2FXY6	30S ribosomal protein S20	rpsT SAOUHSC_01689	3921801	16	4.184	1687.84	Q2FXY6	yes	yes	2	0.00010666	110.55	1080100	98561	43790	234580	100620	340190	128190	82175	36923	15071
GGEMNVKIVNIQ	Q2FXW7	Transcription elongation factor GreA (Transcript cleavage factor GreA)	greA SAOUHSC_01714	3921103	12	5.8613	1300.68	Q2FXW7	yes	yes	2	0.010648	101.71	502580	0	61678	219290	96438	48818	27686	33563	15106	0
MIEEVVNTEMEE	Q2FXW2	UPF0473 protein SAOUHSC_01719	SAOUHSC_01719	3921108	12	3.2903	1451.62	Q2FXW2	yes	yes	2	4.6995e-07	155.02	96708	17058	0	0	0	79650	0	0	0	0
MSDPTLFDYSM	Q2FXV8	ATP-dependent RecD-like DNA helicase (EC 3.6.4.12)	recD2 SAOUHSC_01723	3921073	11	3.4918	1305.53	Q2FXV8	yes	yes	3	0.01018	16.254	0	0	0	0	0	0	0	0	0	0
DCNYMIGMAFNQ	Q2FXV7	Uncharacterized protein	SAOUHSC_01724	3921074	12	3.7498	1462.57	Q2FXV7	yes	yes	2	0.01338	99.283	2669000	144320	0	21365	107400	117180	138960	1246200	893550	0
KPAIKQVDPS	Q2FXT7	Preprotein translocase, YajC subunit	SAOUHSC_01747	3920546	10	8.9961	1081.61	Q2FXT7	yes	yes	2	3.1955e-05	160.36	2850300	1584100	271100	959700	0	0	0	35330	0	0
NVGRGGDDTLFA	Q2FXT0	50S ribosomal protein L27	rpmA SAOUHSC_01755	3920553	12	4.109	1220.58	Q2FXT0	yes	yes	2	0.015124	96.229	132680	132680	0	0	0	0	0	0	0	0
TKIYPGENVGRGGD	Q2FXT0	50S ribosomal protein L27	rpmA SAOUHSC_01755	3920553	14	5.9476	1461.72	Q2FXT0	yes	yes	3	0.0032692	98.942	111860	111860	0	0	0	0	0	0	0	0
APTVEGATVT	Q2FXS8	50S ribosomal protein L21	rplU SAOUHSC_01757	3920555	10	3.8497	944.481	Q2FXS8	yes	yes	2	0.011579	118.33	1030000	607700	173550	233740	0	0	0	15051	0	0
APTVEGATVTA	Q2FXS8	50S ribosomal protein L21	rplU SAOUHSC_01757	3920555	11	3.8497	1015.52	Q2FXS8	yes	yes	2	0.013482	105.2	280320	280320	0	0	0	0	0	0	0	0
FVGGDSVKVG	Q2FXS8	50S ribosomal protein L21	rplU SAOUHSC_01757	3920555	10	5.7899	963.503	Q2FXS8	yes	yes	2	0.00073256	150.61	2087000	1652400	102160	332420	0	0	0	0	0	0
DSVSFGQRVV	Q2FXS6	Cell shape-determining protein MreC (Cell shape protein MreC)	SAOUHSC_01759	3920557	10	5.79	1092.56	Q2FXS6	yes	yes	2	1.0075e-13	207.83	1017000	455290	140710	297700	32008	37067	19468	0	21950	12800
EVTKVQNDQYG	Q2FXS6	Cell shape-determining protein MreC (Cell shape protein MreC)	SAOUHSC_01759	3920557	11	4.184	1279.6	Q2FXS6	yes	yes	2	9.7217e-155	197.3	482930	235880	0	247050	0	0	0	0	0	0
PKTIPDDESRDK	Q2FXS6	Cell shape-determining protein MreC (Cell shape protein MreC)	SAOUHSC_01759	3920557	12	4.4987	1399.69	Q2FXS6	yes	yes	3	7.0639e-06	153.74	2879900	475880	256760	460210	0	591900	509640	87195	263860	234440
QLESKNQQLEA	Q2FXS6	Cell shape-determining protein MreC (Cell shape protein MreC)	SAOUHSC_01759	3920557	11	4.2577	1286.65	Q2FXS6	yes	yes	2	3.857e-10	187.85	2950700	329690	1307200	875590	166510	85280	119350	0	38545	28506
TIVIDKGSKS	Q2FXS6	Cell shape-determining protein MreC (Cell shape protein MreC)	SAOUHSC_01759	3920557	10	8.9961	1046.6	Q2FXS6	yes	yes	2	0.029557	101.97	324760	324760	0	0	0	0	0	0	0	0
AVSGMNRMA	Q2FXS4	Uncharacterized protein	SAOUHSC_01761	3920559	9	10	935.432	Q2FXS4	yes	yes	2	0.0048909	138.1	1613800	33735	470760	318490	97131	428160	265530	0	0	0
NQVTQPTNDAQHVYV	Q2FXS4	Uncharacterized protein	SAOUHSC_01761	3920559	15	5.2713	1712.81	Q2FXS4	yes	yes	2	5.1925e-20	173.06	231070	66523	0	97238	12296	45107	9905.9	0	0	0
QVTQPTNDAQHVYV	Q2FXS4	Uncharacterized protein	SAOUHSC_01761	3920559	14	5.2713	1598.77	Q2FXS4	yes	yes	2	1.0309e-90	273.27	3769100	445120	480250	2127100	244200	260680	161760	0	36702	13281
TQPTNDAQHVYV	Q2FXS4	Uncharacterized protein	SAOUHSC_01761	3920559	12	5.2713	1371.64	Q2FXS4	yes	yes	2	0.00038641	136.53	8338900	761890	875910	4375200	861200	513130	693500	65454	121420	71235
VSGMNRMA	Q2FXS4	Uncharacterized protein	SAOUHSC_01761	3920559	8	10	864.395	Q2FXS4	yes	yes	2	0.0050795	179.21	306850	0	0	0	133860	0	172990	0	0	0
AEGNLINNSKTSA	Q2FXQ7	ATP-dependent Clp protease ATP-binding subunit ClpX	clpX SAOUHSC_01778	3919696	13	5.8613	1317.65	Q2FXQ7	yes	yes	2	1.2143e-21	196.84	3422800	477740	235160	483330	429890	468290	433370	225550	415710	253740
AIDETDIKPVA	Q2FXQ6	Trigger factor (TF) (EC 5.2.1.8) (PPIase)	tig SAOUHSC_01779	3919697	11	3.8759	1170.61	Q2FXQ6	yes	yes	2	0.0030756	126.71	373790	50913	71038	44797	122230	43966	29601	11244	0	0
AKFVEGTKED	Q2FXQ6	Trigger factor (TF) (EC 5.2.1.8) (PPIase)	tig SAOUHSC_01779	3919697	10	4.4258	1122.56	Q2FXQ6	yes	yes	2,3	1.6659e-05	164.64	9628600	854190	570670	1463600	1951700	2320800	1285800	508020	446760	227200
DETDIKPVA	Q2FXQ6	Trigger factor (TF) (EC 5.2.1.8) (PPIase)	tig SAOUHSC_01779	3919697	9	3.8759	986.492	Q2FXQ6	yes	yes	2	0.015494	123.35	479970	67187	53351	0	196990	69140	50147	23922	19237	0
GEAIDETDIKPVA	Q2FXQ6	Trigger factor (TF) (EC 5.2.1.8) (PPIase)	tig SAOUHSC_01779	3919697	13	3.7378	1356.68	Q2FXQ6	yes	yes	2	0.00030356	118.87	401620	47600	36230	63225	129500	66831	46453	0	11784	0
GGQAEGYDLEIG	Q2FXQ6	Trigger factor (TF) (EC 5.2.1.8) (PPIase)	tig SAOUHSC_01779	3919697	12	3.4246	1207.54	Q2FXQ6	yes	yes	2	0.0017	119.45	281710	178360	30540	72814	0	0	0	0	0	0
IDETDIKPVA	Q2FXQ6	Trigger factor (TF) (EC 5.2.1.8) (PPIase)	tig SAOUHSC_01779	3919697	10	3.8759	1099.58	Q2FXQ6	yes	yes	2	3.0119e-07	179.42	1007200	138210	77185	194150	322460	90646	55628	47267	46518	35148
KEDGVVENGDTVN	Q2FXQ6	Trigger factor (TF) (EC 5.2.1.8) (PPIase)	tig SAOUHSC_01779	3919697	13	3.7378	1374.63	Q2FXQ6	yes	yes	2	0.00038722	115.34	777710	89924	180740	0	54215	93887	81909	118860	98909	59272
KEVPELTD	Q2FXQ6	Trigger factor (TF) (EC 5.2.1.8) (PPIase)	tig SAOUHSC_01779	3919697	8	3.9274	929.471	Q2FXQ6	yes	yes	2	0.013213	160.11	1018100	709990	88223	153400	0	30322	15198	0	20924	0
NAKFVEGTKED	Q2FXQ6	Trigger factor (TF) (EC 5.2.1.8) (PPIase)	tig SAOUHSC_01779	3919697	11	4.4258	1236.6	Q2FXQ6	yes	yes	2,3	2.3746e-28	231.05	28652000	1885400	3713000	2467000	6383400	4970300	3255800	2252800	1161100	2563600
VVKEDGVVENGDTVN	Q2FXQ6	Trigger factor (TF) (EC 5.2.1.8) (PPIase)	tig SAOUHSC_01779	3919697	15	3.7378	1572.76	Q2FXQ6	yes	yes	2	2.901e-14	159.18	684070	86092	0	66964	147490	186750	83622	48605	53836	10716
SDEKAFAQL	Q2FXQ1	50S ribosomal protein L20	rplT SAOUHSC_01784	3920426	9	4.184	1007.49	Q2FXQ1	yes	yes	2	0.0019371	149.72	629650	172120	23073	72129	109160	79950	84255	72045	0	16923
MPKMKTHRGAA	Q2FXQ0	50S ribosomal protein L35	rpmI SAOUHSC_01785	3920427	11	11.8223	1226.64	Q2FXQ0	yes	yes	2	0.0073425	96.143	24579000	0	0	0	1415100	6784700	2326000	11490000	330790	2232800
AKDQTQIND	Q2FXP9	Translation initiation factor IF-3	infC SAOUHSC_01786	3920428	9	4.109	1031.49	Q2FXP9	yes	yes	2	0.00066216	167.09	302760	0	0	302760	0	0	0	0	0	0
LVVVAPNAKPPVA	Q2FXP9	Translation initiation factor IF-3	infC SAOUHSC_01786	3920428	13	9.15	1273.78	Q2FXP9	yes	yes	2	0.00034733	117.02	85805	85805	0	0	0	0	0	0	0	0
ATNIRFPETSG	Q2FXN4	Isocitrate dehydrogenase [NADP] (EC 1.1.1.42)	SAOUHSC_01801	3920442	11	5.8614	1191.59	Q2FXN4	yes	yes	2	0.0086211	109.72	268280	226350	16019	25915	0	0	0	0	0	0
TAEKITQGTEGLN	Q2FXN4	Isocitrate dehydrogenase [NADP] (EC 1.1.1.42)	SAOUHSC_01801	3920442	13	4.2577	1360.68	Q2FXN4	yes	yes	2	3.612e-05	136.6	691620	143530	97633	76659	188310	65904	26733	51139	41708	0
TAEKITQGTEGLNVPN	Q2FXN4	Isocitrate dehydrogenase [NADP] (EC 1.1.1.42)	SAOUHSC_01801	3920442	16	4.2577	1670.85	Q2FXN4	yes	yes	2	0.014441	92.773	267820	79002	9191.8	44191	43402	82051	0	9987.7	0	0
ATQMLDSMQR	Q2FXM9	Pyruvate kinase (PK) (EC 2.7.1.40)	pyk SAOUHSC_01806	3919276	10	5.79	1179.54	Q2FXM9	yes	yes	2	0.023712	107.03	118890	74136	0	44752	0	0	0	0	0	0
IIAVTPSEETARQ	Q2FXM9	Pyruvate kinase (PK) (EC 2.7.1.40)	pyk SAOUHSC_01806	3919276	13	4.2577	1413.75	Q2FXM9	yes	yes	2	0.00017873	124.12	114640	75603	0	39039	0	0	0	0	0	0
SGETAAGLYPEEAVK	Q2FXM9	Pyruvate kinase (PK) (EC 2.7.1.40)	pyk SAOUHSC_01806	3919276	15	3.9798	1520.74	Q2FXM9	yes	yes	2	4.1175e-08	135.72	172240	172240	0	0	0	0	0	0	0	0
TEENGITSPSA	Q2FXM9	Pyruvate kinase (PK) (EC 2.7.1.40)	pyk SAOUHSC_01806	3919276	11	3.6135	1104.49	Q2FXM9	yes	yes	2	0.032406	92.866	62492	0	0	0	0	0	0	0	34960	27532
VEGTPEKF	Q2FXM9	Pyruvate kinase (PK) (EC 2.7.1.40)	pyk SAOUHSC_01806	3919276	8	4.2577	905.449	Q2FXM9	yes	yes	2	0.044224	128.69	141270	0	0	0	0	0	0	0	51975	89299
MKKIAVLTSGGD	Q2FXM8	ATP-dependent 6-phosphofructokinase (ATP-PFK) (Phosphofructokinase) (EC 2.7.1.11) (Phosphohexokinase)	pfkA SAOUHSC_01807	3919277	12	8.9961	1218.66	Q2FXM8	yes	yes	2	0.00038641	136.53	52028	0	0	52028	0	0	0	0	0	0
AISEQDAQASIK	Q2FXM1	Uncharacterized protein	SAOUHSC_01814	3919284	12	4.184	1259.64	Q2FXM1	yes	yes	2	7.6123e-45	247.67	1080300	784890	44281	251090	0	0	0	0	0	0
AISEQDAQASIKA	Q2FXM1	Uncharacterized protein	SAOUHSC_01814	3919284	13	4.184	1330.67	Q2FXM1	yes	yes	2	0.0039619	104.41	96616	80442	0	0	16174	0	0	0	0	0
IIVRGNAKEE	Q2FXM1	Uncharacterized protein	SAOUHSC_01814	3919284	10	5.9863	1127.63	Q2FXM1	yes	yes	2	4.1599e-05	157.66	910330	910330	0	0	0	0	0	0	0	0
VQILKPGESVQF	Q2FXM0	UPF0173 metal-dependent hydrolase SAOUHSC_01815	SAOUHSC_01815	3919285	12	5.8613	1343.74	Q2FXM0	yes	yes	2	0.0023632	111.12	218280	32187	0	4443.1	0	181650	0	0	0	0
FQPQVATTQLREKYQN	Q2FXL6	Putative universal stress protein SAOUHSC_01819	SAOUHSC_01819	3919289	16	8.7564	1950	Q2FXL6	yes	yes	2	1.22e-19	161.24	198480	11693	0	0	0	186780	0	0	0	0
SGTSGLNAVER	Q2FXL6	Putative universal stress protein SAOUHSC_01819	SAOUHSC_01819	3919289	11	5.8614	1089.54	Q2FXL6	yes	yes	2	0.00044609	144.1	240750	197480	0	43261	0	0	0	0	0	0
TTQLREKYQN	Q2FXL6	Putative universal stress protein SAOUHSC_01819	SAOUHSC_01819	3919289	10	8.7564	1279.65	Q2FXL6	yes	yes	2	0.044432	92.538	673810	244620	137310	276210	0	0	0	0	15665	0
AALAAYKNI	Q2FXL3	Thiol peroxidase (Tpx) (EC 1.11.1.15) (Peroxiredoxin tpx) (Prx) (Thioredoxin peroxidase)	tpx SAOUHSC_01822	3919292	9	8.7571	933.528	Q2FXL3	yes	yes	2	0.0030332	143.61	4269400	0	788900	814700	627110	678460	454370	466290	302060	137510
FDAALAAYKNI	Q2FXL3	Thiol peroxidase (Tpx) (EC 1.11.1.15) (Peroxiredoxin tpx) (Prx) (Thioredoxin peroxidase)	tpx SAOUHSC_01822	3919292	11	5.7894	1195.62	Q2FXL3	yes	yes	2	0.007422	110.84	265690	37368	0	12102	0	216220	0	0	0	0
ISLSGTGKELE	Q2FXK6	30S ribosomal protein S4	rpsD SAOUHSC_01829	3921779	11	4.2577	1132.6	Q2FXK6	yes	yes	2	9.8443e-08	172.17	1335600	986060	71142	259340	0	0	0	19037	0	0
DAAINPGNSGGALV	Q2FXJ6	Uncharacterized protein	SAOUHSC_01838	3921788	14	3.7498	1254.62	Q2FXJ6	yes	yes	2	0.027461	87.498	143140	27242	48828	67068	0	0	0	0	0	0
DAAINPGNSGGALVDI	Q2FXJ6	Uncharacterized protein	SAOUHSC_01838	3921788	16	3.4918	1482.73	Q2FXJ6	yes	yes	2	5.6146e-07	123.76	240700	91008	32790	76836	13161	26902	0	0	0	0
DAETTGGNTKVSVLQT	Q2FXJ6	Uncharacterized protein	SAOUHSC_01838	3921788	16	4.184	1619.8	Q2FXJ6	yes	yes	2	6.856e-26	169.37	268840	80505	65336	110940	0	0	0	0	12063	0
ETTGGNTKVSVLQT	Q2FXJ6	Uncharacterized protein	SAOUHSC_01838	3921788	14	5.8613	1433.74	Q2FXJ6	yes	yes	2	1.3483e-26	184.34	585230	96152	191200	276450	0	0	0	0	21431	0
GGNTKVSVLQT	Q2FXJ6	Uncharacterized protein	SAOUHSC_01838	3921788	11	9.15	1102.6	Q2FXJ6	yes	yes	2	0.0045634	120.77	330440	22359	166730	113200	0	0	0	0	28152	0
NSSKVQTGDSVFA	Q2FXJ6	Uncharacterized protein	SAOUHSC_01838	3921788	13	5.7899	1338.64	Q2FXJ6	yes	yes	2	1.1927e-14	176.25	7621900	1476400	1464800	3358800	315730	337690	187600	338250	104420	38196
NSVTSGIISA	Q2FXJ6	Uncharacterized protein	SAOUHSC_01838	3921788	10	5.55	947.492	Q2FXJ6	yes	yes	2	0.0033107	133.23	850610	94637	256530	312640	44366	41102	28999	13945	58393	0
VINMQKASSVDDL	Q2FXJ6	Uncharacterized protein	SAOUHSC_01838	3921788	13	4.109	1418.71	Q2FXJ6	yes	yes	2	1.9243e-33	216.68	691760	281280	195030	149150	0	66296	0	0	0	0
VIYQINNNSA	Q2FXJ6	Uncharacterized protein	SAOUHSC_01838	3921788	10	5.5494	1134.57	Q2FXJ6	yes	yes	2	4.873e-07	126.31	72757	58181	0	0	14576	0	0	0	0	0
NNQIETLQYK	Q2FXI5	Uncharacterized protein	SAOUHSC_01861	3920539	10	5.8607	1249.63	Q2FXI5	yes	yes	2	2.1622e-13	202.56	924030	160730	137520	243960	98184	90598	43356	62516	51640	35517
LSNNSFLNN	Q2FXG3	Uncharacterized protein	SAOUHSC_01884	3920833	9	5.55	1021.48	Q2FXG3	yes	yes	2	0.0035309	140.83	263760	208260	18861	36637	0	0	0	0	0	0
DLSKYQGIDKN	Q2FXF4	Uncharacterized protein	SAOUHSC_01895	3920842	11	5.9017	1279.64	Q2FXF4	yes	yes	2	0.014862	103.91	99628	44122	18501	37006	0	0	0	0	0	0
GALDKDPIKT	Q2FXF4	Uncharacterized protein	SAOUHSC_01895	3920842	10	5.9023	1056.58	Q2FXF4	yes	yes	2,3	0.0039024	127.83	1464100	290860	224950	880850	0	45644	21742	0	0	0
LNDAAKKQIN	Q2FXF4	Uncharacterized protein	SAOUHSC_01895	3920842	10	8.9961	1113.61	Q2FXF4	yes	yes	2,3	8.1952e-20	222.28	2988900	932770	898280	1157900	0	0	0	0	0	0
LNDAAKKQINNY	Q2FXF4	Uncharacterized protein	SAOUHSC_01895	3920842	12	8.7213	1390.72	Q2FXF4	yes	yes	3	0.019446	94.692	491580	417910	0	73678	0	0	0	0	0	0
LVDRPTLL	Q2FXF4	Uncharacterized protein	SAOUHSC_01895	3920842	8	5.79	925.56	Q2FXF4	yes	yes	2	0.035367	133.86	2408500	793710	727680	593660	71647	145070	48283	0	28483	0
NVTLNDAAKK	Q2FXF4	Uncharacterized protein	SAOUHSC_01895	3920842	10	8.9961	1072.59	Q2FXF4	yes	yes	2	0.04227	93.556	339550	312380	27172	0	0	0	0	0	0	0
SSTDQNTLYSM	Q2FXF4	Uncharacterized protein	SAOUHSC_01895	3920842	11	3.7498	1245.52	Q2FXF4	yes	yes	2	9.1253e-05	152.54	2209000	276260	639800	701890	278100	114150	87432	25289	78162	7881.2
STDQNTLYS	Q2FXF4	Uncharacterized protein	SAOUHSC_01895	3920842	9	3.7498	1027.45	Q2FXF4	yes	yes	2	1.6364e-31	248.81	2492000	623370	664280	524630	164950	122970	58357	97532	107440	128440
STDQNTLYSM	Q2FXF4	Uncharacterized protein	SAOUHSC_01895	3920842	10	3.7498	1158.49	Q2FXF4	yes	yes	2	0.0036193	130.41	344780	63488	82667	89319	36783	25893	0	26798	11858	7970.2
TLNDAAKKQIN	Q2FXF4	Uncharacterized protein	SAOUHSC_01895	3920842	11	8.9961	1214.66	Q2FXF4	yes	yes	2	2.3037e-76	166.97	293390	0	0	293390	0	0	0	0	0	0
VGALDKDPIKT	Q2FXF4	Uncharacterized protein	SAOUHSC_01895	3920842	11	5.9023	1155.65	Q2FXF4	yes	yes	3	0.035528	91.658	333090	79020	78155	175910	0	0	0	0	0	0
DGADIEEMK	Q2FXE8	Transaldolase (EC 2.2.1.2)	SAOUHSC_01901	3920848	9	3.7378	1006.43	Q2FXE8	yes	yes	2	4.0429e-06	190.02	542930	329320	55674	125400	0	0	0	32535	0	0
AVNLYDYANQ	Q2FXA0	UPF0342 protein SAOUHSC_01977	SAOUHSC_01977	3920453	10	3.7498	1169.54	Q2FXA0	yes	yes	2	0.0040257	126.71	184550	22509	20666	19346	42793	48901	13609	9259.5	0	7462.3
IEKDENISA	Q2FXA0	UPF0342 protein SAOUHSC_01977	SAOUHSC_01977	3920453	9	3.9274	1017.5	Q2FXA0	yes	yes	2	0.025685	92.538	0	0	0	0	0	0	0	0	0	0
NEESKKLFD	Q2FXA0	UPF0342 protein SAOUHSC_01977	SAOUHSC_01977	3920453	9	4.4258	1108.54	Q2FXA0	yes	yes	2	0.010651	128.86	109990	109990	0	0	0	0	0	0	0	0
QQKQMQGEEIAEED	Q2FXA0	UPF0342 protein SAOUHSC_01977	SAOUHSC_01977	3920453	14	3.6718	1661.72	Q2FXA0	yes	yes	2	8.5968e-08	136.93	148410	87185	0	61223	0	0	0	0	0	0
SQVFQEIN	Q2FXA0	UPF0342 protein SAOUHSC_01977	SAOUHSC_01977	3920453	8	3.8497	963.466	Q2FXA0	yes	yes	2	0.023481	141.48	339710	188480	59276	76778	15176	0	0	0	0	0
YANQLEQA	Q2FXA0	UPF0342 protein SAOUHSC_01977	SAOUHSC_01977	3920453	8	3.8497	935.435	Q2FXA0	yes	yes	2	0.036644	133.12	292560	150240	84175	58142	0	0	0	0	0	0
AISLADKSTRQ	Q2FX11	Uncharacterized protein	SAOUHSC_02096	3921168	11	9.1455	1188.65	Q2FX11	yes	yes	2	1.9685e-05	154.24	265940	265940	0	0	0	0	0	0	0	0
GAISLADKSTRQ	Q2FX11	Uncharacterized protein	SAOUHSC_02096	3921168	12	9.1455	1245.67	Q2FX11	yes	yes	2	4.3169e-122	183.99	0	0	0	0	0	0	0	0	0	0
GPILTTKIEEE	Q2FX05	Methionine aminopeptidase (MAP) (MetAP) (EC 3.4.11.18) (Peptidase M)	map SAOUHSC_02102	3921174	11	3.9798	1228.66	Q2FX05	yes	yes	2	1.006e-07	171.92	5014900	1448000	698740	865840	520960	679540	363990	184390	124440	129000
AEPNSNTNVIDLA	Q2FWZ0	Aspartyl/glutamyl-tRNA(Asn/Gln) amidotransferase subunit B (Asp/Glu-ADT subunit B) (EC 6.3.5.-)	gatB SAOUHSC_02116	3921188	13	3.55	1356.65	Q2FWZ0	yes	yes	2	0.0047089	102.97	107660	85955	21702	0	0	0	0	0	0	0
AKQNDSADTEGVEPTY	Q2FWY8	Aspartyl/glutamyl-tRNA(Asn/Gln) amidotransferase subunit C (Asp/Glu-ADT subunit C) (EC 6.3.5.-)	gatC SAOUHSC_02118	3921190	16	3.7378	1723.75	Q2FWY8	yes	yes	2	0.00024551	109.79	133160	35349	33835	63973	0	0	0	0	0	0
ANTLESILD	Q2FWY8	Aspartyl/glutamyl-tRNA(Asn/Gln) amidotransferase subunit C (Asp/Glu-ADT subunit C) (EC 6.3.5.-)	gatC SAOUHSC_02118	3921190	9	3.55	974.492	Q2FWY8	yes	yes	2	0.010947	128.38	77514	67954	0	9560.6	0	0	0	0	0	0
FAKQNDSADTEGVEPTY	Q2FWY8	Aspartyl/glutamyl-tRNA(Asn/Gln) amidotransferase subunit C (Asp/Glu-ADT subunit C) (EC 6.3.5.-)	gatC SAOUHSC_02118	3921190	17	3.7378	1870.82	Q2FWY8	yes	yes	2	0.0027163	97.291	72234	52014	0	0	0	20220	0	0	0	0
GQFKVPTIMNEEDA	Q2FWY8	Aspartyl/glutamyl-tRNA(Asn/Gln) amidotransferase subunit C (Asp/Glu-ADT subunit C) (EC 6.3.5.-)	gatC SAOUHSC_02118	3921190	14	3.9274	1577.74	Q2FWY8	yes	yes	2	0.0025545	101.62	44085	0	0	0	0	44085	0	0	0	0
LKNAKETEDGQ	Q2FWY8	Aspartyl/glutamyl-tRNA(Asn/Gln) amidotransferase subunit C (Asp/Glu-ADT subunit C) (EC 6.3.5.-)	gatC SAOUHSC_02118	3921190	11	4.4258	1231.6	Q2FWY8	yes	yes	2	4.9986e-15	125.72	0	0	0	0	0	0	0	0	0	0
SADTEGVEPTYHVLD	Q2FWY8	Aspartyl/glutamyl-tRNA(Asn/Gln) amidotransferase subunit C (Asp/Glu-ADT subunit C) (EC 6.3.5.-)	gatC SAOUHSC_02118	3921190	15	3.7371	1631.73	Q2FWY8	yes	yes	2	2.8412e-06	122.46	216890	171310	11903	33675	0	0	0	0	0	0
TKVTREEVE	Q2FWY8	Aspartyl/glutamyl-tRNA(Asn/Gln) amidotransferase subunit C (Asp/Glu-ADT subunit C) (EC 6.3.5.-)	gatC SAOUHSC_02118	3921190	9	4.4788	1089.57	Q2FWY8	yes	yes	2	4.8935e-18	142.83	0	0	0	0	0	0	0	0	0	0
IISDIESKNN	Q2FWX6	Uncharacterized protein	SAOUHSC_02145	3921842	10	4.184	1131.58	Q2FWX6	yes	yes	2	5.4505e-37	242.59	1684300	1232300	126010	245870	0	35338	29849	0	14960	0
NFDGGIGSPINN	Q2FWX2	Uncharacterized protein	SAOUHSC_02149	3921846	12	3.7498	1203.55	Q2FWX2	yes	yes	2	3.5965e-07	158.3	314260	106140	84010	124110	0	0	0	0	0	0
PEDDSRIK	Q2FWX1	Uncharacterized protein	SAOUHSC_02150	3921847	8	4.3699	958.472	Q2FWX1	yes	yes	2	3.3278e-33	157.68	0	0	0	0	0	0	0	0	0	0
IVVQASSNGKN	Q2FWX0	Uncharacterized protein	SAOUHSC_02151	3921848	11	9.15	1115.59	Q2FWX0	yes	yes	2	2.0477e-15	211.64	1254200	528630	457130	268460	0	0	0	0	0	0
TDKMISSN	Q2FWX0	Uncharacterized protein	SAOUHSC_02151	3921848	8	5.7899	894.412	Q2FWX0	yes	yes	2	0.012307	156.83	1177500	0	0	1177500	0	0	0	0	0	0
EAFDNGASDKLLS	Q2FWP1	Phospholipase C (EC 3.1.4.3) (Beta-hemolysin) (Beta-toxin) (Sphingomyelinase) (SMase)	hlb SAOUHSC_02163/SAOUHSC_02240		13	3.8759	1365.64	Q2FWP1	yes	yes	2	1.7791e-06	143.31	1183500	450310	157210	544170	0	0	0	31848	0	0
FLTEPNYDKET	Q2FWP0	Uncharacterized leukocidin-like protein 1	SAOUHSC_02241	3919663	11	3.9274	1355.62	Q2FWP0	yes	yes	2	0.0018744	133.23	76135	11993	8436	55706	0	0	0	0	0	0
SYNQQNYDTIA	Q2FWN9	Uncharacterized leukocidin-like protein 2	SAOUHSC_02243	3919664	11	3.7498	1315.57	Q2FWN9	yes	yes	2	0.019574	99.522	71918	0	17451	54467	0	0	0	0	0	0
TAKVDSTFS	Q2FWN9	Uncharacterized leukocidin-like protein 2	SAOUHSC_02243	3919664	9	5.7899	954.466	Q2FWN9	yes	yes	2	0.014858	123.86	922890	0	254410	440890	0	0	0	165710	42990	18886
MLRGVDQLA	Q2FWN4	60 kDa chaperonin (GroEL protein) (Protein Cpn60)	groL groEL SAOUHSC_02254	3919674	9	5.79	1001.53	Q2FWN4	yes	yes	2	0.035117	109.11	396030	343980	18294	33757	0	0	0	0	0	0
MLRGVDQLAN	Q2FWN4	60 kDa chaperonin (GroEL protein) (Protein Cpn60)	groL groEL SAOUHSC_02254	3919674	10	5.79	1115.58	Q2FWN4	yes	yes	2	0.026957	104.22	472810	450960	0	21848	0	0	0	0	0	0
NDQPNMGGMPGMM	Q2FWN4	60 kDa chaperonin (GroEL protein) (Protein Cpn60)	groL groEL SAOUHSC_02254	3919674	13	3.7498	1378.51	Q2FWN4	yes	yes	2	0.0038304	105.17	171200	16988	13489	24129	44871	27145	25627	11667	7288.7	0
IIIHMLQNG	Q2FWN2	Abortive infection protein	SAOUHSC_02256	3919676	9	7.0004	1037.57	Q2FWN2	yes	yes	2	0.004438	139.31	93238	0	0	0	0	0	0	0	31266	61972
NETYLSSNSTNE	Q2FWI7	Antitoxin MazE	mazE SAOUHSC_02304	3919175	12	3.6135	1357.56	Q2FWI7	yes	yes	2	2.9635e-07	160.18	253540	0	24935	31133	0	0	0	39783	93207	64482
MLLCCKEVMAMLIV	Q2FWH8	Uncharacterized protein	SAOUHSC_02313	3920938	14	5.8204	1709.84	Q2FWH8	yes	yes	3	0.043781	35.523	68356	68356	0	0	0	0	0	0	0	0
AGDRLFGTK	Q2FWE6	Uracil phosphoribosyltransferase (EC 2.4.2.9) (UMP pyrophosphorylase) (UPRTase)	upp SAOUHSC_02353	3919396	9	9.1455	963.514	Q2FWE6	yes	yes	2	0.0034843	141.1	2288600	703040	152720	413350	219090	253220	119940	100470	271960	54843
DAGDRLFGTK	Q2FWE6	Uracil phosphoribosyltransferase (EC 2.4.2.9) (UMP pyrophosphorylase) (UPRTase)	upp SAOUHSC_02353	3919396	10	5.9024	1078.54	Q2FWE6	yes	yes	2	0.0012943	147.37	645430	379730	46115	198680	0	0	0	0	0	20899
MKQGIHPE	Q2FWD8	50S ribosomal protein L31 type B	rpmE2 SAOUHSC_02361	3919404	8	7.0017	938.464	Q2FWD8	yes	yes	2	0.012352	153.78	1783700	1754100	29553	0	0	0	0	0	0	0
AAEVVHSTFD	Q2FWD7	Transcription termination factor Rho (EC 3.6.4.-) (ATP-dependent helicase Rho)	rho SAOUHSC_02362	3919405	10	4.1808	1074.5	Q2FWD7	yes	yes	2	0.0097487	120.12	159070	0	0	145870	0	0	0	13200	0	0
SQEENAPVILG	Q2FWD3	Uncharacterized protein	SAOUHSC_02366	3919409	11	3.6135	1155.58	Q2FWD3	yes	yes	2	0.0048536	119.68	303860	55860	42785	111750	27018	26903	28000	11541	0	0
TAKINVNTENQIA	Q2FWD3	Uncharacterized protein	SAOUHSC_02366	3919409	13	5.8613	1414.74	Q2FWD3	yes	yes	2	1.5113e-06	145	2277600	1194300	362830	720520	0	0	0	0	0	0
EEVFEDEEDFND	Q2FWD0	Probable DNA-directed RNA polymerase subunit delta (RNAP delta factor)	rpoE SAOUHSC_02369	3919412	12	3.0498	1515.55	Q2FWD0	yes	yes	2	0.0022984	111.94	122270	6220.8	0	0	8367.3	107680	0	0	0	0
PEDEQVEEEIN	Q2FWD0	Probable DNA-directed RNA polymerase subunit delta (RNAP delta factor)	rpoE SAOUHSC_02369	3919412	11	3.1946	1329.56	Q2FWD0	yes	yes	2	0.019598	99.5	595650	50252	24131	111130	36042	90303	46431	66775	74012	96578
ALRDVTGTVNS	Q2FWC1	Pyrimidine-nucleoside phosphorylase (PYNP) (Py-NPase) (EC 2.4.2.2)	pdp pyn SAOUHSC_02377	3919420	11	5.79	1131.59	Q2FWC1	yes	yes	2	0.0035258	124.67	125020	97542	0	27476	0	0	0	0	0	0
SNQQDVVKELN	Q2FWB7	Uncharacterized protein	SAOUHSC_02381	3919424	11	4.184	1272.63	Q2FWB7	yes	yes	2	0.00053048	142.1	371460	21418	37126	108110	102320	62214	0	40277	0	0
DNAKVKLTD	Q2FWB6	Uncharacterized protein	SAOUHSC_02382	3919425	9	5.9023	1002.53	Q2FWB6	yes	yes	2	0.0016104	117.7	2262000	0	687370	1074800	0	0	499850	0	0	0
ALTQFENETD	Q2FWB1	Uncharacterized protein	SAOUHSC_02387	3919604	10	3.4246	1166.51	Q2FWB1	yes	yes	2	1.8836e-09	192.12	2160700	199780	293090	420530	349740	496160	401400	0	0	0
IKDALTQFENETD	Q2FWB1	Uncharacterized protein	SAOUHSC_02387	3919604	13	3.7378	1522.72	Q2FWB1	yes	yes	2	3.9107e-05	136.3	89104	0	0	0	0	89104	0	0	0	0
MFKGGDTSHNLNM	Q2FWA9	Cation efflux family protein, putative	SAOUHSC_02389	3919606	13	7.0012	1450.63	Q2FWA9	yes	yes	2	0.022476	91.961	99150	11692	87458	0	0	0	0	0	0	0
DNTTKTMTSDKPEDNQPK	Q2FWA8	Lytic regulatory protein, putative	SAOUHSC_02390	3919607	18	4.4987	2048.93	Q2FWA8	yes	yes	3	2.0028e-19	160.8	2399400	220270	373340	561550	495760	273660	293010	140810	0	40961
NTTKTMTSDKPEDNQPK	Q2FWA8	Lytic regulatory protein, putative	SAOUHSC_02390	3919607	17	6.0102	1933.91	Q2FWA8	yes	yes	3	2.5327e-83	153.79	0	0	0	0	0	0	0	0	0	0
SLNDNTTKTMTSDKPEDNQPK	Q2FWA8	Lytic regulatory protein, putative	SAOUHSC_02390	3919607	21	4.4987	2363.09	Q2FWA8	yes	yes	3	1.8869e-12	142.94	745560	302540	0	284790	105780	52451	0	0	0	0
TTKTMTSDKPEDNQPK	Q2FWA8	Lytic regulatory protein, putative	SAOUHSC_02390	3919607	16	6.0102	1819.86	Q2FWA8	yes	yes	3	4.4552e-06	111.12	676460	154990	84007	152400	0	191560	0	33646	59848	0
QAQIDQAPLNPDTTN	Q2FW95	Uncharacterized protein	SAOUHSC_02404	3919619	15	3.4918	1624.77	Q2FW95	yes	yes	2	0.0028996	97.273	22594000	0	0	0	247620	11635000	6439300	2021900	1993000	258020
AMTVKKDN	Q2FW79	UPF0457 protein SAOUHSC_02425	SAOUHSC_02425	3919635	8	8.9961	905.464	Q2FW79	yes	yes	2	0.0029141	123.72	0	0	0	0	0	0	0	0	0	0
AMTVKKDNNEVR	Q2FW79	UPF0457 protein SAOUHSC_02425	SAOUHSC_02425	3919635	12	8.994	1403.72	Q2FW79	yes	yes	3	0.030711	90.685	137730	52498	20014	0	0	0	0	0	65215	0
DQKVYNELTK	Q2FW79	UPF0457 protein SAOUHSC_02425	SAOUHSC_02425	3919635	10	5.9475	1236.63	Q2FW79	yes	yes	2,3	2.6092e-27	227.94	10301000	944110	1566400	2009100	2085400	2118600	652460	602040	188370	134930
DSKDVSRIGS	Q2FW79	UPF0457 protein SAOUHSC_02425	SAOUHSC_02425	3919635	10	5.9024	1062.53	Q2FW79	yes	yes	2	9.3977e-05	108.47	0	0	0	0	0	0	0	0	0	0
EIKNITQD	Q2FW79	UPF0457 protein SAOUHSC_02425	SAOUHSC_02425	3919635	8	4.184	959.492	Q2FW79	yes	yes	2	0.031999	135.83	693480	0	0	30296	40682	107040	102890	121950	155610	135010
EIKNITQDQD	Q2FW79	UPF0457 protein SAOUHSC_02425	SAOUHSC_02425	3919635	10	3.8759	1202.58	Q2FW79	yes	yes	2	0.003247	133.81	355380	27402	0	30012	47037	53416	40451	49844	55283	51932
IDTEDHEY	Q2FW79	UPF0457 protein SAOUHSC_02425	SAOUHSC_02425	3919635	8	3.7371	1020.4	Q2FW79	yes	yes	2	0.00016463	194.27	666020	0	0	0	0	147570	134970	91608	129970	161890
IKNITQDQDIH	Q2FW79	UPF0457 protein SAOUHSC_02425	SAOUHSC_02425	3919635	11	5.3868	1323.68	Q2FW79	yes	yes	3	0.011484	107.06	240910	0	0	0	42641	57714	72542	30384	28877	8751.2
QNDQKVYN	Q2FW79	UPF0457 protein SAOUHSC_02425	SAOUHSC_02425	3919635	8	5.7894	1007.47	Q2FW79	yes	yes	2	0.021553	143.61	472590	0	0	472590	0	0	0	0	0	0
TQNDQKVYN	Q2FW79	UPF0457 protein SAOUHSC_02425	SAOUHSC_02425	3919635	9	5.7894	1108.51	Q2FW79	yes	yes	2	0.0027394	145.25	214050	0	0	196240	17813	0	0	0	0	0
TQNDQKVYNELTK	Q2FW79	UPF0457 protein SAOUHSC_02425	SAOUHSC_02425	3919635	13	5.9475	1579.78	Q2FW79	yes	yes	3	0.020298	92.19	644460	23296	0	54287	0	507680	59199	0	0	0
ENNNQERQGLQ	Q2FW66	Alkaline shock protein 23	asp23 SAOUHSC_02441	3919005	11	4.2577	1328.61	Q2FW66	yes	yes	2	1.2347e-29	240.85	68731000	1097500	1044700	20611000	1561400	20069000	6191700	5930800	9666600	2557800
FSDEVVEK	Q2FW66	Alkaline shock protein 23	asp23 SAOUHSC_02441	3919005	8	3.9274	951.455	Q2FW66	yes	yes	2	0.012218	156.51	1194500	0	37503	0	864360	176120	116540	0	0	0
GESAPKIF	Q2FW66	Alkaline shock protein 23	asp23 SAOUHSC_02441	3919005	8	5.8613	847.444	Q2FW66	yes	yes	2	0.041599	130.22	275840	32832	8939.6	0	112080	0	59364	0	0	62629
KNNENNNQERQGLQ	Q2FW66	Alkaline shock protein 23	asp23 SAOUHSC_02441	3919005	14	5.9863	1684.79	Q2FW66	yes	yes	2,3	1.2374e-05	119.39	14011000	528790	354820	320720	2073000	2687800	4930200	376020	2694900	44621
NENNNQERQGLQ	Q2FW66	Alkaline shock protein 23	asp23 SAOUHSC_02441	3919005	12	4.2577	1442.65	Q2FW66	yes	yes	2	0	253.79	253210000	31238000	22556000	21428000	15809	56037000	0	76662000	33213000	12063000
NNENNNQERQGLQ	Q2FW66	Alkaline shock protein 23	asp23 SAOUHSC_02441	3919005	13	4.2577	1556.69	Q2FW66	yes	yes	2	1.0031e-53	251.24	1559800	721230	362420	476130	0	0	0	0	0	0
NNNQERQGLQ	Q2FW66	Alkaline shock protein 23	asp23 SAOUHSC_02441	3919005	10	5.8614	1199.56	Q2FW66	yes	yes	2	3.0119e-07	179.42	353160	0	0	353160	0	0	0	0	0	0
NNQERQGLQ	Q2FW66	Alkaline shock protein 23	asp23 SAOUHSC_02441	3919005	9	5.8614	1085.52	Q2FW66	yes	yes	2	1.1062e-06	195.79	26374000	0	26527	26348000	0	0	0	0	0	0
SDEVVEKIA	Q2FW66	Alkaline shock protein 23	asp23 SAOUHSC_02441	3919005	9	3.9274	988.508	Q2FW66	yes	yes	2	0.0086858	132.01	1248000	51593	105890	244360	0	255710	260130	168310	113600	48390
TVDNNKAKQAY	Q2FW66	Alkaline shock protein 23	asp23 SAOUHSC_02441	3919005	11	8.7213	1250.63	Q2FW66	yes	yes	2	0.0068635	112.13	126480	41677	51269	33534	0	0	0	0	0	0
TVDNNKAKQAYD	Q2FW66	Alkaline shock protein 23	asp23 SAOUHSC_02441	3919005	12	5.9017	1365.65	Q2FW66	yes	yes	2,3	1.804e-19	203.61	51700000	6343700	4721900	4484800	6312600	7693700	0	10641000	7060900	4441500
TVDNNKAKQAYDN	Q2FW66	Alkaline shock protein 23	asp23 SAOUHSC_02441	3919005	13	5.9017	1479.7	Q2FW66	yes	yes	2,3	1.6791e-66	265.22	53498000	4171900	3255000	3775700	10055000	10875000	8956900	6568900	3966100	1874100
TVDNNKAKQAYDNQ	Q2FW66	Alkaline shock protein 23	asp23 SAOUHSC_02441	3919005	14	5.9017	1607.75	Q2FW66	yes	yes	2	5.6284e-66	166.86	2275600	430620	184100	0	0	756220	904650	0	0	0
TVDNNKAKQAYDNQTGVN	Q2FW66	Alkaline shock protein 23	asp23 SAOUHSC_02441	3919005	18	5.9017	1978.93	Q2FW66	yes	yes	2,3	5.3158e-40	197.75	37923000	10471000	1597900	2334600	2383100	14064000	3827500	2816800	428080	0
AFDTVAKYD	Q2FW64	Uncharacterized protein	SAOUHSC_02443	3919007	9	4.109	1028.48	Q2FW64	yes	yes	2	0.015154	123.63	270830	236980	0	33850	0	0	0	0	0	0
DQKTSGPRVL	Q2FW64	Uncharacterized protein	SAOUHSC_02443	3919007	10	9.1455	1099.6	Q2FW64	yes	yes	3	0.023504	107.21	975390	871960	0	32107	11997	0	0	59331	0	0
DQVRQPNV	Q2FW64	Uncharacterized protein	SAOUHSC_02443	3919007	8	5.79	954.488	Q2FW64	yes	yes	2	0.018862	146.58	1074700	123120	78330	127170	75595	86234	135480	176530	146180	126100
DQVRQPNVV	Q2FW64	Uncharacterized protein	SAOUHSC_02443	3919007	9	5.79	1053.56	Q2FW64	yes	yes	2	0.018472	120.99	2299700	262010	134080	116970	525050	315420	290100	298600	261320	96155
VNVRDQKTSGPRVL	Q2FW64	Uncharacterized protein	SAOUHSC_02443	3919007	14	11.4779	1567.88	Q2FW64	yes	yes	3	0.055714	65.043	151810	151810	0	0	0	0	0	0	0	0
VPNNVQVQS	Q2FW64	Uncharacterized protein	SAOUHSC_02443	3919007	9	5.55	983.504	Q2FW64	yes	yes	2	0.0023919	147.19	840530	68074	23459	0	91121	59087	58984	133050	238360	168390
YDQVRQPNV	Q2FW64	Uncharacterized protein	SAOUHSC_02443	3919007	9	5.7895	1117.55	Q2FW64	yes	yes	2	0.00080107	128.86	773060	92265	20255	86719	0	179230	149620	125950	85188	33825
YDQVRQPNVV	Q2FW64	Uncharacterized protein	SAOUHSC_02443	3919007	10	5.7895	1216.62	Q2FW64	yes	yes	2	0.00062724	151.22	2002700	191830	89059	250600	0	459640	389940	386190	93135	142330
EDETTQTALQKL	Q2FW33	50S ribosomal protein L17	rplQ SAOUHSC_02484	3920861	12	3.9274	1375.68	Q2FW33	yes	yes	2	0.0019727	116.03	205620	76872	6422.8	60889	0	44068	0	17369	0	0
EILNEDETTQTALQK	Q2FW33	50S ribosomal protein L17	rplQ SAOUHSC_02484	3920861	15	3.7781	1731.85	Q2FW33	yes	yes	2	2.9444e-106	291.2	1878200	629460	83377	258100	215520	375930	210400	62384	22629	20364
IISERIETTE	Q2FW33	50S ribosomal protein L17	rplQ SAOUHSC_02484	3920861	10	3.9798	1189.62	Q2FW33	yes	yes	2	5.8242e-07	138.25	822550	122600	0	65658	0	560550	0	0	40523	33220
ILNEDETTQ	Q2FW33	50S ribosomal protein L17	rplQ SAOUHSC_02484	3920861	9	3.4246	1061.49	Q2FW33	yes	yes	2	0.017825	121.5	595800	32162	14265	29795	124240	73666	146360	76971	41790	56552
ILNEDETTQT	Q2FW33	50S ribosomal protein L17	rplQ SAOUHSC_02484	3920861	10	3.4246	1162.54	Q2FW33	yes	yes	2	0.0010881	148.56	612510	35361	18840	0	0	168370	149820	83856	55287	100970
ILNEDETTQTA	Q2FW33	50S ribosomal protein L17	rplQ SAOUHSC_02484	3920861	11	3.4246	1233.57	Q2FW33	yes	yes	2	4.0952e-08	178.81	1043000	0	0	103280	129750	248810	275510	135600	150030	0
ILNEDETTQTALQK	Q2FW33	50S ribosomal protein L17	rplQ SAOUHSC_02484	3920861	14	3.9274	1602.81	Q2FW33	yes	yes	2,3	3.1152e-108	299.25	14177000	2376600	1192900	3460500	1550600	2588200	1323900	999790	402330	282270
ISERIETTE	Q2FW33	50S ribosomal protein L17	rplQ SAOUHSC_02484	3920861	9	3.9798	1076.54	Q2FW33	yes	yes	2	0.026048	114.97	1540900	98466	0	57849	303780	448620	408440	112490	69247	41990
LNEDETTQT	Q2FW33	50S ribosomal protein L17	rplQ SAOUHSC_02484	3920861	9	3.4246	1049.45	Q2FW33	yes	yes	2	0.0010312	155.84	744090	0	0	0	88043	199810	276210	0	144090	35940
LNEDETTQTA	Q2FW33	50S ribosomal protein L17	rplQ SAOUHSC_02484	3920861	10	3.4246	1120.49	Q2FW33	yes	yes	2	9.2072e-08	182.28	949190	0	0	0	133920	233370	288270	118670	91177	83773
LNEDETTQTALQK	Q2FW33	50S ribosomal protein L17	rplQ SAOUHSC_02484	3920861	13	3.9274	1489.73	Q2FW33	yes	yes	2	0	299.04	8252900	1141800	751540	1237300	0	1859200	1617900	918200	546950	179970
NEDETTQTAL	Q2FW33	50S ribosomal protein L17	rplQ SAOUHSC_02484	3920861	10	3.4246	1120.49	Q2FW33	yes	yes	2	1.7983e-09	192.38	2150200	264800	178440	315070	158420	341760	339670	238340	189300	124410
NEDETTQTALQ	Q2FW33	50S ribosomal protein L17	rplQ SAOUHSC_02484	3920861	11	3.4246	1248.55	Q2FW33	yes	yes	2	4.0783e-49	158.01	404360	50322	36218	0	0	59211	80524	99611	40799	37672
NEDETTQTALQK	Q2FW33	50S ribosomal protein L17	rplQ SAOUHSC_02484	3920861	12	3.9274	1376.64	Q2FW33	yes	yes	2	2.4196e-100	303.31	17663000	1392500	1837500	5078800	732080	2291700	1631000	3022100	1245500	432250
NEDETTQTALQKL	Q2FW33	50S ribosomal protein L17	rplQ SAOUHSC_02484	3920861	13	3.9274	1489.73	Q2FW33	yes	yes	2	1.9711e-34	225.86	1055800	320010	48572	312300	30591	199000	62535	59139	23616	0
SERIETTE	Q2FW33	50S ribosomal protein L17	rplQ SAOUHSC_02484	3920861	8	3.9798	963.451	Q2FW33	yes	yes	2	0.023738	141.2	18577000	0	0	1471200	2851500	4112400	7568300	1225600	499570	848220
VEILNEDETTQTA	Q2FW33	50S ribosomal protein L17	rplQ SAOUHSC_02484	3920861	13	3.3316	1461.68	Q2FW33	yes	yes	2	8.7886e-05	131.32	130210	5503.8	0	0	34048	52035	38628	0	0	0
VEILNEDETTQTALQK	Q2FW33	50S ribosomal protein L17	rplQ SAOUHSC_02484	3920861	16	3.7781	1830.92	Q2FW33	yes	yes	2,3	9.2519e-119	288.42	2154700	340690	23811	73852	100940	1485900	112890	16661	0	0
AQMASETASKS	Q2FW31	30S ribosomal protein S11	rpsK SAOUHSC_02486	31635125	11	5.8613	1109.5	Q2FW31	yes	yes	2	8.4806e-08	107.85	0	0	0	0	0	0	0	0	0	0
SAGALGFKGSK	Q2FW31	30S ribosomal protein S11	rpsK SAOUHSC_02486	31635125	11	10.8004	1021.56	Q2FW31	yes	yes	2	0.03642	91.313	347440	75383	0	0	68980	36788	114710	51579	0	0
SSAGALGFKGSK	Q2FW31	30S ribosomal protein S11	rpsK SAOUHSC_02486	31635125	12	10.8004	1108.59	Q2FW31	yes	yes	2	0.0017433	118.9	832320	0	14024	27968	73943	411790	181770	122830	0	0
TVKGPGPGRE	Q2FW31	30S ribosomal protein S11	rpsK SAOUHSC_02486	31635125	10	9.1456	996.535	Q2FW31	yes	yes	2	0.03544	96.89	4141600	165340	640350	989590	0	779480	531450	370320	589110	76004
TVKGPGPGRESA	Q2FW31	30S ribosomal protein S11	rpsK SAOUHSC_02486	31635125	12	9.1456	1154.6	Q2FW31	yes	yes	3	0.0045889	92.866	0	0	0	0	0	0	0	0	0	0
VTVKGPGPGRE	Q2FW31	30S ribosomal protein S11	rpsK SAOUHSC_02486	31635125	11	9.1456	1095.6	Q2FW31	yes	yes	2	9.1296e-05	152.54	5784400	126950	108520	506530	1735800	1554500	1326900	226150	98104	100910
VTVKGPGPGRESA	Q2FW31	30S ribosomal protein S11	rpsK SAOUHSC_02486	31635125	13	9.1456	1253.67	Q2FW31	yes	yes	3	0.028304	89.301	1610700	123940	0	0	598500	491320	203520	122600	70797	0
MNIILMGLPGA	Q2FW27	Adenylate kinase (AK) (EC 2.7.4.3) (ATP-AMP transphosphorylase) (ATP:AMP phosphotransferase) (Adenylate monophosphate kinase)	adk SAOUHSC_02490	3920867	11	5.55	1128.6	Q2FW27	yes	yes	3	0.01018	18.745	0	0	0	0	0	0	0	0	0	0
SGSVFMKPAAPGTGVIA	Q2FW23	30S ribosomal protein S5	rpsE SAOUHSC_02494	3920871	17	9.15	1588.83	Q2FW23	yes	yes	2	0.0023699	99.055	146630	113180	0	33455	0	0	0	0	0	0
SGSVFMKPAAPGTGVIAG	Q2FW23	30S ribosomal protein S5	rpsE SAOUHSC_02494	3920871	18	9.15	1645.85	Q2FW23	yes	yes	2	0.013131	94.203	113620	113620	0	0	0	0	0	0	0	0
AQIIDDNKGVTLAQ	Q2FW22	50S ribosomal protein L18	rplR SAOUHSC_02495	3920872	14	4.109	1484.78	Q2FW22	yes	yes	2	1.2179e-13	154.72	561390	52049	38574	50228	0	348660	11955	37848	0	22079
ASSKDSDIATTATK	Q2FW22	50S ribosomal protein L18	rplR SAOUHSC_02495	3920872	14	5.9023	1394.69	Q2FW22	yes	yes	2,3	1.1077e-26	186.77	12304000	568320	134490	263200	1884600	3670500	3062300	868290	811340	1040400
DDNKGVTLAQ	Q2FW22	50S ribosomal protein L18	rplR SAOUHSC_02495	3920872	10	4.109	1059.52	Q2FW22	yes	yes	2	9.7357e-55	161.67	1745600	195870	0	0	315300	216590	0	333460	419320	265080
DIATTATKV	Q2FW22	50S ribosomal protein L18	rplR SAOUHSC_02495	3920872	9	5.7899	918.502	Q2FW22	yes	yes	2	0.014858	123.86	214500	200060	14439	0	0	0	0	0	0	0
EAARESGLEF	Q2FW22	50S ribosomal protein L18	rplR SAOUHSC_02495	3920872	10	3.9798	1107.52	Q2FW22	yes	yes	2	4.0552e-05	157.96	14704000	7801800	847310	4106400	494990	322440	216450	577510	175380	161450
IDDNKGVTLAQ	Q2FW22	50S ribosomal protein L18	rplR SAOUHSC_02495	3920872	11	4.109	1172.6	Q2FW22	yes	yes	2	4.3889e-06	160.67	5799700	345720	111040	200500	949000	1204200	1059700	825950	539630	563940
IIDDNKGVTLA	Q2FW22	50S ribosomal protein L18	rplR SAOUHSC_02495	3920872	11	4.109	1157.63	Q2FW22	yes	yes	2	0.0055428	117.09	16053000	12648000	701280	2698300	0	0	0	0	5004.6	0
IIDDNKGVTLAQ	Q2FW22	50S ribosomal protein L18	rplR SAOUHSC_02495	3920872	12	4.109	1285.69	Q2FW22	yes	yes	2	5.9416e-12	181.98	2273400	1554300	161040	0	0	0	289420	9184.8	259540	0
IIDDNKGVTLAQA	Q2FW22	50S ribosomal protein L18	rplR SAOUHSC_02495	3920872	13	4.109	1356.72	Q2FW22	yes	yes	2	1.1802e-20	187.11	1117800	938640	43357	135830	0	0	0	0	0	0
IIDDNKGVTLAQASSKDS	Q2FW22	50S ribosomal protein L18	rplR SAOUHSC_02495	3920872	18	4.3116	1860.94	Q2FW22	yes	yes	2,3	5.4812e-28	176.11	784330	784330	0	0	0	0	0	0	0	0
LAEAARESGLEF	Q2FW22	50S ribosomal protein L18	rplR SAOUHSC_02495	3920872	12	3.9798	1291.64	Q2FW22	yes	yes	2	0.034604	89.301	327700	200350	12239	29901	18786	66431	0	0	0	0
QIIDDNKGVTLA	Q2FW22	50S ribosomal protein L18	rplR SAOUHSC_02495	3920872	12	4.109	1285.69	Q2FW22	yes	yes	2	0.012774	98.156	3631400	3447000	17586	101850	0	0	64996	0	0	0
QIIDDNKGVTLAQ	Q2FW22	50S ribosomal protein L18	rplR SAOUHSC_02495	3920872	13	4.109	1413.75	Q2FW22	yes	yes	2	8.7752e-10	157.56	1221100	433140	30544	100540	185180	177200	123150	68040	56219	47065
QIIDDNKGVTLAQA	Q2FW22	50S ribosomal protein L18	rplR SAOUHSC_02495	3920872	14	4.109	1484.78	Q2FW22	yes	yes	2	2.4239e-05	113.25	888090	390400	13079	262410	21420	0	138930	37260	24594	0
SSKDSDIATTATK	Q2FW22	50S ribosomal protein L18	rplR SAOUHSC_02495	3920872	13	5.9023	1323.65	Q2FW22	yes	yes	2,3	2.2613e-10	108.71	870010	0	0	0	0	0	340490	0	252210	277310
TLAQASSKDS	Q2FW22	50S ribosomal protein L18	rplR SAOUHSC_02495	3920872	10	5.7899	1006.49	Q2FW22	yes	yes	2	0.019823	110.39	254050	0	0	254050	0	0	0	0	0	0
GQNDERVITG	Q2FW20	30S ribosomal protein S8	rpsH SAOUHSC_02498	3920874	10	4.184	1087.53	Q2FW20	yes	yes	2	0.024617	72.2	0	0	0	0	0	0	0	0	0	0
MTMTDPIADMLT	Q2FW20	30S ribosomal protein S8	rpsH SAOUHSC_02498	3920874	12	3.4918	1338.59	Q2FW20	yes	yes	3	0.010009	30.55	0	0	0	0	0	0	0	0	0	0
VEYVEDDKQ	Q2FW20	30S ribosomal protein S8	rpsH SAOUHSC_02498	3920874	9	3.7378	1123.5	Q2FW20	yes	yes	2	0.015154	123.63	371970	23807	0	0	90450	202060	0	0	0	55659
VSTSEGVITDKE	Q2FW20	30S ribosomal protein S8	rpsH SAOUHSC_02498	3920874	12	3.9274	1263.62	Q2FW20	yes	yes	2	0.017812	95.273	123520	0	0	0	0	70297	53219	0	0	0
DPKTNEPTRVG	Q2FW17	50S ribosomal protein L24	rplX SAOUHSC_02501	3920877	11	5.9482	1212.61	Q2FW17	yes	yes	2	0.011515	107.03	1144300	562350	121560	460380	0	0	0	0	0	0
IQETRPLSATK	Q2FW15	30S ribosomal protein S17	rpsQ SAOUHSC_02503	3920879	11	9.1456	1242.69	Q2FW15	yes	yes	2	1.2028e-07	169.65	647980	0	0	0	280940	205900	78001	0	83140	0
QETRPLSATK	Q2FW15	30S ribosomal protein S17	rpsQ SAOUHSC_02503	3920879	10	9.1456	1129.61	Q2FW15	yes	yes	2	0.017942	112.13	371080	33540	52807	173460	53156	0	0	58111	0	0
GADIARAEQYS	Q2FW12	30S ribosomal protein S3	rpsC SAOUHSC_02506	3920882	11	4.184	1179.55	Q2FW12	yes	yes	2	2.3534e-05	154.15	1954600	1102300	87114	765190	0	0	0	0	0	0
GQKINPIGL	Q2FW12	30S ribosomal protein S3	rpsC SAOUHSC_02506	3920882	9	9.15	938.555	Q2FW12	yes	yes	2	0.034897	109.21	158450	57129	12599	71047	0	0	0	17673	0	0
MEAKAVAR	Q2FW11	50S ribosomal protein L22	rplV SAOUHSC_02507	29734430	8	9.1456	874.469	Q2FW11	yes	yes	2	0.012542	157.68	11588000	0	0	1435100	0	0	0	6558100	3460400	134210
VSDGKEEAKEA	Q2FW11	50S ribosomal protein L22	rplV SAOUHSC_02507	29734430	11	4.1473	1161.55	Q2FW11	yes	yes	2	0.0006084	140.24	263530	0	0	263530	0	0	0	0	0	0
KVEAQEGSEKK	Q2FW10	30S ribosomal protein S19	rpsS SAOUHSC_02508	3920884	11	6.0656	1231.64	Q2FW10	yes	yes	3	0.023713	96.229	97224	0	0	97224	0	0	0	0	0	0
KVEAQEGSEKKQV	Q2FW10	30S ribosomal protein S19	rpsS SAOUHSC_02508	3920884	13	6.0656	1458.77	Q2FW10	yes	yes	3	3.2661e-05	136.96	293500	219630	73868	0	0	0	0	0	0	0
ANYDVLKLD	Q2FW07	50S ribosomal protein L4	rplD SAOUHSC_02511	3920887	9	4.109	1049.54	Q2FW07	yes	yes	2	0.0030526	143.5	2042300	519020	211790	386780	152040	385920	89250	165660	73545	58331
DGTKSGSIELSDA	Q2FW07	50S ribosomal protein L4	rplD SAOUHSC_02511	3920887	13	3.8759	1278.59	Q2FW07	yes	yes	2	7.0714e-15	179.19	287320	150260	19035	118020	0	0	0	0	0	0
EAAAKKVEEVLG	Q2FW07	50S ribosomal protein L4	rplD SAOUHSC_02511	3920887	12	4.4788	1242.68	Q2FW07	yes	yes	2	0.008813	103.08	238150	238150	0	0	0	0	0	0	0	0
FEAINLQRA	Q2FW07	50S ribosomal protein L4	rplD SAOUHSC_02511	3920887	9	5.8614	1060.57	Q2FW07	yes	yes	2	0.020035	119.75	212890	197580	0	15309	0	0	0	0	0	0
IEPNNSVLFE	Q2FW07	50S ribosomal protein L4	rplD SAOUHSC_02511	3920887	10	3.6135	1160.57	Q2FW07	yes	yes	2	0.044432	92.538	1098600	675510	80448	324260	0	0	0	18392	0	0
MASDASRVFK	Q2FW06	50S ribosomal protein L3	rplC SAOUHSC_02512	3920888	10	9.1455	1110.55	Q2FW06	yes	yes	2	5.8227e-06	167.67	931200	480090	43152	407960	0	0	0	0	0	0
KMSIFNNQKVSDHHA	Q2FW03	DNA topoisomerase 3 (EC 5.6.2.2) (DNA topoisomerase III)	topB SAOUHSC_02517	3920891	15	9.0375	1754.85	Q2FW03	yes	yes	2	0.0418	82.85	37340	0	0	0	0	0	37340	0	0	0
DQNKAAENGISASQL	Q2FVZ5	Uncharacterized protein	SAOUHSC_02525	3921116	15	4.184	1544.74	Q2FVZ5	yes	yes	2	3.7011e-27	187.16	310780	45267	82275	117330	28016	0	0	0	37883	0
TTPSKLTQEQGDYATTV	Q2FVZ5	Uncharacterized protein	SAOUHSC_02525	3921116	17	4.184	1838.89	Q2FVZ5	yes	yes	2	2.6967e-06	117.2	399010	112630	56334	165420	0	49479	0	0	15142	0
AAASLTDVTK	Q2FVX4	Molybdenum ABC transporter, periplasmic molybdate-binding protein	SAOUHSC_02549	3921137	10	5.7899	975.524	Q2FVX4	yes	yes	2	8.1647e-20	222.3	463650	60462	27267	21336	354580	0	0	0	0	0
AAASLTDVTKK	Q2FVX4	Molybdenum ABC transporter, periplasmic molybdate-binding protein	SAOUHSC_02549	3921137	11	8.9961	1103.62	Q2FVX4	yes	yes	2	0.0005726	141.1	2949000	573670	2024200	351100	0	0	0	0	0	0
AAASLTDVTKKL	Q2FVX4	Molybdenum ABC transporter, periplasmic molybdate-binding protein	SAOUHSC_02549	3921137	12	8.9961	1216.7	Q2FVX4	yes	yes	2	0.00064872	133.05	957640	282900	336700	229750	0	108290	0	0	0	0
ADNGKKQEIQVA	Q2FVX4	Molybdenum ABC transporter, periplasmic molybdate-binding protein	SAOUHSC_02549	3921137	12	5.9481	1299.68	Q2FVX4	yes	yes	2	0.025297	92.611	12701000	1553300	2048000	8690400	67684	0	341160	0	0	0
ADNGKKQEIQVAA	Q2FVX4	Molybdenum ABC transporter, periplasmic molybdate-binding protein	SAOUHSC_02549	3921137	13	5.9481	1370.72	Q2FVX4	yes	yes	2	0.016327	93.623	2030000	1123400	444060	462540	0	0	0	0	0	0
AGATSDSKLA	Q2FVX4	Molybdenum ABC transporter, periplasmic molybdate-binding protein	SAOUHSC_02549	3921137	10	5.7899	919.461	Q2FVX4	yes	yes	2	0.0020814	142.83	859490	0	0	859490	0	0	0	0	0	0
AGATSDSKLAKE	Q2FVX4	Molybdenum ABC transporter, periplasmic molybdate-binding protein	SAOUHSC_02549	3921137	12	5.9481	1176.6	Q2FVX4	yes	yes	2	0.00024182	138.45	661070	116690	264680	279710	0	0	0	0	0	0
ALGEVKTVPA	Q2FVX4	Molybdenum ABC transporter, periplasmic molybdate-binding protein	SAOUHSC_02549	3921137	10	5.8613	983.565	Q2FVX4	yes	yes	2	0.0061531	123.63	1447800	180190	271670	952670	0	0	20920	0	22306	0
ANTKDVDALKDKN	Q2FVX4	Molybdenum ABC transporter, periplasmic molybdate-binding protein	SAOUHSC_02549	3921137	13	5.9765	1430.74	Q2FVX4	yes	yes	3	7.0953e-05	133.05	617250	263900	137830	215520	0	0	0	0	0	0
DIKFNYGGS	Q2FVX4	Molybdenum ABC transporter, periplasmic molybdate-binding protein	SAOUHSC_02549	3921137	9	5.7894	999.466	Q2FVX4	yes	yes	2	0.0079853	133.13	213680	177400	0	36283	0	0	0	0	0	0
DIKFNYGGSG	Q2FVX4	Molybdenum ABC transporter, periplasmic molybdate-binding protein	SAOUHSC_02549	3921137	10	5.7894	1056.49	Q2FVX4	yes	yes	2	5.0706e-05	155.11	293520	77859	40731	174930	0	0	0	0	0	0
DNGKKQEIQV	Q2FVX4	Molybdenum ABC transporter, periplasmic molybdate-binding protein	SAOUHSC_02549	3921137	10	5.9481	1157.6	Q2FVX4	yes	yes	2	0.0036809	129.85	2001700	0	742770	1228400	0	0	24037	0	0	6484.9
DNGKKQEIQVA	Q2FVX4	Molybdenum ABC transporter, periplasmic molybdate-binding protein	SAOUHSC_02549	3921137	11	5.9481	1228.64	Q2FVX4	yes	yes	2	0.0035258	124.67	170640000	41133000	57076000	55712000	5747500	5903000	3404200	0	477730	1187200
DNNNLFKEV	Q2FVX4	Molybdenum ABC transporter, periplasmic molybdate-binding protein	SAOUHSC_02549	3921137	9	4.184	1091.52	Q2FVX4	yes	yes	2	0.00087738	160.53	770970	391020	372420	7530.4	0	0	0	0	0	0
EIQVAAAA	Q2FVX4	Molybdenum ABC transporter, periplasmic molybdate-binding protein	SAOUHSC_02549	3921137	8	3.8497	771.413	Q2FVX4	yes	yes	2	0.0020528	182.13	646140	222520	83523	158160	57656	54252	23917	0	15429	30689
FMSANTKDVDA	Q2FVX4	Molybdenum ABC transporter, periplasmic molybdate-binding protein	SAOUHSC_02549	3921137	11	4.109	1197.53	Q2FVX4	yes	yes	2	0.040263	89.827	38991	0	38991	0	0	0	0	0	0	0
GATSDSKLAKE	Q2FVX4	Molybdenum ABC transporter, periplasmic molybdate-binding protein	SAOUHSC_02549	3921137	11	5.9481	1105.56	Q2FVX4	yes	yes	2	7.9173e-08	174.4	609740	217970	206220	185550	0	0	0	0	0	0
GDKDSNYTSV	Q2FVX4	Molybdenum ABC transporter, periplasmic molybdate-binding protein	SAOUHSC_02549	3921137	10	4.109	1084.47	Q2FVX4	yes	yes	2	0.0033107	133.23	1749900	229640	895100	557440	0	22864	30197	0	14634	0
GDKDSNYTSVKDL	Q2FVX4	Molybdenum ABC transporter, periplasmic molybdate-binding protein	SAOUHSC_02549	3921137	13	4.3116	1440.67	Q2FVX4	yes	yes	2,3	7.8426e-34	222.74	5402900	513450	1093500	3796000	0	0	0	0	0	0
KDVKQVLN	Q2FVX4	Molybdenum ABC transporter, periplasmic molybdate-binding protein	SAOUHSC_02549	3921137	8	8.9961	942.55	Q2FVX4	yes	yes	2	0.018658	146.81	1109600	156890	465000	360860	0	0	0	126880	0	0
LGEVKTVPA	Q2FVX4	Molybdenum ABC transporter, periplasmic molybdate-binding protein	SAOUHSC_02549	3921137	9	5.8613	912.528	Q2FVX4	yes	yes	2	0.0079853	133.13	22940000	3347000	6051100	8365600	3263000	489970	585120	33604	614380	190360
LGEVKTVPAG	Q2FVX4	Molybdenum ABC transporter, periplasmic molybdate-binding protein	SAOUHSC_02549	3921137	10	5.8613	969.549	Q2FVX4	yes	yes	2	0.0083303	121.5	6941600	2229500	1210000	3457900	0	44160	0	0	0	0
LGEVKTVPAGKY	Q2FVX4	Molybdenum ABC transporter, periplasmic molybdate-binding protein	SAOUHSC_02549	3921137	12	8.7213	1260.71	Q2FVX4	yes	yes	2,3	0.0055308	107.17	1490200	769940	426140	294080	0	0	0	0	0	0
LGEVKTVPAGKYA	Q2FVX4	Molybdenum ABC transporter, periplasmic molybdate-binding protein	SAOUHSC_02549	3921137	13	8.7213	1331.74	Q2FVX4	yes	yes	2,3	1.008e-09	155.86	6864600	309890	970140	5527500	0	22171	0	0	19919	15000
LGEVKTVPAGKYAKQ	Q2FVX4	Molybdenum ABC transporter, periplasmic molybdate-binding protein	SAOUHSC_02549	3921137	15	10.1022	1587.9	Q2FVX4	yes	yes	3	0.00035952	109.44	265340	167750	39695	0	39711	18188	0	0	0	0
LIGDKDSNY	Q2FVX4	Molybdenum ABC transporter, periplasmic molybdate-binding protein	SAOUHSC_02549	3921137	9	4.109	1023.49	Q2FVX4	yes	yes	2	0.023099	117.31	382010	241680	32294	108040	0	0	0	0	0	0
LIGDKDSNYT	Q2FVX4	Molybdenum ABC transporter, periplasmic molybdate-binding protein	SAOUHSC_02549	3921137	10	4.109	1124.54	Q2FVX4	yes	yes	2	0.010198	119.68	6474600	1458900	1228300	3787300	0	0	0	0	0	0
LIGDKDSNYTS	Q2FVX4	Molybdenum ABC transporter, periplasmic molybdate-binding protein	SAOUHSC_02549	3921137	11	4.109	1211.57	Q2FVX4	yes	yes	2	0.044111	88.338	731840	129930	185260	393870	0	0	11765	0	11013	0
LNYVEKGNAKQ	Q2FVX4	Molybdenum ABC transporter, periplasmic molybdate-binding protein	SAOUHSC_02549	3921137	11	8.7213	1262.66	Q2FVX4	yes	yes	2,3	3.5775e-06	162.26	4102500	907070	1066100	2129300	0	0	0	0	0	0
LVLIGDKDSNYT	Q2FVX4	Molybdenum ABC transporter, periplasmic molybdate-binding protein	SAOUHSC_02549	3921137	12	4.109	1336.69	Q2FVX4	yes	yes	2	0.0020087	115.57	152360	93030	0	59333	0	0	0	0	0	0
NYVEKGNAKQ	Q2FVX4	Molybdenum ABC transporter, periplasmic molybdate-binding protein	SAOUHSC_02549	3921137	10	8.7213	1149.58	Q2FVX4	yes	yes	2	0.0088569	120.99	203250	0	0	203250	0	0	0	0	0	0
NYVEKGNAKQG	Q2FVX4	Molybdenum ABC transporter, periplasmic molybdate-binding protein	SAOUHSC_02549	3921137	11	8.7213	1206.6	Q2FVX4	yes	yes	2	1.0121e-07	171.85	333610	0	22730	310880	0	0	0	0	0	0
SANTKDVDAL	Q2FVX4	Molybdenum ABC transporter, periplasmic molybdate-binding protein	SAOUHSC_02549	3921137	10	4.109	1032.51	Q2FVX4	yes	yes	2	0.028913	102.53	342170	49929	117520	174720	0	0	0	0	0	0
SANTKDVDALK	Q2FVX4	Molybdenum ABC transporter, periplasmic molybdate-binding protein	SAOUHSC_02549	3921137	11	5.9023	1160.6	Q2FVX4	yes	yes	2	1.9354e-29	145.09	416150	0	0	416150	0	0	0	0	0	0
SGAPVDVFM	Q2FVX4	Molybdenum ABC transporter, periplasmic molybdate-binding protein	SAOUHSC_02549	3921137	9	3.7498	921.427	Q2FVX4	yes	yes	2	0.0037811	139.88	1981900	655390	466000	860540	0	0	0	0	0	0
SGAPVDVFMS	Q2FVX4	Molybdenum ABC transporter, periplasmic molybdate-binding protein	SAOUHSC_02549	3921137	10	3.7498	1008.46	Q2FVX4	yes	yes	2	0.0095105	120.99	604600	80223	172620	351760	0	0	0	0	0	0
SLTDVTKKLA	Q2FVX4	Molybdenum ABC transporter, periplasmic molybdate-binding protein	SAOUHSC_02549	3921137	10	8.9961	1074.63	Q2FVX4	yes	yes	2	0.024437	106.4	651030	489140	56011	105880	0	0	0	0	0	0
SLVLIGDKDS	Q2FVX4	Molybdenum ABC transporter, periplasmic molybdate-binding protein	SAOUHSC_02549	3921137	10	4.109	1045.57	Q2FVX4	yes	yes	2	0.0020814	142.83	139640	75915	25108	32590	6022.8	0	0	0	0	0
SLVLIGDKDSNYT	Q2FVX4	Molybdenum ABC transporter, periplasmic molybdate-binding protein	SAOUHSC_02549	3921137	13	4.109	1423.72	Q2FVX4	yes	yes	2	0.00033115	117.7	782310	734960	47354	0	0	0	0	0	0	0
VLIGDKDSNYT	Q2FVX4	Molybdenum ABC transporter, periplasmic molybdate-binding protein	SAOUHSC_02549	3921137	11	4.109	1223.6	Q2FVX4	yes	yes	2	0.0068635	112.13	349880	83758	107940	158180	0	0	0	0	0	0
VLNYVEKGNA	Q2FVX4	Molybdenum ABC transporter, periplasmic molybdate-binding protein	SAOUHSC_02549	3921137	10	5.8607	1105.58	Q2FVX4	yes	yes	2	0.012924	117.02	140740	131570	9169.4	0	0	0	0	0	0	0
VLNYVEKGNAKQ	Q2FVX4	Molybdenum ABC transporter, periplasmic molybdate-binding protein	SAOUHSC_02549	3921137	12	8.7213	1361.73	Q2FVX4	yes	yes	2,3	6.7077e-15	193.28	2623200	2222400	0	400780	0	0	0	0	0	0
VLNYVEKGNAKQG	Q2FVX4	Molybdenum ABC transporter, periplasmic molybdate-binding protein	SAOUHSC_02549	3921137	13	8.7213	1418.75	Q2FVX4	yes	yes	2,3	2.2809e-06	140.14	2285100	1560900	0	715070	9121.7	0	0	0	0	0
VYAKDVKQV	Q2FVX4	Molybdenum ABC transporter, periplasmic molybdate-binding protein	SAOUHSC_02549	3921137	9	8.7213	1048.59	Q2FVX4	yes	yes	2	0.0030164	143.7	1535600	349880	150880	1034800	0	0	0	0	0	0
YEAGATSDSKLA	Q2FVX4	Molybdenum ABC transporter, periplasmic molybdate-binding protein	SAOUHSC_02549	3921137	12	4.184	1211.57	Q2FVX4	yes	yes	2	3.557e-07	158.42	1204000	302230	584410	306050	11288	0	0	0	0	0
YVEKGNAKQGFV	Q2FVX4	Molybdenum ABC transporter, periplasmic molybdate-binding protein	SAOUHSC_02549	3921137	12	8.7213	1338.69	Q2FVX4	yes	yes	2,3	0.0013293	124.1	671690	0	0	671690	0	0	0	0	0	0
AVQGEKPQFVVN	Q2FVW4	Putative 2-hydroxyacid dehydrogenase SAOUHSC_02577 (EC 1.1.1.-)	SAOUHSC_02577	3921574	12	5.8613	1314.69	Q2FVW4	yes	yes	2	0.0033769	109.84	426370	196840	50414	170630	0	0	0	8489.5	0	0
EANNNEIAKAMTI	Q2FVW2	N-acetylmuramoyl-L-alanine amidase, putative	SAOUHSC_02580	3921576	13	4.2577	1417.69	Q2FVW2	yes	yes	2	0.0017269	108.72	137260	0	0	0	28917	97193	11151	0	0	0
GNAGYMTDTEPGSLA	Q2FVV9	Putative formate dehydrogenase SAOUHSC_02582 (EC 1.17.1.9)	SAOUHSC_02582	3921578	15	3.55	1482.63	Q2FVV9	yes	yes	2	0.011785	93.348	30426	30426	0	0	0	0	0	0	0	0
ANKIASPSSI	Q2FVV8	Transcriptional regulator, putative	SAOUHSC_02583	3921579	10	9.15	986.54	Q2FVV8	yes	yes	2	0.010667	119.22	285390	0	0	245080	0	0	22448	0	17856	0
EIVGRGTTEKI	Q2FVV8	Transcriptional regulator, putative	SAOUHSC_02583	3921579	11	5.9863	1201.67	Q2FVV8	yes	yes	2	0.0068028	112.36	95433	0	0	95433	0	0	0	0	0	0
LNDGDPFTIA	Q2FVV8	Transcriptional regulator, putative	SAOUHSC_02583	3921579	10	3.4918	1061.5	Q2FVV8	yes	yes	2	0.018054	80.688	0	0	0	0	0	0	0	0	0	0
VSNDTFTVDGV	Q2FVV8	Transcriptional regulator, putative	SAOUHSC_02583	3921579	11	3.4918	1152.53	Q2FVV8	yes	yes	2	3.1968e-10	189.58	1257300	489430	265080	389380	59903	25960	13088	8085.3	6377.8	0
YGGPNMAVKSL	Q2FVV8	Transcriptional regulator, putative	SAOUHSC_02583	3921579	11	8.7571	1135.57	Q2FVV8	yes	yes	2	7.2648e-08	175.15	354520	259860	17282	77373	0	0	0	0	0	0
NDNGFNALNKVNT	Q2FVR0	Putative hemin transport system permease protein HrtB	hrtB SAOUHSC_02641	3921418	13	5.7899	1419.67	Q2FVR0	yes	yes	2	0.00794	96.745	228510	45047	33120	78137	0	0	0	72206	0	0
SNKEQDVITMN	Q2FVR0	Putative hemin transport system permease protein HrtB	hrtB SAOUHSC_02641	3921418	11	4.184	1277.59	Q2FVR0	yes	yes	2	0.0065679	113.24	149470	0	22583	46230	0	0	0	80655	0	0
AANNEANKFG	Q2FVQ2	Uncharacterized lipoprotein SAOUHSC_02650	SAOUHSC_02650	3921212	10	5.8613	1034.48	Q2FVQ2	yes	yes	2	1.2374e-05	123.86	5885000	0	0	4882700	0	762380	239840	0	0	0
ALNAANNEANKFG	Q2FVQ2	Uncharacterized lipoprotein SAOUHSC_02650	SAOUHSC_02650	3921212	13	5.8613	1332.64	Q2FVQ2	yes	yes	2	3.596e-26	198.55	3306200	1065900	703970	1070600	0	0	0	269210	82362	114220
ALQQLPNFQT	Q2FVQ2	Uncharacterized lipoprotein SAOUHSC_02650	SAOUHSC_02650	3921212	10	5.55	1158.6	Q2FVQ2	yes	yes	2	4.1599e-05	157.66	1069500	781360	58715	140750	69222	0	19450	0	0	0
AMVTDPNYQQ	Q2FVQ2	Uncharacterized lipoprotein SAOUHSC_02650	SAOUHSC_02650	3921212	10	3.7498	1165.51	Q2FVQ2	yes	yes	2	4.8559e-15	212.21	2650900	311880	191380	712050	338980	176870	132910	376580	233010	177300
DYTGQAMVT	Q2FVQ2	Uncharacterized lipoprotein SAOUHSC_02650	SAOUHSC_02650	3921212	9	3.7498	984.422	Q2FVQ2	yes	yes	2	1.6459e-09	199.46	620830	110630	348810	150370	0	0	0	11024	0	0
DYTGQAMVTD	Q2FVQ2	Uncharacterized lipoprotein SAOUHSC_02650	SAOUHSC_02650	3921212	10	3.4918	1099.45	Q2FVQ2	yes	yes	2	9.5495e-07	170.47	1298300	234160	189360	313860	76308	89086	77644	122560	114590	80695
DYTGQAMVTDPN	Q2FVQ2	Uncharacterized lipoprotein SAOUHSC_02650	SAOUHSC_02650	3921212	12	3.4918	1310.54	Q2FVQ2	yes	yes	2	0.001532	121.56	353570	168690	67380	56151	13570	0	0	15760	20159	11852
DYTGQAMVTDPNYQQ	Q2FVQ2	Uncharacterized lipoprotein SAOUHSC_02650	SAOUHSC_02650	3921212	15	3.4918	1729.73	Q2FVQ2	yes	yes	2,3	9.5123e-107	296.85	500930000	82397000	73672000	111050000	43234000	62373000	28902000	46335000	33013000	19949000
FQTALNAANNEANK	Q2FVQ2	Uncharacterized lipoprotein SAOUHSC_02650	SAOUHSC_02650	3921212	14	5.8613	1504.73	Q2FVQ2	yes	yes	2	1.3845e-09	143.05	407030	41623	108330	21825	102380	0	0	0	45997	86876
GQAMVTDPNYQQ	Q2FVQ2	Uncharacterized lipoprotein SAOUHSC_02650	SAOUHSC_02650	3921212	12	3.7498	1350.59	Q2FVQ2	yes	yes	2	6.9608e-57	260.6	13205000	1989600	1979600	2589900	1960500	837180	539870	1470100	1093400	744770
LNAANNEANKFG	Q2FVQ2	Uncharacterized lipoprotein SAOUHSC_02650	SAOUHSC_02650	3921212	12	5.8613	1261.61	Q2FVQ2	yes	yes	2	6.0622e-15	193.73	6674000	2055900	1453500	1697600	0	51415	27295	307150	412130	668950
LQQLPNFQTA	Q2FVQ2	Uncharacterized lipoprotein SAOUHSC_02650	SAOUHSC_02650	3921212	10	5.55	1158.6	Q2FVQ2	yes	yes	2	4.1599e-05	157.66	1452400	294240	192600	388120	139710	199080	26939	45400	65459	100850
MVTDPNYQQ	Q2FVQ2	Uncharacterized lipoprotein SAOUHSC_02650	SAOUHSC_02650	3921212	9	3.7498	1094.47	Q2FVQ2	yes	yes	2	5.9279e-79	215.88	2509800	407020	602380	480430	159230	0	0	388040	131810	340860
NAANNEANKFG	Q2FVQ2	Uncharacterized lipoprotein SAOUHSC_02650	SAOUHSC_02650	3921212	11	5.8613	1148.52	Q2FVQ2	yes	yes	2	7.4682e-06	154.66	898080	510480	0	375750	11847	0	0	0	0	0
PNANGKYSIVTV	Q2FVQ2	Uncharacterized lipoprotein SAOUHSC_02650	SAOUHSC_02650	3921212	12	8.7571	1261.67	Q2FVQ2	yes	yes	2	0.0022984	111.94	195490	0	0	0	0	0	0	67453	92026	36011
QAMVTDPNYQQ	Q2FVQ2	Uncharacterized lipoprotein SAOUHSC_02650	SAOUHSC_02650	3921212	11	3.7498	1293.57	Q2FVQ2	yes	yes	2	0.00017885	150.46	740960	136030	233660	144210	43531	22601	24551	95488	16193	24704
QLPNFQTALN	Q2FVQ2	Uncharacterized lipoprotein SAOUHSC_02650	SAOUHSC_02650	3921212	10	5.55	1144.59	Q2FVQ2	yes	yes	2	0.0341	98.048	728840	465470	59935	95538	36726	46796	17555	6824.1	0	0
QNAAPVARQ	Q2FVQ2	Uncharacterized lipoprotein SAOUHSC_02650	SAOUHSC_02650	3921212	9	10	953.504	Q2FVQ2	yes	yes	2	0.0037811	139.88	6768800	0	0	6768800	0	0	0	0	0	0
QNAAPVARQIYP	Q2FVQ2	Uncharacterized lipoprotein SAOUHSC_02650	SAOUHSC_02650	3921212	12	8.799	1326.7	Q2FVQ2	yes	yes	2	0.00043703	135.86	1031800	372530	438880	161580	40985	11699	0	0	0	6149.7
SYVAPYYGQNAAPV	Q2FVQ2	Uncharacterized lipoprotein SAOUHSC_02650	SAOUHSC_02650	3921212	14	5.5483	1498.71	Q2FVQ2	yes	yes	2	0.043795	80.312	35974	0	35974	0	0	0	0	0	0	0
SYVAPYYGQNAAPVARQ	Q2FVQ2	Uncharacterized lipoprotein SAOUHSC_02650	SAOUHSC_02650	3921212	17	8.5486	1853.91	Q2FVQ2	yes	yes	2	2.6616e-64	233.4	853970	545380	49465	107540	24849	126730	0	0	0	0
TGQAMVTDPNYQQ	Q2FVQ2	Uncharacterized lipoprotein SAOUHSC_02650	SAOUHSC_02650	3921212	13	3.7498	1451.64	Q2FVQ2	yes	yes	2	4.2062e-68	270.21	3798500	579950	591770	739210	668100	298190	152020	298080	295150	176020
TVDYTGQAMVTDPNYQQ	Q2FVQ2	Uncharacterized lipoprotein SAOUHSC_02650	SAOUHSC_02650	3921212	17	3.4918	1929.84	Q2FVQ2	yes	yes	2	1.6299e-34	185.02	983300	0	110650	180300	49077	538130	0	55661	17640	31843
VAPYYGQNAAPVARQ	Q2FVQ2	Uncharacterized lipoprotein SAOUHSC_02650	SAOUHSC_02650	3921212	15	8.6413	1603.81	Q2FVQ2	yes	yes	2	2.4362e-27	190.85	2250200	306340	515930	209070	952230	134120	60549	0	31789	40219
VDYTGQAMVTDPNYQQ	Q2FVQ2	Uncharacterized lipoprotein SAOUHSC_02650	SAOUHSC_02650	3921212	16	3.4918	1828.79	Q2FVQ2	yes	yes	2	9.9997e-45	211.7	1130400	370820	254140	243160	78075	101770	13653	41354	11532	15925
YTGQAMVTDPNYQQ	Q2FVQ2	Uncharacterized lipoprotein SAOUHSC_02650	SAOUHSC_02650	3921212	14	3.7498	1614.7	Q2FVQ2	yes	yes	2	9.9406e-91	274.45	7318900	1772100	1392800	1064100	477000	759400	393220	874460	301220	284660
YVAPYYGQNAAPVARQ	Q2FVQ2	Uncharacterized lipoprotein SAOUHSC_02650	SAOUHSC_02650	3921212	16	8.5486	1766.87	Q2FVQ2	yes	yes	2	1.7545e-63	227.06	905790	745410	30389	98790	0	31207	0	0	0	0
TFKDEPGVTYV	Q2FVN4	Uncharacterized protein	SAOUHSC_02668	3921230	11	4.184	1254.61	Q2FVN4	yes	yes	2	0.011953	106.62	222910	63032	20872	114060	0	19737	0	0	5212	0
ETTSSTSIPIS	Q2FVN2	Uncharacterized protein	SAOUHSC_02670	3921232	11	3.8497	1121.55	Q2FVN2	yes	yes	2	0.0043073	121.73	383480	0	0	0	0	0	0	179580	137240	66658
VKIQNQKQEQLA	Q2FVL6	Uncharacterized protein	SAOUHSC_02695	3919714	12	8.9962	1425.79	Q2FVL6	yes	yes	2	0.0074135	104.82	485060	129130	260030	54648	0	0	0	0	28411	12836
GLDAGRFD	Q2FVL2	Uncharacterized protein	SAOUHSC_02699	3919718	8	4.109	849.398	Q2FVL2	yes	yes	2	5.232e-11	138.1	0	0	0	0	0	0	0	0	0	0
SKDSKTINV	Q2FVL2	Uncharacterized protein	SAOUHSC_02699	3919718	9	8.9961	990.535	Q2FVL2	yes	yes	2	0.0023524	147.4	2028400	256270	907590	836460	0	0	0	28069	0	0
YNIGGNFQ	Q2FVK3	Gamma-hemolysin h-gamma-ii subunit, putative	SAOUHSC_02708	3919727	8	5.5494	911.414	Q2FVK3;Q2FVK2;Q2FXB0	yes	yes	2	0.012449	157.34	2010100	0	674310	1173300	0	0	0	134530	13804	14141
ENKIEDIG	Q2FVK3	Gamma-hemolysin h-gamma-ii subunit, putative	SAOUHSC_02708	3919727	8	3.9274	916.45	Q2FVK3	yes	no	2	0.018182	147.34	422700	119610	107910	177920	0	0	0	17267	0	0
ENQDGQINQQV	Q2FVI6	Uncharacterized protein	SAOUHSC_02724	3921600	11	3.55	1271.57	Q2FVI6	yes	yes	2	0.018466	100.55	111770	29971	25113	56691	0	0	0	0	0	0
QINKLTEANN	Q2FVI6	Uncharacterized protein	SAOUHSC_02724	3921600	10	5.8613	1143.59	Q2FVI6	yes	yes	2	0.0033107	133.23	1941000	401310	149070	820960	217410	0	48728	78832	172820	51857
SLFKDDNGGAN	Q2FVI6	Uncharacterized protein	SAOUHSC_02724	3921600	11	4.109	1136.51	Q2FVI6	yes	yes	2	5.277e-07	168.22	415530	138340	51351	101660	82386	0	19652	0	13634	8509.7
VENQDGQINQ	Q2FVI6	Uncharacterized protein	SAOUHSC_02724	3921600	10	3.55	1143.52	Q2FVI6	yes	yes	2	0.003795	128.81	559430	287150	62897	0	104620	0	28929	23603	0	52231
GQISNTEELNQHE	Q2FVG0	ABC transporter, ATP-binding protein, putative	SAOUHSC_02754	3921626	13	3.9785	1497.67	Q2FVG0	yes	yes	2	2.8198e-94	286.09	4012200	290850	501380	0	983840	1548200	687950	0	0	0
DVSGKHVLT	Q2FVF5	Uncharacterized protein	SAOUHSC_02759	3921631	9	7.0012	954.513	Q2FVF5	yes	yes	2	0.0036557	140.14	7503900	1913900	1531100	1097000	434380	0	0	216970	832420	1478200
STINTIKYD	Q2FVF5	Uncharacterized protein	SAOUHSC_02759	3921631	9	5.7894	1053.53	Q2FVF5	yes	yes	2	0.011018	128.27	372420	220090	48661	88720	14947	0	0	0	0	0
MYHAMAHKFGDNWKKAQ	Q2FVC7	Uncharacterized protein	SAOUHSC_02786		17	10.1025	2061.97	Q2FVC7	yes	yes	2	0.038	51.771	517510	30587	446200	0	0	25371	0	0	0	15349
QPLIVSDDKAIEK	Q2FVB9	Uncharacterized protein	SAOUHSC_02815	3921254	13	4.3699	1454.8	Q2FVB9	yes	yes	2,3	1.071e-05	129.37	3317100	1381300	407060	576590	0	585570	185500	0	103040	78119
SNLEIKQGEN	Q2FVA6	Uncharacterized protein	SAOUHSC_02827	3921266	10	4.2577	1130.56	Q2FVA6	yes	yes	2	0.0032376	133.89	1361500	96810	236260	329130	59940	80307	155890	213650	102600	86955
SNLEIKQGENK	Q2FVA6	Uncharacterized protein	SAOUHSC_02827	3921266	11	5.9861	1258.65	Q2FVA6	yes	yes	2,3	0.0067652	112.5	1213900	107170	70985	161080	0	0	337300	293780	161270	82309
VDNNEINIDH	Q2FVA6	Uncharacterized protein	SAOUHSC_02827	3921266	10	3.8748	1181.53	Q2FVA6	yes	yes	2	1.9501e-19	215.89	1264500	131420	118360	208160	97867	75361	97917	167100	246910	121450
VEDNELVVKGK	Q2FV74	ATP-dependent Clp protease ATP-binding subunit ClpL	clpL SAOUHSC_02862	3921534	11	4.4258	1228.67	Q2FV74	yes	yes	2,3	5.277e-07	168.22	6131600	470900	715860	988770	87183	507920	497630	0	1292000	1571300
MLNIKNGEMNKA	Q2FV71	Uncharacterized protein	SAOUHSC_02865	3921537	12	8.9962	1361.68	Q2FV71	yes	yes	2	0.034796	50.149	246680	0	0	246680	0	0	0	0	0	0
AIEDQGYDVV	Q2FV63	Copper chaperone CopZ	copZ SAOUHSC_02874	3921545	10	3.38	1107.51	Q2FV63	yes	yes	2	0.0012878	147.4	1863100	267210	181650	307800	286430	261490	148820	172320	117420	119930
KDAIEDQGY	Q2FV63	Copper chaperone CopZ	copZ SAOUHSC_02874	3921545	9	3.8759	1037.47	Q2FV63	yes	yes	2	3.5617e-06	190.96	934460	50048	28724	70515	108460	78266	78953	77657	304970	136870
KDAIEDQGYDVV	Q2FV63	Copper chaperone CopZ	copZ SAOUHSC_02874	3921545	12	3.6989	1350.63	Q2FV63	yes	yes	2	0.0002579	138.24	1440200	246600	73686	177220	105930	486700	84603	68781	118390	78288
QYDDSKVAVS	Q2FV63	Copper chaperone CopZ	copZ SAOUHSC_02874	3921545	10	4.109	1110.52	Q2FV63	yes	yes	2	0.031872	99.973	779960	239140	0	80399	238570	122050	99804	0	0	0
QYDDSKVAVSQ	Q2FV63	Copper chaperone CopZ	copZ SAOUHSC_02874	3921545	11	4.109	1238.58	Q2FV63	yes	yes	2	0.00039678	145.28	316140	0	0	0	0	34414	42542	42628	132270	64293
YDDSKVAVSQ	Q2FV63	Copper chaperone CopZ	copZ SAOUHSC_02874	3921545	10	4.109	1110.52	Q2FV63	yes	yes	2	1.5729e-05	164.9	1242500	45655	84961	39402	109800	104240	102880	126710	397770	231050
MDTKDFKRLEKMY	Q2FV54	O-acetyltransferase OatA (EC 2.3.1.-)	oatA SAOUHSC_02885	3921554	13	8.69	1703.84	Q2FV54	yes	yes	2	0.041597	35.677	2773100	749110	1204900	561190	0	0	77188	73689	106990	0
AAVKAYKAQG	Q2FV52	Probable transglycosylase IsaA (EC 3.2.-.-) (Immunodominant staphylococcal antigen A)	isaA SAOUHSC_02887	3921556	10	10.2325	1005.56	Q2FV52	yes	yes	2	0.0034996	131.5	207840	0	177110	30729	0	0	0	0	0	0
AIIARESNG	Q2FV52	Probable transglycosylase IsaA (EC 3.2.-.-) (Immunodominant staphylococcal antigen A)	isaA SAOUHSC_02887	3921556	9	5.8614	929.493	Q2FV52	yes	yes	2	1.1602e-09	203.29	8623100	1301900	482100	1975400	1120700	1360100	2338000	45012	0	0
AIIARESNGQVN	Q2FV52	Probable transglycosylase IsaA (EC 3.2.-.-) (Immunodominant staphylococcal antigen A)	isaA SAOUHSC_02887	3921556	12	5.8614	1270.66	Q2FV52	yes	yes	2	0.030678	90.697	45920	45920	0	0	0	0	0	0	0	0
APTYHNYSTSTT	Q2FV52	Probable transglycosylase IsaA (EC 3.2.-.-) (Immunodominant staphylococcal antigen A)	isaA SAOUHSC_02887	3921556	12	6.9985	1341.58	Q2FV52	yes	yes	2	0.0003543	136.96	766180	240350	324330	201490	0	0	0	0	0	0
AYNPSGASGLFQ	Q2FV52	Probable transglycosylase IsaA (EC 3.2.-.-) (Immunodominant staphylococcal antigen A)	isaA SAOUHSC_02887	3921556	12	5.5494	1210.56	Q2FV52	yes	yes	2	0.00010394	142.08	295500	73488	176520	45488	0	0	0	0	0	0
IIARESNG	Q2FV52	Probable transglycosylase IsaA (EC 3.2.-.-) (Immunodominant staphylococcal antigen A)	isaA SAOUHSC_02887	3921556	8	5.8614	858.456	Q2FV52	yes	yes	2	0.042891	129.47	1269400	0	0	1269400	0	0	0	0	0	0
NGNTAGATGSSAAQIM	Q2FV52	Probable transglycosylase IsaA (EC 3.2.-.-) (Immunodominant staphylococcal antigen A)	isaA SAOUHSC_02887	3921556	16	5.55	1449.65	Q2FV52	yes	yes	2	1.7823e-14	147.56	651360	56052	433270	119600	0	0	0	42435	0	0
KDTQQQNQPEED	Q2FV29	Uncharacterized protein	SAOUHSC_02910	3921362	12	3.7378	1458.62	Q2FV29	yes	yes	2	0.041069	87.001	94957	0	0	94957	0	0	0	0	0	0
NKDTQQQNQPEEDERQ	Q2FV29	Uncharacterized protein	SAOUHSC_02910	3921362	16	3.9522	1985.87	Q2FV29	yes	yes	3	2.8673e-05	110.97	210680	37271	40781	132630	0	0	0	0	0	0
TDNKKTVATSDNKDTQQQNQPEEDE	Q2FV29	Uncharacterized protein	SAOUHSC_02910	3921362	25	3.9388	2862.28	Q2FV29	yes	yes	3	0.034706	80.412	366390	0	109050	257340	0	0	0	0	0	0
GQDYTAIQQ	Q2FV27	Uncharacterized protein	SAOUHSC_02912	3921364	9	3.7498	1022.47	Q2FV27	yes	yes	2	0.0032453	142.43	32162	0	0	0	0	0	0	32162	0	0
ALDQSGGSTPKA	Q2FV17	Fructose-bisphosphate aldolase class 1 (EC 4.1.2.13) (Fructose-bisphosphate aldolase class I) (FBP aldolase)	fda SAOUHSC_02926	3921377	12	5.7899	1130.56	Q2FV17	yes	yes	2	0.011262	100.04	929910	0	0	0	98624	90393	257480	60069	79435	343910
AVESIYDASVNKN	Q2FV17	Fructose-bisphosphate aldolase class 1 (EC 4.1.2.13) (Fructose-bisphosphate aldolase class I) (FBP aldolase)	fda SAOUHSC_02926	3921377	13	4.184	1408.68	Q2FV17	yes	yes	2	1.846e-111	309.68	39510000	5951600	6081200	9508100	3433000	3979900	3200000	3378600	2073500	1903600
DAVESIYDASVNKN	Q2FV17	Fructose-bisphosphate aldolase class 1 (EC 4.1.2.13) (Fructose-bisphosphate aldolase class I) (FBP aldolase)	fda SAOUHSC_02926	3921377	14	3.8759	1523.71	Q2FV17	yes	yes	2	3.4161e-10	151.7	439200	283530	20135	74837	0	52457	0	8241.8	0	0
IYDASVNKN	Q2FV17	Fructose-bisphosphate aldolase class 1 (EC 4.1.2.13) (Fructose-bisphosphate aldolase class I) (FBP aldolase)	fda SAOUHSC_02926	3921377	9	5.7894	1022.5	Q2FV17	yes	yes	2	0.00090161	159.79	1003300	59551	113720	0	242630	0	183320	167700	163960	72481
LDQSGGSTPKA	Q2FV17	Fructose-bisphosphate aldolase class 1 (EC 4.1.2.13) (Fructose-bisphosphate aldolase class I) (FBP aldolase)	fda SAOUHSC_02926	3921377	11	5.7899	1059.52	Q2FV17	yes	yes	2	4.6213e-06	160.22	1360800	24774	146800	0	0	0	0	63709	834700	290770
SIYDASVNKN	Q2FV17	Fructose-bisphosphate aldolase class 1 (EC 4.1.2.13) (Fructose-bisphosphate aldolase class I) (FBP aldolase)	fda SAOUHSC_02926	3921377	10	5.7894	1109.54	Q2FV17	yes	yes	2	2.0972e-19	215.06	1835400	225100	380470	263070	373380	222590	97179	116350	91030	66248
VDKGLAEEQN	Q2FV17	Fructose-bisphosphate aldolase class 1 (EC 4.1.2.13) (Fructose-bisphosphate aldolase class I) (FBP aldolase)	fda SAOUHSC_02926	3921377	10	3.9274	1101.53	Q2FV17	yes	yes	2	2.9325e-05	115.33	0	0	0	0	0	0	0	0	0	0
KLQNMVDNGVV	Q2FUZ9	Siroheme synthase, putative	SAOUHSC_02945	3921651	11	5.7899	1215.63	Q2FUZ9	yes	yes	2	0.02583	83.869	0	0	0	0	0	0	0	0	0	0
TENFILGRN	Q2FUY1	HTH-type transcriptional regulator ArcR	arcR SAOUHSC_02964	3921666	9	5.8614	1062.55	Q2FUY1	yes	yes	2	0.012547	125.82	233950	22703	39499	55707	35081	34822	21831	24305	0	0
AESIENPQVRS	Q2FUX7	Arginine deiminase (ADI) (EC 3.5.3.6) (Arginine dihydrolase) (AD)	arcA SAOUHSC_02969	3921670	11	4.2577	1228.6	Q2FUX7	yes	yes	2	0.0036709	124.12	325320	0	0	176270	38409	59468	51170	0	0	0
MTDGPIKVN	Q2FUX7	Arginine deiminase (ADI) (EC 3.5.3.6) (Arginine dihydrolase) (AD)	arcA SAOUHSC_02969	3921670	9	5.7899	973.49	Q2FUX7	yes	yes	2	4.9146e-07	196.99	4291900	271430	418570	1653500	506350	479370	519640	328380	69209	45479
MTDGPIKVNSEIG	Q2FUX7	Arginine deiminase (ADI) (EC 3.5.3.6) (Arginine dihydrolase) (AD)	arcA SAOUHSC_02969	3921670	13	4.184	1359.67	Q2FUX7	yes	yes	2	0.027944	89.43	298010	210800	13113	74098	0	0	0	0	0	0
TDGPIKVN	Q2FUX7	Arginine deiminase (ADI) (EC 3.5.3.6) (Arginine dihydrolase) (AD)	arcA SAOUHSC_02969	3921670	8	5.7899	842.45	Q2FUX7	yes	yes	2	1.6865e-45	203.93	22400000	1250100	3308000	4085400	2455600	3019000	3161500	2370500	1292900	1456700
TDGPIKVNS	Q2FUX7	Arginine deiminase (ADI) (EC 3.5.3.6) (Arginine dihydrolase) (AD)	arcA SAOUHSC_02969	3921670	9	5.7899	929.482	Q2FUX7	yes	yes	2	1.6459e-09	199.46	1346800	179390	173740	401770	104540	141440	179520	105040	0	61370
TDGPIKVNSEIG	Q2FUX7	Arginine deiminase (ADI) (EC 3.5.3.6) (Arginine dihydrolase) (AD)	arcA SAOUHSC_02969	3921670	12	4.184	1228.63	Q2FUX7	yes	yes	2	7.0041e-05	146.16	4819900	2175600	400960	1846000	128650	94198	46326	87158	21861	19145
LQSLDQRIA	Q2FUW9	Surface protein F	sasF SAOUHSC_02982	3921464	9	5.79	1042.58	Q2FUW9	yes	yes	2	0.0035309	140.83	784300	150990	343430	289880	0	0	0	0	0	0
MNYQVLLYYK	Q2FUS7	UPF0176 protein SAOUHSC_03024	SAOUHSC_03024	3921291	10	8.5338	1333.67	Q2FUS7	yes	yes	2	0.011073	37.344	0	0	0	0	0	0	0	0	0	0
QENGGDVFVH	Q2FUQ9	Cold shock protein, putative	SAOUHSC_03045	3921309	10	4.1808	1100.49	Q2FUQ9	yes	yes	2	0.042073	93.649	351670	0	0	0	49786	118180	63233	0	60912	59562
TEGQRGDQAVNVQTV	Q2FUQ9	Cold shock protein, putative	SAOUHSC_03045	3921309	15	4.184	1600.78	Q2FUQ9	yes	yes	2	2.4901e-08	137.46	2353600	72656	76986	411850	265560	545790	294500	384850	128720	172720
LSVLSELCLP	Q2FUQ4	Ribosomal RNA small subunit methyltransferase G (EC 2.1.1.-) (16S rRNA 7-methylguanosine methyltransferase) (16S rRNA m7G methyltransferase)	rsmG SAOUHSC_03051	3921314	10	3.8497	1129.61	Q2FUQ4	yes	yes	2	0.01098	85.67	0	0	0	0	0	0	0	0	0	0
MINKNDIVAD	P72360	Iron-sulfur cluster repair protein ScdA (Cell wall-related protein ScdA)	scdA SAOUHSC_00229	3920304	10	4.109	1131.56	P72360	yes	yes	2	4.5827e-05	156.48	1656700	180480	316870	519280	92755	164990	185490	152250	21797	22745
DFAEITKTTPEKS	P60430	50S ribosomal protein L2	rplB SAOUHSC_02509	3920885	13	4.4258	1465.73	P60430	yes	yes	2	1.6792e-06	143.94	219680	219680	0	0	0	0	0	0	0	0
LMHVNEGTEVE	P60070	Anti-sigma-B factor antagonist (Anti-anti-sigma-B factor)	rsbV SAOUHSC_02300	3919171	11	3.9785	1256.57	P60070	yes	yes	2	0.0097213	108.7	825950	170010	0	250590	0	257270	0	0	94597	53483
ANEILDAANNTGGAVK	P48940	30S ribosomal protein S7	rpsG SAOUHSC_00528	31634816	16	4.184	1556.78	P48940	yes	yes	2	2.5141e-103	280.5	1186800	85470	26022	131980	233240	430390	158370	64059	35850	21432
EILDAANNTGGAVK	P48940	30S ribosomal protein S7	rpsG SAOUHSC_00528	31634816	14	4.184	1371.7	P48940	yes	yes	2	1.977e-07	132.79	501700	0	0	134870	30349	160040	77627	57595	30470	10755
ILDAANNTGGAVK	P48940	30S ribosomal protein S7	rpsG SAOUHSC_00528	31634816	13	5.7899	1242.66	P48940	yes	yes	2	1.1425e-06	147.33	1986000	65070	65174	155280	630200	468820	172310	208100	115110	105950
LDAANNTGGAVK	P48940	30S ribosomal protein S7	rpsG SAOUHSC_00528	31634816	12	5.7899	1129.57	P48940	yes	yes	2	6.304e-246	215.72	2558400	117940	0	417560	932840	0	0	511660	578380	0
NEILDAANNTGG	P48940	30S ribosomal protein S7	rpsG SAOUHSC_00528	31634816	12	3.55	1187.54	P48940	yes	yes	2	0.028315	85.536	0	0	0	0	0	0	0	0	0	0
NEILDAANNTGGAVK	P48940	30S ribosomal protein S7	rpsG SAOUHSC_00528	31634816	15	4.184	1485.74	P48940	yes	yes	2	3.1099e-43	220.59	1709600	51949	70531	276910	369190	578600	168300	132730	43351	18022
ADEEDSYVVA	P47768	DNA-directed RNA polymerase subunit beta (RNAP subunit beta) (EC 2.7.7.6) (RNA polymerase subunit beta) (Transcriptase subunit beta)	rpoB SAOUHSC_00524	3920377	10	3.2949	1096.46	P47768	yes	yes	2	0.03207	99.802	270260	208960	0	61303	0	0	0	0	0	0
ADEEDSYVVAQ	P47768	DNA-directed RNA polymerase subunit beta (RNAP subunit beta) (EC 2.7.7.6) (RNA polymerase subunit beta) (Transcriptase subunit beta)	rpoB SAOUHSC_00524	3920377	11	3.2949	1224.51	P47768	yes	yes	2	0.0013895	135.86	123510	101430	7395.8	14689	0	0	0	0	0	0
APETQKEVTD	P47768	DNA-directed RNA polymerase subunit beta (RNAP subunit beta) (EC 2.7.7.6) (RNA polymerase subunit beta) (Transcriptase subunit beta)	rpoB SAOUHSC_00524	3920377	10	3.9274	1116.53	P47768	yes	yes	2	9.5749e-20	221.5	69074000	5890500	5593000	10105000	4440400	12996000	7121700	6862000	6217900	9847700
DAPETQKEVTD	P47768	DNA-directed RNA polymerase subunit beta (RNAP subunit beta) (EC 2.7.7.6) (RNA polymerase subunit beta) (Transcriptase subunit beta)	rpoB SAOUHSC_00524	3920377	11	3.7378	1231.56	P47768	yes	yes	2	0.00012287	151.79	3227900	744600	367480	0	468620	375420	307290	382580	347840	234090
DDVVERKVDLQQNDAPETQKEVTD	P47768	DNA-directed RNA polymerase subunit beta (RNAP subunit beta) (EC 2.7.7.6) (RNA polymerase subunit beta) (Transcriptase subunit beta)	rpoB SAOUHSC_00524	3920377	24	3.8346	2770.33	P47768	yes	yes	3,4	0.00010341	115.42	974980	0	0	0	0	974980	0	0	0	0
DVVERKVDLQQNDAPETQKEVTD	P47768	DNA-directed RNA polymerase subunit beta (RNAP subunit beta) (EC 2.7.7.6) (RNA polymerase subunit beta) (Transcriptase subunit beta)	rpoB SAOUHSC_00524	3920377	23	3.9388	2655.3	P47768	yes	yes	3	8.5718e-08	135.49	1116900	28082	0	0	0	1088800	0	0	0	0
LQQNDAPETQKEVTD	P47768	DNA-directed RNA polymerase subunit beta (RNAP subunit beta) (EC 2.7.7.6) (RNA polymerase subunit beta) (Transcriptase subunit beta)	rpoB SAOUHSC_00524	3920377	15	3.7378	1714.8	P47768	yes	yes	2	5.2325e-43	216.27	6115000	738880	423050	1622600	1085400	503430	524010	342200	563960	311520
SNANSEVFELH	P47768	DNA-directed RNA polymerase subunit beta (RNAP subunit beta) (EC 2.7.7.6) (RNA polymerase subunit beta) (Transcriptase subunit beta)	rpoB SAOUHSC_00524	3920377	11	4.2539	1245.56	P47768	yes	yes	2	0.0082394	110.08	77008	61581	0	15427	0	0	0	0	0	0
VGTIIKIIK	P0C818	Phenol-soluble modulin alpha 4 peptide	psmA4 SAOUHSC_00411.1		9	10.8004	983.674	P0C818	yes	yes	2	0.0079853	133.13	1120900	1120900	0	0	0	0	0	0	0	0
FIKGLIEK	P0C7Z3	Phenol-soluble modulin alpha 2 peptide	psmA2 SAOUHSC_00411.3		8	8.9962	946.585	P0C7Z3	yes	yes	2	0.012352	153.78	1228100	1228100	0	0	0	0	0	0	0	0
IKSLIEQF	P0C7Y1	Phenol-soluble modulin alpha 1 peptide	psmA1 SAOUHSC_00411.4		8	5.8613	976.559	P0C7Y1	yes	yes	2	0.0047691	179.51	1379900	1317900	0	61978	0	0	0	0	0	0
VIKSLIEQ	P0C7Y1	Phenol-soluble modulin alpha 1 peptide	psmA1 SAOUHSC_00411.4		8	5.8613	928.559	P0C7Y1	yes	yes	2	0.013979	162.88	1616400	1075600	231610	251640	57543	0	0	0	0	0
VVQDKMGLDK	P0C0V7	Phosphoglucosamine mutase (EC 5.4.2.10)	glmM femD SAOUHSC_02405	3919620	10	5.9023	1131.6	P0C0V7	yes	yes	2,3	5.3382e-10	125.74	1942600	222440	0	141630	154920	416110	386820	329370	205640	85681
AEAIDAKGGAHEVI	P0A0F8	50S ribosomal protein L15	rplO SAOUHSC_02492	3920869	14	4.421	1379.7	P0A0F8	yes	yes	3	0.022808	89.301	262680	147850	0	0	0	114830	0	0	0	0
AKGGAHEVI	P0A0F8	50S ribosomal protein L15	rplO SAOUHSC_02492	3920869	9	7.0017	880.477	P0A0F8	yes	yes	2	0.043502	105.14	16653000	3147600	1745700	0	2681500	4269200	1468600	816180	1712900	811050
ASAAEAIDAKGGA	P0A0F8	50S ribosomal protein L15	rplO SAOUHSC_02492	3920869	13	4.184	1130.56	P0A0F8	yes	yes	2	0.036651	86.288	230940	230940	0	0	0	0	0	0	0	0
ASAAEAIDAKGGAHEVI	P0A0F8	50S ribosomal protein L15	rplO SAOUHSC_02492	3920869	17	4.421	1608.81	P0A0F8	yes	yes	2	5.5753e-05	110.84	135430	135430	0	0	0	0	0	0	0	0
NGSLDKKLT	P0A0F8	50S ribosomal protein L15	rplO SAOUHSC_02492	3920869	9	8.9961	974.54	P0A0F8	yes	yes	2	0.018472	120.99	828520	596490	63379	0	0	0	0	168660	0	0
QLNKFEDGTEVTPA	P0A0F8	50S ribosomal protein L15	rplO SAOUHSC_02492	3920869	14	3.9274	1547.75	P0A0F8	yes	yes	2	0.00024101	110.31	314170	314170	0	0	0	0	0	0	0	0
SAAEAIDAKGGAHEVI	P0A0F8	50S ribosomal protein L15	rplO SAOUHSC_02492	3920869	16	4.421	1537.77	P0A0F8	yes	yes	3	0.00057628	107.99	1527600	734730	20956	109950	0	661990	0	0	0	0
AQHDEAQQNAFY	P02976	Immunoglobulin G-binding protein A (IgG-binding protein A) (Staphylococcal protein A) (SpA)	spa SAOUHSC_00069	3919448	12	4.1808	1420.6	P02976	yes	yes	2	0.011491	99.752	858830	317950	61480	282660	0	0	0	36709	51548	108490
AQHDEAQQNAFYQ	P02976	Immunoglobulin G-binding protein A (IgG-binding protein A) (Staphylococcal protein A) (SpA)	spa SAOUHSC_00069	3919448	13	4.1808	1548.66	P02976	yes	yes	2	0.0001319	126.83	838220	143060	234050	223320	14815	0	0	30502	72235	120250
AQHDEAQQNAFYQVLN	P02976	Immunoglobulin G-binding protein A (IgG-binding protein A) (Staphylococcal protein A) (SpA)	spa SAOUHSC_00069	3919448	16	4.1808	1874.85	P02976	yes	yes	2	4.9432e-10	129.01	172550	155200	0	0	0	17355	0	0	0	0
DDPSQSANVLG	P02976	Immunoglobulin G-binding protein A (IgG-binding protein A) (Staphylococcal protein A) (SpA)	spa SAOUHSC_00069	3919448	11	3.4918	1101.49	P02976	yes	yes	2	4.8219e-06	159.83	1593600	544510	762610	227130	0	0	0	0	27641	31740
DDPSQSTNVLG	P02976	Immunoglobulin G-binding protein A (IgG-binding protein A) (Staphylococcal protein A) (SpA)	spa SAOUHSC_00069	3919448	11	3.4918	1131.5	P02976	yes	yes	2	7.2339e-06	155.11	2207000	623420	725450	315080	172950	139310	91889	22005	97419	19456
DDPSVSKEILA	P02976	Immunoglobulin G-binding protein A (IgG-binding protein A) (Staphylococcal protein A) (SpA)	spa SAOUHSC_00069	3919448	11	3.8759	1172.59	P02976	yes	yes	2	0.021041	98.156	583800	148150	352070	83577	0	0	0	0	0	0
EAQKLNDSQAPKADAQ	P02976	Immunoglobulin G-binding protein A (IgG-binding protein A) (Staphylococcal protein A) (SpA)	spa SAOUHSC_00069	3919448	16	4.3699	1712.83	P02976	yes	yes	3	6.2444e-10	126.1	503350	185240	318110	0	0	0	0	0	0	0
EAQKLNDSQAPKADAQQN	P02976	Immunoglobulin G-binding protein A (IgG-binding protein A) (Staphylococcal protein A) (SpA)	spa SAOUHSC_00069	3919448	18	4.3699	1954.93	P02976	yes	yes	3	6.2817e-05	115.91	1280500	806810	274030	199670	0	0	0	0	0	0
FIQSLKDDPS	P02976	Immunoglobulin G-binding protein A (IgG-binding protein A) (Staphylococcal protein A) (SpA)	spa SAOUHSC_00069	3919448	10	4.109	1148.57	P02976	yes	no	2	0.0060266	123.75	1570200	388170	228580	808890	0	0	0	78393	31631	34574
FIQSLKDDPSQ	P02976	Immunoglobulin G-binding protein A (IgG-binding protein A) (Staphylococcal protein A) (SpA)	spa SAOUHSC_00069	3919448	11	4.109	1276.63	P02976	yes	no	2	0.00053097	142.08	298900	84929	74847	139120	0	0	0	0	0	0
IQSLKDDPSQSANVLG	P02976	Immunoglobulin G-binding protein A (IgG-binding protein A) (Staphylococcal protein A) (SpA)	spa SAOUHSC_00069	3919448	16	4.109	1670.85	P02976	yes	yes	2	3.0451e-10	133.25	966480	417120	257940	291410	0	0	0	0	0	0
IQSLKDDPSQSTNVLG	P02976	Immunoglobulin G-binding protein A (IgG-binding protein A) (Staphylococcal protein A) (SpA)	spa SAOUHSC_00069	3919448	16	4.109	1700.86	P02976	yes	yes	2	0.00079218	106.82	245080	137360	49738	57986	0	0	0	0	0	0
KDDPSQSANVLG	P02976	Immunoglobulin G-binding protein A (IgG-binding protein A) (Staphylococcal protein A) (SpA)	spa SAOUHSC_00069	3919448	12	4.109	1229.59	P02976	yes	yes	2	0.0019727	116.03	3832600	449540	1013300	270040	0	0	0	174080	349620	1576000
KDDPSQSTNVLG	P02976	Immunoglobulin G-binding protein A (IgG-binding protein A) (Staphylococcal protein A) (SpA)	spa SAOUHSC_00069	3919448	12	4.109	1259.6	P02976	yes	yes	2	0.0073795	104.87	796430	123490	219580	117680	0	0	0	60467	64402	210800
LKDDPSQSA	P02976	Immunoglobulin G-binding protein A (IgG-binding protein A) (Staphylococcal protein A) (SpA)	spa SAOUHSC_00069	3919448	9	4.109	959.456	P02976	yes	no	2	0.014858	123.86	903180	798240	81428	0	0	23512	0	0	0	0
LKDDPSQSAN	P02976	Immunoglobulin G-binding protein A (IgG-binding protein A) (Staphylococcal protein A) (SpA)	spa SAOUHSC_00069	3919448	10	4.109	1073.5	P02976	yes	no	2	0.00125	147.62	1599100	0	0	729510	0	493420	0	0	308600	67592
LKDDPSQSANLLA	P02976	Immunoglobulin G-binding protein A (IgG-binding protein A) (Staphylococcal protein A) (SpA)	spa SAOUHSC_00069	3919448	13	4.109	1370.7	P02976	yes	yes	2	0.027862	89.46	230770	111670	71442	47666	0	0	0	0	0	0
LKDDPSQSANVLG	P02976	Immunoglobulin G-binding protein A (IgG-binding protein A) (Staphylococcal protein A) (SpA)	spa SAOUHSC_00069	3919448	13	4.109	1342.67	P02976	yes	yes	2	0.00015715	125.03	20869000	6195900	8001200	6355800	0	0	0	219530	25593	71239
LKDDPSQSTNVLG	P02976	Immunoglobulin G-binding protein A (IgG-binding protein A) (Staphylococcal protein A) (SpA)	spa SAOUHSC_00069	3919448	13	4.109	1372.68	P02976	yes	yes	2	0.0001391	126.1	9687100	2587000	5064500	1920300	0	0	0	100170	0	15121
LNADQRNGFIQ	P02976	Immunoglobulin G-binding protein A (IgG-binding protein A) (Staphylococcal protein A) (SpA)	spa SAOUHSC_00069	3919448	11	5.79	1274.64	P02976	yes	yes	2	4.7664e-06	159.94	1584600	344700	736040	503810	0	0	0	0	0	0
MPNLNADQRN	P02976	Immunoglobulin G-binding protein A (IgG-binding protein A) (Staphylococcal protein A) (SpA)	spa SAOUHSC_00069	3919448	10	5.79	1171.54	P02976	yes	yes	2	2.482e-05	162.36	676820	260590	231790	160080	0	0	0	11907	0	12455
MPNLNADQRNGFIQ	P02976	Immunoglobulin G-binding protein A (IgG-binding protein A) (Staphylococcal protein A) (SpA)	spa SAOUHSC_00069	3919448	14	5.79	1616.77	P02976	yes	yes	2	0.00047119	109.44	48401	48401	0	0	0	0	0	0	0	0
SLKDDPSQSAN	P02976	Immunoglobulin G-binding protein A (IgG-binding protein A) (Staphylococcal protein A) (SpA)	spa SAOUHSC_00069	3919448	11	4.109	1160.53	P02976	yes	no	2	2.8353e-10	190.53	331390	139110	153060	0	0	0	0	16537	22686	0
SLKDDPSQSANLLA	P02976	Immunoglobulin G-binding protein A (IgG-binding protein A) (Staphylococcal protein A) (SpA)	spa SAOUHSC_00069	3919448	14	4.109	1457.74	P02976	yes	yes	2	0.03058	86.291	1383000	607000	581020	194990	0	0	0	0	0	0
SLKDDPSQSANVLG	P02976	Immunoglobulin G-binding protein A (IgG-binding protein A) (Staphylococcal protein A) (SpA)	spa SAOUHSC_00069	3919448	14	4.109	1429.7	P02976	yes	yes	2	8.7894e-06	121.24	9073900	4985000	2706300	1291600	0	0	0	34253	20589	36145
SLKDDPSQSTNVLG	P02976	Immunoglobulin G-binding protein A (IgG-binding protein A) (Staphylococcal protein A) (SpA)	spa SAOUHSC_00069	3919448	14	4.109	1459.72	P02976	yes	yes	2	0.0074076	95.264	11549000	5597500	3917200	1933900	0	0	0	74682	0	25278
GGPASGSAAIYT	O05204	Alkyl hydroperoxide reductase subunit F (EC 1.8.1.-)	ahpF SAOUHSC_00364	3919783	12	5.5494	1050.5	O05204	yes	yes	2	0.0062343	106.29	186660	125620	19096	41935	0	0	0	0	0	0
