# Supplementary material for: Proteomic profiling of the endogenous peptides of MRSA and MSSA
Source: PeerJ journal article supplement (doi:10.7717/peerj.12508), 2021-11-24
Supplement: Supplementary_Table_S2.xlsx [file Supplementary_Table_S2.xlsx]

## Sheet: Sheet1
Table S2. The properties of DE endogenous peptides between MSSA and MRSA
Sequence	Length	Mass	Proteins	Unique..Groups.	Unique..Proteins.	Charges	PEP	Score	Intensity	Intensity.25923.1	Intensity.25923.2	Intensity.25923.3	Intensity.43300.1	Intensity.43300.2	Intensity.43300.3	Intensity.patient.1	Intensity.patient.2	Intensity.patient.3	Oxidation..M..site.IDs	Entry	Protein.names	Gene.names	GeneID	Normalization	log2_Intensity.25923.1	log2_Intensity.25923.2	log2_Intensity.25923.3	log2_Intensity.43300.1	log2_Intensity.43300.2	log2_Intensity.43300.3	log2_Intensity.patient.1	log2_Intensity.patient.2	log2_Intensity.patient.3	Staph_Sentitive_25923	Staph_MARSA_43300	Staph_MARSA_Patients	X.Log.ANOVA.p.value	ANOVA.Significant	ANOVA.q.value	fc	cluster
ALLPYVKEEQ	10	1188.64	Q2G111	yes	yes	2	0.0027923	137.95	3536300	2706800	153750	511010	50332	86036	14792	13593	0	0		Q2G111	30S ribosomal protein S18	rpsR SAOUHSC_00350	3921823	**>	21.3682	17.2302	18.963	15.6192	16.3927	13.8525	13.7306	12.8594	12.8428	19.1871	15.2881	13.1443	2.21866	+	0.00189388	4.97093	cluster1
APTYHNYSTSTT	12	1341.58	Q2FV52	yes	yes	2	0.0003543	136.96	766180	240350	324330	201490	0	0	0	0	0	0		Q2FV52	Probable transglycosylase IsaA (EC 3.2.-.-) (Immunodominant staphylococcal antigen A)	isaA SAOUHSC_02887	3921556	**>	17.8748	18.3071	17.6203	12.5706	11.9973	13.047	12.8486	13.5426	13.2614	17.9341	12.5383	13.2176	5.12161	+	0	5.05614	cluster1
DKPTDFNSEKQSL	13	1507.72	Q2G2S6	yes	yes	2,3	0.002343	107.53	721580	113300	76443	515470	0	0	16360	0	0	0		Q2G2S6	Foldase protein PrsA (EC 5.2.1.8)	prsA SAOUHSC_01972	3920448	**>	16.7898	16.2221	18.9755	12.1983	14.7516	13.9979	13.6114	12.4539	11.8489	17.3291	13.6493	12.6381	2.08214	+	0.00213523	4.18547	cluster1
DSVSFGQRVV	10	1092.56	Q2FXS6	yes	yes	2	1.0075e-13	207.83	1017000	455290	140710	297700	32008	37067	19468	0	21950	12800		Q2FXS6	Cell shape-determining protein MreC (Cell shape protein MreC)	SAOUHSC_01759	3920557	**>	18.7964	17.1024	18.1835	14.9661	15.1778	14.2488	13.6466	14.4219	13.6439	18.0274	14.7976	13.9041	3.3443	+	0	3.67657	cluster1
ASIPASQKANLGNQN	15	1511.77	Q2G170	yes	yes	2	6.2049e-08	133.48	1272800	442930	407290	383570	0	0	21404	0	17629	0		Q2G170	5'-nucleotidase, lipoprotein e(P4) family	SAOUHSC_00284	3918967	**>	18.7567	18.6357	18.5491	12.5827	14.523	14.3856	12.3356	14.1057	12.2675	18.6472	13.8304	12.9029	3.39793	+	0	5.28051	cluster1
DANGIASYRAA	11	1107.53	Q2FY36	yes	yes	2	0.00012287	151.79	2285500	1368600	137760	735180	15153	28813	0	0	0	0		Q2FY36	Uncharacterized protein	SAOUHSC_01630	3919968	**>	20.3843	17.0718	19.4877	13.8873	14.8144	13.2627	11.4902	11.9884	13.2428	18.9813	13.9882	12.2404	2.92201	+	0	5.86697	cluster1
AIFGGMALNNHNN	13	1371.64	Q2FYF1	yes	yes	2	5.83e-05	134.75	552040	245930	72430	203510	0	16681	0	13500	0	0	32	Q2FYF1	Elastin-binding protein EbpS	ebpS SAOUHSC_01501	3919044	**>	17.9079	16.1443	17.6347	13.6684	14.0259	12.0969	13.7207	11.6209	12.5023	17.229	13.2637	12.6146	2.55476	+	0.0005	4.28981	cluster1
ANTKDVDALKDKN	13	1430.74	Q2FVX4	yes	yes	3	7.0953e-05	133.05	617250	263900	137830	215520	0	0	0	0	0	0		Q2FVX4	Molybdenum ABC transporter, periplasmic molybdate-binding protein	SAOUHSC_02549	3921137	**>	18.0096	17.0725	17.7175	14.5533	13.9219	12.9452	12.4016	12.9137	12.8035	17.5999	13.8068	12.7063	4.00451	+	0	4.34334	cluster1
AELPQSRIN	9	1026.55	Q2G2Q0	yes	yes	2	0.0070239	134.68	588980	246460	46143	187910	0	26757	0	40835	24438	16442		Q2G2Q0	DNA gyrase subunit A (EC 5.6.2.3)	gyrA SAOUHSC_00006	3919179	**>	17.911	15.4938	17.5197	13.7822	14.7076	12.8584	15.3175	14.5768	14.0051	16.9748	13.7827	14.6332	1.72527	+	0.00418028	2.76688	cluster1
AAIATVLAKNGDSVA	15	1399.77	Q2G0N0	yes	yes	2	3.4844e-14	157.2	3115900	2118900	77885	905410	0	0	0	13774	0	0		Q2G0N0	Elongation factor Tu (EF-Tu)	tuf SAOUHSC_00530	3920383	**>	21.0149	16.2491	19.7882	12.4286	14.0828	13.3594	13.7497	13.2843	11.8084	19.0174	13.2902	12.9474	2.20913	+	0.00194332	5.89854	cluster1
EIQVAAAA	8	771.413	Q2FVX4	yes	yes	2	0.0020528	182.13	646140	222520	83523	158160	57656	54252	23917	0	15429	30689		Q2FVX4	Molybdenum ABC transporter, periplasmic molybdate-binding protein	SAOUHSC_02549	3921137	**>	17.7636	16.3499	17.271	15.8152	15.7274	14.5457	12.7532	13.9134	14.9054	17.1282	15.3628	13.8573	2.01406	+	0.0022585	2.51811	cluster1
EAQKLNDSQAPKADAQQN	18	1954.93	P02976	yes	yes	3	6.2817e-05	115.91	1280500	806810	274030	199670	0	0	0	0	0	0		P02976	Immunoglobulin G-binding protein A (IgG-binding protein A) (Staphylococcal protein A) (SpA)	spa SAOUHSC_00069	3919448	**>	19.6219	18.064	17.6073	13.2417	12.1804	14.1317	13.2456	13.2557	12.0297	18.431	13.1846	12.8437	3.287	+	0	5.4169	cluster1
ASIPASQKANLG	12	1155.62	Q2G170	yes	yes	2	0.005643	107.03	847660	297720	309960	239980	0	0	0	0	0	0		Q2G170	5'-nucleotidase, lipoprotein e(P4) family	SAOUHSC_00284	3918967	**>	18.1836	18.2417	17.8726	13.2777	13.1163	13.2425	12.7629	11.1433	12.0105	18.0993	13.2122	11.9722	4.98122	+	0	5.50709	cluster1
AEKYSEMIGE	10	1155.51	Q2FZZ8	yes	yes	2	0.0027632	138.22	4309000	2539800	517840	1176800	21337	0	0	34977	0	18195	56	Q2FZZ8	Glycine cleavage system H protein (Octanoyl/lipoyl carrier protein)	gcvH SAOUHSC_00836	3918948	**>	21.2763	18.9821	20.1664	14.3811	13.393	13.893	15.0941	13.2863	14.1513	20.1416	13.889	14.1772	3.66959	+	0	6.10849	cluster1
DNGKKQEIQV	10	1157.6	Q2FVX4	yes	yes	2	0.0036809	129.85	2001700	0	742770	1228400	0	0	24037	0	0	6484.9		Q2FVX4	Molybdenum ABC transporter, periplasmic molybdate-binding protein	SAOUHSC_02549	3921137	**>	15.1617	19.5026	20.2283	12.6742	13.2357	14.553	12.8547	11.2252	12.6629	18.2975	13.4876	12.2476	1.90624	+	0.00259119	5.42992	cluster1
DYDNQVAQDT	10	1167.47	Q2G188	yes	yes	2	2.482e-05	162.36	1124100	247950	424020	344430	67390	17922	22350	0	0	0		Q2G188	ESAT-6 secretion accessory factor EsaA	esaA SAOUHSC_00258	3919200	**>	17.9197	18.6938	18.3939	16.0402	14.1294	14.448	11.4308	11.2227	12.2095	18.3358	14.8726	11.621	4.1405	+	0	5.08898	cluster1
ASIPASQKA	9	871.476	Q2G170	yes	yes	2	0.00248	146.69	1327100	847210	216850	230540	0	0	0	0	32476	0		Q2G170	5'-nucleotidase, lipoprotein e(P4) family	SAOUHSC_00284	3918967	**>	19.6924	17.7263	17.8147	12.3245	14.1126	13.4659	12.8492	14.9871	13.4665	18.4111	13.301	13.7676	2.76315	+	0	4.87681	cluster1
DGDKSRYLG	9	1009.48	Q2G028	yes	yes	2	0.025128	115.7	2141600	1325200	36121	780320	0	0	0	0	0	0		Q2G028	Enolase (EC 4.2.1.11) (2-phospho-D-glycerate hydro-lyase) (2-phosphoglycerate dehydratase)	eno SAOUHSC_00799	3919362	**>	20.3378	15.1406	19.5737	12.2442	14.5823	11.722	12.4568	13.3049	12.1764	18.3507	12.8495	12.6461	1.80009	+	0.00339645	5.6029	cluster1
DYTGQAMVT	9	984.422	Q2FVQ2	yes	yes	2	1.6459e-09	199.46	620830	110630	348810	150370	0	0	0	11024	0	0	14	Q2FVQ2	Uncharacterized lipoprotein SAOUHSC_02650	SAOUHSC_02650	3921212	**>	16.7554	18.4121	17.1982	12.1239	13.2382	13.4983	13.4284	12.1525	13.1411	17.4552	12.9535	12.9073	3.33452	+	0	4.52482	cluster1
ALGEVKTVPA	10	983.565	Q2FVX4	yes	yes	2	0.0061531	123.63	1447800	180190	271670	952670	0	0	20920	0	22306	0		Q2FVX4	Molybdenum ABC transporter, periplasmic molybdate-binding protein	SAOUHSC_02549	3921137	**>	17.4592	18.0515	19.8616	13.4511	12.8891	14.3526	11.6034	14.4451	12.6713	18.4574	13.5643	12.9066	2.64482	+	0.000218579	5.22199	cluster1
DEEEVEVPDKQQQVNEAPAKEQS	23	2625.2	Q2FZ86	yes	yes	3	7.358e-29	176.42	954820	282870	0	671950	0	0	0	0	0	0		Q2FZ86	Cell division protein SepF	sepF SAOUHSC_01154	3920713	**>	18.1098	14.5954	19.358	14.1231	14.5965	12.9593	12.3452	12.8647	11.7687	17.3544	13.893	12.3262	1.73716	+	0.00405682	4.24481	cluster1
APKIEEDYT	9	1064.5	Q2FZK7	yes	yes	2	0.00058151	169.44	649500	57305	209610	382580	0	0	0	0	0	0		Q2FZK7	Bifunctional autolysin [Includes: N-acetylmuramoyl-L-alanine amidase (EC 3.5.1.28); Mannosyl-glycoprotein endo-beta-N-acetylglucosaminidase (EC 3.2.1.96)]	atl nag SAOUHSC_00994	3920394	**>	15.8064	17.6773	18.5454	12.4334	13.8465	12.3561	13.8537	12.7548	11.0258	17.343	12.8786	12.5447	2.24122	+	0.00170248	4.63136	cluster1
AQHDEAQQNAFY	12	1420.6	P02976	yes	yes	2	0.011491	99.752	858830	317950	61480	282660	0	0	0	36709	51548	108490		P02976	Immunoglobulin G-binding protein A (IgG-binding protein A) (Staphylococcal protein A) (SpA)	spa SAOUHSC_00069	3919448	**>	18.2784	15.9078	18.1087	13.7593	13.3078	12.6707	15.1638	15.6536	16.7272	17.4317	13.2459	15.8482	2.33147	+	0.00157848	2.88457	cluster1
DAGDRLFGTK	10	1078.54	Q2FWE6	yes	yes	2	0.0012943	147.37	645430	379730	46115	198680	0	0	0	0	0	20899		Q2FWE6	Uracil phosphoribosyltransferase (EC 2.4.2.9) (UMP pyrophosphorylase) (UPRTase)	upp SAOUHSC_02353	3919396	**>	18.5346	15.4929	17.6001	11.993	13.1892	13.4729	12.3043	13.538	14.3511	17.2092	12.885	13.3978	2.11694	+	0.00221402	4.06778	cluster1
ESGLKNGGYQVM	12	1281.6	Q2G188	yes	yes	2	3.3323e-07	159.09	1093600	196190	580920	299090	17372	0	0	0	0	0	73	Q2G188	ESAT-6 secretion accessory factor EsaA	esaA SAOUHSC_00258	3919200	**>	17.5819	19.148	18.1902	14.0845	14.2276	13.0336	12.2443	13.0147	13.5105	18.3067	13.7819	12.9232	3.78325	+	0	4.95418	cluster1
DPKEATAESRE	11	1231.57	Q2G170	yes	yes	2	0.0012657	136.53	6709300	888570	986110	4834600	0	0	0	0	0	0		Q2G170	5'-nucleotidase, lipoprotein e(P4) family	SAOUHSC_00284	3918967	**>	19.7611	19.9114	22.205	13.5882	12.7753	11.5484	11.7126	13.5287	12.3183	20.6258	12.6373	12.5199	3.77375	+	0	8.04723	cluster1
DKPTDFNSEKQ	11	1307.6	Q2G2S6	yes	yes	2	0.00053048	142.1	3246500	338940	965230	1723200	219180	0	0	0	0	0		Q2G2S6	Foldase protein PrsA (EC 5.2.1.8)	prsA SAOUHSC_01972	3920448	**>	18.3707	19.8805	20.7167	17.7418	13.1787	12.5542	11.4337	12.5617	13.7893	19.6559	14.4916	12.5949	2.01684	+	0.00227397	6.11272	cluster1
APTAVKPTTS	10	971.529	Q2FZK7	yes	yes	2	0.0062679	123.51	615260	141670	189540	232360	0	0	0	0	0	51699		Q2FZK7	Bifunctional autolysin [Includes: N-acetylmuramoyl-L-alanine amidase (EC 3.5.1.28); Mannosyl-glycoprotein endo-beta-N-acetylglucosaminidase (EC 3.2.1.96)]	atl nag SAOUHSC_00994	3920394	**>	17.1122	17.5321	17.826	12.2184	13.2919	12.2367	13.4238	12.8967	15.6578	17.4901	12.5823	13.9928	2.74359	+	0	4.20256	cluster1
DQQLSNNFGLQ	11	1262.59	Q2G189	yes	yes	2	2.28e-20	216.03	996960	242630	302280	327860	124200	0	0	0	0	0		Q2G189	ESAT-6 secretion system extracellular protein A (Ess extracellular protein A)	esxA SAOUHSC_00257	3919199	**>	17.8884	18.2055	18.3227	16.9223	13.5725	13.1955	13.4477	12.417	11.9174	18.1389	14.5634	12.5941	2.3057	+	0.00152381	4.56014	cluster1
AIATVLAKNGDSVA	14	1328.73	Q2G0N0	yes	yes	2	0.00085704	107.99	1115100	808820	103030	155090	0	0	0	28586	8725.8	10895		Q2G0N0	Elongation factor Tu (EF-Tu)	tuf SAOUHSC_00530	3920383	**>	19.6255	16.6527	17.2427	13.2614	14.3019	14.0856	14.803	13.0911	13.4114	17.8403	13.883	13.7685	2.21421	+	0.00195122	4.01457	cluster1
AIKQFDPKT	9	1046.58	Q2G170	yes	yes	2	0.0013407	153.05	4640700	3224200	462030	954410	0	0	0	0	0	0		Q2G170	5'-nucleotidase, lipoprotein e(P4) family	SAOUHSC_00284	3918967	**>	21.6205	18.8176	19.8643	12.906	12.8283	13.2558	12.5864	11.7283	11.9134	20.1008	12.9967	12.076	4.27368	+	0	7.56442	cluster1
AISEQDAQASIK	12	1259.64	Q2FXM1	yes	yes	2	7.6123e-45	247.67	1080300	784890	44281	251090	0	0	0	0	0	0		Q2FXM1	Uncharacterized protein	SAOUHSC_01814	3919284	**>	19.5821	15.4344	17.9378	13.7438	12.89	12.9635	13.6392	13.0686	13.4426	17.6515	13.1991	13.3835	2.11659	+	0.00220588	4.36017	cluster1
APTVEGATVT	10	944.481	Q2FXS8	yes	yes	2	0.011579	118.33	1030000	607700	173550	233740	0	0	0	15051	0	0		Q2FXS8	50S ribosomal protein L21	rplU SAOUHSC_01757	3920555	**>	19.213	17.405	17.8345	14.2266	13.2914	12.8697	13.8776	14.2354	12.4742	18.1508	13.4626	13.529	3.08456	+	0	4.65504	cluster1
EAQHGNNQPAVKE	13	1420.67	Q2FYZ4	yes	yes	2,3	5.1356e-10	162.31	997080	707610	199710	89757	0	0	0	0	0	0		Q2FYZ4	Aerobic glycerol-3-phosphate dehydrogenase (EC 1.1.5.3)	glpD SAOUHSC_01278	3919930	**>	19.4326	17.6075	16.4537	12.8696	14.1723	13.4644	12.6605	12.4388	12.5579	17.8313	13.5021	12.5524	2.97623	+	0	4.80403	cluster1
DDPSQSANVLG	11	1101.49	P02976	yes	yes	2	4.8219e-06	159.83	1593600	544510	762610	227130	0	0	0	0	27641	31740		P02976	Immunoglobulin G-binding protein A (IgG-binding protein A) (Staphylococcal protein A) (SpA)	spa SAOUHSC_00069	3919448	**>	19.0546	19.5406	17.7932	13.2831	13.9563	13.6247	11.9467	14.7545	14.954	18.7961	13.6214	13.8851	2.67407	+	0.000223464	5.04289	cluster1
ADNGKKQEIQVAA	13	1370.72	Q2FVX4	yes	yes	2	0.016327	93.623	2030000	1123400	444060	462540	0	0	0	0	0	0		Q2FVX4	Molybdenum ABC transporter, periplasmic molybdate-binding protein	SAOUHSC_02549	3921137	**>	20.0994	18.7604	18.8192	14.2706	13.3395	11.1976	12.7743	13.648	12.4613	19.2264	12.9359	12.9612	3.28838	+	0	6.27781	cluster1
AMEGEQQTEEPEVVG	15	1631.7	Q2G0S0	yes	yes	2	3.767e-14	156.24	3831700	2030000	359930	1381100	0	0	0	60658	0	0	60	Q2G0S0	50S ribosomal protein L25 (General stress protein CTC)	rplY ctc SAOUHSC_00474	3920334	**>	20.953	18.4574	20.3974	13.8053	14.699	12.7278	15.8884	13.5077	11.8179	19.9359	13.744	13.738	2.45539	+	0.000843137	6.19493	cluster1
DPKTNEPTRVG	11	1212.61	Q2FW17	yes	yes	2	0.011515	107.03	1144300	562350	121560	460380	0	0	0	0	0	0		Q2FW17	50S ribosomal protein L24	rplX SAOUHSC_02501	3920877	**>	19.1011	16.8913	18.8125	11.8736	13.7771	12.2088	12.9052	12.3177	12.6835	18.2683	12.6198	12.6354	3.38248	+	0	5.64066	cluster1
APNGGGYVKGPNP	13	1226.6	Q2FZ94	yes	yes	2	0.0010209	110.08	524520	176240	156900	191380	0	0	0	0	0	0		Q2FZ94	Penicillin-binding protein 1	SAOUHSC_01145	3920705	**>	17.4272	17.2595	17.5461	14.6342	12.449	12.1614	12.3114	12.1163	12.9854	17.4109	13.0815	12.471	3.19067	+	0	4.63465	cluster1
DNKGLDATVVT	11	1131.58	Q2G0G1	yes	yes	2	0.00038915	145.46	847930	274820	129640	443480	0	0	0	0	0	0		Q2G0G1	Alcohol dehydrogenase (ADH) (EC 1.1.1.1)	adh SAOUHSC_00608	3918927	**>	18.0681	16.9842	18.7585	13.6818	13.9875	12.945	14.028	12.5636	13.4229	17.9369	13.5381	13.3382	3.38568	+	0	4.4988	cluster1
EAFDNGASDKLLS	13	1365.64	Q2FWP1	yes	yes	2	1.7791e-06	143.31	1183500	450310	157210	544170	0	0	0	31848	0	0		Q2FWP1	Phospholipase C (EC 3.1.4.3) (Beta-hemolysin) (Beta-toxin) (Sphingomyelinase) (SMase)	hlb SAOUHSC_02163/SAOUHSC_02240		**>	18.7806	17.2623	19.0537	13.3282	14.2025	13.1568	14.9589	11.84	13.303	18.3655	13.5625	13.3673	2.63077	+	0.000217391	4.90061	cluster1
EKQAETLSHLS	11	1241.63	Q2G0Z9	yes	yes	2	2.7449e-14	201.84	1869000	465190	1019700	384140	0	0	0	0	0	0		Q2G0Z9	Uncharacterized protein	SAOUHSC_00362	3919781	**>	18.8275	19.9597	18.5513	13.0154	13.3994	12.1119	12.8188	12.3359	12.3644	19.1128	12.8422	12.5064	4.80356	+	0	6.43851	cluster1
AAASLTDVTKK	11	1103.62	Q2FVX4	yes	yes	2	0.0005726	141.1	2949000	573670	2024200	351100	0	0	0	0	0	0		Q2FVX4	Molybdenum ABC transporter, periplasmic molybdate-binding protein	SAOUHSC_02549	3921137	**>	19.1299	20.9489	18.4215	12.5714	13.9779	11.6697	12.0193	12.6784	12.117	19.5001	12.7396	12.2716	3.64763	+	0	6.9945	cluster1
ALQQLPNFQT	10	1158.6	Q2FVQ2	yes	yes	2	4.1599e-05	157.66	1069500	781360	58715	140750	69222	0	19450	0	0	0		Q2FVQ2	Uncharacterized lipoprotein SAOUHSC_02650	SAOUHSC_02650	3921212	**>	19.5756	15.8414	17.1028	16.0789	11.8512	14.2475	12.8146	12.3384	12.9095	17.5066	14.0592	12.6875	1.53816	+	0.00560814	4.13325	cluster1
AGATSDSKLAKE	12	1176.6	Q2FVX4	yes	yes	2	0.00024182	138.45	661070	116690	264680	279710	0	0	0	0	0	0		Q2FVX4	Molybdenum ABC transporter, periplasmic molybdate-binding protein	SAOUHSC_02549	3921137	**>	16.8323	18.0139	18.0936	13.3368	13.5199	12.7945	12.1555	12.124	12.3495	17.6466	13.2171	12.2097	4.78164	+	0	4.93322	cluster1
ESNTNQDTNTTKDVI	15	1678.76	Q2G105	yes	yes	2	5.1906e-10	142.1	407270	55300	209440	142530	0	0	0	0	0	0		Q2G105	Uncharacterized protein	SAOUHSC_00356	3921829	**>	15.755	17.6762	17.1209	13.5852	13.3933	12.1188	13.8076	11.8674	13.1042	16.8507	13.0324	12.9264	2.50084	+	0.000646465	3.87128	cluster1
ETTGGNTKVSVLQT	14	1433.74	Q2FXJ6	yes	yes	2	1.3483e-26	184.34	585230	96152	191200	276450	0	0	0	0	21431	0		Q2FXJ6	Uncharacterized protein	SAOUHSC_01838	3921788	**>	16.553	17.5447	18.0767	12.5612	14.4307	12.5911	12.109	14.3874	12.2527	17.3915	13.1943	12.9164	2.45702	+	0.000847291	4.33611	cluster1
DPKEATAESREA	12	1302.61	Q2G170	yes	yes	2,3	0.0017551	118.76	2233100	671610	967300	594160	0	0	0	0	0	0		Q2G170	5'-nucleotidase, lipoprotein e(P4) family	SAOUHSC_00284	3918967	**>	19.3573	19.8836	19.1805	12.2815	13.4353	11.6645	12.8291	12.7086	13.076	19.4738	12.4604	12.8712	5.05933	+	0	6.80796	cluster1
DDPSVSKEILA	11	1172.59	P02976	yes	yes	2	0.021041	98.156	583800	148150	352070	83577	0	0	0	0	0	0		P02976	Immunoglobulin G-binding protein A (IgG-binding protein A) (Staphylococcal protein A) (SpA)	spa SAOUHSC_00069	3919448	**>	17.1767	18.4255	16.3508	13.7885	13.5002	14.4292	12.5333	12.1744	12.7933	17.3177	13.9059	12.5003	3.44057	+	0	4.11454	cluster1
ASYSTSSNNVQVTTT	15	1558.71	Q2G2J2	yes	yes	2	0.0012581	105.14	552640	67608	157660	184040	0	0	0	58567	51989	32774		Q2G2J2	Staphylococcal secretory antigen ssaA2	ssaA2 SAOUHSC_02571	3921568	**>	16.0449	17.2665	17.4897	11.9848	13.1836	13.5776	15.8378	15.6659	15.0003	16.9337	12.9153	15.5013	2.91351	+	0	2.72535	cluster1
AKDMDTIVS	9	978.469	Q2FY08	yes	yes	2	0.010961	128.36	1148700	813440	68238	249250	17791	0	0	0	0	0		Q2FY08	Glycine--tRNA ligase (EC 6.1.1.14) (Glycyl-tRNA synthetase) (GlyRS)	glyQS SAOUHSC_01666	3920078	**>	19.6337	16.0583	17.9272	14.1189	13.8176	12.4971	13.8175	14.447	11.9067	17.8731	13.4779	13.3904	1.94876	+	0.0025974	4.43894	cluster1
AAPNGGGYVKGPNP	14	1297.64	Q2FZ94	yes	yes	2	1.2014e-09	144.57	762550	228610	116470	417470	0	0	0	0	0	0		Q2FZ94	Penicillin-binding protein 1	SAOUHSC_01145	3920705	**>	17.8025	16.8296	18.6713	12.947	13.4474	12.1533	12.6794	14.3643	12.9178	17.7678	12.8492	13.3205	3.18119	+	0	4.68293	cluster1
AAASLTDVTKKL	12	1216.7	Q2FVX4	yes	yes	2	0.00064872	133.05	957640	282900	336700	229750	0	108290	0	0	0	0		Q2FVX4	Molybdenum ABC transporter, periplasmic molybdate-binding protein	SAOUHSC_02549	3921137	**>	18.1099	18.3611	17.8097	12.8737	16.7245	14.0791	12.1119	13.1711	13.5434	18.0936	14.5591	12.9421	2.24899	+	0.00171667	4.34296	cluster1
QAMVTDPNYQQ	11	1293.57	Q2FVQ2	yes	yes	2	0.00017885	150.46	740960	136030	233660	144210	43531	22601	24551	95488	16193	24704		Q2FVQ2	Uncharacterized lipoprotein SAOUHSC_02650	SAOUHSC_02650	3921212	**>	17.0536	17.8341	17.1378	15.4098	14.4641	14.5835	16.543	13.9831	14.5925	17.3418	14.8191	15.0395	1.67544	+	0.00455738	2.41249	cluster1
NFNGEGFSRQ	10	1154.51	Q2FZJ9	yes	yes	2	0.019829	110.38	596800	170180	99598	231970	0	38261	0	0	0	56793		Q2FZJ9	Probable quinol oxidase subunit 2 (EC 1.10.3.-) (Quinol oxidase polypeptide II)	qoxA SAOUHSC_01002	3920402	**>	17.3767	16.6038	17.8236	13.0549	15.2236	14.2813	13.6311	13.143	15.7934	17.268	14.1866	14.1892	1.69405	+	0.00427624	3.08015	cluster1
IEKQITDINQT	11	1301.68	Q2G067	yes	yes	2	3.2687e-14	199.82	417680	74144	89837	171660	37581	26391	0	0	18068	0		Q2G067	Uncharacterized protein	SAOUHSC_00754	3919515	**>	16.178	16.455	17.3892	15.1977	14.6878	12.5453	13.0784	14.1411	13.5348	16.6741	14.1436	13.5848	1.82148	+	0.00326946	2.80989	cluster1
ITELNIND	8	930.466	Q2G0S0	yes	yes	2	0.013069	159.58	495060	90520	73908	269140	30411	0	19581	0	11502	0		Q2G0S0	50S ribosomal protein L25 (General stress protein CTC)	rplY ctc SAOUHSC_00474	3920334	**>	16.4659	16.1734	18.038	14.8923	14.0712	14.2572	13.4093	13.4896	12.856	16.8925	14.4069	13.2516	2.85213	+	0	3.06321	cluster1
TSSNNVQVTTTM	12	1281.59	Q2G2J2	yes	yes	2	1.8836e-11	178.71	552580	57601	200430	199100	0	0	0	42576	21845	31035		Q2G2J2	Staphylococcal secretory antigen ssaA2	ssaA2 SAOUHSC_02571	3921568	**>	15.8138	17.6127	17.6031	13.3523	13.8399	12.8409	15.3778	14.415	14.9216	17.0099	13.3444	14.9048	2.63048	+	0.000216216	2.88532	cluster1
NAKSPVNVMQ	10	1086.55	Q2FZK7	yes	yes	2	0.0029014	136.96	429840	63560	158500	190150	0	0	0	17629	0	0		Q2FZK7	Bifunctional autolysin [Includes: N-acetylmuramoyl-L-alanine amidase (EC 3.5.1.28); Mannosyl-glycoprotein endo-beta-N-acetylglucosaminidase (EC 3.2.1.96)]	atl nag SAOUHSC_00994	3920394	**>	15.9558	17.2741	17.5368	13.3753	13.8753	12.43	14.1057	13.6419	13.2694	16.9222	13.2268	13.6723	2.93662	+	0	3.47266	cluster1
QASIPASQKANLGNQ	15	1525.78	Q2G170	yes	yes	2	0.002307	100.11	571930	160400	73188	338340	0	0	0	0	0	0		Q2G170	5'-nucleotidase, lipoprotein e(P4) family	SAOUHSC_00284	3918967	**>	17.2913	16.1593	18.3681	12.6832	14.6532	13.0674	13.4415	13.1016	13.7071	17.2729	13.4679	13.4167	2.55529	+	0.000502618	3.8306	cluster1
NGNTAGATGSSAAQIM	16	1449.65	Q2FV52	yes	yes	2	1.7823e-14	147.56	651360	56052	433270	119600	0	0	0	42435	0	0	8	Q2FV52	Probable transglycosylase IsaA (EC 3.2.-.-) (Immunodominant staphylococcal antigen A)	isaA SAOUHSC_02887	3921556	**>	15.7745	18.7249	16.8679	12.6823	14.3005	12.5349	15.373	13.646	12.8383	17.1224	13.1726	13.9524	1.70491	+	0.00416667	3.55991	cluster1
VSVETNVEKESE	12	1348.64	Q2G2D2	yes	yes	2	4.4172e-07	155.86	519230	69464	246730	184410	0	0	0	0	18634	0		Q2G2D2	Transcription termination/antitermination protein NusA	nusA SAOUHSC_01243	3920268	**>	16.084	17.9126	17.4926	13.1503	14.0321	12.7572	13.3446	14.1856	11.4714	17.163	13.3132	13.0006	2.31791	+	0.00154386	4.00616	cluster1
QQASIPASQKANLGNQ	16	1653.84	Q2G170	yes	yes	2	0.0011381	104.94	516130	210800	166930	138390	0	0	0	0	0	0		Q2G170	5'-nucleotidase, lipoprotein e(P4) family	SAOUHSC_00284	3918967	**>	17.6855	17.3489	17.0784	13.3482	13.9849	13.5326	12.8722	12.7243	13.9026	17.3709	13.6219	13.1664	4.29905	+	0	3.9768	cluster1
GSASEFSPTQLASA	14	1351.63	Q2FYI0	yes	yes	2	1.0306e-07	136.3	466840	188570	118440	159830	0	0	0	0	0	0		Q2FYI0	Penicillin-binding protein 2	SAOUHSC_01467	3919909	**>	17.5247	16.8538	17.2862	13.4331	14.1191	13.1764	13.6692	11.7469	13.258	17.2216	13.5762	12.8914	3.32131	+	0	3.9878	cluster1
TTQLREKYQN	10	1279.65	Q2FXL6	yes	yes	2	0.044432	92.538	673810	244620	137310	276210	0	0	0	0	15665	0		Q2FXL6	Putative universal stress protein SAOUHSC_01819	SAOUHSC_01819	3919289	**>	17.9002	17.0671	18.0754	13.5893	14.4283	14.0485	12.6768	13.9353	13.2629	17.6809	14.022	13.2917	3.91737	+	0	4.02404	cluster1
TAKSPVNVNQSYS	13	1393.68	Q2FZK7	yes	yes	2	9.9051e-10	156.08	595490	59584	214060	321850	0	0	0	0	0	0		Q2FZK7	Bifunctional autolysin [Includes: N-acetylmuramoyl-L-alanine amidase (EC 3.5.1.28); Mannosyl-glycoprotein endo-beta-N-acetylglucosaminidase (EC 3.2.1.96)]	atl nag SAOUHSC_00994	3920394	**>	15.8626	17.7077	18.296	13.3303	12.6485	13.3888	12.668	12.1025	13.711	17.2888	13.1225	12.8272	2.80831	+	0	4.31394	cluster1
KEVPELTD	8	929.471	Q2FXQ6	yes	yes	2	0.013213	160.11	1018100	709990	88223	153400	0	30322	15198	0	20924	0		Q2FXQ6	Trigger factor (TF) (EC 5.2.1.8) (PPIase)	tig SAOUHSC_01779	3919697	**>	19.4374	16.4289	17.2269	13.6805	14.8881	13.8916	12.8271	14.3529	12.2396	17.6977	14.1534	13.1398	2.16253	+	0.00219847	4.05114	cluster1
MPNLNADQRN	10	1171.54	P02976	yes	yes	2	2.482e-05	162.36	676820	260590	231790	160080	0	0	0	11907	0	12455		P02976	Immunoglobulin G-binding protein A (IgG-binding protein A) (Staphylococcal protein A) (SpA)	spa SAOUHSC_00069	3919448	**>	17.9914	17.8225	17.2884	13.218	12.6506	13.5305	13.5395	13.0994	13.6044	17.7008	13.133	13.4145	5.07197	+	0	4.42702	cluster1
LIGDKDSNYTS	11	1211.57	Q2FVX4	yes	yes	2	0.044111	88.338	731840	129930	185260	393870	0	0	11765	0	11013	0		Q2FVX4	Molybdenum ABC transporter, periplasmic molybdate-binding protein	SAOUHSC_02549	3921137	**>	16.9874	17.4992	18.5874	13.3362	15.7357	13.5222	12.8955	13.4269	12.9727	17.6913	14.198	13.0984	2.67864	+	0.000225989	4.0431	cluster1
SGAPVDVFMS	10	1008.46	Q2FVX4	yes	yes	2	0.0095105	120.99	604600	80223	172620	351760	0	0	0	0	0	0	15	Q2FVX4	Molybdenum ABC transporter, periplasmic molybdate-binding protein	SAOUHSC_02549	3921137	**>	16.2917	17.3972	18.4242	12.1865	13.5776	12.9906	11.8493	13.1949	13.2762	17.3711	12.9182	12.7735	3.00499	+	0	4.52523	cluster1
IEPNNSVLFE	10	1160.57	Q2FW07	yes	yes	2	0.044432	92.538	1098600	675510	80448	324260	0	0	0	18392	0	0		Q2FW07	50S ribosomal protein L4	rplD SAOUHSC_02511	3920887	**>	19.3656	16.2958	18.3068	13.1202	15.0945	13.9385	14.1668	12.5873	13.2545	17.9894	14.0511	13.3362	2.2579	+	0.00163404	4.29576	cluster1
TEKQAETL	8	918.466	Q2G0Z9	yes	yes	2	0.012981	153.08	926030	0	165760	760270	0	0	0	0	0	0		Q2G0Z9	Uncharacterized protein	SAOUHSC_00362	3919781	**>	15.4264	17.3387	19.5362	13.2802	13.3782	13.705	12.6353	13.4369	12.2482	17.4338	13.4545	12.7735	2.12041	+	0.00223048	4.31979	cluster1
SKDAQDQDNDDHGGGH	16	1694.65	Q2FZJ9	yes	yes	3	2.6366e-14	143.46	940180	0	114390	825790	0	0	0	0	0	0		Q2FZJ9	Probable quinol oxidase subunit 2 (EC 1.10.3.-) (Quinol oxidase polypeptide II)	qoxA SAOUHSC_01002	3920402	**>	15.3064	16.8036	19.6554	14.1926	14.0793	12.7712	12.1002	13.432	12.0926	17.2552	13.681	12.5416	1.79787	+	0.00336657	4.14384	cluster1
NSPYQGYASIH	11	1235.56	Q2G170	yes	yes	2	0.016483	102.4	576350	149660	176040	250660	0	0	0	0	0	0		Q2G170	5'-nucleotidase, lipoprotein e(P4) family	SAOUHSC_00284	3918967	**>	17.1913	17.4255	17.9354	12.8476	13.2332	13.3008	12.8777	13.1659	12.2063	17.5174	13.1272	12.75	5.04765	+	0	4.57884	cluster1
VSSLNGVAQIN	11	1100.58	Q2FZK7	yes	yes	2	0.010651	107.83	906950	162900	296260	372790	0	0	0	54876	0	20130		Q2FZK7	Bifunctional autolysin [Includes: N-acetylmuramoyl-L-alanine amidase (EC 3.5.1.28); Mannosyl-glycoprotein endo-beta-N-acetylglucosaminidase (EC 3.2.1.96)]	atl nag SAOUHSC_00994	3920394	**>	17.3136	18.1765	18.508	13.1256	13.5175	12.9979	15.7439	12.3679	14.2971	17.9994	13.2137	14.1363	2.50155	+	0.000649746	4.32439	cluster1
WVKQGDVIYN	10	1220.62	Q2FZK7	yes	yes	2	0.02583	105.2	571830	126550	157540	280360	0	0	0	7371.7	0	0		Q2FZK7	Bifunctional autolysin [Includes: N-acetylmuramoyl-L-alanine amidase (EC 3.5.1.28); Mannosyl-glycoprotein endo-beta-N-acetylglucosaminidase (EC 3.2.1.96)]	atl nag SAOUHSC_00994	3920394	**>	16.9493	17.2654	18.0969	12.7504	12.8954	12.2597	12.8478	12.9233	12.979	17.4372	12.6351	12.9167	5.03506	+	0	4.66129	cluster1
SVSGSGNQTFK	11	1110.53	Q2FZK7	yes	yes	2	0.0028618	127.87	823440	222260	299800	215850	0	0	0	85529	0	0		Q2FZK7	Bifunctional autolysin [Includes: N-acetylmuramoyl-L-alanine amidase (EC 3.5.1.28); Mannosyl-glycoprotein endo-beta-N-acetylglucosaminidase (EC 3.2.1.96)]	atl nag SAOUHSC_00994	3920394	**>	17.7619	18.1936	17.7197	13.1734	13.087	13.0001	16.3841	13.6836	12.1152	17.8917	13.0868	14.061	2.11866	+	0.00222222	4.31783	cluster1
KSSAEVQQTQQASIPASQ	18	1886.93	Q2G170	yes	yes	2	6.868e-13	148.06	733280	80826	253280	375590	0	23591	0	0	0	0		Q2G170	5'-nucleotidase, lipoprotein e(P4) family	SAOUHSC_00284	3918967	**>	16.3025	17.9504	18.5188	13.3843	14.5259	13.4706	13.2125	12.0903	12.8198	17.5906	13.7936	12.7075	3.07636	+	0	4.34	cluster1
KSSAEVQQTQQAS	13	1390.67	Q2G170	yes	yes	2	3.2714e-26	199.8	1127600	50977	114910	961690	0	0	0	0	0	0		Q2G170	5'-nucleotidase, lipoprotein e(P4) family	SAOUHSC_00284	3918967	**>	15.6376	16.8101	19.8752	13.8294	13.6286	11.6305	11.4572	12.8258	13.2968	17.441	13.0295	12.5266	1.824	+	0.00315916	4.66293	cluster1
YLQGYNSAKT	10	1143.56	Q2G170	yes	yes	2	0.0034178	132.25	594690	306690	129000	159000	0	0	0	0	0	0		Q2G170	5'-nucleotidase, lipoprotein e(P4) family	SAOUHSC_00284	3918967	**>	18.2264	16.977	17.2787	13.5728	14.6406	14.411	12.4494	12.6443	12.6429	17.494	14.2081	12.5789	4.24277	+	0	4.10053	cluster1
MASDASRVFK	10	1110.55	Q2FW06	yes	yes	2	5.8227e-06	167.67	931200	480090	43152	407960	0	0	0	0	0	0		Q2FW06	50S ribosomal protein L3	rplC SAOUHSC_02512	3920888	**>	18.8729	15.3971	18.6381	12.8116	14.18	12.3689	12.2613	12.9775	12.8903	17.6361	13.1202	12.7097	2.25681	+	0.00162025	4.72109	cluster1
SAEAKALYLQ	10	1092.58	Q2G170	yes	yes	2	0.0025583	140.07	889330	236890	165180	487260	0	0	0	0	0	0		Q2G170	5'-nucleotidase, lipoprotein e(P4) family	SAOUHSC_00284	3918967	**>	17.8539	17.3337	18.8943	14.1677	13.5791	12.9644	12.8082	13.5141	12.9535	18.0273	13.5704	13.0919	3.94322	+	0	4.69614	cluster1
NQDTNTTKDVIA	12	1318.64	Q2G105	yes	yes	2	0.0010625	127.56	1250500	308870	403080	427910	50269	47017	0	13378	0	0		Q2G105	Uncharacterized protein	SAOUHSC_00356	3921829	**>	18.2366	18.6207	18.7069	15.6174	15.5209	13.4613	13.7076	13.2909	13.5055	18.5214	14.8665	13.5013	3.41172	+	0	4.33751	cluster1
NLTDYDNQVAQDT	13	1495.64	Q2G188	yes	yes	2	4.847e-111	303.04	680710	130910	138110	280890	74929	41452	14421	0	0	0		Q2G188	ESAT-6 secretion accessory factor EsaA	esaA SAOUHSC_00258	3919200	**>	16.9982	17.0755	18.0996	16.1932	15.3392	13.8159	11.3474	12.2097	13.2756	17.3911	15.1161	12.2775	2.73048	+	0	3.69429	cluster1
GATSDSKLAKE	11	1105.56	Q2FVX4	yes	yes	2	7.9173e-08	174.4	609740	217970	206220	185550	0	0	0	0	0	0		Q2FVX4	Molybdenum ABC transporter, periplasmic molybdate-binding protein	SAOUHSC_02549	3921137	**>	17.7338	17.6538	17.5014	14.6366	14.3758	13.692	12.978	12.1652	12.357	17.6297	14.2348	12.5001	5.04993	+	0	4.26223	cluster1
NTNQDTNTTKDV	12	1349.61	Q2G105	yes	yes	2	2.2508e-07	162.31	1909400	0	702050	1207400	0	0	0	0	0	0		Q2G105	Uncharacterized protein	SAOUHSC_00356	3921829	**>	14.5077	19.4212	20.2035	14.1201	13.3276	12.2728	12.4819	14.0572	12.1705	18.0441	13.2402	12.9032	1.50465	+	0.00617632	4.97246	cluster1
LQQQGLTADKYKE	13	1520.78	Q2G2S6	yes	yes	3	0.00017873	124.12	981130	151660	119410	566740	90534	52787	0	0	0	0		Q2G2S6	Foldase protein PrsA (EC 5.2.1.8)	prsA SAOUHSC_01972	3920448	**>	17.2105	16.8656	19.1123	16.4662	15.6879	12.9794	13.5827	12.5179	11.5674	17.7295	15.0445	12.556	1.94349	+	0.00257235	3.9292	cluster1
LQSLDQRIA	9	1042.58	Q2FUW9	yes	yes	2	0.0035309	140.83	784300	150990	343430	289880	0	0	0	0	0	0		Q2FUW9	Surface protein F	sasF SAOUHSC_02982	3921464	**>	17.2041	18.3897	18.1451	13.3146	13.9334	12.8674	13.5053	11.9035	12.8077	17.9129	13.3718	12.7388	3.84017	+	0	4.85763	cluster1
TSKSSPLIFE	10	1107.58	Q2FY35	yes	yes	2	0.0038801	128.03	1585500	951120	121290	492100	0	0	0	20967	0	0		Q2FY35	Probable glycine dehydrogenase (decarboxylating) subunit 2 (EC 1.4.4.2) (Glycine cleavage system P-protein subunit 2) (Glycine decarboxylase subunit 2) (Glycine dehydrogenase (aminomethyl-transferring) subunit 2)	gcvPB SAOUHSC_01632	3919969	**>	19.8593	16.8881	18.9086	13.9804	13.0341	13.7644	14.3558	13.0388	12.7248	18.552	13.593	13.3731	2.834	+	0	5.06893	cluster1
KDVKQVLN	8	942.55	Q2FVX4	yes	yes	2	0.018658	146.81	1109600	156890	465000	360860	0	0	0	126880	0	0		Q2FVX4	Molybdenum ABC transporter, periplasmic molybdate-binding protein	SAOUHSC_02549	3921137	**>	17.2594	18.8269	18.4611	12.2296	14.1487	12.5714	16.9531	13.2812	13.7139	18.1824	12.9832	14.6494	2.01047	+	0.00225085	4.36613	cluster1
QNAAPVARQIYP	12	1326.7	Q2FVQ2	yes	yes	2	0.00043703	135.86	1031800	372530	438880	161580	40985	11699	0	0	0	6149.7		Q2FVQ2	Uncharacterized lipoprotein SAOUHSC_02650	SAOUHSC_02650	3921212	**>	18.507	18.7435	17.3019	15.3228	13.5141	13.0906	12.6485	13.7185	12.5863	18.1841	13.9758	12.9845	3.06279	+	0	4.70397	cluster1
ISLSGTGKELE	11	1132.6	Q2FXK6	yes	yes	2	9.8443e-08	172.17	1335600	986060	71142	259340	0	0	0	19037	0	0		Q2FXK6	30S ribosomal protein S4	rpsD SAOUHSC_01829	3921779	**>	19.9113	16.1184	17.9845	12.633	12.9329	12.8127	14.2165	12.5044	12.3994	18.0047	12.7929	13.0401	2.45176	+	0.001	5.08825	cluster1
VAPSSVDASIIG	12	1114.59	Q2G1Y5	yes	yes	2	0.010182	101.38	1300100	849620	164870	259740	0	0	0	25854	0	0		Q2G1Y5	L-lactate dehydrogenase 2 (L-LDH 2) (EC 1.1.1.27)	ldh2 SAOUHSC_02922	3921373	**>	19.6965	17.331	17.9867	13.1263	13.9497	12.2737	14.6581	13.1338	13.2203	18.338	13.1166	13.6707	2.92374	+	0	4.94439	cluster1
KSSAEVQQTQQASIPAS	17	1758.87	Q2G170	yes	yes	2	7.9211e-10	132.81	1805600	253510	169200	1268700	0	62718	51550	0	0	0		Q2G170	5'-nucleotidase, lipoprotein e(P4) family	SAOUHSC_00284	3918967	**>	17.9517	17.3684	20.2749	13.9611	15.9366	15.6537	13.4775	12.8496	13.4361	18.5317	15.1838	13.2544	2.5155	+	0.00065641	4.31258	cluster1
VIKSLIEQ	8	928.559	P0C7Y1	yes	yes	2	0.013979	162.88	1616400	1075600	231610	251640	57543	0	0	0	0	0		P0C7Y1	Phenol-soluble modulin alpha 1 peptide	psmA1 SAOUHSC_00411.4		**>	20.0367	17.8213	17.941	15.8124	13.0141	12.6915	12.5656	13.5608	13.8287	18.5997	13.8393	13.3184	2.36518	+	0.00143119	5.02083	cluster1
IISDIESKNN	10	1131.58	Q2FWX6	yes	yes	2	5.4505e-37	242.59	1684300	1232300	126010	245870	0	35338	29849	0	14960	0		Q2FWX6	Uncharacterized protein	SAOUHSC_02145	3921842	**>	20.2329	16.9432	17.9075	12.6364	15.1089	14.8654	13.1122	13.8688	12.2012	18.3612	14.2036	13.0608	2.17568	+	0.00215625	4.72905	cluster1
SSNATSKDESFT	12	1272.55	Q2FZ89	yes	yes	2	5.0072e-26	215.72	2335400	559980	83014	1623600	0	0	0	54830	13974	0		Q2FZ89	Cell division protein FtsZ	ftsZ SAOUHSC_01150	3920710	**>	19.095	16.3411	20.6308	13.2006	12.9105	13.7671	15.7427	13.7705	13.5408	18.6889	13.2927	14.3513	2.0559	+	0.00210526	4.86691	cluster1
IIDDNKGVTLAQA	13	1356.72	Q2FW22	yes	yes	2	1.1802e-20	187.11	1117800	938640	43357	135830	0	0	0	0	0	0		Q2FW22	50S ribosomal protein L18	rplR SAOUHSC_02495	3920872	**>	19.8402	15.404	17.0514	14.6107	13.8639	12.4931	11.2193	12.2185	12.4924	17.4319	13.6559	11.9767	1.96874	+	0.00251656	4.61557	cluster1
KGISFENSN	9	994.472	Q2G105	yes	yes	2	1.2975e-09	202.2	1028600	554840	234710	221890	0	0	9103.5	0	8081.9	0		Q2G105	Uncharacterized protein	SAOUHSC_00356	3921829	**>	19.0817	17.8405	17.7595	13.2512	15.1456	13.1522	12.3961	12.9805	12.9138	18.2272	13.8496	12.7635	3.44912	+	0	4.92068	cluster1
VINMQKASSVDDL	13	1418.71	Q2FXJ6	yes	yes	2	1.9243e-33	216.68	691760	281280	195030	149150	0	66296	0	0	0	0	23	Q2FXJ6	Uncharacterized protein	SAOUHSC_01838	3921788	**>	18.1016	17.5733	17.1864	13.4792	16.0166	11.7005	11.9155	11.3054	13.206	17.6205	13.7321	12.1423	2.11445	+	0.0021978	4.68326	cluster1
QGLTADKYKE	10	1151.58	Q2G2S6	yes	yes	3	0.034658	97.565	800540	248910	101240	394400	0	0	55979	0	0	0		Q2G2S6	Foldase protein PrsA (EC 5.2.1.8)	prsA SAOUHSC_01972	3920448	**>	17.9253	16.6274	18.5893	13.4103	13.5216	15.7726	12.3103	11.6831	12.6789	17.714	14.2348	12.2241	2.81082	+	0	4.48452	cluster1
YEAGATSDSKLA	12	1211.57	Q2FVX4	yes	yes	2	3.557e-07	158.42	1204000	302230	584410	306050	11288	0	0	0	0	0		Q2FVX4	Molybdenum ABC transporter, periplasmic molybdate-binding protein	SAOUHSC_02549	3921137	**>	18.2053	19.1566	18.2234	13.4625	14.2042	12.7098	12.0966	13.8247	13.0688	18.5284	13.4588	12.9967	3.80908	+	0	5.30067	cluster1
NSPYQGYASIHN	12	1349.6	Q2G170	yes	yes	2	6.9441e-06	153.75	1239300	731540	71855	435930	0	0	0	0	0	0		Q2G170	5'-nucleotidase, lipoprotein e(P4) family	SAOUHSC_00284	3918967	**>	19.4806	16.1328	18.7337	12.8583	13.7662	13.3301	13.2228	12.0172	12.4851	18.1157	13.3182	12.575	2.7737	+	0	5.1691	cluster1
SIGKVSFTDE	10	1081.53	Q2G0P0	yes	yes	2	0.011636	118.28	1094800	618750	77369	354190	0	32758	11710	0	0	0		Q2G0P0	50S ribosomal protein L1	rplA SAOUHSC_00519	3920373	**>	19.239	16.2395	18.4342	14.0671	14.9996	13.5155	11.6702	12.9193	12.491	17.9709	14.194	12.3602	2.75302	+	0	4.69377	cluster1
GADIARAEQYS	11	1179.55	Q2FW12	yes	yes	2	2.3534e-05	154.15	1954600	1102300	87114	765190	0	0	0	0	0	0		Q2FW12	30S ribosomal protein S3	rpsC SAOUHSC_02506	3920882	**>	20.0721	16.4106	19.5455	13.1734	13.611	13.5628	13.5225	11.4746	13.669	18.6761	13.449	12.8887	2.45393	+	0.000839024	5.50718	cluster1
VSNDTFTVDGV	11	1152.53	Q2FVV8	yes	yes	2	3.1968e-10	189.58	1257300	489430	265080	389380	59903	25960	13088	8085.3	6377.8	0		Q2FVV8	Transcriptional regulator, putative	SAOUHSC_02583	3921579	**>	18.9007	18.0161	18.5708	15.8703	14.664	13.676	12.9811	12.6388	12.261	18.4959	14.7368	12.627	3.78345	+	0	4.814	cluster1
VSKTATLGNQ	10	1017.55	Q2FZK7	yes	yes	2	6.8791e-28	237.84	1464000	739780	632700	91548	0	0	0	0	0	0		Q2FZK7	Bifunctional autolysin [Includes: N-acetylmuramoyl-L-alanine amidase (EC 3.5.1.28); Mannosyl-glycoprotein endo-beta-N-acetylglucosaminidase (EC 3.2.1.96)]	atl nag SAOUHSC_00994	3920394	**>	19.4967	19.2712	16.4822	12.7482	12.8334	12.0015	13.2921	12.6276	14.0273	18.4167	12.5277	13.3157	2.96204	+	0	5.49504	cluster1
MLETNKNHA	9	1056.5	Q2G1D8	yes	yes	2	0.00013132	180.45	1484100	449380	411840	445510	0	0	0	0	177350	0		Q2G1D8	Formate acetyltransferase (EC 2.3.1.54) (Pyruvate formate-lyase)	pflB SAOUHSC_00187	3919501	**>	18.7776	18.6517	18.7651	12.338	13.257	12.9295	11.5399	17.4362	12.9474	18.7315	12.8415	13.9745	1.81247	+	0.0032597	5.32344	cluster1
MYEDYKVVNTEVSD	14	1690.74	Q2FYC7	yes	yes	2	0.017114	91.961	3422900	683090	777000	1690100	0	81145	0	0	191530	0	31	Q2FYC7	Phage portal protein, HK97 family	SAOUHSC_01537	3920580	**>	19.3817	19.5676	20.6887	13.2564	16.3082	12.3702	13.9206	17.5472	13.3094	19.8793	13.9782	14.9257	1.80888	+	0.00325	5.42732	cluster1
GDKDSNYTSV	10	1084.47	Q2FVX4	yes	yes	2	0.0033107	133.23	1749900	229640	895100	557440	0	22864	30197	0	14634	0		Q2FVX4	Molybdenum ABC transporter, periplasmic molybdate-binding protein	SAOUHSC_02549	3921137	**>	17.809	19.7717	19.0885	12.6476	14.4808	14.8821	12.3527	13.837	12.6782	18.8897	14.0035	12.956	3.1197	+	0	5.40999	cluster1
LGEVKTVPAGKY	12	1260.71	Q2FVX4	yes	yes	2,3	0.0055308	107.17	1490200	769940	426140	294080	0	0	0	0	0	0		Q2FVX4	Molybdenum ABC transporter, periplasmic molybdate-binding protein	SAOUHSC_02549	3921137	**>	19.5544	18.701	18.1658	12.2286	13.9602	12.4213	13.0219	12.8497	13.2162	18.8071	12.87	13.0293	4.1988	+	0	5.85741	cluster1
IQSLKDDPSQSANVLG	16	1670.85	P02976	yes	yes	2	3.0451e-10	133.25	966480	417120	257940	291410	0	0	0	0	0	0		P02976	Immunoglobulin G-binding protein A (IgG-binding protein A) (Staphylococcal protein A) (SpA)	spa SAOUHSC_00069	3919448	**>	18.6701	17.9767	18.1527	13.1714	14.5182	13.5552	11.8665	11.8193	13.2302	18.2665	13.7482	12.3053	4.14874	+	0	5.2397	cluster1
TSVNTSSNATSKDESFT	17	1774.79	Q2FZ89	yes	yes	2	1.7914e-26	170.09	2297900	1138300	239530	858190	0	0	0	61881	0	0		Q2FZ89	Cell division protein FtsZ	ftsZ SAOUHSC_01150	3920710	**>	20.1185	17.8698	19.7109	12.8166	13.2225	13.6647	15.9172	13.1084	12.6669	19.2331	13.2346	13.8975	2.68776	+	0.000228571	5.66704	cluster1
IVVQASSNGKN	11	1115.59	Q2FWX0	yes	yes	2	2.0477e-15	211.64	1254200	528630	457130	268460	0	0	0	0	0	0		Q2FWX0	Uncharacterized protein	SAOUHSC_02151	3921848	**>	19.0119	18.8022	18.0343	12.0005	13.4046	12.5879	12.4794	12.6605	12.6435	18.6162	12.6643	12.5945	5.02795	+	0	5.98676	cluster1
KPAIKQVDPS	10	1081.61	Q2FXT7	yes	yes	2	3.1955e-05	160.36	2850300	1584100	271100	959700	0	0	0	35330	0	0		Q2FXT7	Preprotein translocase, YajC subunit	SAOUHSC_01747	3920546	**>	20.5952	18.0485	19.8722	13.091	13.9818	13.9264	15.1086	12.3057	12.9856	19.5053	13.6664	13.4667	2.94552	+	0	5.93878	cluster1
SLKDDPSQSANLLA	14	1457.74	P02976	yes	yes	2	0.03058	86.291	1383000	607000	581020	194990	0	0	0	0	0	0		P02976	Immunoglobulin G-binding protein A (IgG-binding protein A) (Staphylococcal protein A) (SpA)	spa SAOUHSC_00069	3919448	**>	19.2113	19.1482	17.573	13.6752	12.8008	12.7862	12.6459	12.3192	12.8231	18.6442	13.0874	12.5961	4.41119	+	0	5.80248	cluster1
NQDTNTTKDVIAL	13	1431.72	Q2G105	yes	yes	2	4.0438e-21	194.24	1241800	411580	369270	395740	20877	27788	16578	0	0	0		Q2G105	Uncharacterized protein	SAOUHSC_00356	3921829	**>	18.6508	18.4943	18.5942	14.3496	14.7622	14.017	12.904	11.1815	13.3336	18.5798	14.3763	12.473	3.98521	+	0	5.15513	cluster1
SKDSKTINV	9	990.535	Q2FVL2	yes	yes	2	0.0023524	147.4	2028400	256270	907590	836460	0	0	0	28069	0	0		Q2FVL2	Uncharacterized protein	SAOUHSC_02699	3919718	**>	17.9673	19.7917	19.6739	13.8981	12.8213	12.2481	14.7767	12.2875	12.2804	19.1443	12.9892	13.1149	3.0919	+	0	6.09229	cluster1
GALDKDPIKT	10	1056.58	Q2FXF4	yes	yes	2,3	0.0039024	127.83	1464100	290860	224950	880850	0	45644	21742	0	0	0		Q2FXF4	Uncharacterized protein	SAOUHSC_01895	3920842	**>	18.15	17.7792	19.7485	13.6972	15.4781	14.4082	13.0568	11.4946	12.6222	18.5592	14.5278	12.3912	3.29553	+	0	5.09971	cluster1
MVKNHNPKNEMQDMLTPLDAEEA	23	2654.21	Q2G185	yes	yes	3	0.044537	16.716	1706400	303020	365970	1037400	0	0	0	0	0	0		Q2G185	ESAT-6 secretion machinery protein EssB	essB SAOUHSC_00261	3919203	**>	18.2091	18.4814	19.9845	14.3305	14.38	14.3504	12.6391	12.247	12.9934	18.8917	14.3536	12.6265	4.46547	+	0	5.40159	cluster1
NNENNNQERQGLQ	13	1556.69	Q2FW66	yes	yes	2	1.0031e-53	251.24	1559800	721230	362420	476130	0	0	0	0	0	0		Q2FW66	Alkaline shock protein 23	asp23 SAOUHSC_02441	3919005	**>	19.4601	18.4673	18.861	13.5942	12.8428	13.1648	12.2436	13.0656	12.1906	18.9295	13.2006	12.5	5.33427	+	0	6.07918	cluster1
LNADQRNGFIQ	11	1274.64	P02976	yes	yes	2	4.7664e-06	159.94	1584600	344700	736040	503810	0	0	0	0	0	0		P02976	Immunoglobulin G-binding protein A (IgG-binding protein A) (Staphylococcal protein A) (SpA)	spa SAOUHSC_00069	3919448	**>	18.395	19.4894	18.9425	14.2622	13.45	13.1128	12.6475	12.3672	12.5015	18.9423	13.6083	12.5054	5.20202	+	0	5.88542	cluster1
SGAPVDVFM	9	921.427	Q2FVX4	yes	yes	2	0.0037811	139.88	1981900	655390	466000	860540	0	0	0	0	0	0	15	Q2FVX4	Molybdenum ABC transporter, periplasmic molybdate-binding protein	SAOUHSC_02549	3921137	**>	19.322	18.83	19.7149	12.0711	14.1044	13.6624	12.6108	13.3869	12.5376	19.2889	13.2793	12.8451	4.24068	+	0	6.22674	cluster1
KSSAEVQQTQQASIPASQKANLG	23	2370.21	Q2G170	yes	yes	3	0.0004441	111.45	2564800	875560	72031	1557300	0	59881	0	0	0	0		Q2G170	5'-nucleotidase, lipoprotein e(P4) family	SAOUHSC_00284	3918967	**>	19.7398	16.1363	20.5706	14.4873	15.8698	13.4264	12.8731	11.2679	12.8666	18.8156	14.5945	12.3359	2.12302	+	0.00224719	5.35041	cluster1
GLTADKYKE	9	1023.52	Q2G2S6	yes	yes	2	0.026208	114.84	3046400	1645900	84487	1279700	0	0	36267	0	0	0		Q2G2S6	Foldase protein PrsA (EC 5.2.1.8)	prsA SAOUHSC_01972	3920448	**>	20.6504	16.3664	20.2874	13.9948	13.6776	15.1464	12.1631	12.5808	12.9952	19.1014	14.2729	12.5797	2.40975	+	0.00104673	5.6751	cluster1
FVGGDSVKVG	10	963.503	Q2FXS8	yes	yes	2	0.00073256	150.61	2087000	1652400	102160	332420	0	0	0	0	0	0		Q2FXS8	50S ribosomal protein L21	rplU SAOUHSC_01757	3920555	**>	20.6561	16.6405	18.3426	13.5097	12.1895	13.7631	11.2439	12.3156	12.3552	18.5464	13.1541	11.9716	2.7291	+	0	5.98358	cluster1
VYAKDVKQV	9	1048.59	Q2FVX4	yes	yes	2	0.0030164	143.7	1535600	349880	150880	1034800	0	0	0	0	0	0		Q2FVX4	Molybdenum ABC transporter, periplasmic molybdate-binding protein	SAOUHSC_02549	3921137	**>	18.4165	17.203	19.9809	13.28	12.1336	12.9483	11.8282	11.4335	12.4058	18.5335	12.7873	11.8892	3.64699	+	0	6.19526	cluster1
LGEVKTVPAGKYA	13	1331.74	Q2FVX4	yes	yes	2,3	1.008e-09	155.86	6864600	309890	970140	5527500	0	22171	0	0	19919	15000		Q2FVX4	Molybdenum ABC transporter, periplasmic molybdate-binding protein	SAOUHSC_02549	3921137	**>	18.2414	19.8878	22.3982	13.2677	14.4364	12.8281	13.5325	14.2819	13.8727	20.1758	13.5107	13.8957	2.87093	+	0	6.4726	cluster1
KSSAEVQQTQQA	12	1303.64	Q2G170	yes	yes	2	1.5581e-45	254.18	7646500	410370	1849500	5176400	0	0	0	0	0	210140		Q2G170	5'-nucleotidase, lipoprotein e(P4) family	SAOUHSC_00284	3918967	**>	18.6466	20.8187	22.3035	13.4659	14.2615	13.7599	12.0248	12.8031	17.681	20.5896	13.8291	14.1696	1.91913	+	0.00260759	6.59022	cluster1
TAKINVNTENQIA	13	1414.74	Q2FWD3	yes	yes	2	1.5113e-06	145	2277600	1194300	362830	720520	0	0	0	0	0	0		Q2FWD3	Uncharacterized protein	SAOUHSC_02366	3919409	**>	20.1877	18.4689	19.4587	13.0007	12.9955	13.5894	11.6424	13.0645	12.9949	19.3718	13.1952	12.5673	4.39685	+	0	6.49055	cluster1
TSSNATSKDESFT	13	1373.59	Q2FZ89	yes	yes	2	1.0235e-42	235.31	2736100	803930	323840	1608300	0	0	0	0	0	0		Q2FZ89	Cell division protein FtsZ	ftsZ SAOUHSC_01150	3920710	**>	19.6167	18.3049	20.6171	13.9504	13.4855	14.448	12.9346	12.9323	12.2491	19.5129	13.9613	12.7053	4.12563	+	0	6.17961	cluster1
KSSAEVQQTQQASIPASQK	19	2015.03	Q2G170	yes	yes	3	3.7405e-12	140.35	3254500	651680	1484900	1117900	0	0	0	0	0	0		Q2G170	5'-nucleotidase, lipoprotein e(P4) family	SAOUHSC_00284	3918967	**>	19.3138	20.5019	20.0924	12.4989	13.8489	13.1384	14.1597	12.5961	12.5028	19.9694	13.162	13.0862	4.37738	+	0	6.84525	cluster1
LNDAAKKQIN	10	1113.61	Q2FXF4	yes	yes	2,3	8.1952e-20	222.28	2988900	932770	898280	1157900	0	0	0	0	0	0		Q2FXF4	Uncharacterized protein	SAOUHSC_01895	3920842	**>	19.8312	19.7768	20.1431	12.0586	13.5445	12.9055	12.0311	13.133	12.8031	19.917	12.8362	12.6557	5.27362	+	0	7.17105	cluster1
GDKDSNYTSVKDL	13	1440.67	Q2FVX4	yes	yes	2,3	7.8426e-34	222.74	5402900	513450	1093500	3796000	0	0	0	0	0	0		Q2FVX4	Molybdenum ABC transporter, periplasmic molybdate-binding protein	SAOUHSC_02549	3921137	**>	18.9699	20.0605	21.856	13.7568	13.2118	12.4133	12.9408	13.0452	12.287	20.2955	13.1273	12.7577	3.94805	+	0	7.353	cluster1
GEKNDIILE	9	1029.53	Q2G0N1	yes	yes	2	0.00031681	175.91	8143000	4670800	660190	2766000	0	0	0	45915	0	0		Q2G0N1	Elongation factor G (EF-G)	fusA SAOUHSC_00529	3920382	**>	22.1552	19.3325	21.3994	13.8528	14.1853	13.9567	15.4867	12.11	12.5334	20.9624	13.9983	13.3767	3.07489	+	0	7.2749	cluster1
LNYVEKGNAKQ	11	1262.66	Q2FVX4	yes	yes	2,3	3.5775e-06	162.26	4102500	907070	1066100	2129300	0	0	0	0	0	0		Q2FVX4	Molybdenum ABC transporter, periplasmic molybdate-binding protein	SAOUHSC_02549	3921137	**>	19.7909	20.0239	21.0219	12.7755	13.7936	12.0675	12.8073	12.3446	12.9159	20.2789	12.8789	12.6893	4.96437	+	0	7.49485	cluster1
SISANKDIT	9	947.492	Q2G188	yes	yes	2	0.0079853	133.13	2634200	787010	840530	1006700	0	0	0	0	0	0		Q2G188	ESAT-6 secretion accessory factor EsaA	esaA SAOUHSC_00258	3919200	**>	19.586	19.6809	19.9412	12.0768	14.5046	13.0195	11.8607	11.5267	12.6011	19.7361	13.2003	11.9962	4.40369	+	0	7.13782	cluster1
LGEVKTVPAG	10	969.549	Q2FVX4	yes	yes	2	0.0083303	121.5	6941600	2229500	1210000	3457900	0	44160	0	0	0	0		Q2FVX4	Molybdenum ABC transporter, periplasmic molybdate-binding protein	SAOUHSC_02549	3921137	**>	21.0883	20.2066	21.7215	13.9292	15.4305	12.9668	12.7059	13.0698	12.1471	21.0054	14.1088	12.641	4.2752	+	0	7.63056	cluster1
LIGDKDSNYT	10	1124.54	Q2FVX4	yes	yes	2	0.010198	119.68	6474600	1458900	1228300	3787300	0	0	0	0	0	0		Q2FVX4	Molybdenum ABC transporter, periplasmic molybdate-binding protein	SAOUHSC_02549	3921137	**>	20.4764	20.2282	21.8527	14.3717	12.9958	13.1089	12.8964	11.3979	13.051	20.8525	13.4922	12.4484	4.42419	+	0	7.88219	cluster1
IIDDNKGVTLA	11	1157.63	Q2FW22	yes	yes	2	0.0055428	117.09	16053000	12648000	701280	2698300	0	0	0	0	5004.6	0		Q2FW22	50S ribosomal protein L18	rplR SAOUHSC_02495	3920872	**>	23.5924	19.4196	21.3636	14.459	12.9538	12.7817	12.9466	12.289	12.5635	21.4586	13.3982	12.5997	3.48782	+	0	8.45962	cluster1
AVQGEKPQFVVN	12	1314.69	Q2FVW4	yes	yes	2	0.0033769	109.84	426370	196840	50414	170630	0	0	0	8489.5	0	0		Q2FVW4	Putative 2-hydroxyacid dehydrogenase SAOUHSC_02577 (EC 1.1.1.-)	SAOUHSC_02577	3921574	**>	17.5867	15.6215	17.3805	13.7486	15.1969	13.5548	13.0515	12.1683	12.7385	16.8629	14.1668	12.6528	2.58657	+	0.000340426	3.45315	cluster2
EGEQQTEEPEVVG	13	1429.62	Q2G0S0	yes	yes	2	0.0038668	104.59	387790	196160	41980	143080	0	0	0	6576.6	0	0		Q2G0S0	50S ribosomal protein L25 (General stress protein CTC)	rplY ctc SAOUHSC_00474	3920334	**>	17.5817	15.3574	17.1265	12.4533	14.2901	12.9593	12.6831	12.9905	13.1569	16.6885	13.2343	12.9435	2.45223	+	0.00100483	3.59962	cluster2
AVKGIGDSV	9	844.465	Q2G247	yes	yes	2	0.025128	115.7	175930	96817	0	41196	0	0	22102	0	15811	0		Q2G247	UPF0478 protein SAOUHSC_01855	SAOUHSC_01855	3920533	**>	16.563	14.3926	15.3302	13.0136	13.5895	14.4319	12.135	13.9486	12.7758	15.4286	13.6783	12.9532	1.39306	+	0.0097788	2.11284	cluster2
DLEEEDPKEIE	11	1344.59	Q2FZ37	yes	yes	2	0.0021325	131.83	243310	130900	40642	71764	0	0	0	0	0	0		Q2FZ37	Succinate--CoA ligase [ADP-forming] subunit beta (EC 6.2.1.5) (Succinyl-CoA synthetase subunit beta) (SCS-beta)	sucC SAOUHSC_01216	3919482	**>	16.9981	15.3107	16.131	13.9303	14.0827	13.4585	13.289	10.7596	12.6213	16.1466	13.8239	12.2233	2.24528	+	0.00170954	3.12299	cluster2
ALNNPVLKNV	10	1080.63	Q2G071	yes	yes	2	0.016325	113.71	355280	138440	56287	135870	24674	0	0	0	0	0		Q2G071	Uncharacterized protein	SAOUHSC_00749	3919511	**>	17.0789	15.7805	17.0519	14.5907	13.0766	13.3291	13.0172	12.2139	11.8557	16.6371	13.6655	12.3623	3.02817	+	0	3.62323	cluster2
EEMLRMMMMQMGQKPSQ	17	2084.9	Q2FYT7	yes	yes	2	0.03002	59.862	180300	0	52160	128140	0	0	0	0	0	0	36;37;38;39	Q2FYT7	UPF0154 protein SAOUHSC_01338	SAOUHSC_01338	3920202	**>	14.1747	15.6707	16.9674	12.8642	13.711	11.6449	13.4812	12.9073	11.7383	15.6042	12.74	12.7089	1.50346	+	0.00625126	2.87975	cluster2
AAKAKPVYGAKE	12	1231.69	Q2G170	yes	yes	3	0.013573	97.163	768870	661360	107500	0	0	0	0	0	0	0		Q2G170	5'-nucleotidase, lipoprotein e(P4) family	SAOUHSC_00284	3918967	**>	19.3351	16.714	14.8641	12.3202	12.9212	12.1735	12.7128	12.9224	11.5543	16.9711	12.4717	12.3965	1.98332	+	0.00232558	4.53697	cluster2
EILAYSQRPT	10	1176.61	Q2FZ94	yes	yes	2	0.017708	112.36	355310	30818	213220	111270	0	0	0	0	0	0		Q2FZ94	Penicillin-binding protein 1	SAOUHSC_01145	3920705	**>	14.9115	17.702	16.7637	12.4414	13.9229	13.7592	12.7428	13.0376	12.2733	16.4591	13.3745	12.6846	2.17047	+	0.00221538	3.42953	cluster2
AAKAKPVY	8	846.496	Q2G170	yes	yes	2	0.040667	130.77	624240	159720	464530	0	0	0	0	0	0	0		Q2G170	5'-nucleotidase, lipoprotein e(P4) family	SAOUHSC_00284	3918967	**>	17.2852	18.8254	14.1092	12.6108	12.993	13.3213	13.6173	13.4781	11.51	16.7399	12.975	12.8685	1.43073	+	0.00851799	3.81821	cluster2
ETIKSNDINQL	11	1273.65	Q2G188	yes	yes	2	1.416e-14	206.97	434670	151170	102760	164820	15918	0	0	0	0	0		Q2G188	ESAT-6 secretion accessory factor EsaA	esaA SAOUHSC_00258	3919200	**>	17.2058	16.6489	17.3305	13.9584	14.0432	13.1365	12.4103	11.902	12.1413	17.0618	13.7127	12.1512	4.90737	+	0	4.12983	cluster2
DFDPNSTYIQ	10	1198.51	Q2FYS9	yes	yes	2	0.004131	125.75	159480	119760	0	39713	0	0	0	0	0	0		Q2FYS9	Aconitate hydratase (Aconitase) (EC 4.2.1.3)	SAOUHSC_01347	3920053	**>	16.8698	14.1096	15.2773	13.587	12.9973	12.3763	12.2803	12.7967	12.4166	15.4189	12.9869	12.4978	1.84294	+	0.00304532	2.67655	cluster2
DNKLGGDDFD	10	1094.45	Q2FXZ2	yes	yes	2	0.0079238	121.9	220750	64421	77596	78729	0	0	0	0	0	0		Q2FXZ2	Chaperone protein DnaK (HSP70) (Heat shock 70 kDa protein) (Heat shock protein 70)	dnaK SAOUHSC_01683	3921795	**>	15.9752	16.2437	16.2646	14.1794	13.2007	12.2134	12.3527	12.9862	12.9494	16.1612	13.1978	12.7627	3.02207	+	0	3.1809	cluster2
DGADIEEMK	9	1006.43	Q2FXE8	yes	yes	2	4.0429e-06	190.02	542930	329320	55674	125400	0	0	0	32535	0	0		Q2FXE8	Transaldolase (EC 2.2.1.2)	SAOUHSC_01901	3920848	**>	18.3291	15.7647	16.9362	12.3001	12.6246	13.8497	14.9897	13.1518	12.2716	17.01	12.9248	13.471	1.954	+	0.00260586	3.8121	cluster2
ASIPASQKANLGNQNIM	17	1755.89	Q2G170	yes	yes	2	5.3009e-20	161.24	454910	82557	69629	302720	0	0	0	0	0	0	72	Q2G170	5'-nucleotidase, lipoprotein e(P4) family	SAOUHSC_00284	3918967	**>	16.3331	16.0874	18.2076	12.8606	12.6672	13.5649	11.6403	12.6709	11.5284	16.876	13.0309	11.9465	3.15298	+	0	4.38733	cluster2
AIMTREHGVNS	11	1213.59	Q2G188	yes	yes	2	0.01388	104.82	205130	144100	61030	0	0	0	0	0	0	0		Q2G188	ESAT-6 secretion accessory factor EsaA	esaA SAOUHSC_00258	3919200	**>	17.1367	15.8972	14.0001	14.5885	13.9167	12.6958	12.3275	12.4508	13.0426	15.678	13.7337	12.607	1.44541	+	0.00792157	2.5077	cluster2
AIFGGMALNNHN	12	1257.59	Q2FYF1	yes	yes	2	0.0078978	104.22	203610	90058	36381	77176	0	0	0	0	0	0	32	Q2FYF1	Elastin-binding protein EbpS	ebpS SAOUHSC_01501	3919044	**>	16.4586	15.1509	16.2359	13.3084	14.0748	13.0782	12.7869	13.2237	12.1713	15.9484	13.4871	12.7273	2.88692	+	0	2.84124	cluster2
DIKFNYGGSG	10	1056.49	Q2FVX4	yes	yes	2	5.0706e-05	155.11	293520	77859	40731	174930	0	0	0	0	0	0		Q2FVX4	Molybdenum ABC transporter, periplasmic molybdate-binding protein	SAOUHSC_02549	3921137	**>	16.2486	15.3138	17.4164	13.8258	13.5409	13.4458	13.7742	11.6129	12.9272	16.3263	13.6042	12.7714	2.20715	+	0.00193548	3.13848	cluster2
AIGKNLTGGFG	11	1033.56	Q2FYI0	yes	yes	2	0.021165	98.04	363630	203120	50479	110030	0	0	0	0	0	0		Q2FYI0	Penicillin-binding protein 2	SAOUHSC_01467	3919909	**>	17.632	15.6234	16.7475	13.8186	14.5431	13.3014	11.8946	11.9268	13.1736	16.6676	13.8877	12.3317	2.78572	+	0	3.55792	cluster2
ETIKSNDINQLTV	13	1473.77	Q2G188	yes	yes	2	0.00011965	128.08	144290	89248	23272	31769	0	0	0	0	0	0		Q2G188	ESAT-6 secretion accessory factor EsaA	esaA SAOUHSC_00258	3919200	**>	16.4455	14.5063	14.9553	12.5893	13.2162	12.8501	13.5162	12.9199	13.8803	15.3024	12.8852	13.4388	1.96695	+	0.00250825	2.14039	cluster2
AEPNSNTNVIDLA	13	1356.65	Q2FWZ0	yes	yes	2	0.0047089	102.97	107660	85955	21702	0	0	0	0	0	0	0		Q2FWZ0	Aspartyl/glutamyl-tRNA(Asn/Gln) amidotransferase subunit B (Asp/Glu-ADT subunit B) (EC 6.3.5.-)	gatB SAOUHSC_02116	3921188	**>	16.3913	14.4055	13.8309	12.9439	13.3386	12.6394	12.5211	11.9023	11.9743	14.8759	12.9739	12.1326	1.77372	+	0.00366279	2.32265	cluster2
DNKSEATNLTT	11	1192.56	Q2G067	yes	yes	2	0.00039678	145.28	412210	0	225890	169860	0	0	0	0	0	16470		Q2G067	Uncharacterized protein	SAOUHSC_00754	3919515	**>	14.171	17.7853	17.374	13.2239	12.1551	13.1596	12.725	11.9655	14.0076	16.4434	12.8462	12.8994	1.58983	+	0.00495789	3.57061	cluster2
ASAFAAIANGGTYN	14	1326.62	Q2FYI0	yes	yes	2	7.0569e-10	148.68	390570	181640	36754	119430	16380	36360	0	0	0	0		Q2FYI0	Penicillin-binding protein 2	SAOUHSC_01467	3919909	**>	17.4707	15.1656	16.8658	13.9996	15.1501	12.2843	12.7835	13.587	12.2896	16.5007	13.8113	12.8867	1.69964	+	0.00422161	3.1517	cluster2
DLSKYQGIDKN	11	1279.64	Q2FXF4	yes	yes	2	0.014862	103.91	99628	44122	18501	37006	0	0	0	0	0	0		Q2FXF4	Uncharacterized protein	SAOUHSC_01895	3920842	**>	15.4292	14.1753	15.1755	12.2158	13.1651	13.4528	12.874	13.373	11.4285	14.9267	12.9446	12.5585	1.66099	+	0.00466125	2.17513	cluster2
AADGPMPQTRE	11	1171.53	Q2G0N0	yes	yes	2	0.0044064	121.36	415310	101680	91332	92044	14809	47315	35949	0	0	32174		Q2G0N0	Elongation factor Tu (EF-Tu)	tuf SAOUHSC_00530	3920383	**>	16.6337	16.4788	16.49	13.8542	15.53	15.1337	11.7692	12.6428	14.9736	16.5342	14.8393	13.1285	1.62184	+	0.00482353	2.55027	cluster2
ASYSTSSNNVQVT	13	1356.62	Q2G2J2	yes	yes	2	9.531e-05	130.56	377430	29744	130180	102880	0	0	0	0	78189	36448		Q2G2J2	Staphylococcal secretory antigen ssaA2	ssaA2 SAOUHSC_02571	3921568	**>	14.8603	16.9901	16.6506	12.404	13.8636	12.4722	13.5476	16.2547	15.1536	16.167	12.9133	14.9853	1.48192	+	0.00684577	2.21775	cluster2
AQFDAVKVLN	10	1103.6	Q2FZG4	yes	yes	2	0.017942	112.13	645890	439220	74422	132240	0	0	0	0	0	0		Q2FZG4	Pyruvate dehydrogenase E1 component subunit alpha (EC 1.2.4.1)	pdhA SAOUHSC_01040	3919888	**>	18.7446	16.1834	17.0128	13.1665	13.4817	13.0653	11.7783	11.4486	12.453	17.3136	13.2378	11.8933	3.32661	+	0	4.74804	cluster2
AAIATVLAKNGD	12	1142.63	Q2G0N0	yes	yes	2	6.0934e-05	147.26	63049	42437	0	20612	0	0	0	0	0	0		Q2G0N0	Elongation factor Tu (EF-Tu)	tuf SAOUHSC_00530	3920383	**>	15.373	13.5834	14.3312	13.2751	13.617	12.9825	12.499	12.6993	12.6462	14.4292	13.2915	12.6148	1.71962	+	0.00414525	1.47604	cluster2
DAETTGGNTKVSVLQT	16	1619.8	Q2FXJ6	yes	yes	2	6.856e-26	169.37	268840	80505	65336	110940	0	0	0	0	12063	0		Q2FXJ6	Uncharacterized protein	SAOUHSC_01838	3921788	**>	16.2968	15.9956	16.7594	13.7199	12.3022	13.9179	11.9692	13.5583	12.5543	16.3506	13.3133	12.6939	2.75977	+	0	3.34697	cluster2
DAAINPGNSGGALV	14	1254.62	Q2FXJ6	yes	yes	2	0.027461	87.498	143140	27242	48828	67068	0	0	0	0	0	0		Q2FXJ6	Uncharacterized protein	SAOUHSC_01838	3921788	**>	14.7335	15.5754	16.0333	15.3412	13.3498	14.8971	12.9266	11.2211	12.0835	15.4474	14.5294	12.077	2.10716	+	0.00218182	2.14424	cluster2
AAIATVLAKN	10	970.581	Q2G0N0	yes	yes	2	0.00077719	150.35	289870	162910	21564	105390	0	0	0	0	0	0		Q2G0N0	Elongation factor Tu (EF-Tu)	tuf SAOUHSC_00530	3920383	**>	17.3137	14.3963	16.6854	12.9538	13.4732	12.4447	12.4583	12.6007	12.1244	16.1318	12.9572	12.3945	2.23103	+	0.00169547	3.45597	cluster2
DGTKSGSIELSDA	13	1278.59	Q2FW07	yes	yes	2	7.0714e-15	179.19	287320	150260	19035	118020	0	0	0	0	0	0		Q2FW07	50S ribosomal protein L4	rplD SAOUHSC_02511	3920887	**>	17.1971	14.2164	16.8487	12.9886	12.6961	13.2111	13.5305	13.1035	13.3523	16.0874	12.9653	13.3288	1.85683	+	0.0030184	2.94035	cluster2
DSGLAIEPAATMA	13	1245.59	Q2FZ37	yes	yes	2	2.1797e-06	140.78	143520	110820	16289	16412	0	0	0	0	0	0		Q2FZ37	Succinate--CoA ligase [ADP-forming] subunit beta (EC 6.2.1.5) (Succinyl-CoA synthetase subunit beta) (SCS-beta)	sucC SAOUHSC_01216	3919482	**>	16.7579	13.9916	14.0025	12.8416	13.4532	13.8185	12.439	12.0049	12.0653	14.9173	13.3711	12.1698	1.43322	+	0.00841646	2.14688	cluster2
DMKSSFENSVT	11	1243.54	Q2FYS9	yes	yes	2	0.0006084	140.24	633860	544580	37684	51601	0	0	0	0	0	0		Q2FYS9	Aconitate hydratase (Aconitase) (EC 4.2.1.3)	SAOUHSC_01347	3920053	**>	19.0548	15.2017	15.6551	13.6947	13.5678	12.9592	11.891	11.9347	12.1324	16.6372	13.4072	11.986	2.0163	+	0.00226621	3.94056	cluster2
AIGKNLTGGFGSE	13	1249.63	Q2FYI0	yes	yes	2	1.9243e-33	216.68	584930	460340	29114	95473	0	0	0	0	0	0		Q2FYI0	Penicillin-binding protein 2	SAOUHSC_01467	3919909	**>	18.8123	14.8294	16.5428	13.21	13.5194	13.07	12.3929	12.3813	12.1658	16.7282	13.2665	12.3133	2.09356	+	0.00215054	3.93829	cluster2
ENQDGQINQQV	11	1271.57	Q2FVI6	yes	yes	2	0.018466	100.55	111770	29971	25113	56691	0	0	0	0	0	0		Q2FVI6	Uncharacterized protein	SAOUHSC_02724	3921600	**>	14.8713	14.6161	15.7908	12.9077	12.8859	14.086	12.0749	12.6012	12.2863	15.0928	13.2932	12.3208	2.61222	+	0.000215054	2.28575	cluster2
ANNGVAQIKPTNSGLYT	17	1746.89	Q2FZK7	yes	yes	2	1.8096e-34	183.6	490180	224140	42847	223200	0	0	0	0	0	0		Q2FZK7	Bifunctional autolysin [Includes: N-acetylmuramoyl-L-alanine amidase (EC 3.5.1.28); Mannosyl-glycoprotein endo-beta-N-acetylglucosaminidase (EC 3.2.1.96)]	atl nag SAOUHSC_00994	3920394	**>	17.774	15.3869	17.768	12.5994	12.3981	12.2696	12.8001	13.4087	12.966	16.9763	12.4224	13.0583	3.00356	+	0	4.23597	cluster2
DMSSNAKLPV	10	1060.52	Q2G0E5	yes	yes	2	0.029557	101.97	170740	28481	43133	36092	23886	27333	0	0	11811	0		Q2G0E5	Uncharacterized protein	SAOUHSC_00661	3919951	**>	14.7977	15.3965	15.1394	14.5439	14.7384	12.8818	12.2161	13.5278	12.5736	15.1112	14.0547	12.7725	1.66379	+	0.00467391	1.6976	cluster2
DAAINPGNSGGALVDI	16	1482.73	Q2FXJ6	yes	yes	2	5.6146e-07	123.76	240700	91008	32790	76836	13161	26902	0	0	0	0		Q2FXJ6	Uncharacterized protein	SAOUHSC_01838	3921788	**>	16.4737	15.001	16.2295	13.684	14.7154	12.4945	12.8589	12.4969	13.2093	15.9014	13.6313	12.855	2.04026	+	0.00219444	2.65824	cluster2
DAKTPSKISL	10	1058.6	Q2G188	yes	yes	2	0.0015129	146.11	284430	79010	71648	133770	0	0	0	0	0	0		Q2G188	ESAT-6 secretion accessory factor EsaA	esaA SAOUHSC_00258	3919200	**>	16.2697	16.1286	17.0294	13.6433	13.4634	12.2694	11.6487	10.9426	13.1054	16.4759	13.1254	11.8989	2.91712	+	0	3.96381	cluster2
AIDETDIKPVA	11	1170.61	Q2FXQ6	yes	yes	2	0.0030756	126.71	373790	50913	71038	44797	122230	43966	29601	11244	0	0		Q2FXQ6	Trigger factor (TF) (EC 5.2.1.8) (PPIase)	tig SAOUHSC_01779	3919697	**>	15.6357	16.1163	15.4511	16.8992	15.4241	14.8534	13.4569	13.2674	13.2377	15.7344	15.7256	13.3207	2.25764	+	0.00162712	1.21128	cluster2
ATILDSKTGGLVA	13	1244.7	Q2FYI0	yes	yes	2	0.00064493	110.8	286700	80890	110410	95402	0	0	0	0	0	0		Q2FYI0	Penicillin-binding protein 2	SAOUHSC_01467	3919909	**>	16.3037	16.7525	16.5417	13.2536	12.6592	11.715	12.3194	12.7749	11.8987	16.5326	12.5426	12.331	3.96079	+	0	4.09583	cluster2
AYNPSGASGLFQ	12	1210.56	Q2FV52	yes	yes	2	0.00010394	142.08	295500	73488	176520	45488	0	0	0	0	0	0		Q2FV52	Probable transglycosylase IsaA (EC 3.2.-.-) (Immunodominant staphylococcal antigen A)	isaA SAOUHSC_02887	3921556	**>	16.1652	17.4295	15.4732	14.4256	13.2671	13.1632	12.846	11.3615	12.51	16.356	13.6186	12.2392	2.59524	+	0.000213904	3.42707	cluster2
ASEEGGTEIEEVA	13	1319.57	Q2FZ37	yes	yes	2	0.024556	90.653	123300	85586	18218	19496	0	0	0	0	0	0		Q2FZ37	Succinate--CoA ligase [ADP-forming] subunit beta (EC 6.2.1.5) (Succinyl-CoA synthetase subunit beta) (SCS-beta)	sucC SAOUHSC_01216	3919482	**>	16.3851	14.1531	14.2509	12.8681	13.0236	12.595	11.6922	12.7908	12.7957	14.9297	12.8289	12.4263	1.68852	+	0.00433058	2.30211	cluster2
DYTGQAMVTDPN	12	1310.54	Q2FVQ2	yes	yes	2	0.001532	121.56	353570	168690	67380	56151	13570	0	0	15760	20159	11852		Q2FVQ2	Uncharacterized lipoprotein SAOUHSC_02650	SAOUHSC_02650	3921212	**>	17.364	16.04	15.777	13.7281	13.2108	12.5484	13.944	14.2991	13.5328	16.3937	13.1624	13.9253	2.71146	+	0	2.84981	cluster2
ATQMLDSMQR	10	1179.54	Q2FXM9	yes	yes	2	0.023712	107.03	118890	74136	0	44752	0	0	0	0	0	0		Q2FXM9	Pyruvate kinase (PK) (EC 2.7.1.40)	pyk SAOUHSC_01806	3919276	**>	16.1779	13.5887	15.4497	12.9868	13.3855	12.155	11.5854	13.0996	11.4987	15.0721	12.8424	12.0612	1.61397	+	0.0048617	2.62026	cluster2
ANAGQNNDSTVEDAEFK	17	1808.78	Q2FXZ2	yes	yes	2	0.0018005	101.96	138540	42054	42950	53533	0	0	0	0	0	0		Q2FXZ2	Chaperone protein DnaK (HSP70) (Heat shock 70 kDa protein) (Heat shock protein 70)	dnaK SAOUHSC_01683	3921795	**>	15.36	15.3904	15.7081	12.8228	13.8362	13.3908	13.0039	12.3907	12.3395	15.4862	13.35	12.578	3.67316	+	0	2.52216	cluster2
AVNLYDYANQ	10	1169.54	Q2FXA0	yes	yes	2	0.0040257	126.71	184550	22509	20666	19346	42793	48901	13609	9259.5	0	7462.3		Q2FXA0	UPF0342 protein SAOUHSC_01977	SAOUHSC_01977	3920453	**>	14.4582	14.335	14.2397	15.3851	15.5776	13.7323	13.1767	12.2421	12.8654	14.3443	14.8983	12.7614	1.77681	+	0.00359184	0.514448	cluster2
YNIGGNFQ	8	911.414	Q2FVK3;Q2FVK2;Q2FXB0	yes	no	2	0.018182	147.34	422700	119610	107910	177920	0	0	0	17267	0	0		Q2FVK3	Gamma-hemolysin h-gamma-ii subunit, putative	SAOUHSC_02708	3919727	**>	16.868	16.7195	17.4409	13.4001	13.7384	13.0635	14.0757	12.4987	10.4036	17.0094	13.4007	12.326	2.32216	+	0.00156444	4.1461	cluster2
NDQPNMGGMPGMM	13	1378.51	Q2FWN4	yes	yes	2	0.0038304	105.17	171200	16988	13489	24129	44871	27145	25627	11667	7288.7	0	21	Q2FWN4	60 kDa chaperonin (GroEL protein) (Protein Cpn60)	groL groEL SAOUHSC_02254	3919674	**>	14.0522	13.7195	14.5585	15.4535	14.7284	14.6454	13.5101	12.8314	12.8812	14.1101	14.9424	13.0743	2.34768	+	0.0016	0.101722	cluster2
TVDNNKAKQAY	11	1250.63	Q2FW66	yes	yes	2	0.0068635	112.13	126480	41677	51269	33534	0	0	0	0	0	0		Q2FW66	Alkaline shock protein 23	asp23 SAOUHSC_02441	3919005	**>	15.347	15.6458	15.0333	12.9377	14.4316	13.2681	13.0562	13.633	12.8929	15.342	13.5458	13.194	2.25058	+	0.00172385	1.97211	cluster2
SNANSEVFELH	11	1245.56	P47768	yes	yes	2	0.0082394	110.08	77008	61581	0	15427	0	0	0	0	0	0		P47768	DNA-directed RNA polymerase subunit beta (RNAP subunit beta) (EC 2.7.7.6) (RNA polymerase subunit beta) (Transcriptase subunit beta)	rpoB SAOUHSC_00524	3920377	**>	15.9102	13.3507	13.9132	12.7445	12.5532	12.9878	11.8456	12.0355	12.4057	14.3914	12.7618	12.0956	1.49889	+	0.00632581	1.96264	cluster2
NKNLENEGKEDK	12	1416.68	Q2FZY9	yes	yes	3	0.0023228	111.63	161570	56914	40918	63741	0	0	0	0	0	0		Q2FZY9	UPF0337 protein SAOUHSC_00845	SAOUHSC_00845	3918957	**>	15.7965	15.3204	15.9599	13.5072	13.0607	13.5554	14.3643	12.5532	13.0599	15.6923	13.3744	13.3258	2.37458	+	0.00143779	2.3422	cluster2
SSDLKQTPLYQN	12	1392.69	Q2FY33	yes	yes	2	0.00068998	132.5	519140	158650	65355	121340	42636	47806	17242	34489	19146	12477		Q2FY33	Aminomethyltransferase (EC 2.1.2.10) (Glycine cleavage system T protein)	gcvT SAOUHSC_01634	3919971	**>	17.2755	15.996	16.8887	15.3798	15.5449	14.0736	15.0738	14.2248	13.607	16.7201	14.9994	14.3019	1.76116	+	0.004	2.06941	cluster2
TAKSPVNVN	9	928.498	Q2FZK7	yes	yes	2	6.9914e-07	133.13	348390	156810	146180	0	0	0	0	22134	0	23269		Q2FZK7	Bifunctional autolysin [Includes: N-acetylmuramoyl-L-alanine amidase (EC 3.5.1.28); Mannosyl-glycoprotein endo-beta-N-acetylglucosaminidase (EC 3.2.1.96)]	atl nag SAOUHSC_00994	3920394	**>	17.2587	17.1574	15.1043	13.7866	14.5318	13.7363	14.434	13.2453	14.5061	16.5068	14.0182	14.0618	1.73763	+	0.00406838	2.46676	cluster2
STDQNTLYSM	10	1158.49	Q2FXF4	yes	yes	2	0.0036193	130.41	344780	63488	82667	89319	36783	25893	0	26798	11858	7970.2		Q2FXF4	Uncharacterized protein	SAOUHSC_01895	3920842	**>	15.9542	16.335	16.4467	15.1668	14.6603	13.3704	14.7098	13.5336	12.9604	16.2453	14.3992	13.7346	1.79035	+	0.00353216	2.17842	cluster2
VQEQDQQLSNNFGLQ	15	1746.82	Q2G189	yes	yes	2	3.6235e-10	145.86	453720	102040	35416	155080	27901	83218	20975	19093	0	9999		Q2G189	ESAT-6 secretion system extracellular protein A (Ess extracellular protein A)	esxA SAOUHSC_00257	3919199	**>	16.6388	15.1121	17.2427	14.768	16.3446	14.3564	14.2208	13.7811	13.2876	16.3312	15.1563	13.7631	1.41544	+	0.00903529	1.87145	cluster2
MRGGGNMQQ	9	977.417	Q2G0T4	yes	yes	2	0.019533	101.43	332600	102370	48154	92643	0	33430	22209	0	0	33797		Q2G0T4	Nucleoid-associated protein SAOUHSC_00444	SAOUHSC_00444	24247503	**>	16.6434	15.5554	16.4994	14.5433	15.0289	14.4389	12.9409	12.9417	15.0446	16.2327	14.6703	13.6424	1.6883	+	0.00431868	2.07635	cluster2
VFNTISVEKM	10	1166.6	Q2G2U3	yes	yes	2	0.043549	94.363	91681	22582	23642	45457	0	0	0	0	0	0	83	Q2G2U3	Uncharacterized protein	SAOUHSC_00022	3919193	**>	14.4629	14.5291	15.4722	12.6357	13.0665	12.8757	11.9428	12.586	12.065	14.8214	12.8593	12.1979	3.29969	+	0	2.29277	cluster2
SLAQKNDQEAYELG	14	1564.74	Q2FZ94	yes	yes	2	0.013412	92.939	131820	53816	36164	41842	0	0	0	0	0	0		Q2FZ94	Penicillin-binding protein 1	SAOUHSC_01145	3920705	**>	15.7157	15.1423	15.3527	12.9025	13.7282	13.8322	12.1076	12.826	13.2327	15.4036	13.4876	12.7221	2.94219	+	0	2.2987	cluster2
TFKDEPGVTYV	11	1254.61	Q2FVN4	yes	yes	2	0.011953	106.62	222910	63032	20872	114060	0	19737	0	0	5212	0		Q2FVN4	Uncharacterized protein	SAOUHSC_02668	3921230	**>	15.9438	14.3493	16.7994	12.7343	14.2686	13.555	13.1495	12.3476	13.4063	15.6975	13.5193	12.9678	1.65462	+	0.00464865	2.45395	cluster2
YYSDGVTGIKAA	12	1243.61	Q2FYI0	yes	yes	2	0.0099158	101.71	175340	54140	46697	74501	0	0	0	0	0	0		Q2FYI0	Penicillin-binding protein 2	SAOUHSC_01467	3919909	**>	15.7244	15.511	16.185	13.4059	13.9419	12.8881	12.4283	13.3736	13.3865	15.8068	13.412	13.0628	3.07413	+	0	2.56944	cluster2
FAAIANGGTYN	11	1097.51	Q2FYI0	yes	yes	2	0.0023929	130.41	330030	88944	46269	102090	17722	33988	16406	24614	0	0		Q2FYI0	Penicillin-binding protein 2	SAOUHSC_01467	3919909	**>	16.4406	15.4978	16.6395	14.1133	15.0527	14.0019	14.5872	12.4188	13.3024	16.1926	14.3893	13.4362	1.83963	+	0.00303614	2.27989	cluster2
SSFGQSTTVTPVQML	15	1581.77	Q2FZ94	yes	yes	2	0.014656	92.65	205490	47824	32764	69238	22329	33333	0	0	0	0	42	Q2FZ94	Penicillin-binding protein 1	SAOUHSC_01145	3920705	**>	15.5454	14.9998	16.0793	14.4466	15.0247	14.0673	12.5384	12.197	13.5575	15.5415	14.5129	12.7643	2.49206	+	0.000864322	1.90295	cluster2
SLVLIGDKDS	10	1045.57	Q2FVX4	yes	yes	2	0.0020814	142.83	139640	75915	25108	32590	6022.8	0	0	0	0	0		Q2FVX4	Molybdenum ABC transporter, periplasmic molybdate-binding protein	SAOUHSC_02549	3921137	**>	16.2121	14.6159	14.9921	12.5562	14.5064	13.0384	11.3342	12.8806	13.2416	15.2734	13.367	12.4855	1.52011	+	0.00604557	2.34713	cluster2
KTSPEDAVKK	10	1101.6	Q2G105	yes	yes	3	0.0029014	136.96	133680	100870	13536	19277	0	0	0	0	0	0		Q2G105	Uncharacterized protein	SAOUHSC_00356	3921829	**>	16.6221	13.7245	14.2346	13.5405	13.2268	13.6843	12.0763	11.3409	12.7802	14.8604	13.4839	12.0658	1.42062	+	0.0087601	2.08557	cluster2
SKINDINDLVN	11	1243.64	Q9F0R1	yes	yes	2	0.0031702	126.19	189970	128170	0	22447	0	39359	0	0	0	0		Q9F0R1	HTH-type transcriptional regulator SarR (Staphylococcal accessory regulator R)	sarR SAOUHSC_02566	3921563	**>	16.9677	14.8763	14.4542	13.4764	15.2644	13.9446	12.6852	12.656	12.4392	15.4327	14.2285	12.5935	1.54182	+	0.00563683	2.02178	cluster2
NIGQNDQLENI	11	1256.6	Q2G1E9	yes	yes	2	0.0060231	115.29	171410	47405	38594	70688	0	0	0	0	14721	0		Q2G1E9	Maltodextrin-binding protein	SAOUHSC_00176	3919490	**>	15.5328	15.2361	16.1092	12.1774	13.3757	12.7749	13.1119	13.8456	13.1999	15.626	12.776	13.3858	3.05471	+	0	2.54511	cluster2
NETYLSSNSTNE	12	1357.56	Q2FWI7	yes	yes	2	2.9635e-07	160.18	253540	0	24935	31133	0	0	0	39783	93207	64482		Q2FWI7	Antitoxin MazE	mazE SAOUHSC_02304	3919175	**>	14.7899	14.6059	14.9262	13.3584	12.7478	13.089	15.2799	16.5082	15.9766	14.774	13.065	15.9215	3.38365	+	0	0.280683	cluster2
TGNNIAQGTFN	11	1135.53	Q2FZK7	yes	yes	2	0.0042631	121.9	315690	39994	120640	115590	0	0	0	17738	0	21732		Q2FZK7	Bifunctional autolysin [Includes: N-acetylmuramoyl-L-alanine amidase (EC 3.5.1.28); Mannosyl-glycoprotein endo-beta-N-acetylglucosaminidase (EC 3.2.1.96)]	atl nag SAOUHSC_00994	3920394	**>	15.2875	16.8803	16.8187	12.9424	14.7872	12.618	14.1146	13.1577	14.4075	16.3288	13.4492	13.8933	1.72631	+	0.00420397	2.65759	cluster2
SWEATIYNN	9	1096.48	Q2G170	yes	yes	2	0.0058455	136.57	209960	114350	33004	62609	0	0	0	0	0	0		Q2G170	5'-nucleotidase, lipoprotein e(P4) family	SAOUHSC_00284	3918967	**>	16.8031	15.0104	15.9341	13.2814	13.8215	13.1502	13.4749	12.8984	12.67	15.9158	13.4177	13.0144	2.66327	+	0.000220994	2.69978	cluster2
QYYGSGSPENVEKI	14	1569.73	Q2FYF1	yes	yes	2	1.3611e-09	143.25	252540	132580	16146	103810	0	0	0	0	0	0		Q2FYF1	Elastin-binding protein EbpS	ebpS SAOUHSC_01501	3919044	**>	17.0165	13.9789	16.6636	13.1188	13.4978	13.6651	13.8039	12.2413	12.878	15.8863	13.4272	12.9744	1.48727	+	0.00662344	2.68551	cluster2
VEILNEDETTQTA	13	1461.68	Q2FW33	yes	yes	2	8.7886e-05	131.32	130210	5503.8	0	0	34048	52035	38628	0	0	0		Q2FW33	50S ribosomal protein L17	rplQ SAOUHSC_02484	3920861	**>	12.4262	12.6017	14.008	15.0553	15.6672	15.2374	13.1757	11.6168	12.3975	13.012	15.3199	12.3967	2.30976	+	0.00153043	-0.846336	cluster2
QDTNTTKDVIAL	12	1317.68	Q2G105	yes	yes	2	0.0020315	115.29	240970	28271	69986	131960	10749	0	0	0	0	0		Q2G105	Uncharacterized protein	SAOUHSC_00356	3921829	**>	14.787	16.0948	17.0097	13.3919	13.4481	12.8382	12.4706	12.8918	13.6075	15.9639	13.2261	12.9899	2.30035	+	0.00151724	2.85584	cluster2
QLSNNFGLQ	9	1019.5	Q2G189	yes	yes	2	0.0079226	133.23	507910	94487	119820	109380	42934	46875	32958	46771	0	14681		Q2G189	ESAT-6 secretion system extracellular protein A (Ess extracellular protein A)	esxA SAOUHSC_00257	3919199	**>	16.5278	16.8705	16.739	15.3898	15.5165	15.0083	15.5133	11.8395	13.8417	16.7124	15.3049	13.7315	1.39405	+	0.00977262	2.19424	cluster2
LVQDYNSGNKFG	12	1340.64	Q2FZK7	yes	yes	2	0.0017769	118.48	115650	36668	78983	0	0	0	0	0	0	0		Q2FZK7	Bifunctional autolysin [Includes: N-acetylmuramoyl-L-alanine amidase (EC 3.5.1.28); Mannosyl-glycoprotein endo-beta-N-acetylglucosaminidase (EC 3.2.1.96)]	atl nag SAOUHSC_00994	3920394	**>	15.1622	16.2693	14.3621	13.3936	14.1755	13.2196	12.345	12.3495	12.1554	15.2645	13.5962	12.2833	2.46541	+	0.000855721	2.32476	cluster2
GEAIDETDIKPVA	13	1356.68	Q2FXQ6	yes	yes	2	0.00030356	118.87	401620	47600	36230	63225	129500	66831	46453	0	11784	0		Q2FXQ6	Trigger factor (TF) (EC 5.2.1.8) (PPIase)	tig SAOUHSC_01779	3919697	**>	15.5387	15.1449	15.9482	16.9826	16.0282	15.5035	13.1693	13.5245	12.8665	15.5439	16.1714	13.1868	2.99051	+	0	0.864806	cluster2
QYNLPDNAAKD	11	1247.58	Q2FYI0	yes	yes	2	0.013197	105.46	138460	0	52554	85908	0	0	0	0	0	0		Q2FYI0	Penicillin-binding protein 2	SAOUHSC_01467	3919909	**>	14.4285	15.6815	16.3905	12.7331	13.7165	12.9321	12.8701	12.8602	11.5875	15.5002	13.1272	12.4393	2.17144	+	0.00222394	2.71693	cluster2
SEQQTMSELK	10	1179.54	Q2FZD9	yes	yes	2	0.0030041	136.02	150860	82032	27844	0	40988	0	0	0	0	0		Q2FZD9	Phenylalanine--tRNA ligase alpha subunit (EC 6.1.1.20) (Phenylalanyl-tRNA synthetase alpha subunit) (PheRS)	pheS SAOUHSC_01092	3919253	**>	16.3239	14.7651	14.6918	15.3229	14.6178	12.4204	12.3932	11.9809	12.1374	15.2603	14.1204	12.1705	1.5554	+	0.00552577	2.11483	cluster2
QQKQMQGEEIAEED	14	1661.72	Q2FXA0	yes	yes	2	8.5968e-08	136.93	148410	87185	0	61223	0	0	0	0	0	0		Q2FXA0	UPF0342 protein SAOUHSC_01977	SAOUHSC_01977	3920453	**>	16.4118	14.122	15.9018	13.5821	13.7621	13.2753	11.9178	12.1625	12.9075	15.4785	13.5398	12.3293	2.16636	+	0.0022069	2.54397	cluster2
NYKSSKGPDLYV	12	1369.69	Q2G2G0	yes	yes	2	0.0014411	122.7	108170	58165	14449	35552	0	0	0	0	0	0		Q2G2G0	Uncharacterized protein	SAOUHSC_00717	3919344	**>	15.8279	13.8187	15.1176	14.5588	14.5907	14.0594	11.5487	11.8763	11.8265	14.9214	14.403	11.7505	2.78747	+	0	1.84465	cluster2
REGMTSDTYT	10	1159.48	Q2FYK2	yes	yes	2	0.039856	94.692	181480	0	0	0	0	0	0	62789	59459	59227		Q2FYK2	Uncharacterized protein	SAOUHSC_01438	3920219	**>	14.1112	13.0392	13.0205	12.7794	13.2851	12.0536	15.9382	15.8596	15.854	13.3903	12.706	15.8839	3.21844	+	0	-0.904667	cluster2
IANGGTYNNAH	11	1130.51	Q2FYI0	yes	yes	2	0.0079121	110.38	349680	81222	33141	155600	79722	0	0	0	0	0		Q2FYI0	Penicillin-binding protein 2	SAOUHSC_01467	3919909	**>	16.3096	15.0163	17.2475	16.2827	13.3571	13.8629	13.2096	13.1291	12.606	16.1911	14.5009	12.9816	1.44481	+	0.00792195	2.4499	cluster2
VSTSEGVITDKE	12	1263.62	Q2FW20	yes	yes	2	0.017812	95.273	123520	0	0	0	0	70297	53219	0	0	0		Q2FW20	30S ribosomal protein S8	rpsH SAOUHSC_02498	3920874	**>	14.1448	13.475	14.2013	14.1325	16.1012	15.6997	11.8111	12.301	12.1748	13.9404	15.3111	12.0956	2.52828	+	0.000659794	0.236987	cluster2
NSDTFRVNT	9	1052.49	Q2G188	yes	yes	2	0.0028466	144.65	509680	93127	97215	128330	92248	33985	27587	21256	15934	0		Q2G188	ESAT-6 secretion accessory factor EsaA	esaA SAOUHSC_00258	3919200	**>	16.5069	16.5689	16.9695	16.4932	15.0526	14.7517	14.3756	13.9598	11.9987	16.6818	15.4325	13.4447	1.85306	+	0.003	2.24317	cluster2
GGQAEGYDLEIG	12	1207.54	Q2FXQ6	yes	yes	2	0.0017	119.45	281710	178360	30540	72814	0	0	0	0	0	0		Q2FXQ6	Trigger factor (TF) (EC 5.2.1.8) (PPIase)	tig SAOUHSC_01779	3919697	**>	17.4444	14.8984	16.1519	12.2674	13.4253	13.7126	12.1253	14.0114	12.6323	16.1649	13.1351	12.923	1.84592	+	0.00305455	3.13588	cluster2
VNGQENLYRIA	11	1275.66	Q2FYF1	yes	yes	2	0.006676	112.83	259880	91298	31565	117480	0	19541	0	0	0	0		Q2FYF1	Elastin-binding protein EbpS	ebpS SAOUHSC_01501	3919044	**>	16.4783	14.946	16.8421	13.4725	14.2542	13.1522	12.6367	13.4303	12.4267	16.0888	13.6263	12.8312	2.41071	+	0.00105164	2.86004	cluster2
SQEENAPVILG	11	1155.58	Q2FWD3	yes	yes	2	0.0048536	119.68	303860	55860	42785	111750	27018	26903	28000	11541	0	0		Q2FWD3	Uncharacterized protein	SAOUHSC_02366	3919409	**>	15.7695	15.3848	16.7699	14.7216	14.7155	14.7731	13.4945	12.0256	12.6217	15.9748	14.7368	12.714	2.81604	+	0	2.2494	cluster2
SASQAAGYNFIH	12	1264.58	Q2G2J2	yes	yes	2	0.0016765	119.74	167500	57783	65911	34885	0	0	0	8920.1	0	0		Q2G2J2	Staphylococcal secretory antigen ssaA2	ssaA2 SAOUHSC_02571	3921568	**>	15.8184	16.0082	15.0903	12.9579	13.6209	13.1133	13.1228	12.209	11.7746	15.639	13.2307	12.3688	3.17079	+	0	2.83923	cluster2
TDIREPEADSPVQ	13	1455.68	Q2G0M5	yes	yes	2	0.0074495	97.69	198140	102540	17907	77693	0	0	0	0	0	0		Q2G0M5	Uncharacterized epimerase/dehydratase SAOUHSC_00535	SAOUHSC_00535	3920815	**>	16.6458	14.1282	16.2455	14.2956	13.2837	14.1725	12.0552	12.877	12.2246	15.6732	13.9173	12.3856	1.95802	+	0.0024918	2.52175	cluster2
SLNGVAQINAKNN	13	1341.7	Q2FZK7	yes	yes	2	0.020141	92.247	124920	32156	40161	52599	0	0	0	0	0	0		Q2FZK7	Bifunctional autolysin [Includes: N-acetylmuramoyl-L-alanine amidase (EC 3.5.1.28); Mannosyl-glycoprotein endo-beta-N-acetylglucosaminidase (EC 3.2.1.96)]	atl nag SAOUHSC_00994	3920394	**>	14.9728	15.2935	15.6827	13.2311	13.7948	11.5344	12.0623	11.3387	12.6633	15.3164	12.8534	12.0214	2.22469	+	0.00178689	2.87892	cluster2
SSLINDGVKV	10	1030.57	Q2G188	yes	yes	2	0.0082266	121.6	319970	232460	23648	63861	0	0	0	0	0	0		Q2G188	ESAT-6 secretion accessory factor EsaA	esaA SAOUHSC_00258	3919200	**>	17.8266	14.5294	15.9626	12.9586	13.3664	12.9013	12.6236	12.4522	13.2348	16.1062	13.0755	12.7702	1.94195	+	0.0025641	3.18341	cluster2
VKIQNQKQEQLA	12	1425.79	Q2FVL6	yes	yes	2	0.0074135	104.82	485060	129130	260030	54648	0	0	0	0	28411	12836		Q2FVL6	Uncharacterized protein	SAOUHSC_02695	3919714	**>	16.9785	17.9883	15.7379	13.875	14.4012	13.6324	12.2253	14.7942	13.6479	16.9016	13.9695	13.5558	1.8819	+	0.00291589	3.13891	cluster2
LGEVKTVPAGKYAKQ	15	1587.9	Q2FVX4	yes	yes	3	0.00035952	109.44	265340	167750	39695	0	39711	18188	0	0	0	0		Q2FVX4	Molybdenum ABC transporter, periplasmic molybdate-binding protein	SAOUHSC_02549	3921137	**>	17.356	15.2767	13.8331	15.2773	14.1507	13.2409	12.0868	12.1254	12.1642	15.4886	14.223	12.1255	1.46211	+	0.0073284	2.31437	cluster2
YGGPNMAVKSL	11	1135.57	Q2FVV8	yes	yes	2	7.2648e-08	175.15	354520	259860	17282	77373	0	0	0	0	0	0		Q2FVV8	Transcriptional regulator, putative	SAOUHSC_02583	3921579	**>	17.9874	14.077	16.2395	13.814	14.617	13.2293	12.2134	13.2471	12.7404	16.1013	13.8867	12.7337	1.39374	+	0.00980139	2.7911	cluster2
QPQNISIDKINQ	12	1396.73	Q2FZK7	yes	yes	2	0.0014709	122.33	145670	44604	31472	69598	0	0	0	0	0	0		Q2FZK7	Bifunctional autolysin [Includes: N-acetylmuramoyl-L-alanine amidase (EC 3.5.1.28); Mannosyl-glycoprotein endo-beta-N-acetylglucosaminidase (EC 3.2.1.96)]	atl nag SAOUHSC_00994	3920394	**>	15.4449	14.9418	16.0868	12.1234	14.2265	12.085	11.9717	11.8867	12.481	15.4911	12.8116	12.1131	2.31945	+	0.00155066	3.02877	cluster2
NFNIEDNKAT	10	1164.54	Q2G2U2	yes	yes	2	0.0062679	123.51	142690	33910	40399	68383	0	0	0	0	0	0		Q2G2U2	Uncharacterized protein	SAOUHSC_00023	3919194	**>	15.0494	15.302	16.0613	12.4766	13.4818	13.102	12.6223	12.5169	11.0464	15.4709	13.0201	12.0619	2.72102	+	0	2.92992	cluster2
SLFKDDNGGAN	11	1136.51	Q2FVI6	yes	yes	2	5.277e-07	168.22	415530	138340	51351	101660	82386	0	19652	0	13634	8509.7		Q2FVI6	Uncharacterized protein	SAOUHSC_02724	3921600	**>	17.0779	15.6481	16.6334	16.3301	13.3037	14.2624	12.3257	13.7349	13.0549	16.4531	14.6321	13.0385	1.6534	+	0.00463612	2.61783	cluster2
TNNPGNYLDL	10	1119.52	Q2FY21	yes	yes	2	0.003247	133.81	347390	117480	66060	67058	45322	43797	0	7675.7	0	0		Q2FY21	Penicillin-binding protein 3	SAOUHSC_01652	3920104	**>	16.8421	16.0115	16.0331	15.4679	15.4185	11.9563	12.9061	13.1117	12.5857	16.2956	14.2809	12.8678	1.45187	+	0.00761671	2.72118	cluster2
GGPASGSAAIYT	12	1050.5	O05204	yes	yes	2	0.0062343	106.29	186660	125620	19096	41935	0	0	0	0	0	0		O05204	Alkyl hydroperoxide reductase subunit F (EC 1.8.1.-)	ahpF SAOUHSC_00364	3919783	**>	16.9387	14.221	15.3559	13.8407	13.2406	12.9548	12.0736	12.0399	12.0912	15.5052	13.3454	12.0682	2.19175	+	0.001984	2.79839	cluster2
KSSLENSMKKS	11	1237.63	Q2G2P5	yes	yes	3	0.0030756	126.71	159560	112320	47242	0	0	0	0	0	0	0		Q2G2P5	Uncharacterized protein	SAOUHSC_00201	3920357	**>	16.7773	15.5278	15.6176	13.114	13.6721	12.7942	12.1402	12.5129	12.8276	15.9742	13.1935	12.4936	3.40896	+	0	3.13071	cluster2
VGALDKDPIKT	11	1155.65	Q2FXF4	yes	yes	3	0.035528	91.658	333090	79020	78155	175910	0	0	0	0	0	0		Q2FXF4	Uncharacterized protein	SAOUHSC_01895	3920842	**>	16.2699	16.2541	17.4245	13.3855	13.8066	12.9134	13.2086	12.743	13.5041	16.6495	13.3685	13.1519	3.56681	+	0	3.38929	cluster2
TAKYDGIKS	9	981.513	Q2G028	yes	yes	2	0.012597	125.74	411940	281600	25258	105090	0	0	0	0	0	0		Q2G028	Enolase (EC 4.2.1.11) (2-phospho-D-glycerate hydro-lyase) (2-phosphoglycerate dehydratase)	eno SAOUHSC_00799	3919362	**>	18.1033	14.6245	16.6813	14.396	13.8578	12.5081	13.5142	12.0829	13.3088	16.4697	13.5873	12.9686	1.54563	+	0.00556923	3.19169	cluster2
PNANGKYSIVTV	12	1261.67	Q2FVQ2	yes	yes	2	0.0022984	111.94	195490	0	0	0	0	0	0	67453	92026	36011		Q2FVQ2	Uncharacterized lipoprotein SAOUHSC_02650	SAOUHSC_02650	3921212	**>	13.3673	13.4293	14.2268	12.6939	12.3854	12.0674	16.0416	16.4898	15.1362	13.6745	12.3822	15.8892	3.31611	+	0	-0.461226	cluster2
FAVSKTATLG	10	993.549	Q2FZK7	yes	yes	2	0.036351	96.342	281530	0	101600	179930	0	0	0	0	0	0		Q2FZK7	Bifunctional autolysin [Includes: N-acetylmuramoyl-L-alanine amidase (EC 3.5.1.28); Mannosyl-glycoprotein endo-beta-N-acetylglucosaminidase (EC 3.2.1.96)]	atl nag SAOUHSC_00994	3920394	**>	14.4272	16.6325	17.4571	14.2923	14.4919	13.2655	12.6541	13.187	12.154	16.1723	14.0166	12.6651	1.79846	+	0.00338643	2.83144	cluster2
SQVFQEIN	8	963.466	Q2FXA0	yes	yes	2	0.023481	141.48	339710	188480	59276	76778	15176	0	0	0	0	0		Q2FXA0	UPF0342 protein SAOUHSC_01977	SAOUHSC_01977	3920453	**>	17.5241	15.8552	16.2284	13.8895	13.6298	13.5052	12.6849	13.413	12.9771	16.5359	13.6748	13.025	3.25226	+	0	3.18596	cluster2
KRTDQSDDESPEH	13	1542.65	Q2FXZ9	yes	yes	3	7.994e-07	149.49	432850	79373	71409	196640	0	0	0	85426	0	0		Q2FXZ9	UPF0365 protein SAOUHSC_01676	SAOUHSC_01676	3920087	**>	16.2764	16.1238	17.5852	12.2743	13.508	13.668	16.3824	13.5157	12.7829	16.6618	13.1501	14.227	1.43307	+	0.00839614	2.97324	cluster2
LGGSASEFSPTQL	13	1292.62	Q2FYI0	yes	yes	2	1.8549e-06	142.83	401660	81459	27364	133790	63431	84572	11042	0	0	0		Q2FYI0	Penicillin-binding protein 2	SAOUHSC_01467	3919909	**>	16.3138	14.74	17.0296	15.9529	16.3679	13.4307	12.8718	12.7354	11.8487	16.0278	15.2505	12.4853	1.62171	+	0.00481067	2.15991	cluster2
VVAPTEEPTEEE	12	1328.6	Q2G0S0	yes	yes	2	0.036584	88.596	212130	0	45164	138230	28738	0	0	0	0	0		Q2G0S0	50S ribosomal protein L25 (General stress protein CTC)	rplY ctc SAOUHSC_00474	3920334	**>	14.7668	15.4629	17.0767	14.8107	14.9396	13.9706	11.5427	12.72	12.412	15.7688	14.5736	12.2249	2.27866	+	0.00150427	2.36953	cluster2
LKDDPSQSANLLA	13	1370.7	P02976	yes	yes	2	0.027862	89.46	230770	111670	71442	47666	0	0	0	0	0	0		P02976	Immunoglobulin G-binding protein A (IgG-binding protein A) (Staphylococcal protein A) (SpA)	spa SAOUHSC_00069	3919448	**>	16.7689	16.1245	15.5407	14.0337	12.9717	13.3853	12.4173	12.8872	12.4817	16.1447	13.4636	12.5954	3.53607	+	0	3.11518	cluster2
IQSLKDDPSQSTNVLG	16	1700.86	P02976	yes	yes	2	0.00079218	106.82	245080	137360	49738	57986	0	0	0	0	0	0		P02976	Immunoglobulin G-binding protein A (IgG-binding protein A) (Staphylococcal protein A) (SpA)	spa SAOUHSC_00069	3919448	**>	17.0676	15.6021	15.8234	14.3547	13.3386	13.1906	12.4693	13.2535	12.0376	16.1644	13.628	12.5868	2.74563	+	0	3.05698	cluster2
YANQLEQA	8	935.435	Q2FXA0	yes	yes	2	0.036644	133.12	292560	150240	84175	58142	0	0	0	0	0	0		Q2FXA0	UPF0342 protein SAOUHSC_01977	SAOUHSC_01977	3920453	**>	17.1969	16.3611	15.8273	14.3237	14.7823	12.7007	13.6981	12.9115	12.0419	16.4618	13.9356	12.8838	2.1729	+	0.00223256	3.05207	cluster2
MWVDGDKQMA	10	1179.51	Q2G1E9	yes	yes	2	0.0341	98.048	227580	128450	69540	29592	0	0	0	0	0	0		Q2G1E9	Maltodextrin-binding protein	SAOUHSC_00176	3919490	**>	16.9708	16.0856	14.8529	12.0254	13.4475	13.0004	11.8695	12.5687	12.7269	15.9698	12.8244	12.3884	2.55941	+	0.000505263	3.36338	cluster2
VNGQENLYRI	10	1204.62	Q2FYF1	yes	yes	2	0.0082266	121.6	298370	110040	54105	121360	12868	0	0	0	0	0		Q2FYF1	Elastin-binding protein EbpS	ebpS SAOUHSC_01501	3919044	**>	16.7477	15.7235	16.8889	13.6515	12.6461	12.8739	12.491	13.3609	12.7244	16.4534	13.0572	12.8588	3.51398	+	0	3.4954	cluster2
NAGNDAPKKFA	11	1131.57	Q2FYI0	yes	yes	2	0.0063852	113.93	409250	107420	49883	251950	0	0	0	0	0	0		Q2FYI0	Penicillin-binding protein 2	SAOUHSC_01467	3919909	**>	16.7129	15.6063	17.9428	12.3262	14.1747	12.8114	13.2274	13.3485	13.2408	16.754	13.1041	13.2722	2.45153	+	0.000995215	3.56581	cluster2
KGEPQPEVDKPKN	13	1464.76	Q2FZW3	yes	yes	3	0.00025593	120.87	373180	211850	161330	0	0	0	0	0	0	0		Q2FZW3	Protein DltD	dltD SAOUHSC_00872	3919219	**>	17.6927	17.2997	13.9297	13.7174	12.9806	13.7799	12.6985	13.0941	12.0869	16.3073	13.4926	12.6265	1.57404	+	0.00530548	3.24777	cluster2
QIKPTNSGLYT	11	1220.64	Q2FZK7	yes	yes	2	0.006676	112.83	489620	77094	125170	237540	0	0	0	49820	0	0		Q2FZK7	Bifunctional autolysin [Includes: N-acetylmuramoyl-L-alanine amidase (EC 3.5.1.28); Mannosyl-glycoprotein endo-beta-N-acetylglucosaminidase (EC 3.2.1.96)]	atl nag SAOUHSC_00994	3920394	**>	16.2343	16.9335	17.8578	12.3787	14.1144	13.4301	15.6044	12.9021	13.0848	17.0086	13.3077	13.8638	1.87651	+	0.00300621	3.42281	cluster2
NAKSPVNVM	9	958.491	Q2FZK7	yes	yes	2	0.030468	111.46	262790	71882	52754	120860	0	0	0	17302	0	0		Q2FZK7	Bifunctional autolysin [Includes: N-acetylmuramoyl-L-alanine amidase (EC 3.5.1.28); Mannosyl-glycoprotein endo-beta-N-acetylglucosaminidase (EC 3.2.1.96)]	atl nag SAOUHSC_00994	3920394	**>	16.1333	15.687	16.883	13.6194	13.6463	12.4114	14.0787	11.1827	12.3273	16.2344	13.2257	12.5295	2.06793	+	0.00212766	3.35682	cluster2
VTVVAPTEEPTEEE	14	1528.71	Q2G0S0	yes	yes	2	1.7887e-19	171.05	461540	15811	73547	340430	0	18205	13551	0	0	0		Q2G0S0	50S ribosomal protein L25 (General stress protein CTC)	rplY ctc SAOUHSC_00474	3920334	**>	13.9486	16.1664	18.377	13.2667	14.152	13.7261	13.0625	12.0174	12.2772	16.164	13.7149	12.4524	1.42285	+	0.00880191	3.08034	cluster2
VLIGDKDSNYT	11	1223.6	Q2FVX4	yes	yes	2	0.0068635	112.13	349880	83758	107940	158180	0	0	0	0	0	0		Q2FVX4	Molybdenum ABC transporter, periplasmic molybdate-binding protein	SAOUHSC_02549	3921137	**>	16.3539	16.7199	17.2712	12.8178	13.3297	13.5115	12.6578	13.6631	12.8803	16.7817	13.2196	13.067	4.04673	+	0	3.63833	cluster2
SAIIEAKKQLVD	12	1313.76	Q2G0N9	yes	yes	2	0.013573	97.163	537780	116760	37104	109250	0	241580	33074	0	0	0		Q2G0N9	50S ribosomal protein L10	rplJ SAOUHSC_00520	3920374	**>	16.8332	15.1793	16.7373	14.1698	17.8821	15.0134	13.2133	12.7616	11.6061	16.2499	15.6885	12.527	1.54155	+	0.00562245	2.14219	cluster2
NKDTQQQNQPEEDERQ	16	1985.87	Q2FV29	yes	yes	3	2.8673e-05	110.97	210680	37271	40781	132630	0	0	0	0	0	0		Q2FV29	Uncharacterized protein	SAOUHSC_02910	3921362	**>	15.1858	15.3156	17.017	13.121	15.2343	12.1859	11.2153	13.0698	11.9154	15.8395	13.5137	12.0668	1.62944	+	0.00483646	3.0492	cluster2
SDVNNTDNYG	10	1097.43	Q2G274	yes	yes	2	0.0041066	125.97	472180	277660	28059	157280	0	0	0	9182.6	0	0		Q2G274	DNA gyrase subunit B (EC 5.99.1.3)	gyrB SAOUHSC_00005	3919178	**>	18.083	14.7762	17.263	13.2165	13.8298	12.8308	13.1647	12.3664	13.2727	16.7074	13.2923	12.9346	2.0318	+	0.00218685	3.59391	cluster2
STINTIKYD	9	1053.53	Q2FVF5	yes	yes	2	0.011018	128.27	372420	220090	48661	88720	14947	0	0	0	0	0		Q2FVF5	Uncharacterized protein	SAOUHSC_02759	3921631	**>	17.7477	15.5705	16.437	13.8676	13.5666	12.3502	12.7019	13.0883	12.64	16.5851	13.2615	12.8101	2.65771	+	0.00021978	3.54929	cluster2
NDAKQQIAEQIQ	12	1384.69	Q2G2F0	yes	yes	2	0.00014147	139.78	255620	127560	42146	85914	0	0	0	0	0	0		Q2G2F0	Uncharacterized protein	SAOUHSC_01968	3920445	**>	16.9608	15.3631	16.3906	14.5461	14.3045	12.8093	12.1091	12.7628	12.3323	16.2382	13.8866	12.4014	2.67638	+	0.000224719	3.09416	cluster2
MEGEQQTEEPEVVG	14	1560.66	Q2G0S0	yes	yes	2	1.1417e-05	119.88	331740	124020	25939	161660	9904.1	10208	0	0	0	0		Q2G0S0	50S ribosomal protein L25 (General stress protein CTC)	rplY ctc SAOUHSC_00474	3920334	**>	16.9202	14.6628	17.3026	13.2738	13.3174	13.1607	12.0281	13.0202	12.0714	16.2952	13.2506	12.3733	2.41752	+	0.00106161	3.48326	cluster2
QQVVKDAFLS	10	1133.61	Q2FYI0	yes	yes	2	0.036351	96.342	254790	81667	86439	86685	0	0	0	0	0	0		Q2FYI0	Penicillin-binding protein 2	SAOUHSC_01467	3919909	**>	16.3175	16.3994	16.4035	13.3915	14.3467	12.9297	11.8507	11.9126	13.5043	16.3735	13.556	12.4225	2.98006	+	0	3.38421	cluster2
NSNGEWAYKV	10	1166.54	Q2G105	yes	yes	2	0.0079942	121.83	295990	156020	51470	88494	0	0	0	0	0	0		Q2G105	Uncharacterized protein	SAOUHSC_00356	3921829	**>	17.2514	15.6514	16.4333	13.4194	13.9239	12.3014	13.5721	11.9424	11.943	16.4454	13.2149	12.4858	2.53829	+	0.000663212	3.59501	cluster2
IYDTDAKSDVNQTPVG	16	1721.81	Q2G2P5	yes	yes	2	0.0006074	107.82	323210	205140	35269	82804	0	0	0	0	0	0		Q2G2P5	Uncharacterized protein	SAOUHSC_00201	3920357	**>	17.6462	15.1061	16.3374	12.5041	14.8972	14.1964	12.966	12.0652	12.1343	16.3633	13.8659	12.3885	1.98378	+	0.00233333	3.23605	cluster2
QQASIPASQKANLG	14	1411.74	Q2G170	yes	yes	2	0.0073846	95.273	256610	49676	86543	120390	0	0	0	0	0	0		Q2G170	5'-nucleotidase, lipoprotein e(P4) family	SAOUHSC_00284	3918967	**>	15.6003	16.4011	16.8774	13.0425	14.6595	13.4307	12.9154	12.3705	11.5474	16.2929	13.7109	12.2778	2.82553	+	0	3.29858	cluster2
TTPSKLTQEQGDYATTV	17	1838.89	Q2FVZ5	yes	yes	2	2.6967e-06	117.2	399010	112630	56334	165420	0	49479	0	0	15142	0		Q2FVZ5	Uncharacterized protein	SAOUHSC_02525	3921116	**>	16.7812	15.7817	17.3358	14.2365	15.5945	13.7757	11.7658	13.8863	12.2009	16.6329	14.5356	12.6176	2.18996	+	0.0019761	3.05629	cluster2
QLPNFQTALN	10	1144.59	Q2FVQ2	yes	yes	2	0.0341	98.048	728840	465470	59935	95538	36726	46796	17555	6824.1	0	0		Q2FVQ2	Uncharacterized lipoprotein SAOUHSC_02650	SAOUHSC_02650	3921212	**>	18.8283	15.8711	16.5438	15.1645	15.5141	14.0996	12.7364	13.4354	12.9966	17.0811	14.9261	13.0561	2.08743	+	0.00214286	3.08998	cluster2
NFDGGIGSPINN	12	1203.55	Q2FWX2	yes	yes	2	3.5965e-07	158.3	314260	106140	84010	124110	0	0	0	0	0	0		Q2FWX2	Uncharacterized protein	SAOUHSC_02149	3921846	**>	16.6956	16.3583	16.9213	13.8402	14.2281	12.9633	12.8892	12.4029	12.264	16.6584	13.6772	12.5187	4.11374	+	0	3.56044	cluster2
SPSEVVKEGDEVE	13	1402.65	Q2FYF9	yes	yes	2	3.9107e-05	136.3	368520	170040	53837	118330	0	26315	0	0	0	0		Q2FYF9	30S ribosomal protein S1, putative	SAOUHSC_01493	3920248	**>	17.3755	15.7163	16.8525	13.4253	14.6836	12.9755	13.894	11.3519	12.1871	16.6481	13.6948	12.4776	2.18161	+	0.00217323	3.56188	cluster2
FIQSLKDDPSQ	11	1276.63	P02976	yes	no	2	0.00053097	142.08	298900	84929	74847	139120	0	0	0	0	0	0		P02976	Immunoglobulin G-binding protein A (IgG-binding protein A) (Staphylococcal protein A) (SpA)	spa SAOUHSC_00069	3919448	**>	16.374	16.1917	17.086	13.5113	13.6343	12.6181	11.9461	12.7628	12.3306	16.5505	13.2546	12.3465	4.02946	+	0	3.75	cluster2
TDNKKTVATSDNKDTQQQNQPEEDE	25	2862.28	Q2FV29	yes	yes	3	0.034706	80.412	366390	0	109050	257340	0	0	0	0	0	0		Q2FV29	Uncharacterized protein	SAOUHSC_02910	3921362	**>	13.5426	16.7346	17.9733	12.5058	14.0568	14.032	12.3025	12.4229	10.8695	16.0835	13.5315	11.865	1.43262	+	0.00846265	3.38527	cluster2
QTQQASIPASQKANLGNQ	18	1882.95	Q2G170	yes	yes	3	0.0048384	96.489	293620	110010	40127	143490	0	0	0	0	0	0		Q2G170	5'-nucleotidase, lipoprotein e(P4) family	SAOUHSC_00284	3918967	**>	16.7473	15.2923	17.1306	13.7412	12.7562	12.5243	11.2903	12.5444	12.6417	16.3901	13.0072	12.1588	2.83421	+	0	3.80702	cluster2
TGGFGSEGASTLTQQ	15	1439.65	Q2FYI0	yes	yes	2	1.8462e-10	150.11	213540	39493	58773	103230	12042	0	0	0	0	0		Q2FYI0	Penicillin-binding protein 2	SAOUHSC_01467	3919909	**>	15.2693	15.8429	16.6555	13.5558	13.6933	12.5962	11.9733	11.4108	11.6532	15.9226	13.2818	11.6791	3.60743	+	0	3.44213	cluster2
SANTKDVDAL	10	1032.51	Q2FVX4	yes	yes	2	0.028913	102.53	342170	49929	117520	174720	0	0	0	0	0	0		Q2FVX4	Molybdenum ABC transporter, periplasmic molybdate-binding protein	SAOUHSC_02549	3921137	**>	15.6076	16.8425	17.4147	12.5257	14.3927	13.6429	12.2748	12.1589	12.6307	16.6216	13.5204	12.3548	2.88052	+	0	3.68399	cluster2
MNKTDLINAVAE	12	1317.66	Q2FYG2	yes	yes	2	0.0029472	110.38	359360	255760	90274	0	0	13327	0	0	0	0		Q2FYG2	DNA-binding protein HU, putative	SAOUHSC_01490	14478799	**>	17.9644	16.462	14.6425	12.6962	13.7021	14.2032	11.6073	11.688	12.8577	16.3563	13.5338	12.051	2.02493	+	0.00217931	3.5639	cluster2
YVAPYYGQNAAPVARQ	16	1766.87	Q2FVQ2	yes	yes	2	1.7545e-63	227.06	905790	745410	30389	98790	0	31207	0	0	0	0		Q2FVQ2	Uncharacterized lipoprotein SAOUHSC_02650	SAOUHSC_02650	3921212	**>	19.5077	14.8913	16.5921	13.6207	14.9296	13.9146	13.333	11.1854	13.515	16.997	14.155	12.6778	1.38809	+	0.0099954	3.58061	cluster2
GGSASEFSPTQL	12	1179.54	Q2FYI0	yes	yes	2	0.011262	100.04	418320	51875	83870	222140	14723	31061	14651	0	0	0		Q2FYI0	Penicillin-binding protein 2	SAOUHSC_01467	3919909	**>	15.6628	16.3559	17.7611	13.8458	14.9228	13.8387	12.3726	13.293	11.1392	16.5932	14.2024	12.2682	2.38033	+	0.00144444	3.3579	cluster2
NPEKLKQGGAQGGQSGMSQ	19	1900.91	Q2G2S6	yes	yes	3	0.0040343	103.04	368200	136860	107020	124330	0	0	0	0	0	0	82	Q2G2S6	Foldase protein PrsA (EC 5.2.1.8)	prsA SAOUHSC_01972	3920448	**>	17.0623	16.7075	16.9238	12.7954	13.5133	12.5874	13.5378	11.7686	12.3366	16.8979	12.9654	12.5477	3.68706	+	0	4.14138	cluster2
VTKPQTTQTVSKIA	14	1500.85	Q2FZK7	yes	yes	3	0.025906	88.101	525900	102360	166920	205870	0	0	0	50762	0	0		Q2FZK7	Bifunctional autolysin [Includes: N-acetylmuramoyl-L-alanine amidase (EC 3.5.1.28); Mannosyl-glycoprotein endo-beta-N-acetylglucosaminidase (EC 3.2.1.96)]	atl nag SAOUHSC_00994	3920394	**>	16.6433	17.3488	17.6514	11.6342	13.8755	13.0351	15.6315	12.5385	12.2091	17.2145	12.8483	13.4597	1.89395	+	0.00285	4.06051	cluster2
LIGDKDSNY	9	1023.49	Q2FVX4	yes	yes	2	0.023099	117.31	382010	241680	32294	108040	0	0	0	0	0	0		Q2FVX4	Molybdenum ABC transporter, periplasmic molybdate-binding protein	SAOUHSC_02549	3921137	**>	17.8827	14.979	16.7212	11.5547	12.7501	12.472	12.1933	11.8847	12.3994	16.5276	12.2589	12.1591	2.74007	+	0	4.31862	cluster2
SAFAAIANGGTYN	13	1255.58	Q2FYI0	yes	yes	2	0.012252	95.094	362500	130260	97175	135060	0	0	0	0	0	0		Q2FYI0	Penicillin-binding protein 2	SAOUHSC_01467	3919909	**>	16.991	16.5683	17.0432	13.0345	14.1461	12.8892	12.1109	12.2341	13.021	16.8675	13.3566	12.4553	4.01448	+	0	3.96156	cluster2
MGPGVKIDTA	10	987.506	Q2G0P0	yes	yes	2	2.0974e-07	180.67	862280	560540	21926	279820	0	0	0	0	0	0		Q2G0P0	50S ribosomal protein L1	rplA SAOUHSC_00519	3920373	**>	19.0965	14.4204	18.0941	12.9641	14.0968	14.3661	12.324	12.9	13.0829	17.2037	13.809	12.769	1.58784	+	0.00494488	3.91464	cluster2
YGPGVVTSRT	10	1035.53	Q2G2J2	yes	yes	2	0.04067	94.309	360740	76519	172680	111550	0	0	0	0	0	0		Q2G2J2	Staphylococcal secretory antigen ssaA2	ssaA2 SAOUHSC_02571	3921568	**>	16.2235	17.3977	16.7673	13.88	13.9015	14.6105	12.7122	12.1723	12.1781	16.7962	14.1307	12.3542	4.21518	+	0	3.55375	cluster2
NAANNEANKFG	11	1148.52	Q2FVQ2	yes	yes	2	7.4682e-06	154.66	898080	510480	0	375750	11847	0	0	0	0	0		Q2FVQ2	Uncharacterized lipoprotein SAOUHSC_02650	SAOUHSC_02650	3921212	**>	18.9615	13.8776	18.5194	13.5322	13.9141	12.3146	12.3983	12.1988	13.2281	17.1195	13.2536	12.6084	1.43144	+	0.0085	4.18848	cluster2
SLTDVTKKLA	10	1074.63	Q2FVX4	yes	yes	2	0.024437	106.4	651030	489140	56011	105880	0	0	0	0	0	0		Q2FVX4	Molybdenum ABC transporter, periplasmic molybdate-binding protein	SAOUHSC_02549	3921137	**>	18.8999	15.7734	16.6921	13.7031	13.4512	13.0663	12.1346	12.472	12.4369	17.1218	13.4069	12.3478	2.69848	+	0.000231214	4.24445	cluster2
SYVAPYYGQNAAPVARQ	17	1853.91	Q2FVQ2	yes	yes	2	2.6616e-64	233.4	853970	545380	49465	107540	24849	126730	0	0	0	0		Q2FVQ2	Uncharacterized lipoprotein SAOUHSC_02650	SAOUHSC_02650	3921212	**>	19.0569	15.5941	16.7145	14.6009	16.9514	13.031	12.1406	12.1522	12.2335	17.1218	14.8611	12.1754	1.67655	+	0.00450411	3.60358	cluster2
SAEVQQTQQASIPASQKANLGNQ	23	2397.19	Q2G170	yes	yes	3	1.89e-13	150.23	560390	232200	30208	297990	0	0	0	0	0	0		Q2G170	5'-nucleotidase, lipoprotein e(P4) family	SAOUHSC_00284	3918967	**>	17.825	14.8826	18.1849	11.7081	13.3542	13.089	12.5121	11.4322	12.0119	16.9642	12.7171	11.9854	2.32966	+	0.00157143	4.61292	cluster2
KSTESNTNQDTNTTKDV	17	1881.86	Q2G105	yes	yes	2,3	1.6339e-26	171.26	707470	361040	293530	52906	0	0	0	0	0	0		Q2G105	Uncharacterized protein	SAOUHSC_00356	3921829	**>	18.4618	18.1631	15.6911	13.0889	13.8173	12.7837	12.6624	11.0077	12.6451	17.4387	13.23	12.1051	2.67281	+	0.000222222	4.77119	cluster2
AIIARESNG	9	929.493	Q2FV52	yes	yes	2	1.1602e-09	203.29	8623100	1301900	482100	1975400	1120700	1360100	2338000	45012	0	0		Q2FV52	Probable transglycosylase IsaA (EC 3.2.-.-) (Immunodominant staphylococcal antigen A)	isaA SAOUHSC_02887	3921556	**>	20.3122	18.879	20.9137	20.096	20.3753	21.1568	15.458	13.1627	11.5862	20.035	20.5427	13.4023	3.02352	+	0	3.06245	cluster4
DNASKMAI	8	848.406	Q2FY21	yes	yes	2	0.016085	149.65	1467000	215060	340040	219050	325350	109090	142590	22748	93028	0		Q2FY21	Penicillin-binding protein 3	SAOUHSC_01652	3920104	**>	17.7144	18.3753	17.7409	18.3116	16.7352	17.1215	14.4735	16.5054	12.0707	17.9435	17.3894	14.3499	1.41187	+	0.00899297	2.0739	cluster4
EQDQQLSNNFGLQ	13	1519.69	Q2G189	yes	yes	2	1.4646e-06	145.29	759110	169800	104370	261830	49975	69914	27791	50794	7922.5	16713		Q2G189	ESAT-6 secretion system extracellular protein A (Ess extracellular protein A)	esxA SAOUHSC_00257	3919199	**>	17.3735	16.6713	17.9983	15.6089	16.0933	14.7623	15.6324	12.9517	14.0287	17.3477	15.4882	14.2043	1.72594	+	0.00419209	2.50147	cluster4
AVSGMNRMA	9	935.432	Q2FXS4	yes	yes	2	0.0048909	138.1	1613800	33735	470760	318490	97131	428160	265530	0	0	0		Q2FXS4	Uncharacterized protein	SAOUHSC_01761	3920559	**>	15.042	18.8446	18.2809	16.5676	18.7078	18.0185	12.8441	13.3366	11.9798	17.3892	17.7646	12.7202	2.10517	+	0.00217391	2.14674	cluster4
ESNTNQDTNTTKDV	14	1565.68	Q2G105	yes	yes	2	5.5136e-20	179.65	20608000	6714600	8275100	3957800	1644700	0	0	0	16164	0		Q2G105	Uncharacterized protein	SAOUHSC_00356	3921829	**>	22.6789	22.9803	21.9163	20.6494	13.3887	12.9201	13.685	13.9805	12.49	22.5252	15.6528	13.3852	1.94477	+	0.00258065	8.0062	cluster4
AVKFINSLEK	10	1147.66	Q2FZ51	yes	yes	2,3	0.0036193	130.41	3859500	1700500	105070	528380	255560	1154100	115930	0	0	0		Q2FZ51	Acyl carrier protein (ACP)	acpP hmrB SAOUHSC_01201	3919468	**>	20.6975	16.681	19.0112	17.9633	20.1383	16.8229	12.7058	11.4033	13.9755	18.7966	18.3082	12.6949	2.1046	+	0.00216606	3.29506	cluster4
EILNEDETTQTALQK	15	1731.85	Q2FW33	yes	yes	2	2.9444e-106	291.2	1878200	629460	83377	258100	215520	375930	210400	62384	22629	20364		Q2FW33	50S ribosomal protein L17	rplQ SAOUHSC_02484	3920861	**>	19.2638	16.3474	17.9776	17.7175	18.5201	17.6828	15.9289	14.4659	14.3137	17.8629	17.9734	14.9028	1.76779	+	0.00383768	1.42475	cluster4
ADNGKKQEIQVA	12	1299.68	Q2FVX4	yes	yes	2	0.025297	92.611	12701000	1553300	2048000	8690400	67684	0	341160	0	0	0		Q2FVX4	Molybdenum ABC transporter, periplasmic molybdate-binding protein	SAOUHSC_02549	3921137	**>	20.5669	20.9658	23.051	16.0465	14.3786	18.3801	12.2735	12.5795	12.0038	21.5279	16.2684	12.2856	3.22914	+	0	7.25089	cluster4
ASIPASQKANLGNQ	14	1397.73	Q2G170	yes	yes	2	9.8624e-35	201.48	8261400	2589900	1499300	4053900	0	53364	48833	0	15998	0		Q2G170	5'-nucleotidase, lipoprotein e(P4) family	SAOUHSC_00284	3918967	**>	21.3045	20.5159	21.9509	13.6164	15.7036	15.5756	12.6982	13.9656	13.7439	21.2571	14.9652	13.4693	4.07762	+	0	7.03985	cluster4
DDPSQSTNVLG	11	1131.5	P02976	yes	yes	2	7.2339e-06	155.11	2207000	623420	725450	315080	172950	139310	91889	22005	97419	19456		P02976	Immunoglobulin G-binding protein A (IgG-binding protein A) (Staphylococcal protein A) (SpA)	spa SAOUHSC_00069	3919448	**>	19.2498	19.4685	18.2654	17.4	17.0879	16.4876	14.4255	16.5719	14.2479	18.9946	16.9918	15.0818	2.33345	+	0.00159276	2.95775	cluster4
AQMTMVQAIN	10	1105.53	Q2G2A5	yes	yes	2	0.003247	133.81	1931300	221540	375080	326630	345830	252840	162080	130230	51998	65061		Q2G2A5	Pyruvate dehydrogenase complex, E1 component, pyruvate dehydrogenase beta subunit, putative (EC 1.2.4.1)	SAOUHSC_01041	3919889	**>	17.7572	18.5168	18.3173	18.3997	17.9479	17.3063	16.9907	15.6662	15.9895	18.1971	17.8846	16.2155	2.00142	+	0.0023165	1.14707	cluster4
ALTQFENETD	10	1166.51	Q2FWB1	yes	yes	2	1.8836e-09	192.12	2160700	199780	293090	420530	349740	496160	401400	0	0	0		Q2FWB1	Uncharacterized protein	SAOUHSC_02387	3919604	**>	17.6081	18.161	18.6818	18.4159	18.9204	18.6147	12.7552	11.4806	12.3677	18.1503	18.6504	12.2011	5.11034	+	0	2.72456	cluster4
ALNNPVLKN	9	981.561	Q2G071	yes	yes	2	0.0014151	152.63	1012700	201200	238970	320880	128750	45462	41617	35852	0	0		Q2G071	Uncharacterized protein	SAOUHSC_00749	3919511	**>	17.6183	17.8665	18.2917	16.9742	15.4724	15.3449	15.1298	12.2814	12.4148	17.9255	15.9305	13.2753	2.25322	+	0.00173109	3.32257	cluster4
DSKTGGLVAI	10	959.529	Q2FYI0	yes	yes	2	0.0088569	120.99	1914900	269660	447080	798900	110180	148730	87685	28283	24405	0		Q2FYI0	Penicillin-binding protein 2	SAOUHSC_01467	3919909	**>	18.0408	18.7702	19.6077	16.7495	17.1823	16.42	14.7876	14.5749	12.587	18.8062	16.784	13.9832	2.8447	+	0	3.42264	cluster4
ESNTNQDTNTTKDVIAL	17	1862.89	Q2G105	yes	yes	2	2.5223e-45	211.75	8495200	2992200	4723700	121240	228920	300460	90017	17428	21220	0		Q2G105	Uncharacterized protein	SAOUHSC_00356	3921829	**>	21.5128	22.1715	16.8875	17.8045	18.1968	16.4579	14.0891	14.3731	12.1662	20.1906	17.4864	13.5428	1.86156	+	0.00303704	4.67598	cluster4
DYTGQAMVTD	10	1099.45	Q2FVQ2	yes	yes	2	9.5495e-07	170.47	1298300	234160	189360	313860	76308	89086	77644	122560	114590	80695	14	Q2FVQ2	Uncharacterized lipoprotein SAOUHSC_02650	SAOUHSC_02650	3921212	**>	17.8371	17.5308	18.2598	16.2195	16.4429	16.2446	16.9031	16.8061	16.3002	17.8759	16.3023	16.6698	2.86423	+	0	1.38981	cluster4
AINNDGAKLGT	11	1072.55	Q2FZA4	yes	yes	2	0.0002704	148.28	774730	43232	51263	299900	55332	221870	103130	0	0	0		Q2FZA4	Uncharacterized protein	SAOUHSC_01135	3920734	**>	15.3998	15.6456	18.1941	15.7558	17.7594	16.6541	13.3409	13.3274	11.9827	16.4132	16.7231	12.8837	1.93139	+	0.00263259	1.60981	cluster4
GPQAANVVKL	10	995.576	Q2FYN2	yes	yes	2	0.0030382	135.71	1044600	138740	125590	230030	124700	142580	88244	97957	56379	40416		Q2FYN2	Cold shock protein CspA	cspA SAOUHSC_01403	3920693	**>	17.082	16.9384	17.8115	16.9281	17.1214	16.4292	16.5799	15.7829	15.3026	17.2773	16.8262	15.8885	1.41994	+	0.00873934	0.919933	cluster4
TFVEKAGELND	11	1221.59	Q2FY34	yes	yes	2	2.2722e-06	164.81	1898700	397850	345400	262540	290250	171060	96886	130540	135640	68506		Q2FY34	Probable glycine dehydrogenase (decarboxylating) subunit 1 (EC 1.4.4.2) (Glycine cleavage system P-protein subunit 1) (Glycine decarboxylase subunit 1) (Glycine dehydrogenase (aminomethyl-transferring) subunit 1)	gcvPA SAOUHSC_01633	3919970	**>	18.6019	18.3979	18.0022	18.1469	17.3841	16.564	16.9941	17.0494	16.0639	18.334	17.365	16.7025	1.41745	+	0.00887943	1.30022	cluster4
NNQIETLQYK	10	1249.63	Q2FXI5	yes	yes	2	2.1622e-13	202.56	924030	160730	137520	243960	98184	90598	43356	62516	51640	35517		Q2FXI5	Uncharacterized protein	SAOUHSC_01861	3920539	**>	17.2943	17.0693	17.8963	16.5832	16.4672	15.4039	15.9319	15.6562	15.1162	17.4199	16.1514	15.5681	1.94779	+	0.002589	1.56017	cluster4
QDQQLSNNFGLQ	12	1390.65	Q2G189	yes	yes	2	8.5222e-20	208.27	1449700	317060	288400	296880	82555	134920	118370	145420	35908	30220		Q2G189	ESAT-6 secretion system extracellular protein A (Ess extracellular protein A)	esxA SAOUHSC_00257	3919199	**>	18.2744	18.1377	18.1795	16.3331	17.0417	16.8529	17.1499	15.132	14.8832	18.1972	16.7426	15.7217	1.72413	+	0.00416854	1.96507	cluster4
STDQNTLYS	9	1027.45	Q2FXF4	yes	yes	2	1.6364e-31	248.81	2492000	623370	664280	524630	164950	122970	58357	97532	107440	128440		Q2FXF4	Uncharacterized protein	SAOUHSC_01895	3920842	**>	19.2497	19.3414	19.0009	17.3317	16.9079	15.8326	16.5736	16.7132	16.9707	19.1974	16.6907	16.7525	3.02182	+	0	2.47575	cluster4
GEDEIGDDDNDKVKA	15	1618.7	Q2G115	yes	yes	3	0.00051102	108.72	1371800	127380	70920	221660	341110	322320	164260	51051	33697	39369		Q2G115	Ribosome-binding ATPase YchF	ychF SAOUHSC_00346	3921819	**>	16.9588	16.1139	17.758	18.3799	18.2981	17.3256	15.6397	15.0403	15.2648	16.9436	18.0012	15.3149	2.32183	+	0.00155752	0.285492	cluster4
SQYAEMSLVYDQLT	14	1646.75	Q2G2A0	yes	yes	2	0.044539	47.712	998310	369260	88372	161570	49304	210060	40366	35144	24960	19265		Q2G2A0	Uncharacterized protein	SAOUHSC_01694	3921806	**>	18.4943	16.4313	17.3018	15.5894	17.6804	15.3009	15.101	14.6073	14.2337	17.4091	16.1902	14.6473	1.40914	+	0.00903738	1.99034	cluster4
NSVTSGIISA	10	947.492	Q2FXJ6	yes	yes	2	0.0033107	133.23	850610	94637	256530	312640	44366	41102	28999	13945	58393	0		Q2FXJ6	Uncharacterized protein	SAOUHSC_01838	3921788	**>	16.5301	17.9688	18.2541	15.4372	15.3269	14.8237	13.7675	15.8335	12.8679	17.5843	15.1959	14.1563	1.75023	+	0.00411527	2.90822	cluster4
SSFGQSTTVTPVQM	14	1468.69	Q2FZ94	yes	yes	2	3.3251e-07	127.79	1169800	117380	315830	312880	122280	173390	68868	25855	33289	0	42	Q2FZ94	Penicillin-binding protein 1	SAOUHSC_01145	3920705	**>	16.8408	18.2688	18.2552	16.8998	17.4037	16.0715	14.6582	15.0228	13.3687	17.7883	16.7917	14.3499	2.33263	+	0.00158559	2.21752	cluster4
QDTNTTKDVIA	11	1204.59	Q2G105	yes	yes	2	0.006676	112.83	891170	169800	358150	194990	54443	36297	30864	22117	24503	0		Q2G105	Uncharacterized protein	SAOUHSC_00356	3921829	**>	17.3735	18.4502	17.573	15.7325	15.1476	14.9136	14.4329	14.5807	13.4882	17.7989	15.2646	14.1672	3.35583	+	0	3.08302	cluster4
MSKYSQDVL	9	1069.51	Q2G258	yes	yes	2	0.033611	49.715	2593900	806250	621290	784220	77797	73860	37871	77514	89837	25252	76	Q2G258	Bifunctional ligase/repressor BirA (Biotin--[acetyl-CoA-carboxylase] ligase) (EC 6.3.4.15) (Biotin--protein ligase) (Biotin-[acetyl-CoA carboxylase] synthetase)	birA SAOUHSC_01473	3919915	**>	19.6209	19.2449	19.5809	16.2474	16.1725	15.2088	16.2422	16.455	14.6241	19.4822	15.8762	15.7738	3.08725	+	0	3.65722	cluster4
SSFGQSTTVTPV	12	1209.59	Q2FZ94	yes	yes	2	0.0018751	117.25	3311700	363410	921010	1053700	409970	195370	172280	60551	112600	22795		Q2FZ94	Penicillin-binding protein 1	SAOUHSC_01145	3920705	**>	18.4712	19.8129	20.007	18.6452	17.5758	17.3944	15.8859	16.7808	14.4764	19.4304	17.8718	15.7144	2.14016	+	0.00227273	2.63729	cluster4
VEGDRGPQAANVVKL	15	1551.84	Q2FYN2	yes	yes	3	5.621e-06	119.25	933840	345220	73705	68376	89300	319940	37300	0	0	0		Q2FYN2	Cold shock protein CspA	cspA SAOUHSC_01403	3920693	**>	18.3972	16.1695	16.0612	16.4464	18.2874	15.1869	12.8502	12.464	13.8072	16.8759	16.6402	13.0405	1.8004	+	0.00340653	2.0356	cluster4
VAPYYGQNAAPVARQ	15	1603.81	Q2FVQ2	yes	yes	2	2.4362e-27	190.85	2250200	306340	515930	209070	952230	134120	60549	0	31789	40219		Q2FVQ2	Uncharacterized lipoprotein SAOUHSC_02650	SAOUHSC_02650	3921212	**>	18.2248	18.9768	17.6736	19.861	17.0332	15.8858	13.087	14.9562	15.2956	18.2917	17.5933	14.4463	1.46922	+	0.00709677	2.27194	cluster4
VDYTGQAMVTDPNYQQ	16	1828.79	Q2FVQ2	yes	yes	2	9.9997e-45	211.7	1130400	370820	254140	243160	78075	101770	13653	41354	11532	15925	14	Q2FVQ2	Uncharacterized lipoprotein SAOUHSC_02650	SAOUHSC_02650	3921212	**>	18.5004	17.9553	17.8915	16.2526	16.635	13.7369	15.3357	13.4934	13.959	18.1157	15.5415	14.2627	1.89829	+	0.00277116	3.21363	cluster4
GDNKLGGDDFD	11	1151.47	Q2FXZ2	yes	yes	2	0.0028618	127.87	1063200	175480	286210	263620	116620	98134	32384	12850	77889	0		Q2FXZ2	Chaperone protein DnaK (HSP70) (Heat shock 70 kDa protein) (Heat shock protein 70)	dnaK SAOUHSC_01683	3921795	**>	17.4209	18.1267	18.0081	16.8315	16.5825	14.983	13.6495	16.2491	11.7916	17.8519	16.1323	13.8967	1.3938	+	0.00982407	2.83741	cluster4
TNQDTNTTKDVIA	13	1419.68	Q2G105	yes	yes	2	2.4041e-05	137.84	1024400	216670	316300	246680	87976	66256	35748	30882	23845	0		Q2G105	Uncharacterized protein	SAOUHSC_00356	3921829	**>	17.7251	18.2709	17.9123	16.4248	16.0158	15.1256	14.9145	14.5414	11.9245	17.9695	15.8554	13.7935	2.12846	+	0.00225564	3.14502	cluster4
NIRNGQQIVIP	11	1250.71	Q2FYF1	yes	yes	2	0.0028808	127.76	2492700	774970	82391	581750	61044	823750	116830	35315	16650	0		Q2FYF1	Elastin-binding protein EbpS	ebpS SAOUHSC_01501	3919044	**>	19.5638	16.3302	19.15	15.8976	19.6518	16.8341	15.108	14.0232	12.9888	18.348	17.4612	14.04	1.40123	+	0.0095907	2.59743	cluster4
SSTDQNTLYSM	11	1245.52	Q2FXF4	yes	yes	2	9.1253e-05	152.54	2209000	276260	639800	701890	278100	114150	87432	25289	78162	7881.2	22	Q2FXF4	Uncharacterized protein	SAOUHSC_01895	3920842	**>	18.0757	19.2873	19.4209	18.0852	16.8006	16.4159	14.6262	16.2542	12.9442	18.9279	17.1006	14.6082	1.954	+	0.00261438	3.07356	cluster4
QYDDSKVAVS	10	1110.52	Q2FV63	yes	yes	2	0.031872	99.973	779960	239140	0	80399	238570	122050	99804	0	0	0		Q2FV63	Copper chaperone CopZ	copZ SAOUHSC_02874	3921545	**>	17.8675	14.5984	16.2949	17.8641	16.8971	16.6068	12.8629	12.7197	12.0016	16.2536	17.1227	12.5281	2.41536	+	0.0010566	1.42823	cluster4
SYQPQNKINV	10	1189.61	Q2G0Z9	yes	yes	2	0.0037898	128.86	2291100	217080	627020	1231600	0	90382	50590	13502	47200	13654		Q2G0Z9	Uncharacterized protein	SAOUHSC_00362	3919781	**>	17.7279	19.2582	20.2321	14.3375	16.4637	15.6266	13.7209	15.5265	13.737	19.0727	15.4759	14.3281	2.29358	+	0.00151073	4.17068	cluster4
VEILNEDETTQTALQK	16	1830.92	Q2FW33	yes	yes	2,3	9.2519e-119	288.42	2154700	340690	23811	73852	100940	1485900	112890	16661	0	0		Q2FW33	50S ribosomal protein L17	rplQ SAOUHSC_02484	3920861	**>	18.3781	14.5393	16.1723	16.6231	20.5029	16.7846	14.0242	12.755	12.397	16.3633	17.9702	13.0587	1.44501	+	0.00794132	0.848795	cluster4
QLESKNQQLEA	11	1286.65	Q2FXS6	yes	yes	2	3.857e-10	187.85	2950700	329690	1307200	875590	166510	85280	119350	0	38545	28506		Q2FXS6	Cell shape-determining protein MreC (Cell shape protein MreC)	SAOUHSC_01759	3920557	**>	18.3308	20.318	19.7399	17.3452	16.3799	16.8648	13.2911	15.2343	14.799	19.4629	16.8633	14.4414	2.88609	+	0	3.81051	cluster4
TDGPIKVNSEIG	12	1228.63	Q2FUX7	yes	yes	2	7.0041e-05	146.16	4819900	2175600	400960	1846000	128650	94198	46326	87158	21861	19145		Q2FUX7	Arginine deiminase (ADI) (EC 3.5.3.6) (Arginine dihydrolase) (AD)	arcA SAOUHSC_02969	3921670	**>	21.053	18.6131	20.816	16.9731	16.5234	15.4995	16.4113	14.4161	14.2247	20.1607	16.332	15.0174	2.45227	+	0.00100971	4.486	cluster4
VNRNQATDPHPT	12	1348.65	Q2FYI0	yes	yes	3	0.013114	97.734	856240	187130	194800	225900	77882	95848	74681	0	0	0		Q2FYI0	Penicillin-binding protein 2	SAOUHSC_01467	3919909	**>	17.5137	17.5716	17.7853	16.249	16.5485	16.1885	11.7528	12.9443	12.2767	17.6235	16.3286	12.3246	5.25076	+	0	3.29692	cluster4
VVMDAKTGEILA	12	1245.66	Q2FZ94	yes	yes	2	1.885e-07	163.78	3159600	1052400	583100	995680	122140	244960	84367	37515	31160	8272.6	43	Q2FZ94	Penicillin-binding protein 1	SAOUHSC_01145	3920705	**>	20.0053	19.1534	19.9253	16.8982	17.9022	16.3644	15.1952	14.9274	13.0141	19.6947	17.0549	14.3789	3.05568	+	0	3.97774	cluster4
PKDETKSTESNTNQDTNTTKD	21	2353.05	Q2G105	yes	yes	3	4.1851e-39	194.27	1337200	370960	322770	150590	0	0	492900	0	0	0		Q2G105	Uncharacterized protein	SAOUHSC_00356	3921829	**>	18.5009	18.3001	17.2003	14.4872	13.6899	18.9109	12.9776	11.9	13.1614	18.0004	15.696	12.6797	1.598	+	0.0049418	3.81258	cluster4
LKDVKTSPEDA	11	1201.62	Q2G105	yes	yes	2	0.00029804	147.62	5171100	1473000	1256000	1224100	876220	100290	107100	55196	79194	0		Q2G105	Uncharacterized protein	SAOUHSC_00356	3921829	**>	20.4903	20.2604	20.2233	19.7409	16.6138	16.7086	15.7523	16.2731	12.6873	20.3247	17.6878	14.9042	1.86246	+	0.00304644	4.02868	cluster4
QVTQPTNDAQHVYV	14	1598.77	Q2FXS4	yes	yes	2	1.0309e-90	273.27	3769100	445120	480250	2127100	244200	260680	161760	0	36702	13281		Q2FXS4	Uncharacterized protein	SAOUHSC_01761	3920559	**>	18.7638	18.8734	21.0205	17.8977	17.9919	17.3035	13.1533	15.1636	13.6971	19.5526	17.731	14.0047	2.92617	+	0	3.68472	cluster4
PNEDVVESDPSTTKA	15	1587.73	Q2FYF9	yes	yes	2	8.818e-36	209.6	1979800	73425	175970	415170	560510	514490	220440	9742.9	0	10089		Q2FYF9	30S ribosomal protein S1, putative	SAOUHSC_01493	3920248	**>	16.164	17.425	18.6633	19.0964	18.9728	17.75	13.2501	12.5336	13.3005	17.4174	18.6064	13.0281	3.26572	+	0	1.6002	cluster4
SANSDTFRVNT	11	1210.56	Q2G188	yes	yes	2	2.3444e-20	215.72	2604800	500360	517210	1010100	280480	99796	118460	78375	0	0		Q2G188	ESAT-6 secretion accessory factor EsaA	esaA SAOUHSC_00258	3919200	**>	18.9326	18.9804	19.9461	18.0975	16.6067	16.854	16.2581	12.4042	12.4324	19.2864	17.1861	13.6982	2.11367	+	0.00218978	3.84419	cluster4
YYSDGVTGIKA	11	1172.57	Q2FYI0	yes	yes	2	9.1296e-05	152.54	2088800	465950	463570	562290	244520	305930	35973	0	10535	0		Q2FYI0	Penicillin-binding protein 2	SAOUHSC_01467	3919909	**>	18.8298	18.8224	19.101	17.8996	18.2228	15.1346	13.0404	13.3629	13.5634	18.9177	17.0857	13.3222	2.89194	+	0	3.71377	cluster4
LVDRPTLL	8	925.56	Q2FXF4	yes	yes	2	0.035367	133.86	2408500	793710	727680	593660	71647	145070	48283	0	28483	0		Q2FXF4	Uncharacterized protein	SAOUHSC_01895	3920842	**>	19.5983	19.4729	19.1793	16.1286	17.1464	15.5592	12.6819	14.7978	13.8899	19.4168	16.2781	13.7899	3.44852	+	0	4.38285	cluster4
KSSAEVQQTQQASIPA	16	1671.84	Q2G170	yes	yes	2	1.5148e-06	120.66	2496400	304300	325530	1091800	453430	182440	103630	0	35320	0		Q2G170	5'-nucleotidase, lipoprotein e(P4) family	SAOUHSC_00284	3918967	**>	18.2151	18.3124	20.0583	18.7905	17.4771	16.6611	12.185	15.1082	12.1214	18.8619	17.6429	13.1382	2.39877	+	0.0011907	3.47141	cluster4
KSSAEVQQTQQASIPASQKAN	21	2200.11	Q2G170	yes	yes	3	0.00031636	118.96	4309600	1028800	1207400	1038900	201910	781580	0	0	0	50980		Q2G170	5'-nucleotidase, lipoprotein e(P4) family	SAOUHSC_00284	3918967	**>	19.9725	20.2035	19.9866	17.6234	19.576	14.0004	13.3511	12.5115	15.6376	20.0542	17.0666	13.8334	1.71496	+	0.0041337	4.6042	cluster4
STGIHAPKSA	10	967.509	Q2G0Z9	yes	yes	2	0.003022	135.86	11425000	1846000	2530600	5300200	1199300	0	400670	40900	107720	0		Q2G0Z9	Uncharacterized protein	SAOUHSC_00362	3919781	**>	20.816	21.271	22.3376	20.1938	13.7601	18.6121	15.3198	16.7169	13.1128	21.4749	17.522	15.0498	1.46548	+	0.00724752	5.18898	cluster4
GQISNTEELNQHE	13	1497.67	Q2FVG0	yes	yes	2	2.8198e-94	286.09	4012200	290850	501380	0	983840	1548200	687950	0	0	0		Q2FVG0	ABC transporter, ATP-binding protein, putative	SAOUHSC_02754	3921626	**>	18.1499	18.9355	14.0394	19.9081	20.5622	19.3919	12.3059	14.2846	13.8284	17.0416	19.9541	13.473	2.0421	+	0.00220209	0.328101	cluster4
SKAGDVTVADT	11	1062.52	Q2G2S6	yes	yes	2	4.0944e-08	165.63	6929100	0	2405800	4378300	0	0	145000	0	0	0		Q2G2S6	Foldase protein PrsA (EC 5.2.1.8)	prsA SAOUHSC_01972	3920448	**>	15.2564	21.1981	22.0619	13.9252	13.6331	17.1457	12.7782	13.0628	12.7655	19.5055	14.9013	12.8688	1.42087	+	0.00878095	5.6204	cluster4
VTRDGETIEYDHT	13	1534.69	Q2FYI0	yes	yes	2,3	1.7369e-80	160.67	2904700	710060	225040	1440700	0	376160	152690	0	0	0		Q2FYI0	Penicillin-binding protein 2	SAOUHSC_01467	3919909	**>	19.4376	17.7798	20.4583	13.5591	18.521	17.2202	13.3054	11.9305	12.3323	19.2252	16.4334	12.5227	2.04399	+	0.0020979	4.74716	cluster4
NTNQDTNTTKDVIAL	15	1646.81	Q2G105	yes	yes	2	2.3504e-14	161.04	2517300	719830	563520	982920	100440	124520	26051	0	0	0		Q2G105	Uncharacterized protein	SAOUHSC_00356	3921829	**>	19.4573	19.1041	19.9067	16.616	16.926	14.6691	13.0064	11.873	12.2532	19.4894	16.0703	12.3776	3.90692	+	0	5.26542	cluster4
KSSAEVQQTQQASIPASQKANLGNQ	25	2612.32	Q2G170	yes	yes	3	2.8424e-09	133.65	16149000	8519300	289000	6283700	0	1056800	0	0	0	0		Q2G170	5'-nucleotidase, lipoprotein e(P4) family	SAOUHSC_00284	3918967	**>	23.0223	18.1407	22.5832	13.344	20.0113	12.9171	13.0425	12.8478	12.7947	21.2487	15.4241	12.895	1.58654	+	0.00493194	7.08917	cluster4
ALDQSGGSTPKA	12	1130.56	Q2FV17	yes	yes	2	0.011262	100.04	929910	0	0	0	98624	90393	257480	60069	79435	343910		Q2FV17	Fructose-bisphosphate aldolase class 1 (EC 4.1.2.13) (Fructose-bisphosphate aldolase class I) (FBP aldolase)	fda SAOUHSC_02926	3921377	**>	14.3168	13.3264	13.6716	16.5897	16.4639	17.9741	15.8743	16.2775	18.3917	13.7716	17.0092	16.8478	1.98487	+	0.00234114	-3.15694	cluster6
ETDEVVPDKNATSEDSEEA	19	2063.87	Q2G0S5	yes	yes	2	3.571e-64	216.26	11779000	0	0	0	0	0	0	3705100	4462900	3611400		Q2G0S5	Putative septation protein SpoVG	spoVG SAOUHSC_00469	3920329	**>	14.0454	12.963	12.8269	13.0818	14.8306	13.1909	21.8211	22.0896	21.7841	13.2784	13.7011	21.8983	5.10776	+	0	-4.52124	cluster6
DANGIASYR	9	965.457	Q2FY36	yes	yes	2	0.00097151	157.66	1728400	0	57611	138770	336910	383100	294140	233430	168890	115600		Q2FY36	Uncharacterized protein	SAOUHSC_01630	3919968	**>	13.8823	15.8141	17.0823	18.362	18.5474	18.1661	17.8326	17.3657	16.8188	15.5929	18.3585	17.339	1.4444	+	0.00790268	-2.25589	cluster6
EIKNITQD	8	959.492	Q2FW79	yes	yes	2	0.031999	135.83	693480	0	0	30296	40682	107040	102890	121950	155610	135010		Q2FW79	UPF0457 protein SAOUHSC_02425	SAOUHSC_02425	3919635	**>	15.2939	13.6316	14.8868	15.3121	16.7078	16.6507	16.8959	17.2476	17.0427	14.6041	16.2235	17.0621	1.90995	+	0.00259937	-2.03868	cluster6
ETTSSTSIPIS	11	1121.55	Q2FVN2	yes	yes	2	0.0043073	121.73	383480	0	0	0	0	0	0	179580	137240	66658		Q2FVN2	Uncharacterized protein	SAOUHSC_02670	3921232	**>	14.391	13.5361	13.1459	13.6314	14.3815	13.5566	17.4543	17.0663	16.0245	13.691	13.8565	16.8484	2.88633	+	0	-1.6614	cluster6
ANGIASYRA	9	921.467	Q2FY36	yes	yes	2	0.012391	126.07	1143200	0	0	0	227380	171970	141510	189820	311620	100860		Q2FY36	Uncharacterized protein	SAOUHSC_01630	3919968	**>	14.6612	13.2622	14.47	17.7947	17.3918	17.1105	17.5343	18.2494	16.622	14.1311	17.4324	17.4686	2.87825	+	0	-3.31932	cluster6
DTTSMNVSNKQSQNVQN	17	1893.85	Q2G260	yes	yes	2	6.3473e-10	134.25	477370	0	0	0	110390	250470	116510	0	0	0		Q2G260	Uncharacterized protein SAOUHSC_00094	SAOUHSC_00094	3919805	**>	13.4495	12.4233	13.5942	16.7523	17.9343	16.8301	12.4877	13.8827	12.8166	13.1557	17.1722	13.0623	3.34182	+	0	-1.96161	cluster6
EIKNITQDQD	10	1202.58	Q2FW79	yes	yes	2	0.003247	133.81	355380	27402	0	30012	47037	53416	40451	49844	55283	51932		Q2FW79	UPF0457 protein SAOUHSC_02425	SAOUHSC_02425	3919635	**>	14.742	13.2339	14.8733	15.5215	15.705	15.3039	15.6051	15.7545	15.6643	14.283	15.5101	15.6747	1.42292	+	0.00882297	-1.30936	cluster6
ANEILDAANNTGGAVK	16	1556.78	P48940	yes	yes	2	2.5141e-103	280.5	1186800	85470	26022	131980	233240	430390	158370	64059	35850	21432		P48940	30S ribosomal protein S7	rpsG SAOUHSC_00528	31634816	**>	16.3831	14.6674	17.01	17.8315	18.7153	17.2729	15.9671	15.1297	14.3875	16.0202	17.9399	15.1614	1.56092	+	0.00544703	-0.530481	cluster6
GSDESDAIQA	10	991.409	Q2FZH6	yes	yes	2	0.018478	111.61	436370	0	24256	27039	104610	47973	58525	64431	67273	42259		Q2FZH6	Phosphocarrier protein hpr, putative	SAOUHSC_01028	3920288	**>	14.3689	14.5661	14.7228	16.6747	15.5499	15.8368	15.9755	16.0377	15.367	14.5526	16.0205	15.7934	2.00794	+	0.00232432	-1.35435	cluster6
NPELLLMEG	9	1014.51	Q2G2A4	yes	yes	2	0.011755	128.38	609450	100760	70608	157340	64630	79824	39948	37946	29033	29355	77	Q2G2A4	Dihydrolipoamide acetyltransferase component of pyruvate dehydrogenase complex (EC 2.3.1.-)	SAOUHSC_01042	3919890	**>	16.6206	16.1075	17.2635	15.9799	16.2845	15.2858	15.2117	14.8254	14.8413	16.6639	15.8501	14.9595	1.92412	+	0.00261587	1.2591	cluster6
YDDSKVAVSQ	10	1110.52	Q2FV63	yes	yes	2	1.5729e-05	164.9	1242500	45655	84961	39402	109800	104240	102880	126710	397770	231050		Q2FV63	Copper chaperone CopZ	copZ SAOUHSC_02874	3921545	**>	15.4785	16.3745	15.266	16.7445	16.6695	16.6506	16.9512	18.6016	17.8178	15.7063	16.6882	17.7902	1.85887	+	0.00302769	-1.53288	cluster6
ILDAANNTGGAVK	13	1242.66	P48940	yes	yes	2	1.1425e-06	147.33	1986000	65070	65174	155280	630200	468820	172310	208100	115110	105950		P48940	30S ribosomal protein S7	rpsG SAOUHSC_00528	31634816	**>	15.9897	15.992	17.2445	19.2654	18.8387	17.3946	17.6669	16.8127	16.693	16.4087	18.4996	17.0575	1.40698	+	0.00930536	-1.36982	cluster6
IKNITQDQDIH	11	1323.68	Q2FW79	yes	yes	3	0.011484	107.06	240910	0	0	0	42641	57714	72542	30384	28877	8751.2		Q2FW79	UPF0457 protein SAOUHSC_02425	SAOUHSC_02425	3919635	**>	13.6778	13.1128	14.0756	15.38	15.8166	16.1465	14.891	14.8176	13.0953	13.6221	15.781	14.268	1.67034	+	0.00454496	-1.40243	cluster6
ILNEDETTQ	9	1061.49	Q2FW33	yes	yes	2	0.017825	121.5	595800	32162	14265	29795	124240	73666	146360	76971	41790	56552		Q2FW33	50S ribosomal protein L17	rplQ SAOUHSC_02484	3920861	**>	14.9731	13.8002	14.8628	16.9228	16.1687	17.1592	16.232	15.3509	15.7873	14.5453	16.7502	15.7901	2.13813	+	0.00226415	-1.72479	cluster6
QYDDSKVAVSQ	11	1238.58	Q2FV63	yes	yes	2	0.00039678	145.28	316140	0	0	0	0	34414	42542	42628	132270	64293		Q2FV63	Copper chaperone CopZ	copZ SAOUHSC_02874	3921545	**>	14.2002	13.2778	13.7085	14.0621	15.0707	15.3766	15.3795	17.0131	15.9724	13.7288	14.8365	16.1217	1.85108	+	0.00299088	-1.75027	cluster6
VPNNVQVQS	9	983.504	Q2FW64	yes	yes	2	0.0023919	147.19	840530	68074	23459	0	91121	59087	58984	133050	238360	168390		Q2FW64	Uncharacterized protein	SAOUHSC_02443	3919007	**>	16.0548	14.5179	13.4954	16.4755	15.8506	15.848	17.0216	17.8628	17.3614	14.6893	16.058	17.4153	1.74948	+	0.00410345	-2.0473	cluster6
NIQLVNTYKE	10	1220.64	Q2G1K8	yes	yes	2	3.0119e-07	179.42	396530	24159	30385	0	204490	94463	22217	12795	8018.7	0		Q2G1K8	Capsular polysaccharide biosynthesis protein, putative	SAOUHSC_00114	3919823	**>	14.5603	14.8911	13.1645	17.6417	16.5275	14.4394	13.6433	12.9692	12.5839	14.2053	16.2028	13.0655	1.4344	+	0.00836893	-0.428853	cluster6
ISERIETTE	9	1076.54	Q2FW33	yes	yes	2	0.026048	114.97	1540900	98466	0	57849	303780	448620	408440	112490	69247	41990		Q2FW33	50S ribosomal protein L17	rplQ SAOUHSC_02484	3920861	**>	16.5873	13.1191	15.82	18.2127	18.7751	18.6398	16.7794	16.0795	15.3578	15.1755	18.5425	16.0722	1.56842	+	0.00534375	-2.13189	cluster6
VGEDEIGDDDNDKVKA	16	1717.76	Q2G115	yes	yes	3	0.0018065	101.3	604080	18618	23381	0	194190	222980	99384	23526	21993	0		Q2G115	Ribosome-binding ATPase YchF	ychF SAOUHSC_00346	3921819	**>	14.1844	14.513	13.0509	17.5671	17.7666	16.6007	14.522	14.4248	13.0649	13.9161	17.3115	14.0039	2.68445	+	0.000227273	-1.74155	cluster6
SQDVNELSKQPTPD	14	1556.73	Q2G0M7	yes	yes	2	4.9977e-43	223.39	514530	0	0	0	0	0	0	355600	77630	81298		Q2G0M7	Protein/nucleic acid deglycase HchA (EC 3.1.2.-) (EC 3.5.1.-) (EC 3.5.1.124) (Maillard deglycase)	hchA SAOUHSC_00533	3920386	**>	15.1576	13.5525	14.0923	12.6929	13.6544	13.598	18.4399	16.2443	16.3109	14.2675	13.3151	16.9984	2.18633	+	0.00218182	-0.889278	cluster6
GDGSYISRG	9	910.414	Q2FY41	yes	yes	2	6.9914e-07	128.86	257100	0	0	0	36625	121560	98916	0	0	0		Q2FY41	Elongation factor P (EF-P)	efp SAOUHSC_01625	3919963	**>	14.5296	13.3165	12.9629	15.1605	16.8913	16.5939	12.1084	11.5286	13.5538	13.603	16.2153	12.3969	2.18827	+	0.00206349	-0.703062	cluster6
TKQDIQDTLN	10	1174.58	Q2FZI0	yes	yes	2	0.0016569	145.28	1553400	119380	48310	0	676070	304350	284900	35442	84973	0		Q2FZI0	Uncharacterized protein	SAOUHSC_01024	3920284	**>	16.8652	15.56	14.4672	19.3668	18.2154	18.1201	15.1132	16.3747	12.1603	15.6308	18.5674	14.5494	1.41585	+	0.0090566	-0.927619	cluster6
IVQQILNK	8	954.586	Q2FY36	yes	yes	2	0.0077248	176.66	1237300	0	0	0	233550	422470	225100	186120	109070	61009		Q2FY36	Uncharacterized protein	SAOUHSC_01630	3919968	**>	14.7153	13.0032	13.8242	17.8334	18.6885	17.7802	17.5059	16.7349	15.8967	13.8476	18.1007	16.7125	2.94688	+	0	-3.55903	cluster6
TDEVVPDKNATSEDSEEA	18	1934.82	Q2G0S5	yes	yes	2	3.3226e-38	185.14	600850	0	0	0	0	0	0	226050	180320	194470		Q2G0S5	Putative septation protein SpoVG	spoVG SAOUHSC_00469	3920329	**>	14.366	13.1114	13.4791	12.8639	13.7187	13.3028	17.7863	17.4602	17.5692	13.6522	13.2951	17.6052	4.36047	+	0	-1.79803	cluster6
LNEDETTQTA	10	1120.49	Q2FW33	yes	yes	2	9.2072e-08	182.28	949190	0	0	0	133920	233370	288270	118670	91177	83773		Q2FW33	50S ribosomal protein L17	rplQ SAOUHSC_02484	3920861	**>	14.1099	13.0113	12.5248	17.031	17.8323	18.1371	16.8566	16.4764	16.3542	13.2154	17.6668	16.5624	3.63554	+	0	-3.89922	cluster6
LDQSGGSTPKA	11	1059.52	Q2FV17	yes	yes	2	4.6213e-06	160.22	1360800	24774	146800	0	0	0	0	63709	834700	290770		Q2FV17	Fructose-bisphosphate aldolase class 1 (EC 4.1.2.13) (Fructose-bisphosphate aldolase class I) (FBP aldolase)	fda SAOUHSC_02926	3921377	**>	14.5965	17.1635	13.7188	12.789	14.1779	13.0819	15.9592	19.6709	18.1495	15.1596	13.3496	17.9265	1.51839	+	0.0060303	-0.478473	cluster6
NKENPDVILA	10	1111.59	Q2G071	yes	yes	2	0.030825	100.88	724140	0	0	0	0	0	0	210810	308940	204390		Q2G071	Uncharacterized protein	SAOUHSC_00749	3919511	**>	14.2165	12.0183	14.9623	13.7206	13.3013	12.7279	17.6856	18.237	17.641	13.7324	13.2499	17.8545	2.72758	+	0	-1.8198	cluster6
FSASAQPRSVA	11	1119.57	Q2FZK7	yes	yes	2	2.1409e-14	204.17	978210	0	0	0	0	0	0	494370	166320	317520		Q2FZK7	Bifunctional autolysin [Includes: N-acetylmuramoyl-L-alanine amidase (EC 3.5.1.28); Mannosyl-glycoprotein endo-beta-N-acetylglucosaminidase (EC 3.2.1.96)]	atl nag SAOUHSC_00994	3920394	**>	14.7041	13.3197	13.4041	13.7519	13.9468	12.3862	18.9152	17.3436	18.2765	13.8093	13.3617	18.1784	3.22604	+	0	-1.96072	cluster6
FSDEVVEK	8	951.455	Q2FW66	yes	yes	2	0.012218	156.51	1194500	0	37503	0	864360	176120	116540	0	0	0		Q2FW66	Alkaline shock protein 23	asp23 SAOUHSC_02441	3919005	**>	14.5138	15.1947	13.2663	19.7213	17.4262	16.8305	12.0335	12.9677	13.4359	14.3249	17.9926	12.8124	2.46015	+	0.000851485	-1.07758	cluster6
NDPTAPGTDHT	11	1124.47	Q2G227	yes	yes	2	0.0066987	112.75	1362600	0	84896	67494	316330	380980	435900	77017	0	0		Q2G227	Phosphopentomutase (EC 5.4.2.7) (Phosphodeoxyribomutase)	deoB SAOUHSC_00101	3919810	**>	13.5966	16.3734	16.0425	18.2711	18.5394	18.7336	16.2329	11.3922	12.0342	15.3375	18.5147	13.2197	1.55531	+	0.00551157	-0.529712	cluster6
INNIEAVMTNQ	11	1245.6	Q2FZW9	yes	yes	2	0.0049752	119.22	3352300	0	0	0	1023800	1597200	581280	60339	47586	42085	52	Q2FZW9	D-isomer specific 2-hydroxyacid dehydrogenase, NAD binding domain protein	SAOUHSC_00866	3918996	**>	14.9661	12.6213	13.9233	19.9655	20.6071	19.1489	15.8808	15.5382	15.361	13.8369	19.9072	15.5934	3.59205	+	0	-3.91336	cluster6
SYNGEEVAAK	10	1066.49	Q2FZF1	yes	yes	2	2.9051e-05	161.17	2113600	0	0	0	820320	465780	827480	0	0	0		Q2FZF1	50S ribosomal protein L32	rpmF SAOUHSC_01078		**>	14.2054	14.1287	14.5396	19.6458	18.8293	19.6584	13.1863	12.4369	12.5122	14.2912	19.3778	12.7118	5.75777	+	0	-1.75358	cluster6
QAQIDQAPLNPDTTN	15	1624.77	Q2FW95	yes	yes	2	0.0028996	97.273	22594000	0	0	0	247620	11635000	6439300	2021900	1993000	258020		Q2FW95	Uncharacterized protein	SAOUHSC_02404	3919619	**>	14.1805	13.6957	14.8072	17.9178	23.472	22.6185	20.9473	20.9265	17.9771	14.2278	21.3361	19.9503	1.95917	+	0.0025	-6.41542	cluster6
MPKMKTHRGAA	11	1226.64	Q2FXQ0	yes	yes	2	0.0073425	96.143	24579000	0	0	0	1415100	6784700	2326000	11490000	330790	2232800	24	Q2FXQ0	50S ribosomal protein L35	rpmI SAOUHSC_01785	3920427	**>	13.8827	12.138	13.5211	20.4325	22.6939	21.1494	23.4539	18.3356	21.0904	13.1806	21.4252	20.96	2.76639	+	0	-8.012	cluster6
ADESKFEQ	8	952.414	Q2FZY9	yes	yes	2	2.0875e-51	279.87	5719900	469290	1032700	1292500	0	0	0	1050500	848760	1026200		Q2FZY9	UPF0337 protein SAOUHSC_00845	SAOUHSC_00845	3918957	**>	18.8401	19.978	20.3017	12.9424	13.5212	14.343	20.0026	19.695	19.9689	19.7066	13.6022	19.8888	4.65091	+	0	2.96108	cluster5
ADESKFEQAKGN	12	1322.61	Q2FZY9	yes	yes	2,3	5.0072e-26	215.72	33833000	6323500	2402100	4804800	0	46472	0	11457000	7513700	1284900		Q2FZY9	UPF0337 protein SAOUHSC_00845	SAOUHSC_00845	3918957	**>	22.5923	21.1959	22.196	12.5335	15.5041	12.6648	23.4497	22.8411	20.2932	21.9947	13.5674	22.1947	3.32659	+	0	4.11367	cluster5
ADESKFEQAKG	11	1208.57	Q2FZY9	yes	yes	2,3	4.3879e-10	186.46	7283500	992760	1234400	1437400	0	0	0	1638000	1187400	793500		Q2FZY9	UPF0337 protein SAOUHSC_00845	SAOUHSC_00845	3918957	**>	19.9211	20.2354	20.455	12.7375	13.8585	13.4683	20.6435	20.1794	19.5979	20.2038	13.3548	20.1402	5.54155	+	0	3.45632	cluster5
DVSGKHVLT	9	954.513	Q2FVF5	yes	yes	2	0.0036557	140.14	7503900	1913900	1531100	1097000	434380	0	0	216970	832420	1478200		Q2FVF5	Uncharacterized protein	SAOUHSC_02759	3921631	**>	20.8681	20.5461	20.0651	18.7286	13.9485	12.8817	17.7271	19.667	20.4954	20.4931	15.1863	19.2965	1.41254	+	0.00901408	3.25174	cluster5
ASQAAGYNFIH	11	1177.55	Q2G2J2	yes	yes	2	0.00047137	143.5	2143300	493080	629190	745610	13027	0	0	105170	81560	75679		Q2G2J2	Staphylococcal secretory antigen ssaA2	ssaA2 SAOUHSC_02571	3921568	**>	18.9115	19.2631	19.5081	13.6692	13.031	13.1406	16.6824	16.3156	16.2076	19.2276	13.2802	16.4018	5.99922	+	0	4.38651	cluster5
ADESKFEQA	9	1023.45	Q2FZY9	yes	yes	2	8.972e-10	209.6	6833300	388320	1751900	911000	0	0	0	1748600	1065900	967630		Q2FZY9	UPF0337 protein SAOUHSC_00845	SAOUHSC_00845	3918957	**>	18.5669	20.7405	19.7971	13.2384	14.7543	12.3872	20.7378	20.0236	19.8841	19.7015	13.46	20.2152	3.60942	+	0	2.86391	cluster5
ALNAANNEANKFG	13	1332.64	Q2FVQ2	yes	yes	2	3.596e-26	198.55	3306200	1065900	703970	1070600	0	0	0	269210	82362	114220		Q2FVQ2	Uncharacterized lipoprotein SAOUHSC_02650	SAOUHSC_02650	3921212	**>	20.0236	19.4252	20.03	13.4883	13.7036	13.6432	18.0384	16.3297	16.8015	19.8263	13.6117	17.0565	4.55142	+	0	4.49215	cluster5
AQHDEAQQNAFYQ	13	1548.66	P02976	yes	yes	2	0.0001319	126.83	838220	143060	234050	223320	14815	0	0	30502	72235	120250		P02976	Immunoglobulin G-binding protein A (IgG-binding protein A) (Staphylococcal protein A) (SpA)	spa SAOUHSC_00069	3919448	**>	17.1263	17.8365	17.7688	13.8548	13.6966	13.383	14.8966	16.1404	16.8757	17.5772	13.6448	15.9709	3.08521	+	0	2.76932	cluster5
KDDPSQSTNVLG	12	1259.6	P02976	yes	yes	2	0.0073795	104.87	796430	123490	219580	117680	0	0	0	60467	64402	210800		P02976	Immunoglobulin G-binding protein A (IgG-binding protein A) (Staphylococcal protein A) (SpA)	spa SAOUHSC_00069	3919448	**>	16.914	17.7444	16.8445	12.6082	13.4936	13.0072	15.8839	15.9748	17.6855	17.1676	13.0363	16.5147	3.12601	+	0	2.39212	cluster5
MVTDPNYQQ	9	1094.47	Q2FVQ2	yes	yes	2	5.9279e-79	215.88	2509800	407020	602380	480430	159230	0	0	388040	131810	340860		Q2FVQ2	Uncharacterized lipoprotein SAOUHSC_02650	SAOUHSC_02650	3921212	**>	18.6347	19.2003	18.874	17.2808	12.685	13.4373	18.5658	17.0081	18.3788	18.903	14.4677	17.9843	1.59042	+	0.00497098	2.67703	cluster5
TNSYRTGGLG	10	1024.49	Q2G2J2	yes	yes	2	3.1349e-05	160.53	2211700	213660	1001800	405520	25439	45854	0	143480	195830	180160		Q2G2J2	Staphylococcal secretory antigen ssaA2	ssaA2 SAOUHSC_02571	3921568	**>	17.705	19.9342	18.6294	14.6348	15.4848	12.8053	17.1305	17.5792	17.4589	18.7562	14.3083	17.3896	2.31084	+	0.00153712	2.90727	cluster5
YQPQNKINVV	10	1201.65	Q2G0Z9	yes	yes	2	0.036374	96.331	1874400	354040	193480	1043800	32337	80888	0	37488	74119	58302		Q2G0Z9	Uncharacterized protein	SAOUHSC_00362	3919781	**>	18.4336	17.5618	19.9934	14.9809	16.3036	13.3351	15.1941	16.1776	15.8313	18.6629	14.8732	15.7343	1.79843	+	0.00337647	3.35916	cluster5
KDDPSQSANVLG	12	1229.59	P02976	yes	yes	2	0.0019727	116.03	3832600	449540	1013300	270040	0	0	0	174080	349620	1576000		P02976	Immunoglobulin G-binding protein A (IgG-binding protein A) (Staphylococcal protein A) (SpA)	spa SAOUHSC_00069	3919448	**>	18.7781	19.9506	18.0428	13.6526	14.2542	13.4184	17.4094	18.4154	20.5878	18.9238	13.7751	18.8042	2.6941	+	0.000229885	2.6342	cluster5
MDTKDFKRLEKMY	13	1703.84	Q2FV54	yes	yes	2	0.041597	35.677	2773100	749110	1204900	561190	0	0	77188	73689	106990	0	9;10	Q2FV54	O-acetyltransferase OatA (EC 2.3.1.-)	oatA SAOUHSC_02885	3921554	**>	19.5148	20.2005	19.0981	12.896	14.2094	16.2361	16.1692	16.7071	12.5138	19.6045	14.4472	15.13	1.74634	+	0.00409169	4.81588	cluster5
FIQSLKDDPS	10	1148.57	P02976	yes	no	2	0.0060266	123.75	1570200	388170	228580	808890	0	0	0	78393	31631	34574		P02976	Immunoglobulin G-binding protein A (IgG-binding protein A) (Staphylococcal protein A) (SpA)	spa SAOUHSC_00069	3919448	**>	18.5663	17.8023	19.6256	13.2313	13.8286	13.0596	16.2584	14.9491	15.0774	18.6648	13.3732	15.4283	3.53049	+	0	4.26403	cluster5
LNAANNEANKFG	12	1261.61	Q2FVQ2	yes	yes	2	6.0622e-15	193.73	6674000	2055900	1453500	1697600	0	51415	27295	307150	412130	668950		Q2FVQ2	Uncharacterized lipoprotein SAOUHSC_02650	SAOUHSC_02650	3921212	**>	20.9713	20.4711	20.6951	14.0243	15.6499	14.7363	18.2286	18.6527	19.3515	20.7125	14.8035	18.7443	4.2896	+	0	3.9386	cluster5
GNNIAQGTFN	10	1034.48	Q2FZK7	yes	yes	2	3.0119e-07	179.42	4237800	642420	1493400	1367100	0	0	0	384930	65570	284350		Q2FZK7	Bifunctional autolysin [Includes: N-acetylmuramoyl-L-alanine amidase (EC 3.5.1.28); Mannosyl-glycoprotein endo-beta-N-acetylglucosaminidase (EC 3.2.1.96)]	atl nag SAOUHSC_00994	3920394	**>	19.2932	20.5102	20.3827	13.8829	15.0186	13.3797	18.5542	16.0007	18.1173	20.062	14.0937	17.5574	2.99083	+	0	4.23642	cluster5
YVAKSASQQNKENNTEA	17	1880.89	Q2G0B5	yes	yes	2,3	3.9372e-20	162.81	4256300	1121100	480930	575230	0	0	0	1022600	745280	311170		Q2G0B5	Uncharacterized protein	SAOUHSC_00690	3920994	**>	20.0965	18.8755	19.1338	12.1051	12.6323	13.6847	19.9638	19.5074	18.2473	19.3686	12.8074	19.2395	4.1301	+	0	3.34514	cluster5
KSTESNTNQDTNTTKDVIA	19	2065.98	Q2G105	yes	yes	3	0.021758	91.457	8163000	1572700	4706700	1616100	0	173490	0	94005	0	0		Q2G105	Uncharacterized protein	SAOUHSC_00356	3921829	**>	20.5848	22.1663	20.6241	12.8391	17.4045	13.5005	16.5205	13.5133	13.5917	21.1251	14.5814	14.5418	2.19208	+	0.00199197	6.56347	cluster5
SLKDDPSQSANVLG	14	1429.7	P02976	yes	yes	2	8.7894e-06	121.24	9073900	4985000	2706300	1291600	0	0	0	34253	20589	36145		P02976	Immunoglobulin G-binding protein A (IgG-binding protein A) (Staphylococcal protein A) (SpA)	spa SAOUHSC_00069	3919448	**>	22.2492	21.3679	20.3007	13.6343	14.7466	12.9079	15.0639	14.3296	15.1415	21.3059	13.7629	14.845	4.23609	+	0	7.00196	cluster5
LKDDPSQSTNVLG	13	1372.68	P02976	yes	yes	2	0.0001391	126.1	9687100	2587000	5064500	1920300	0	0	0	100170	0	15121		P02976	Immunoglobulin G-binding protein A (IgG-binding protein A) (Staphylococcal protein A) (SpA)	spa SAOUHSC_00069	3919448	**>	21.3028	22.272	20.8729	13.6773	13.9501	13.4189	16.6121	12.1257	13.8843	21.4826	13.6821	14.2074	3.1259	+	0	7.53787	cluster5
SLKDDPSQSTNVLG	14	1459.72	P02976	yes	yes	2	0.0074076	95.264	11549000	5597500	3917200	1933900	0	0	0	74682	0	25278		P02976	Immunoglobulin G-binding protein A (IgG-binding protein A) (Staphylococcal protein A) (SpA)	spa SAOUHSC_00069	3919448	**>	22.4164	21.9014	20.8831	13.6178	13.3793	13.2328	16.1885	12.5744	14.6256	21.7336	13.4099	14.4628	3.66611	+	0	7.79723	cluster5
LKDDPSQSANVLG	13	1342.67	P02976	yes	yes	2	0.00015715	125.03	20869000	6195900	8001200	6355800	0	0	0	219530	25593	71239		P02976	Immunoglobulin G-binding protein A (IgG-binding protein A) (Staphylococcal protein A) (SpA)	spa SAOUHSC_00069	3919448	**>	22.5629	22.9318	22.5996	13.6463	13.2367	14.2816	17.7441	14.6435	16.1204	22.6981	13.7215	16.1693	4.17897	+	0	7.75268	cluster5
AVESIYDASVNKN	13	1408.68	Q2FV17	yes	yes	2	1.846e-111	309.68	39510000	5951600	6081200	9508100	3433000	3979900	3200000	3378600	2073500	1903600		Q2FV17	Fructose-bisphosphate aldolase class 1 (EC 4.1.2.13) (Fructose-bisphosphate aldolase class I) (FBP aldolase)	fda SAOUHSC_02926	3921377	**>	22.5048	22.5359	23.1807	21.711	21.9243	21.6096	21.688	20.9836	20.8603	22.7405	21.7483	21.1773	2.3479	+	0.00160731	1.27768	cluster3
AVQEQDQQLSNNFGLQ	16	1817.85	Q2G189	yes	yes	2,3	9.3132e-64	233.78	11855000	3056800	691740	2580000	1037100	3288800	780280	215980	94761	109350		Q2G189	ESAT-6 secretion system extracellular protein A (Ess extracellular protein A)	esxA SAOUHSC_00257	3919199	**>	21.5436	19.3999	21.2989	19.9841	21.6491	19.5736	17.7205	16.532	16.7386	20.7475	20.4023	16.997	2.17616	+	0.00216471	2.0478	cluster3
EAARESGLEF	10	1107.52	Q2FW22	yes	yes	2	4.0552e-05	157.96	14704000	7801800	847310	4106400	494990	322440	216450	577510	175380	161450		Q2FW22	50S ribosomal protein L18	rplR SAOUHSC_02495	3920872	**>	22.8954	19.6925	21.9694	18.917	18.2987	17.7237	19.1395	17.4201	17.3007	21.5191	18.3131	17.9534	1.73876	+	0.00408	3.38583	cluster3
DNGKKQEIQVA	11	1228.64	Q2FVX4	yes	yes	2	0.0035258	124.67	170640000	41133000	57076000	55712000	5747500	5903000	3404200	0	477730	1187200		Q2FVX4	Molybdenum ABC transporter, periplasmic molybdate-binding protein	SAOUHSC_02549	3921137	**>	25.2938	25.7664	25.7315	22.4545	22.493	21.6989	13.1928	18.8658	20.1791	25.5972	22.2155	17.4126	1.99118	+	0.00234899	5.78319	cluster3
APKLQAQFD	9	1016.53	Q2FZG4	yes	yes	2	6.0067e-06	186.16	6458100	1844800	603810	2254100	280350	454410	246600	304680	257620	211720		Q2FZG4	Pyruvate dehydrogenase E1 component subunit alpha (EC 1.2.4.1)	pdhA SAOUHSC_01040	3919888	**>	20.815	19.2037	21.1041	18.0969	18.7936	17.9118	18.2169	17.9749	17.6918	20.3743	18.2674	17.9612	2.06575	+	0.00212014	2.25997	cluster3
EGENDVFVH	9	1044.45	Q2FYN2	yes	yes	2	0.0057019	136.8	5159900	500170	570960	782490	535710	291700	276020	631310	778910	792590		Q2FYN2	Cold shock protein CspA	cspA SAOUHSC_01403	3920693	**>	18.9321	19.123	19.5777	19.0311	18.1541	18.0744	19.268	19.5711	19.5962	19.2109	18.4199	19.4784	1.48989	+	0.00664	0.261779	cluster3
DYTGQAMVTDPNYQQ	15	1729.73	Q2FVQ2	yes	yes	2,3	9.5123e-107	296.85	500930000	82397000	73672000	111050000	43234000	62373000	28902000	46335000	33013000	19949000	14	Q2FVQ2	Uncharacterized lipoprotein SAOUHSC_02650	SAOUHSC_02650	3921212	**>	26.2961	26.1346	26.7266	25.3657	25.8944	24.7847	25.4656	24.9765	24.2498	26.3858	25.3482	24.8973	1.5365	+	0.00559391	1.263	cluster3
DQKVYNELTK	10	1236.63	Q2FW79	yes	yes	2,3	2.6092e-27	227.94	10301000	944110	1566400	2009100	2085400	2118600	652460	602040	188370	134930		Q2FW79	UPF0457 protein SAOUHSC_02425	SAOUHSC_02425	3919635	**>	19.8486	20.579	20.9381	20.9919	21.0147	19.3155	19.1995	17.5232	17.0419	20.4552	20.4407	17.9215	1.63678	+	0.00484946	1.27413	cluster3
ESNTNQDTNTTKDVIA	16	1749.8	Q2G105	yes	yes	2,3	1.2508e-43	203.27	201430000	38499000	71165000	43250000	32819000	4430900	3209700	3102000	4000900	955600		Q2G105	Uncharacterized protein	SAOUHSC_00356	3921829	**>	25.1983	26.0847	25.3662	24.968	22.0792	21.614	21.5648	21.9319	19.866	25.5497	22.8871	21.1209	1.85324	+	0.00300917	3.54574	cluster3
ASSKDSDIATTATK	14	1394.69	Q2FW22	yes	yes	2,3	1.1077e-26	186.77	12304000	568320	134490	263200	1884600	3670500	3062300	868290	811340	1040400		Q2FW22	50S ribosomal protein L18	rplR SAOUHSC_02495	3920872	**>	19.1163	17.0371	18.0058	20.8458	21.8075	21.5462	19.7278	19.6299	19.9887	18.0531	21.3999	19.7822	2.56483	+	0.000507937	-2.53791	cluster3
AKFVEGTKED	10	1122.56	Q2FXQ6	yes	yes	2,3	1.6659e-05	164.64	9628600	854190	570670	1463600	1951700	2320800	1285800	508020	446760	227200		Q2FXQ6	Trigger factor (TF) (EC 5.2.1.8) (PPIase)	tig SAOUHSC_01779	3919697	**>	19.7042	19.1223	20.4811	20.8963	21.1462	20.2942	18.9545	18.7691	17.7936	19.7692	20.7789	18.5058	2.02242	+	0.00217182	0.126863	cluster3
TVDNNKAKQAYDN	13	1479.7	Q2FW66	yes	yes	2,3	1.6791e-66	265.22	53498000	4171900	3255000	3775700	10055000	10875000	8956900	6568900	3966100	1874100		Q2FW66	Alkaline shock protein 23	asp23 SAOUHSC_02441	3919005	**>	21.9923	21.6342	21.8483	23.2614	23.3745	23.0946	22.6472	21.9193	20.8378	21.8249	23.2435	21.8014	1.56419	+	0.00532987	-0.697524	cluster3
MNKTDLINA	9	1018.51	Q2FYG2	yes	yes	2	2.3317e-06	193.38	11145000	603700	774570	867380	3316100	1863400	1503800	965110	679220	572070	34	Q2FYG2	DNA-binding protein HU, putative	SAOUHSC_01490	14478799	**>	19.2035	19.563	19.7263	21.6611	20.8295	20.5202	19.8803	19.3735	19.1258	19.4976	21.0036	19.4599	2.12229	+	0.00223881	-0.734134	cluster3
QQLSNNFGLQ	10	1147.56	Q2G189	yes	yes	2	2.9297e-09	188.87	16239000	2587000	3548900	1404100	1966700	2792600	1794100	1291300	392370	462170		Q2G189	ESAT-6 secretion system extracellular protein A (Ess extracellular protein A)	esxA SAOUHSC_00257	3919199	**>	21.3028	21.7589	20.4212	20.9073	21.4132	20.7748	20.3004	18.5819	18.8181	21.161	21.0318	19.2334	1.59927	+	0.00495491	1.02839	cluster3
ILNEDETTQTALQK	14	1602.81	Q2FW33	yes	yes	2,3	3.1152e-108	299.25	14177000	2376600	1192900	3460500	1550600	2588200	1323900	999790	402330	282270		Q2FW33	50S ribosomal protein L17	rplQ SAOUHSC_02484	3920861	**>	21.1805	20.186	21.7225	20.5644	21.3035	20.3364	19.9313	18.618	18.1067	21.0297	20.7348	18.8853	1.56247	+	0.00537824	1.21964	cluster3
GENDVFVH	8	915.409	Q2FYN2	yes	yes	2	0.00020912	193.28	7349700	146210	324090	469720	433400	678140	809970	1839900	1546600	1101700		Q2FYN2	Cold shock protein CspA	cspA SAOUHSC_01403	3920693	**>	17.1577	18.306	18.8414	18.7253	19.3712	19.6275	20.8112	20.5607	20.0713	18.1017	19.2414	20.4811	2.06256	+	0.00211268	-1.75949	cluster3
IDDNKGVTLAQ	11	1172.6	Q2FW22	yes	yes	2	4.3889e-06	160.67	5799700	345720	111040	200500	949000	1204200	1059700	825950	539630	563940		Q2FW22	50S ribosomal protein L18	rplR SAOUHSC_02495	3920872	**>	18.3992	16.7607	17.6132	19.856	20.1996	20.0152	19.6557	19.0416	19.1052	17.5911	20.0236	19.2675	2.47903	+	0.00086	-2.0545	cluster3
GPILTTKIEEE	11	1228.66	Q2FX05	yes	yes	2	1.006e-07	171.92	5014900	1448000	698740	865840	520960	679540	363990	184390	124440	129000		Q2FX05	Methionine aminopeptidase (MAP) (MetAP) (EC 3.4.11.18) (Peptidase M)	map SAOUHSC_02102	3921174	**>	20.4656	19.4144	19.7237	18.9908	19.3742	18.4735	17.4924	16.9251	16.977	19.8679	18.9462	17.1315	3.09806	+	0	1.82908	cluster3
FADEVKGQMK	10	1151.56	Q2FZ23	yes	yes	2,3	8.3176e-31	182.46	9698800	3018100	1070200	1851200	778580	844820	1283200	443860	309410	99375	40	Q2FZ23	Elongation factor Ts (EF-Ts)	tsf SAOUHSC_01234	3920259	**>	21.5252	20.0294	20.82	19.5705	19.6883	20.2913	18.7597	18.2392	16.6006	20.7916	19.85	17.8665	1.92429	+	0.0026242	1.9333	cluster3
SGVVTEIIK	9	944.554	Q2G0N0	yes	yes	2	0.011018	128.27	26391000	13092000	2722400	5508800	1432200	958190	547280	982170	717660	430430		Q2G0N0	Elongation factor Tu (EF-Tu)	tuf SAOUHSC_00530	3920383	**>	23.6422	21.3764	22.3933	20.4498	19.87	19.0619	19.9056	19.4529	18.7154	22.4706	19.7939	19.358	2.09485	+	0.00215827	2.8947	cluster3
VTVKGPGPGRE	11	1095.6	Q2FW31	yes	yes	2	9.1296e-05	152.54	5784400	126950	108520	506530	1735800	1554500	1326900	226150	98104	100910		Q2FW31	30S ribosomal protein S11	rpsK SAOUHSC_02486	31635125	**>	16.9539	16.7276	18.9503	20.7272	20.568	20.3396	17.7869	16.582	16.6227	17.5439	20.5449	16.9972	2.43203	+	0.000990476	-1.22715	cluster3
YTGQAMVTDPNYQQ	14	1614.7	Q2FVQ2	yes	yes	2	9.9406e-91	274.45	7318900	1772100	1392800	1064100	477000	759400	393220	874460	301220	284660	14	Q2FVQ2	Uncharacterized lipoprotein SAOUHSC_02650	SAOUHSC_02650	3921212	**>	20.757	20.4096	20.0212	18.8636	19.5345	18.585	19.738	18.2005	18.1189	20.3959	18.9944	18.6858	1.46004	+	0.00746798	1.55585	cluster3
TQPTNDAQHVYV	12	1371.64	Q2FXS4	yes	yes	2	0.00038641	136.53	8338900	761890	875910	4375200	861200	513130	693500	65454	121420	71235		Q2FXS4	Uncharacterized protein	SAOUHSC_01761	3920559	**>	19.5392	19.7404	22.0609	19.716	18.969	19.4035	15.9982	16.8896	16.1203	20.4469	19.3628	16.336	2.50204	+	0.000653061	2.59742	cluster3
NSSKVQTGDSVFA	13	1338.64	Q2FXJ6	yes	yes	2	1.1927e-14	176.25	7621900	1476400	1464800	3358800	315730	337690	187600	338250	104420	38196		Q2FXJ6	Uncharacterized protein	SAOUHSC_01838	3921788	**>	20.4937	20.4823	21.6795	18.2683	18.3653	17.5173	18.3677	16.672	15.2211	20.8851	18.0503	16.7536	2.15461	+	0.00219011	3.48317	cluster3
LGEVKTVPA	9	912.528	Q2FVX4	yes	yes	2	0.0079853	133.13	22940000	3347000	6051100	8365600	3263000	489970	585120	33604	614380	190360		Q2FVX4	Molybdenum ABC transporter, periplasmic molybdate-binding protein	SAOUHSC_02549	3921137	**>	21.6744	22.5288	22.996	21.6378	18.9023	19.1584	15.0363	19.2288	17.5384	22.3997	19.8995	17.2678	1.72256	+	0.00415686	3.81609	cluster3
NTNQDTNTTKDVIA	14	1533.73	Q2G105	yes	yes	2	2.0785e-19	169.04	26152000	8893600	8441600	5183700	1619400	776670	496650	427650	220280	92549		Q2G105	Uncharacterized protein	SAOUHSC_00356	3921829	**>	23.0843	23.0091	22.3056	20.627	19.5669	18.9219	18.7061	17.749	16.4979	22.7997	19.7053	17.651	3.04666	+	0	4.12152	cluster3
GVDADKVTEDA	11	1118.51	Q2FZ51	yes	yes	2	5.7547e-05	153.34	11153000	335450	293300	753810	3953600	1908200	3648800	80846	179220	0		Q2FZ51	Acyl carrier protein (ACP)	acpP hmrB SAOUHSC_01201	3919468	**>	18.3557	18.162	19.5238	21.9147	20.8638	21.799	16.3029	17.4514	13.0338	18.6805	21.5258	15.596	2.1742	+	0.00214786	0.119609	cluster3
