# Supplementary material for: Proteomic profiling of the endogenous peptides of MRSA and MSSA
Source: PeerJ journal article supplement (doi:10.7717/peerj.12508), 2021-11-24
Supplement: Supplementary_Table_S3.xlsx [file Supplementary_Table_S3.xlsx]

## Sheet: C-terminal
Table S3. Sequences matching the enriched motif at the C-terminus in MSSA-AEP
Motif	Score	P-value	Sequence	Protein	Length	Description
xxxxxx_V_xxxKxx	4.49	0.021	TNTTKDVIALKDV	Q2G105	12	Uncharacterized protein
xxxxxx_V_xxxKxx	4.49	0.021	TFTVDGVRFTKGQ	Q2FVV8	11	Transcriptional regulator, putative
xxxxxx_V_xxxKxx	4.49	0.021	DSNYTSVKDLKDN	Q2FVX4	10	Molybdenum ABC transporter, periplasmic molybdate-binding protein
xxxxxx_V_xxxKxx	4.49	0.021	NPVLKNVKAIKED	Q2G071	10	Uncharacterized protein
xxxxxx_V_xxxKxx	4.49	0.021	GQINQQVDNAKEN	Q2FVI6	11	Uncharacterized protein
xxxxxx_V_xxxKxx	4.49	0.021	KGPDLYVYLTKNG	Q2G2G0	12	Uncharacterized protein
xxxxxx_V_xxxKxx	4.49	0.021	GEWAYKVTQQKSG	Q2G105	10	Uncharacterized protein
