# Supplementary material for: Proteomic profiling of the endogenous peptides of MRSA and MSSA
Source: PeerJ journal article supplement (doi:10.7717/peerj.12508), 2021-11-24
Supplement: Supplementary_Table_S4.xlsx [file Supplementary_Table_S4.xlsx]

## Sheet: Sheet1
Table S4.Enriched gene ontology terms and KEGG pathways in DE endogenous peptides between MSSA and MRSA
Category	Term	Count	%	PValue	Genes	List Total	Pop Hits	Pop Total	Fold Enrichment	Bonferroni	Benjamini	FDR
GOTERM_BP_DIRECT	translation	14	0.159526	2.79944e-09	RPLU, RPLR, RPLQ, RPSC, RPSD, GATB, RPLX, RPLD, RPLC, RPLA, RPSH, RPLJ, RPSR, RPMI	39	62	1338	7.7469	1.11977e-07	1.09178e-07	1.09178e-07
GOTERM_MF_DIRECT	structural constituent of ribosome	13	0.148131	9.0828e-09	RPLU, RPLR, RPLQ, RPSC, RPSD, RPLX, RPLD, RPLC, RPLA, RPSH, RPLJ, RPSR, RPMI	47	53	1583	8.26134	4.45057e-07	4.5414e-07	4.5414e-07
GOTERM_MF_DIRECT	rRNA binding	9	0.102552	3.55187e-06	RPLD, RPLU, RPLC, RPSH, RPLA, RPSC, RPSD, RPSR, RPLX	47	35	1583	8.66079	0.000174027	8.87966e-05	8.87966e-05
GOTERM_MF_DIRECT	penicillin binding	3	0.0341841	0.00243372	SAOUHSC_01652, SAOUHSC_01145, SAOUHSC_01467	47	3	1583	33.6809	0.112545	0.040562	0.040562
GOTERM_MF_DIRECT	hydroxypyruvate reductase activity	2	0.0227894	0.0847195	SAOUHSC_00866, SAOUHSC_02577	47	3	1583	22.4539	0.986934	0.847195	0.847195
GOTERM_MF_DIRECT	glyoxylate reductase (NADP) activity	2	0.0227894	0.0847195	SAOUHSC_00866, SAOUHSC_02577	47	3	1583	22.4539	0.986934	0.847195	0.847195
GOTERM_CC_DIRECT	cytosolic large ribosomal subunit	6	0.0683683	0.00172221	RPLU, RPLR, RPLQ, RPLA, RPMI, RPLX	57	23	1388	6.3524	0.0322197	0.032722	0.032722
KEGG_PATHWAY	Ribosome	13	0.148131	2.2783e-06	RPLU, RPLR, RPLQ, RPSC, RPSD, RPLX, RPLD, RPLC, RPLA, RPSH, RPLJ, RPSR, RPMI	35	71	928	4.85473	6.83467e-05	6.83489e-05	6.83489e-05
KEGG_PATHWAY	Carbon metabolism	8	0.0911577	0.0229939	SAOUHSC_02366, SUCC, SAOUHSC_01040, ENO, SAOUHSC_01042, SAOUHSC_01901, GCVT, SAOUHSC_01347	35	81	928	2.61869	0.502356	0.322294	0.322294
KEGG_PATHWAY	beta-Lactam resistance	3	0.0341841	0.0399283	SAOUHSC_01652, SAOUHSC_01145, SAOUHSC_01467	35	9	928	8.8381	0.705483	0.322294	0.322294
KEGG_PATHWAY	Citrate cycle (TCA cycle)	4	0.0455789	0.0429725	SUCC, SAOUHSC_01040, SAOUHSC_01042, SAOUHSC_01347	35	22	928	4.82078	0.732248	0.322294	0.322294
